# Supplementary material for: Off-the-shelf proximity biotinylation using ProtA-TurboID
Source: Springer Nature journal article supplement (doi:10.1038/s41596-022-00748-w), 2022-10-12
Supplement: MOESM2 [file 41596_2022_748_MOESM2_ESM11.xlsx]

## Sheet: H3K9me3
H3K9me3_1	H3K9me3_2	H3K9me3_3	IgG_1	IgG_2	IgG_3	iBAQ H3K9me3_1	iBAQ H3K9me3_2	iBAQ H3K9me3_3	iBAQ IgG_1	iBAQ IgG_2	iBAQ IgG_3	Unique peptides	-Log t-test p value	t-test Difference	Protein IDs	Majority protein IDs	Protein names	Gene names
28.5689	31.0019	29.0703	24.6656	24.6286	23.5226	81627000	425960000	98256000	13289000	97497000	11784000	1	2.5007	5.27474	P68431	P68431	Histone H3.1	HIST1H3A
28.4874	28.6259	28.4077	23.7604	22.4396	23.8373	7062400	5391500	6087500	0	23736	0	16	3.45158	5.16121	Q6N043;B4DHL1;A0A024R5W1;A8K124;H0YL38;H0YLA6;Q9H740	Q6N043;B4DHL1;A0A024R5W1;A8K124	Zinc finger protein 280D	ZNF280D
32.7658	33.004	32.4666	28.1576	27.7986	26.9703	186060000	150480000	132990000	2140300	1173100	697260	29	3.73039	5.10334	Q9NQS7;B3KPD3;E9PM67	Q9NQS7;B3KPD3	Inner centromere protein	INCENP
28.1739	28.4275	28.6161	24.175	22.5415	24.6462	11301000	10139000	12275000	11395000	8739800	9908800	3	2.68226	4.61826	A0A0A6YYG7;Q6IBW4;E5RJN3;H0YC55	A0A0A6YYG7;Q6IBW4;E5RJN3	Condensin-2 complex subunit H2	NCAPH2
27.1667	27.0612	26.9249	22.1381	22.1277	23.5112	5909000	640960	2275200	825640	420030	30112	3	3.1806	4.45857	Q96IR2;Q6ZN06;M0R0Z8;M0R1K6;M0QZA2;M0R2L4;M0R2N3;M0QX96	Q96IR2;Q6ZN06	Zinc finger protein 845;Zinc finger protein 813	ZNF845;ZNF813
30.6492	30.6769	30.3344	26.9111	26.4887	25.238	40868000	30953000	28032000	1211000	699340	433530	32	2.96718	4.34091	Q9NRZ9;A0A0B4J1V9;Q6I7N8;F6XU50;A0A087WSW7;Q9NW36;B1ALG6	Q9NRZ9;A0A0B4J1V9;Q6I7N8;F6XU50;A0A087WSW7	Lymphoid-specific helicase	HELLS
29.1482	29.0455	27.7043	25.1257	24.6861	23.4502	37933000	24957000	20482000	724260	468330	117470	16	2.45223	4.21201	Q53HL2;A8K7A2;B4DXT3	Q53HL2;A8K7A2	Borealin	CDCA8
28.9369	28.7114	27.9986	25.6486	24.7305	24.4041	6277700	5117800	4689400	461200	125530	171820	26	2.82414	3.62125	A0A1B0GV09;Q9H9B1;A0A1B0GU48;A0A0C4DGF8;A0A1B0GVZ8;A0A1B0GUD1;A0A1W2PPZ7;A0A0D9SEQ1;A0A1B0GWF6;A0PJE0;A0A0D9SFX4;A0A1B0GW79;A0A0D9SER9;A0A0D9SFS4;A0A0D9SER3;A0A0D9SFG7;Q71M33;A0A0D9SF38;A0A0D9SEP2;A0A0D9SFD7;A0A0D9SEY2;A0A0D9SFM6;A0A1B0GTP4;A0A1B0GV89	A0A1B0GV09;Q9H9B1;A0A1B0GU48;A0A0C4DGF8	Histone-lysine N-methyltransferase EHMT1	EHMT1
26.7818	26.9166	26.5625	22.2178	22.8963	24.3176	3228500	3825700	2127400	234020	53628	245500	10	2.34483	3.60973	Q8TBE0;A0A024R9K2	Q8TBE0;A0A024R9K2	Bromo adjacent homology domain-containing 1 protein	BAHD1
26.7397	26.6883	26.285	22.807	23.9252	22.3697	2866200	2429600	1447700	0	0	0	9	2.72612	3.53704	Q5T3J3	Q5T3J3	Ligand-dependent nuclear receptor-interacting factor 1	LRIF1
26.3082	26.5544	26.7579	23.0764	23.2057	22.7634	2865100	3226800	3801700	588650	505220	681030	8	4.35192	3.52499	Q6LES9;P40937;A8K3S0;Q59GW7;A8K4Z2;F5H5S0;E9PEP3;C9JH72;F5H304;F5H0U6	Q6LES9;P40937;A8K3S0;Q59GW7;A8K4Z2;F5H5S0	Replication factor C subunit 5	RFC5
27.7788	28.0411	27.5158	25.3028	24.8838	22.7955	1462100	1358200	1050100	92654	47663	16567	18	1.92128	3.45118	B9EGR5;Q8IWI9;H3BP52;H3BTF4;Q9H6M4;H3BTN2	B9EGR5;Q8IWI9;H3BP52;H3BTF4;Q9H6M4	MAX gene-associated protein	MGA
27.9379	28.2508	28.5567	22.6381	23.6337	28.1388	9902200	7812100	12411000	1501300	1216500	2382300	1	0.94723	3.44493	Q05CW7	Q05CW7		NAT10
27.6593	28.0018	27.6518	25.8537	23.0876	24.1058	2451200	2157000	2035600	201660	17855	49535	30	1.8613	3.42192	Q13129;Q59GL0	Q13129;Q59GL0	Zinc finger protein Rlf	RLF
26.4304	26.5843	26.349	22.6794	22.7813	23.7074	3227300	2039100	3138400	52970	0	0	11	3.27853	3.39853	Q56NI9;E5RFE4;E5RFP7;H0YB88;E5RIE3	Q56NI9	N-acetyltransferase ESCO2	ESCO2
26.5094	26.958	26.9808	23.4106	23.2954	23.5954	3784700	2155100	1019700	271120	155520	163490	8	4.35858	3.38228	Q9NXF1;A0A024R169;B4DQR0;A0A0A0MSR3;B7Z9D5	Q9NXF1;A0A024R169;B4DQR0	Testis-expressed sequence 10 protein	TEX10
29.773	29.8578	29.3937	26.9365	26.447	25.496	20074000	31001000	13833000	659010	552070	401770	24	2.7886	3.38171	Q4VC44;J3KNW1;I3L188;B3KRZ0;B3KPY2;B3KP60;I3L287;I3L1A7;I3L0R3;I3L231;I3L4V9;I3L4I0;Q96CP2;I3L1Y9	Q4VC44;J3KNW1;I3L188;B3KRZ0	FLYWCH-type zinc finger-containing protein 1	FLYWCH1
26.7689	26.9904	26.4678	24.7071	22.8501	22.6008	8121600	6394300	4844500	406760	0	0	5	2.10225	3.35637	Q9NYP9	Q9NYP9	Protein Mis18-alpha	MIS18A
26.6287	26.9336	26.6476	23.7665	23.7834	22.9855	4907800	2971100	3855000	4085200	1332200	1299300	7	3.48222	3.22482	Q9UIS9;A8K654;B4DI41;B4DUR3;A0A0A0MS90;K7EPZ6;Q59EP6;K7EN65;K7EMA9	Q9UIS9;A8K654;B4DI41;B4DUR3;A0A0A0MS90;K7EPZ6	Methyl-CpG-binding domain protein 1	MBD1
28.6622	29.3054	28.5186	26.186	25.568	25.3546	7949700	8095400	7962600	876480	478450	293150	28	3.07343	3.12582	Q69YH5;E9PEI0;A8K8Z0;B7Z5Q5;B3KRS8	Q69YH5;E9PEI0;A8K8Z0;B7Z5Q5	Cell division cycle-associated protein 2	CDCA2
28.3849	28.5651	27.9837	25.8603	25.4785	24.2555	5849100	4161500	3526700	502800	263260	170640	25	2.42707	3.11313	Q6P0N0;G5E9K5;H7C1S6;C9J2Q8;H0YJM1	Q6P0N0	Mis18-binding protein 1	MIS18BP1
26.71	26.5868	26.5297	23.5775	23.8163	23.2239	2481500	1749800	2449000	52800	0	0	9	4.158	3.0696	Q9UBD5;B4E014;B7Z8A5;B7ZAI3;Q6IBJ0;B4DZ51;U3KQL3	Q9UBD5;B4E014;B7Z8A5;B7ZAI3	Origin recognition complex subunit 3	ORC3
32.1879	24.3782	24.99	24.884	24.9195	22.8816	604450000	4573100	3425100	1382700	1454700	1365300	9	0.497134	2.95699	P06702;B2R4M6	P06702;B2R4M6	Protein S100-A9	S100A9
28.5358	28.6758	28.312	26.2323	25.1544	25.3711	5820400	5232400	4756200	405310	125980	225810	22	2.96874	2.92194	Q96JM3;S4R3K0	Q96JM3	Chromosome alignment-maintaining phosphoprotein 1	CHAMP1
26.6221	26.2254	26.2577	25.8176	22.4793	22.1756	1890400	916030	1573900	304780	426440	90518	9	1.15307	2.87759	O14980;C9JKM9;C9IZS4;C9JQ02;C9JV99;C9J673;F8WF71;C9JF49;C9IYM2;H7BZC5;B3KWD0;B7ZB16;B4DR01	O14980;C9JKM9;C9IZS4;C9JQ02;C9JV99;C9J673	Exportin-1	XPO1
26.9391	27.8885	26.8334	24.5623	23.7222	24.8184	2734000	2403300	2377300	84233	39357	71227	14	2.42476	2.8527	M0QXA7;B9EGQ5;O95785;B3KR89	M0QXA7;B9EGQ5;O95785;B3KR89	Protein Wiz	WIZ
25.4676	25.8484	26.0057	22.8928	23.0265	22.9954	4291400	2502100	2954000	1751500	576950	815310	5	4.15453	2.80235	Q9P035;H3BS72;H3BPZ1	Q9P035;H3BS72;H3BPZ1	Very-long-chain (3R)-3-hydroxyacyl-[acyl-carrier protein] dehydratase 3	PTPLAD1
30.4789	30.8203	30.8418	23.4344	30.1285	30.2344	229360000	220820000	245330000	88895000	49213000	70450000	3	0.545953	2.78119	Q6IBH6;P61254;J3QRI7;J3QQQ9;J3QQV1;J3QRC4;J3KTJ8;A0A024RBF6;J3KSS0;J3KS10	Q6IBH6;P61254;J3QRI7;J3QQQ9;J3QQV1;J3QRC4;J3KTJ8;A0A024RBF6;J3KSS0	60S ribosomal protein L26	RPL26;KRBA2
25.647	25.707	25.5533	22.2366	22.8557	23.8405	748890	461520	514060	31994	0	0	6	2.32012	2.65816	A0A1B0GUH9;A0A1P0AZG4;A0PJI9	A0A1B0GUH9;A0A1P0AZG4;A0PJI9		C10orf12
25.858	25.701	25.1922	22.8869	23.0232	22.8724	504170	256670	192260	0	24426	0	11	3.67549	2.65623	Q9NR48	Q9NR48	Histone-lysine N-methyltransferase ASH1L	ASH1L
29.1259	29.3108	29.3093	27.3573	26.3387	26.1548	5760400	5200700	4308900	338340	132810	156150	44	2.64614	2.63173	A6NHR9;J3KTL8;J3KRK8	A6NHR9;J3KTL8	Structural maintenance of chromosomes flexible hinge domain-containing protein 1	SMCHD1
26.3719	26.1308	26.0605	25.0559	22.7488	23.0162	3028300	2386200	2750400	398560	84881	111600	6	1.60895	2.58074	Q15697;Q8IZN5;I3L2H2;V9GZ69	Q15697;Q8IZN5;I3L2H2	Zinc finger protein 174	ZNF174
26.7264	27.4999	26.6611	25.2329	24.0351	24.2177	1779100	1599400	1297300	255620	82924	45252	14	2.23495	2.46724	Q5TGY3	Q5TGY3	AT-hook DNA-binding motif-containing protein 1	AHDC1
32.7244	27.7249	26.9876	25.9396	27.044	27.0571	735280000	12205000	8708900	1783700	1546900	2714600	12	0.599886	2.46541	P47929	P47929	Galectin-7	LGALS7
26.9363	27.1023	26.9819	25.6782	24.9025	23.1297	10526000	8225100	8480200	1109400	406370	195560	7	1.49263	2.43669	Q5U079;P17275;Q53HP8	Q5U079;P17275;Q53HP8	Transcription factor jun-B	JUNB
25.872	25.8057	25.9268	23.922	23.607	22.8007	4133800	2964300	3754100	804720	601300	535710	2	2.71026	2.42495	Q9HAV0;A8K3F6;B4DLV5;H7C5J5	Q9HAV0;A8K3F6;B4DLV5	Guanine nucleotide-binding protein subunit beta-4	GNB4
29.2617	29.3988	29.199	27.5804	26.5326	26.5134	10740000	8103600	6649000	952780	393680	386520	37	2.59905	2.41108	Q9H582;A7E234;A0A087WZL9;Q9NVH8;Q9NZF0;Q569I6;Q9H8J8;Q8NEI6;Q9H835	Q9H582;A7E234;A0A087WZL9;Q9NVH8;Q9NZF0	Zinc finger protein 644	ZNF644
26.5713	27.5182	27.1973	24.9784	25.3978	23.6901	754140	672910	705910	27246	28965	33348	26	1.83516	2.40682	P51587;A1YBP1;Q9BX99;A0A0F6RAD2;B2ZAH0;A0A068BCA8;A0A068BDT0;Q8IU64;A0A068BFW6;A0A068BI50;A0A068BFX3;A0A068BDV3;A0A0F6RAU4;A0A0F6RAD4;A0A0F6RAU8;A0A0S2ZZE6;A0A0S2ZYN1;A0A0S2ZYP9;A0A0S2ZYV0;A0A0F6TMQ3	P51587;A1YBP1	Breast cancer type 2 susceptibility protein	BRCA2
26.5639	26.5539	26.3572	25.7487	22.6773	23.9987	3309000	3007100	2307700	288600	32073	0	9	1.23721	2.3501	Q53H10;A0A024R2I7;Q9NS91;F8WE49;H7C3I2	Q53H10;A0A024R2I7;Q9NS91	E3 ubiquitin-protein ligase RAD18	RAD18
25.8005	26.1733	26.5623	23.6921	24.6142	23.2473	2555700	10130000	3347800	316060	0	326660	3	2.14811	2.32753	B3KMA8;K7EIE8;O95983;A0A087WT34;A0A087X1H1;A0A0A0MTS6	B3KMA8;K7EIE8;O95983;A0A087WT34;A0A087X1H1;A0A0A0MTS6	Methyl-CpG-binding domain protein 3	MBD3
28.2234	28.3125	27.9607	26.0469	25.1919	26.3058	3181900	2254800	2339400	289920	113950	215090	25	2.5564	2.31734	Q14669;G5E9G6;B4DYJ6;C9JLJ5;C9JSX9;C9JLD7;F8W9P3;H7C1L9;Q57Z94;H7C2Y1	Q14669	E3 ubiquitin-protein ligase TRIP12	TRIP12
26.2368	26.1727	26.5316	24.1235	24.1451	23.8144	1992000	1812100	1715600	135250	64282	57533	13	3.92441	2.28604	Q8NCN4;H0YEQ1	Q8NCN4	E3 ubiquitin-protein ligase RNF169	RNF169
28.855	29.0589	29.0431	27.5129	26.6477	25.9486	5277700	3812400	3211500	489970	263090	181600	40	2.1234	2.2826	Q5VWN6;Q6IPC8;J3KPH3	Q5VWN6	Protein FAM208B	FAM208B
26.0421	26.2057	26.0876	24.2559	23.1695	24.079	1486600	1302400	1265400	97391	0	0	6	2.58708	2.27699	Q6IQ32;A0A024R377	Q6IQ32;A0A024R377	ADNP homeobox protein 2	ADNP2
26.6953	27.334	27.3433	26.0144	25.2072	23.3273	1532100	1537700	1395300	247940	47423	19289	24	1.29325	2.27455	Q7Z5J4;A0A1W2PQJ7;A8MXE8	Q7Z5J4;A0A1W2PQJ7	Retinoic acid-induced protein 1	RAI1
27.3898	26.941	26.524	27.3001	23.1425	23.6771	12939000	4588900	3072300	3527900	2636400	2568400	2	0.778363	2.24508	B1AMN7;Q9P2B4;A0A024R0C7	B1AMN7;Q9P2B4;A0A024R0C7	CTTNBP2 N-terminal-like protein	CTTNBP2NL
27.8384	27.7936	27.0678	25.9062	24.6563	25.4109	2004900	1470800	1727100	172620	51680	97824	18	2.15149	2.24214	Q96QE3;A0A075B754;H0UIC2	Q96QE3;A0A075B754;H0UIC2	ATPase family AAA domain-containing protein 5	ATAD5
25.3459	26.3609	27.0183	24.5288	23.8057	23.8043	791640	3395000	3288000	196020	112120	140700	3	1.80796	2.19546	B4E3U6;A0A024R775;Q96PQ6;B3KPP0;B2RB98;A0A024R7B1	B4E3U6;A0A024R775;Q96PQ6;B3KPP0;B2RB98;A0A024R7B1	Zinc finger protein 317	ZNF317
26.0357	26.3667	26.077	25.4561	23.4011	23.0513	612090	409390	426230	73319	28867	34647	11	1.35194	2.19029	Q7Z333;A0A024R8E8;X6RI79;A0A0S2Z550;A0A0S2Z520	Q7Z333;A0A024R8E8	Probable helicase senataxin	SETX
28.3281	28.045	28.6539	27.6518	27.8085	23.149	64629000	29114000	71701000	10850000	8660200	6978100	5	0.62601	2.13919	P62318;H3BT13	P62318;H3BT13	Small nuclear ribonucleoprotein Sm D3	SNRPD3
25.175	25.57	25.5896	22.5869	22.7387	24.6759	628170	606650	637840	0	17838	40697	6	1.43175	2.11107	P51531;F6VDE0;A0A0U1RQZ9;B4DK35;B4DSC8;A0A0U1RRG6;A0A0U1RQU0;F6XE55;A0A0U1RQW7;A0A0U1RRN2;A0A0U1RR83;A0A0U1RQX3;A0A0U1RR26;B4DNT1;B1ALF6;A0A0U1RRJ8;A0A0U1RRJ4	P51531;F6VDE0;A0A0U1RQZ9;B4DK35;B4DSC8	Probable global transcription activator SNF2L2	SMARCA2
27.5282	28.0457	27.0327	25.5832	25.2837	25.4524	1633500	1415200	1240700	159140	104440	113180	17	2.62877	2.09575	P46100;A4LAA3;A0A096LNW1;A0A096LNL9;A0A096LNN3;B4DHH8;B4DLE1;B4DLW1;A0A087WWG0;A0A096LNL6;A0A067XLH7;A0A096LNR8;Q86U63;A0A096LNL7;Q5H9A3;A0A096LNX6;H0Y3T0;B7Z1D8	P46100;A4LAA3;A0A096LNW1	Transcriptional regulator ATRX	ATRX
25.4231	25.9443	25.7048	22.5574	23.2854	24.9739	670940	703270	669980	15318	0	39853	10	1.33393	2.08515	Q92547;A7E2X7;A0AV47;Q05BV8	Q92547;A7E2X7;A0AV47	DNA topoisomerase 2-binding protein 1	TOPBP1
25.2952	25.1632	25.1189	24.5885	21.9981	22.7862	771310	1078500	534880	127220	40035	73604	5	1.26292	2.06815	A0A024R2M8;X5DRB1;Q01831;D9I4E1;A8K146;D2CPJ9;D2CPI9;D2CPJ0;D2CPJ1;D2CPI8;D2CPK6;D2CPK1;E7EUB5	A0A024R2M8;X5DRB1;Q01831;D9I4E1;A8K146	DNA repair protein complementing XP-C cells	XPC
31.2945	23.888	25.5643	22.4606	25.3474	26.7446	161070000	1165300	1416000	398580	785790	3370900	15	0.330492	2.06475	P31947;Q04917;B2R6N6;A0A024R1K7;A2IDB2;Q9H4N8	P31947	14-3-3 protein sigma	SFN
27.401	27.3751	27.3324	25.8414	25.2371	24.8713	2952500	1949700	2104000	248630	114930	90119	13	2.71393	2.05288	P42695;G3V1A9;Q96FA6;E9PKK4;E9PQA3	P42695;G3V1A9	Condensin-2 complex subunit D3	NCAPD3
27.517	25.8123	26.0231	26.0529	23.2389	23.9338	10647000	1965800	3866900	1568600	0	0	2	0.953929	2.04225	Q3ZCM7;A0A075B736;Q5SQY0;A0A183YE00	Q3ZCM7;A0A075B736;Q5SQY0;A0A183YE00	Tubulin beta-8 chain	TUBB8
24.9188	25.2893	25.1056	21.88	23.6166	23.8533	745780	720200	597830	31953	25626	0	5	1.46173	1.98789	Q9UBC3;B3KM53;Q8WVA9;Q6PJ37;A0A0C4DG02;Q9Y6K1	Q9UBC3;B3KM53	DNA (cytosine-5)-methyltransferase 3B	DNMT3B
28.7992	28.7149	28.4975	26.9691	26.4774	26.6056	12862000	9512800	8575600	812590	453590	455140	21	3.48836	1.98653	Q8ND82;Q9UJJ2;Q86YH2;B3KUN2;A0A0D9SEJ8	Q8ND82;Q9UJJ2	Zinc finger protein 280C	ZNF280C
25.7193	25.8757	25.4968	23.1561	24.3192	23.7711	780300	603050	637770	41655	44651	66388	7	2.2769	1.94846	B4DYH4;Q14676;A0A1U9XBF2;A0A1U9XBE3;A0A1U9XBE1;A0A1U9XBE0;A0A1U9XBD9;A0A1U9XBD4;A0A1U9XBC3;A0A1U9XBC2;A0A1U9XBC1;A0A1U9XBC0;A0A1U9XBB2	B4DYH4;Q14676;A0A1U9XBF2;A0A1U9XBE3;A0A1U9XBE1;A0A1U9XBE0;A0A1U9XBD9;A0A1U9XBD4;A0A1U9XBC3;A0A1U9XBC2;A0A1U9XBC1;A0A1U9XBC0;A0A1U9XBB2	Mediator of DNA damage checkpoint protein 1	MDC1
25.2286	25.0653	24.6996	23.0932	22.8619	23.2406	594400	358750	257390	0	0	0	7	3.26733	1.93264	Q562F6;B7Z7S9	Q562F6;B7Z7S9	Shugoshin-like 2	SGOL2
26.3794	26.2326	25.9785	23.3821	23.4862	25.9657	2397200	1909600	1476000	252990	169310	500390	2	1.05775	1.91883	B4DIX5;Q8TD43	B4DIX5;Q8TD43	Transient receptor potential cation channel subfamily M member 4	TRPM4
24.956	24.5116	25.7751	21.6145	23.7216	24.2319	422570	365430	555730	63675	51452	112220	3	1.00577	1.8916	Q92797;B7Z6F7;A0A024R0R6;A0A087WUE9;Q4LE61;M0R3C7	Q92797;B7Z6F7;A0A024R0R6;A0A087WUE9;Q4LE61	Symplekin	SYMPK;SYMPK variant protein
30.8719	30.9527	30.5493	28.7641	29.1812	28.7671	89444000	70272000	68665000	6171600	4613300	3942300	15	3.28013	1.88715	P42167;A0A024RBE7;G5E972;A0A024RBH7;Q59G12;H0YJH7;Q9P1N8	P42167;A0A024RBE7;G5E972;A0A024RBH7;Q59G12	Lamina-associated polypeptide 2, isoforms beta/gamma;Thymopoietin;Thymopentin	TMPO
24.925	25.3377	25.5071	25.0797	23.2435	21.9151	1350200	1276800	1256700	234640	84003	154950	6	0.922696	1.84384	Q96K58;B2RDP4;A8K1I4;A0A024QZD9;C9JCJ0	Q96K58;B2RDP4;A8K1I4;A0A024QZD9	Zinc finger protein 668	ZNF668
24.8728	24.9805	25.3267	23.5127	23.5381	22.6604	1437100	847270	1539400	0	0	0	4	2.33229	1.8229	Q9HD72;A8K6Y8;A0A024R1H7;A0A024R1F8;Q9HBE1;A0A024R1M5;Q59HH1	Q9HD72;A8K6Y8;A0A024R1H7;A0A024R1F8;Q9HBE1;A0A024R1M5;Q59HH1	POZ-, AT hook-, and zinc finger-containing protein 1	PATZ1
25.2962	25.4733	25.4674	23.1745	25.0907	22.507	873860	607040	915160	63308	186730	0	5	1.10307	1.82158	A0A0A0MSU2;A0PJD3;Q6PJG2;A0A024R689;A0A1C7CYX1;Q8NF55;H7C1L3	A0A0A0MSU2;A0PJD3;Q6PJG2;A0A024R689;A0A1C7CYX1	ELM2 and SANT domain-containing protein 1	C14orf43;ELMSAN1
24.8398	24.9223	25.2696	22.6381	24.1783	22.7827	1219600	932640	1089300	228310	74351	108820	5	1.62805	1.81087	Q4FD37;Q9UQR1;Q8TDH4;B2RAI2;G5E9X2;Q8IWK7;Q15552	Q4FD37;Q9UQR1;Q8TDH4;B2RAI2	Zinc finger protein 148	ZNF148
24.2787	23.7056	25.5676	22.9837	22.989	22.1979	382110	175480	844630	27677	0	0	4	1.37276	1.79378	Q8NB90;J3QRR3;J3QRW1;J3QLH6;J3KRP2;J3QSA9;J3QQM1;Q59GS3;P62195;A0A140VJS3	Q8NB90	Spermatogenesis-associated protein 5	SPATA5
25.4905	25.5635	25.9593	23.9722	23.7858	23.8856	7412000	6010100	8660300	1285400	861810	1427300	1	3.49022	1.78991	P17096;B4DWA0;A0A024RCT9	P17096;B4DWA0;A0A024RCT9	High mobility group protein HMG-I/HMG-Y	HMGA1
27.0178	27.1939	27.2897	26.0461	25.164	24.9221	2729600	2519200	1939200	371530	211030	94641	19	2.15681	1.78973	A0A0G2JIS2;Q96KQ7;A0A1U9X7P8;A0A024RCN9;Q59FM7;A2ABF8;A0A0G2JIR1;A2ABF9;A0A0G2JK64;A0A0G2JRR0;A0A0G2JRN8;B7Z852;H0Y4K5	A0A0G2JIS2;Q96KQ7;A0A1U9X7P8;A0A024RCN9;Q59FM7;A2ABF8;A0A0G2JIR1;A2ABF9;A0A0G2JK64;A0A0G2JRR0;A0A0G2JRN8;B7Z852	Histone-lysine N-methyltransferase EHMT2	EHMT2
25.1115	26.0077	25.2384	23.9966	23.4647	23.5488	1100700	2188500	1586100	588020	583300	538440	4	2.26894	1.78249	Q6P1K8;Q13888;D6RIT7;D6RGC9;Q86U80;D6RJD3;B4DKI6;D6RID8;D6RAW1;R4GMS9;B7ZW82	Q6P1K8;Q13888;D6RIT7;D6RGC9;Q86U80;D6RJD3;B4DKI6;D6RID8;D6RAW1;R4GMS9	General transcription factor IIH subunit 2-like protein;General transcription factor IIH subunit 2	GTF2H2C;GTF2H2
27.0624	26.6976	26.8268	25.2905	25.2508	24.7089	782920	517470	709190	63525	41282	36314	18	2.92717	1.77887	Q13315;A0A024R3C7;Q68DE6;B4DSP3;E9PIN0;E9PRG7;Q6P7P1;M0QXY8;E9PIQ5;A0A087X0E9;Q59GH6;E2I6F3	Q13315;A0A024R3C7	Serine-protein kinase ATM	ATM
28.8379	28.2737	27.3501	27.0954	23.7676	28.3081	3046400	24598000	1183300	457420	249240	573150	10	0.547408	1.76355	P38606;B7Z2V6;C9JA17;C9JVW8	P38606;B7Z2V6	V-type proton ATPase catalytic subunit A	ATP6V1A
26.3247	26.4006	26.6499	25.6245	25.6572	22.8033	5672600	4256800	3675400	549390	363660	0	6	0.862299	1.76338	P07199;Q71VN3;Q71VN4	P07199	Major centromere autoantigen B	CENPB
25.222	25.0059	25.2721	23.8752	23.0487	23.3084	1843500	1303300	1281300	95244	62394	56662	8	2.61767	1.75589	Q8IV32	Q8IV32	Coiled-coil domain-containing protein 71	CCDC71
24.8913	24.846	24.9246	23.0822	23.5831	22.7424	269770	319480	446710	0	0	0	7	2.69174	1.75141	Q5YLB2;A0A024R1V8;A0A024R1Y1;Q3LRH8;A0A024R1W0;Q5XLT4;P38398;G8I0D8;A0A024R1Y0;E9PH68;E7EWN5;Q05BZ9;A0A0U1RRA9;Q3B891;Q7Z606;E7ENB7;E7EQW4;A0A0A0MSN1;Q6P671;E7EUM2;Q5U3B7;G3XAC3;A0A024R1V7;A0A024R1Z8;A0A024R1V0;E9PC22;C9IZW4;Q3B890;A0A068BI53;G1UI37;Q92897;A0A0N9E014;A0A068BCB6;A0A0U4JQJ0;A0A068BI42;A0A068BI55;A0A068BI38;A0A068BDT6;A0A0F7G9S0;Q4EW25;A0A0A1ESW9;A0A0K0PUK0;H0Y8D8;B7ZA85;B4DES0	Q5YLB2;A0A024R1V8;A0A024R1Y1;Q3LRH8;A0A024R1W0;Q5XLT4;P38398;G8I0D8;A0A024R1Y0;E9PH68;E7EWN5;Q05BZ9;A0A0U1RRA9;Q3B891;Q7Z606	Breast cancer type 1 susceptibility protein	BRCA1
27.1802	27.926	27.663	26.7643	25.2349	25.5284	3697500	4441200	3084400	632620	299320	174870	21	1.55593	1.7472	Q5T5X7	Q5T5X7	BEN domain-containing protein 3	BEND3
30.3961	30.5855	30.4194	29.3201	28.6548	28.2277	22104000	16153000	16857000	2875000	1151300	1240900	49	2.2326	1.7328	Q5VZL5;H7C1I7	Q5VZL5;H7C1I7	Zinc finger MYM-type protein 4	ZMYM4
30.685	30.6572	30.336	28.944	28.8875	28.6681	28145000	19783000	16498000	1764500	1314900	1082700	58	3.60344	1.72617	Q6PL18;A0A024R9G7;A0A0B4J211	Q6PL18;A0A024R9G7;A0A0B4J211	ATPase family AAA domain-containing protein 2	ATAD2
26.0114	26.2923	26.2966	25.7453	22.3011	25.5217	2791400	2597100	3525900	1010500	0	624150	2	0.683053	1.67743	Q70L73	Q70L73		MKI67
24.8484	25.1684	25.5559	23.864	23.3945	23.3234	1218300	1130600	1321400	63822	72715	0	4	2.47897	1.66362	Q9H9F9	Q9H9F9	Actin-related protein 5	ACTR5
25.4919	25.5671	25.6272	22.978	24.2353	24.5382	323330	539650	386350	13346	47064	0	9	1.57704	1.64491	W5ZR30;Q9UGU0;A9JX13	W5ZR30;Q9UGU0	Transcription factor 20	TCF20
25.9644	25.9611	26.0682	25.8479	24.1185	23.154	2248600	2041400	1926000	738800	485960	356580	7	0.964418	1.62444	Q9UNQ0;I7JB59;A0A024RDD4;Q8WZ76;I4EPX2;F8S0F7;F8S0F6;F8S0F2;H0YAF3;H0YAF1	Q9UNQ0;I7JB59;A0A024RDD4	ATP-binding cassette sub-family G member 2	ABCG2
26.1189	27.0551	26.3898	25.9472	25.478	23.2665	2792000	2279400	2161300	311990	164510	100320	11	0.866321	1.62403	Q13111;D6W625;K7EJF1	Q13111;D6W625	Chromatin assembly factor 1 subunit A	CHAF1A
26.043	25.9818	26.0141	25.8075	23.7463	23.7778	3702600	2609000	3144500	1413900	850600	374180	3	1.08142	1.56912	P53007;Q6LAP8;D9HTE9;B4DP62	P53007;Q6LAP8;D9HTE9	Tricarboxylate transport protein, mitochondrial	SLC25A1
27.4367	27.6869	26.8382	25.9308	25.0468	26.2944	2049800	1144600	1109000	203190	66832	156190	20	1.59993	1.56325	P12270;Q58F23;Q504U6;A0PJC9;Q9UE33;Q5SWX9	P12270;Q58F23;Q504U6;A0PJC9	Nucleoprotein TPR	TPR
31.4603	24.9196	22.289	24.2873	25.027	24.6823	134910000	1556700	742950	327470	595150	668380	0	0.222211	1.55742	Q5K634	Q5K634
25.2467	25.4963	25.6925	25.0464	23.467	23.2527	3822100	2574800	2345400	746020	323530	0	4	1.25924	1.55652	Q05CM9;O75475;Q8N4N4	Q05CM9;O75475	PC4 and SFRS1-interacting protein	PSIP1
25.0135	25.27	24.6818	24.6878	23.0927	22.5253	511460	417470	319040	24296	0	14315	6	1.09098	1.55313	A0A075B6Q3;Q5H9F3;Q86YA6;Q9HAM3;H7C4B2	A0A075B6Q3;Q5H9F3;Q86YA6	BCL-6 corepressor-like protein 1	BCORL1
25.318	25.4889	25.602	24.0168	24.0894	23.6609	1176200	858620	863130	58546	34997	20720	7	3.23632	1.54729	Q9UEG4	Q9UEG4	Zinc finger protein 629	ZNF629
24.96	24.878	24.8013	24.6055	21.994	23.398	432040	317740	317040	0	0	0	6	0.958192	1.54728	Q9ULI0;C9JG15;H7BYF1;C9J1G9	Q9ULI0	ATPase family AAA domain-containing protein 2B	ATAD2B
29.4542	29.8208	29.6884	29.3388	27.5004	27.4842	11216000	10969000	10281000	4337200	756960	963390	36	1.16409	1.54666	Q9UBW7;A0A024RDS3;A8K126;B4DZH0;A0A087X151	Q9UBW7;A0A024RDS3;A8K126;B4DZH0	Zinc finger MYM-type protein 2	ZMYM2
27.1408	27.4943	27.3742	26.0878	26.2076	25.0769	7913300	4848500	5799200	1167700	665950	266130	11	1.84253	1.54572	Q96GN5;A0A024RA51;A8K8X5;C9IZR6;C9JFL7;C9J8L0	Q96GN5;A0A024RA51;A8K8X5	Cell division cycle-associated 7-like protein	CDCA7L
25.8268	26.0638	26.1223	25.4036	25.1185	22.9254	2500800	1850100	1781300	237180	137210	47988	9	0.900765	1.52182	Q2TB10;B7Z4V7;C9JHX9;Q49A13;A0A087WXB4;Q4G0T8;C9JLY3;C9K0M9	Q2TB10;B7Z4V7	Zinc finger protein 800	ZNF800
25.7007	25.832	25.4487	23.0298	23.6206	25.8074	5022400	2408400	2931500	849900	793830	975270	5	0.819407	1.50788	Q3ZCQ8;Q0VAB1;A0A024R0M6;M0R0C3;M0R2F8;M0R003;M0QXC3;M0R2Z3;M0R303;M0R2D2;M0R1Y4	Q3ZCQ8;Q0VAB1;A0A024R0M6;M0R0C3;M0R2F8	Mitochondrial import inner membrane translocase subunit TIM50	TIMM50
25.0685	25.2758	25.3586	23.0985	24.267	23.8276	3157700	1698600	1844100	328420	306220	236960	4	1.89003	1.50324	B4E1N7;P01106;A0A024R9L7;H0YBT0;A0A087WVR4;A0A087WUS5;Q6LBK7;B3CJE0;B3CJD8;B3CJD7;B3CJD2;B3CJC8;B3CJC7;B3CJC6;B3CJB9;B3CJB3;B3CJA9;B3CJA7;B3CJA4;B3CJA3;B3CJ92;B3CJ90;B3CJ88;B3CJ86;B3CJ81;B3CJ74;B3CJ73;B3CJ72;B3CJ65;B0B0N9;A0A0B4J1R1;H0YBG3;A0N2G3;B3CJB2;B3CJA8;B3CJ93;B3CJ78;B3CJ66;B3CJ63;B3CJB0;B3CJ76;B3CJD6;B3CJ71;B3CJD9;B3CJD3;B3CJD1;B3CJC0;B3CJB8;B3CJA1;B3CJ91;B3CJ89;B3CJ87;B3CJ82;B3CJ75;B3CJ6…	B4E1N7;P01106;A0A024R9L7;H0YBT0;A0A087WVR4;A0A087WUS5;Q6LBK7;B3CJE0;B3CJD8;B3CJD7;B3CJD2;B3CJC8;B3CJC7;B3CJC6;B3CJB9;B3CJB3;B3CJA9;B3CJA7;B3CJA4;B3CJA3;B3CJ92;B3CJ90;B3CJ88;B3CJ86;B3CJ81;B3CJ74;B3CJ73;B3CJ72;B3CJ65;B0B0N9;A0A0B4J1R1	Myc proto-oncogene protein	MYC;c-myc
25.4959	25.7866	25.7723	24.0972	22.7361	25.7393	697100	775740	803910	237630	183510	346120	8	0.789665	1.49407	Q9Y5B9;Q0VGA3;G3V5A4;G3V401;G3V2X0	Q9Y5B9;Q0VGA3	FACT complex subunit SPT16	SUPT16H
29.1116	22.9267	23.1068	23.2345	24.213	23.2444	1342900	49613	33988	26787	16184	27857	50	0.291883	1.48441	Q09666;B4DTV0;Q6ZQN2;Q8N274;Q13727;E9PQE3;E9PJZ0;E9PKR9;E9PJC6;E9PLK4;Q96EC4;Q9BVU3	Q09666	Neuroblast differentiation-associated protein AHNAK	AHNAK
25.0673	25.2666	24.9435	23.5993	23.7823	23.4549	1779400	1445500	1221200	111960	59332	0	3	3.4242	1.48028	A0A0C4DGR5;Q96IT1;A0A024R5Q5	A0A0C4DGR5;Q96IT1;A0A024R5Q5	Zinc finger protein 496	ZNF496
30.13	30.4141	30.1632	29.4514	28.5045	28.3213	20736000	18525000	17140000	3845100	1279200	1186300	32	1.82285	1.47667	Q14202;A6NHB5;A6NHN7;A8K3Z7;A6NL54	Q14202;A6NHB5;A6NHN7	Zinc finger MYM-type protein 3	ZMYM3
24.9222	25.3128	24.8111	23.3818	23.592	23.6487	2593300	2098500	1394500	572630	603380	487110	3	2.98849	1.47457	Q5TB53;Q96JZ5;Q9HD45;A0A024QYS2;Q8WUB5	Q5TB53;Q96JZ5;Q9HD45;A0A024QYS2	Transmembrane 9 superfamily member 3	TM9SF3;SMBP
24.236	25.144	24.9395	23.5133	23.5325	22.8738	929760	1787300	1158900	238340	0	129980	2	1.86026	1.46663	Q969Z3	Q969Z3	MOSC domain-containing protein 2, mitochondrial	MARC2
30.9149	24.483	24.4674	25.0846	25.1041	25.2797	296720000	4769500	4846400	6044800	4595900	5566100	0	0.273759	1.46561	P35325;P35326;Q15515	P35325;P35326	Small proline-rich protein 2B;Small proline-rich protein 2A	SPRR2B;SPRR2A
26.6425	26.9676	27.2503	25.2062	25.5788	25.6839	1415900	1223300	1701800	127750	98529	120790	20	2.52145	1.46386	Q86U86;E7EVG2;H0Y5B5;Q9NUX9;Q5EBM5;Q6IRX1;C9JCJ2;C9J053;C9JQF1;C9JPI5;Q9NVM2	Q86U86;E7EVG2;H0Y5B5	Protein polybromo-1	PBRM1
25.6024	25.1803	25.211	24.4975	22.9474	24.2084	3099500	1444200	1855800	352510	243780	306130	5	1.36547	1.44678	P04899;B3KX51;Q96C71;B3KP24;Q93020;Q6LCB5;P11488;A0A024R2Z1;Q5T697;P19087;A8MTJ3;P09471;B3KP89;A0A142CHG9;A0A1W2PRE1;A2A2R6;A0A1W2PQK2;A0A087WTB6;A0A1W2PRJ7;A0A087WZE5;A0A1W2PS82;H3BTM2;A0A1W2PP38;Q8N6I9	P04899;B3KX51;Q96C71;B3KP24;Q93020	Guanine nucleotide-binding protein G(i) subunit alpha-2	GNAI2;WUGSC:H_LUCA16.1
24.9819	24.4408	24.1997	23.8609	22.6914	22.7564	1096500	565340	587700	129340	69964	104280	4	1.49753	1.43789	A0A024R3J7;P46977;A0A0C4DH80;E9PN73;E9PI32	A0A024R3J7;P46977	Dolichyl-diphosphooligosaccharide--protein glycosyltransferase subunit STT3A	STT3A
26.5518	27.4126	26.6245	25.7386	24.9416	25.6079	3376800	4532200	1495400	363480	169900	325110	16	1.74676	1.43361	Q9NS39;Q5VW43;Q86X17;A4VCH5;A8K1I0	Q9NS39	Double-stranded RNA-specific editase B2	ADARB2
26.2863	25.1049	25.3513	24.7782	22.68	25.0154	6327200	1852400	2067500	509730	87239	263580	6	0.797118	1.42299	Q6I9T8;P67775;B3KUN1;B3KQ51;Q8WZ56;Q5U0I7;P62714;B3KRM2;A0A140VJS0;H0YC23;E5RFI3;E5RHP4;E7ESG8;E5RHC1;H3BV22;H3BTA2;Q5U086;P60510;A0A024R625;H0YBN9;E5RI56	Q6I9T8;P67775;B3KUN1;B3KQ51;Q8WZ56;Q5U0I7;P62714;B3KRM2;A0A140VJS0	Serine/threonine-protein phosphatase;Serine/threonine-protein phosphatase 2A catalytic subunit alpha isoform;Serine/threonine-protein phosphatase 2A catalytic subunit beta isoform	PPP2CA;PPP2CB
26.606	26.7079	26.4045	26.2686	23.1079	26.0935	22330000	15874000	13909000	4964100	2675700	3962500	4	0.618083	1.41618	P07305	P07305	Histone H1.0;Histone H1.0, N-terminally processed	H1F0
24.9243	24.9979	25.0064	24.2909	22.8557	23.5824	1426100	1067000	1132000	288600	0	0	3	1.55294	1.39986	I6L9F1;Q9BQI6;B4DR33	I6L9F1;Q9BQI6;B4DR33	Ankyrin repeat domain-containing protein 32	ANKRD32
28.6816	29.0716	28.734	27.5165	27.3295	27.4479	4151800	3591400	2901600	429220	203850	270280	39	3.32324	1.39777	Q6KC79;Q6IEH8;A8K2T2;A6QL62;A2RRA7	Q6KC79;Q6IEH8	Nipped-B-like protein	NIPBL
28.6987	28.187	28.0116	27.5572	28.1844	24.9712	17316000	885890	859620	324580	275170	30834	7	0.624572	1.39483	Q9ULK4;Q5JWT2;B4E3G4;B9TX49;B9TX51;B9TX50;B9TX53;B9TX52	Q9ULK4;Q5JWT2;B4E3G4	Mediator of RNA polymerase II transcription subunit 23	MED23
29.597	29.5558	29.4511	28.5114	27.6777	28.2307	14075000	11081000	13193000	2004400	805600	1175300	29	2.30388	1.3947	Q7Z3K3;B4DSK8;H0YCT3;M0R2X2;H7C238;A6PW30;E9PJY9;E9PIR8	Q7Z3K3;B4DSK8	Pogo transposable element with ZNF domain	POGZ
29.0578	29.2242	28.9053	28.0617	27.7222	27.2318	8187400	5520700	7067300	1334200	817360	350240	30	2.24246	1.39058	O96028;Q05CW4;D6R9V2;H0Y9L4;D6RIS1;H0Y9U6	O96028	Histone-lysine N-methyltransferase NSD2	WHSC1
24.4344	25.0122	24.7823	23.2691	22.5261	24.2717	435360	425920	578680	81916	0	41001	4	1.223	1.38734	O75151	O75151	Lysine-specific demethylase PHF2	PHF2
25.0437	25.323	25.234	22.6375	24.9266	23.8845	905170	850670	801850	64130	138820	0	5	0.972461	1.38403	Q6PCB5;H7C2D3;C9JM20	Q6PCB5;H7C2D3;C9JM20	Round spermatid basic protein 1-like protein	RSBN1L
26.4203	26.7087	26.4451	25.3474	25.2491	24.8355	897220	812900	900590	160990	76419	60255	14	2.79105	1.38073	Q6W2J9;H9A532;E3UVQ2;H7BYY2;H7BZ37;H7C2V9;A6NE70;B3KTC2;H7C231;A1A564	Q6W2J9;H9A532;E3UVQ2;H7BYY2	BCL-6 corepressor	BCOR;BCOR-RARA
25.2609	25.7383	25.5324	23.0311	23.5412	25.8349	4860200	4296700	4786400	1123800	722680	1602900	3	0.720052	1.37482	A0A1B0GTC1;A0A1B0GW37;U3KQE8;Q5VW28;O00712;A0A1B0GVN4;A0A1B0GWJ4;A0A0A0MRX8;A0A1B0GU97;A0A1B0GWI9;Q5VW27;Q5VW30;Q5VW26;U3KPY9;A0A087WXP2;Q5W0Y9;A0A0S2Z4H3;B4DS74;A0A1B0GWB8	A0A1B0GTC1;A0A1B0GW37;U3KQE8;Q5VW28;O00712;A0A1B0GVN4;A0A1B0GWJ4;A0A0A0MRX8;A0A1B0GU97;A0A1B0GWI9;Q5VW27;Q5VW30;Q5VW26;U3KPY9;A0A087WXP2;Q5W0Y9;A0A0S2Z4H3;B4DS74	Nuclear factor 1;Nuclear factor 1 B-type	NFIB
27.9613	28.0611	27.8295	27.1261	26.5793	26.0293	1135600	761710	689730	130190	72778	56073	41	1.87749	1.37239	Q9NU22;Q5T795;Q6ZVV6;Q6AI22	Q9NU22	Midasin	MDN1
28.9899	29.3111	28.7971	27.9633	27.91	27.1148	8877200	7300200	6358200	1148500	762000	564120	33	1.92586	1.36999	J3QK86;J3KPG5;F8VU39;Q9UIF9;A0A0C4DGI9;H0YII3;H0YHL2;H0YHQ7	J3QK86;J3KPG5;F8VU39;Q9UIF9;A0A0C4DGI9	Bromodomain adjacent to zinc finger domain protein 2A	BAZ2A
24.226	24.3293	24.7571	22.5025	23.3964	23.3187	811720	547320	919580	52916	53055	0	3	1.84596	1.36497	A0A024R5E8;Q92993;B2R8A7;A0A024R597;E9PJI1;Q59EJ8;E9PMG8;E9PRM3;E9PRL6	A0A024R5E8;Q92993;B2R8A7;A0A024R597;E9PJI1;Q59EJ8	Histone acetyltransferase KAT5	KAT5
25.1152	23.6835	23.3231	22.5461	22.5912	22.9192	2558600	388290	516800	114630	62853	328190	4	1.13841	1.35506	B4DEX8;P31153;A0A140VJP5;B4DFQ8;B4E1K2;B4DN74;Q00266;A8K455	B4DEX8;P31153;A0A140VJP5	S-adenosylmethionine synthase;S-adenosylmethionine synthase isoform type-2	MAT2A
25.6684	25.7403	25.5401	24.1621	24.9808	23.7502	1582700	1122800	1180100	50329	127930	68992	10	1.67741	1.35188	A0PJ70;Q8TF76;A8K9K0	A0PJ70;Q8TF76;A8K9K0	Serine/threonine-protein kinase haspin	GSG2
25.5184	25.9319	26.0679	25.1543	25.4716	22.8455	3686900	3382300	4212700	1005000	993550	302630	2	0.732363	1.34889	Q32NC0;L7N2F3;A0A087X0E7;W4VSQ2;Q8TBS0	Q32NC0;L7N2F3;A0A087X0E7;W4VSQ2;Q8TBS0	UPF0711 protein C18orf21	C18orf21
24.5697	24.1727	24.2536	23.6315	22.1052	23.2323	1919200	976100	744220	183700	38750	66386	3	1.32878	1.34233	Q8TBT6;P08574	Q8TBT6;P08574	Cytochrome c1, heme protein, mitochondrial	CYC1
24.4023	24.7672	24.3897	23.5099	22.7367	23.2898	845020	899190	927500	74185	0	0	4	2.16622	1.34092	B4DS70;P52737;A8K5C7;Q6RFS2	B4DS70;P52737;A8K5C7	Zinc finger protein 136	ZNF136
25.4194	25.6248	25.6164	25.2222	24.6967	22.7451	1840800	1532100	1472200	368530	190800	108880	7	0.815146	1.33219	Q15646;B3KN79;H0YGP3	Q15646;B3KN79	2-5-oligoadenylate synthase-like protein	OASL
27.0438	27.3191	27.1822	26.1405	25.6248	25.7947	2405500	2254600	2611400	456520	233060	282980	16	2.82721	1.32841	O95696;A0A024R4W4;A0A024R4V5;Q86X06;B4DZ41;B7Z926;Q9Y4Q3;B4E3L9;B4DZC2;Q59G93;J3KQ61;Q5CZ83;A8WI62;A8WI61;H0Y7B4;Q8N4T7;F6XDC4;E9PSF3;E9PI60;A0A024RCX0;Q9ULD4	O95696;A0A024R4W4;A0A024R4V5;Q86X06;B4DZ41;B7Z926;Q9Y4Q3;B4E3L9;B4DZC2;Q59G93;J3KQ61	Bromodomain-containing protein 1	BRD1;DKFZp434B094
27.449	27.1604	27.0111	26.4911	25.5294	25.6306	2294100	1546300	1654300	488780	83190	154830	17	1.791	1.32312	Q29RF7;G1UI16;B3KMN2;Q96DB6;H0Y9L6	Q29RF7;G1UI16	Sister chromatid cohesion protein PDS5 homolog A	PDS5A
24.0287	24.3686	24.3408	22.6791	22.7646	23.3398	1195200	1283200	1555700	0	152750	229170	2	2.30882	1.31822	A0A075BPP5;E1B2J3;P51608;E9LUH3;D9ZNA4;D5L9I5;D3YJ43;D0UU70;A8K079;A0A140VKC4;E9LUH4;A0A087WVW7;I6LM39;D6QZ43;A0A087X1U4;C6KG44;C6KG45	A0A075BPP5;E1B2J3;P51608;E9LUH3;D9ZNA4;D5L9I5;D3YJ43;D0UU70;A8K079;A0A140VKC4;E9LUH4;A0A087WVW7;I6LM39;D6QZ43;A0A087X1U4;C6KG44;C6KG45	Methyl-CpG-binding protein 2	MECP2
25.0427	25.1899	24.6438	23.5605	23.4642	23.9474	2080400	1459400	627860	0	102380	60504	4	2.38811	1.30144	Q14592;A8K7X9	Q14592;A8K7X9	Zinc finger protein 460	ZNF460
26.984	27.0572	27.1552	26.8375	26.7529	23.7175	11290000	3662700	12499000	1149500	2910300	758830	6	0.55966	1.29619	Q9NQT5;Q9NYS3	Q9NQT5;Q9NYS3	Exosome complex component RRP40	EXOSC3;PNAS-3
29.2053	29.3219	29.0667	27.95	28.1231	27.6479	5647200	5533700	4771500	553340	432950	335130	33	2.92107	1.29097	Q5UIP0;H7C2B5;B4DRJ4;H7BZN3;B4DS49	Q5UIP0	Telomere-associated protein RIF1	RIF1
26.4018	25.1976	25.1652	25.0515	23.892	23.9532	4046500	1112800	1110900	417030	100930	72055	9	1.09323	1.28932	P21281;A0A140VK65;Q59HF3;H0YC04;Q71UA2;B4DWH7;C9JL73;P15313;B4DFM5;E5RGH6;C9J5E3;C9JNS9;B4DQI9;H0YAT8	P21281;A0A140VK65;Q59HF3;H0YC04	V-type proton ATPase subunit B, brain isoform	ATP6V1B2
33.4992	33.6307	33.3444	32.3507	32.295	31.9696	79599000	61551000	53390000	8332500	5513700	4380000	182	3.05205	1.28635	P46013;B4DRH3;Q70L74;Q70L72	P46013	Antigen KI-67	MKI67
24.6286	25.1241	24.4081	23.1321	23.6441	23.5416	1621900	1570800	1133900	0	94071	0	4	2.0842	1.28101	B4DM13;Q9BWT1;D3DPD9	B4DM13;Q9BWT1	Cell division cycle-associated protein 7	CDCA7
25.0478	24.6441	24.6262	24.2236	23.3635	22.9192	1206700	843210	732660	215310	66608	79688	4	1.45069	1.27058	B4DKY9;Q9HC62;B4E2S4;H7C1A0;B4DKW6;C9IYB7	B4DKY9;Q9HC62;B4E2S4;H7C1A0;B4DKW6	Sentrin-specific protease 2	SENP2
25.2342	25.8677	25.351	24.7943	24.0227	23.8294	171670	151950	167520	68878	34495	39348	2	1.63989	1.26888	E9PG32;J3QTM1;Q6ZR08	E9PG32;J3QTM1;Q6ZR08	Dynein heavy chain 12, axonemal	DNAH12
25.2507	25.31	24.4554	23.855	23.9324	23.4274	976550	910530	631230	0	0	52145	3	1.79081	1.26709	A8CG34;A0A075B7F8	A8CG34;A0A075B7F8	Nuclear envelope pore membrane protein POM 121C	POM121C
24.9249	25.3134	25.7882	24.8931	23.8934	23.4433	1511700	913130	1779900	417120	127860	0	4	1.19959	1.26558	Q13112;B2R7X3	Q13112;B2R7X3	Chromatin assembly factor 1 subunit B	CHAF1B
25.9371	25.9871	25.3157	25.1307	25.1867	23.1633	1587700	767040	4230300	136690	98341	0	6	0.830568	1.25306	G3V167;Q9UGN5;A8K214;B4DV82;H0YH02	G3V167;Q9UGN5;A8K214;B4DV82;H0YH02	Poly [ADP-ribose] polymerase 2	PARP2
25.0706	24.9025	25.0889	24.5686	23.4911	23.2989	1285100	962620	1148400	150650	89349	57018	4	1.43671	1.23448	Q14781	Q14781	Chromobox protein homolog 2	CBX2
29.2622	29.2001	29.0747	27.9325	28.034	27.8905	125300000	59500000	67195000	9359100	11484000	11296000	8	4.21381	1.22667	Q13185;A4D177;S4R2Y4;C9JMM0;B8ZZ43;K7ELA4;B5MD17	Q13185;A4D177;S4R2Y4	Chromobox protein homolog 3	CBX3
25.6558	25.9678	25.6828	25.4147	25.3023	22.9136	874760	852750	841850	159920	129170	104500	10	0.677396	1.22526	Q96SB8;C9JMN1;A0A0A0MRY1;C9JEF0;A0A087WWI9	Q96SB8;C9JMN1	Structural maintenance of chromosomes protein 6	SMC6
24.8125	25.1915	24.8428	24.7302	23.3914	23.0852	592120	504450	444950	103350	0	0	5	1.09811	1.21334	Q96HA7;Q59GI3;A0A087X1F6	Q96HA7	Tonsoku-like protein	TONSL
25.2598	25.55	25.4417	23.5362	24.863	24.2519	3381400	3542700	3978800	372690	417830	177110	4	1.4226	1.20012	B4DPY0;E7ETY7;Q8TED1	B4DPY0;E7ETY7;Q8TED1	Glutathione peroxidase;Probable glutathione peroxidase 8	GPX8
25.1749	25.4759	25.7111	25.0646	22.3607	25.3404	708680	939080	953210	170120	0	170770	8	0.55091	1.19869	O15294;Q548W1;B4DTL6	O15294;Q548W1	UDP-N-acetylglucosamine--peptide N-acetylglucosaminyltransferase 110 kDa subunit	OGT
26.7748	27.1144	26.8955	25.9685	25.9523	25.2933	1847500	1408300	1182200	233070	181580	96900	13	2.0901	1.19018	Q9ULM3;Q9H8R0;Q8N5H6;H0Y6M6	Q9ULM3	YEATS domain-containing protein 2	YEATS2
26.4464	25.9637	25.8222	25.8259	23.2675	25.5728	9865500	2556700	2377400	1165700	517830	974380	4	0.642206	1.18866	Q8NEJ9;H0YJ17;G3V4G1	Q8NEJ9;H0YJ17	Neuroguidin	NGDN
24.7645	24.4324	24.0283	23.2726	21.9429	24.4451	797300	606700	649230	79175	34274	155530	4	0.721371	1.18818	Q12797	Q12797	Aspartyl/asparaginyl beta-hydroxylase	ASPH
29.6372	29.7501	29.4515	28.5589	28.4486	28.2667	19233000	14513000	12731000	2355000	1430800	1250300	34	3.20864	1.18817	O95235;D6R9E4;D6RBN1	O95235	Kinesin-like protein KIF20A	KIF20A
27.2343	27.5564	27.456	26.4711	26.2546	25.9746	2539700	2204100	1937300	461260	202060	169890	16	2.62605	1.18216	Q9BZ95;E9PKA2;H0YE68	Q9BZ95	Histone-lysine N-methyltransferase NSD3	WHSC1L1
24.9907	25.3812	25.6362	24.1163	23.3846	24.968	3443100	3561700	4710800	0	580120	988120	3	1.12185	1.17973	Q8N6S5;B3KMZ5	Q8N6S5;B3KMZ5	ADP-ribosylation factor-like protein 6-interacting protein 6	ARL6IP6
24.6888	25.2514	24.7564	22.435	24.209	24.5183	14223000	13247000	11471000	6111200	0	0	1	0.810069	1.17807	P62273	P62273	40S ribosomal protein S29	RPS29
24.4363	25.0442	24.2148	23.5376	23.2514	23.3875	605210	759740	831980	0	58174	0	5	1.96168	1.17291	Q86Y97;A0A0D9SF94	Q86Y97	Histone-lysine N-methyltransferase SUV420H2	SUV420H2
30.8547	31.0262	30.891	29.9713	29.7907	29.5194	46668000	37255000	46164000	8560900	5169700	4521100	43	2.92569	1.16349	Q9ULW0;Q643R0;B3KM90;Q96FC3	Q9ULW0;Q643R0;B3KM90	Targeting protein for Xklp2	TPX2;HCTP4
24.4854	24.3673	24.8048	22.512	24.073	23.5898	545510	460140	595690	29852	0	0	5	1.13847	1.16089	Q8IYH5	Q8IYH5	ZZ-type zinc finger-containing protein 3	ZZZ3
27.3064	27.6649	27.3972	26.5159	26.5392	25.8331	2671100	2433200	2211300	510410	301460	203820	22	1.97994	1.16013	H0YNU5;P54132;B2RAN0;B7ZKN7;B7Z2X2;Q3B7X0;H0YLV8;B7Z8C1	H0YNU5;P54132;B2RAN0;B7ZKN7;B7Z2X2	Bloom syndrome protein	BLM
24.4484	24.2393	24.4927	23.2527	22.8552	23.5934	739880	566810	581410	0	0	0	4	2.15736	1.15971	C9JWC4;Q8NCD3;H7C3V8	C9JWC4;Q8NCD3;H7C3V8	Holliday junction recognition protein	HJURP
28.0508	28.1697	28.0809	27.0039	27.0083	26.811	7131800	5084400	4948200	685810	597700	658550	18	4.00934	1.15939	Q96F82;Q13415;B7Z8H0;A8K794	Q96F82;Q13415;B7Z8H0;A8K794	Origin recognition complex subunit 1	ORC1L;ORC1
26.1756	26.5595	26.6675	25.3588	25.4629	25.1416	2140000	1899100	2294700	342200	225390	170370	11	2.53577	1.1464	Q9UQR0;B4DZR9;B4DRC2;H0Y6S1	Q9UQR0;B4DZR9;B4DRC2	Sex comb on midleg-like protein 2	SCML2
24.4555	24.528	24.2476	23.3273	24.3996	22.0695	225280	346370	303000	37856	54834	37900	3	0.777662	1.14486	Q9BXW9;A0A024R2G2;H7BZJ7;F8WE37	Q9BXW9;A0A024R2G2;H7BZJ7	Fanconi anemia group D2 protein	FANCD2
24.4105	24.8309	24.542	23.4852	22.6547	24.2254	1474200	1404600	616450	208320	191520	183210	3	1.13913	1.13935	R4GMT0;B4DM97;P61163;B4DMT4;B4DXP9;A0A1B0GVS3;Q13841;P42025	R4GMT0;B4DM97;P61163;B4DMT4;B4DXP9	Alpha-centractin	ACTR1A
24.6869	24.5006	24.3363	23.5659	24.1841	22.3595	2502400	1311700	1703900	380170	0	215200	3	0.978152	1.1381	Q9BSM1	Q9BSM1	Polycomb group RING finger protein 1	PCGF1
25.8278	26.6455	26.7966	25.9934	25.8419	24.0295	427760	683580	632890	136200	137850	112080	7	0.745366	1.13504	O95071;E7EMW7;H0YBB4;H0YAV7	O95071;E7EMW7	E3 ubiquitin-protein ligase UBR5	UBR5
26.2462	25.6323	25.1878	25.2833	24.3979	23.982	2781800	1136500	898140	552300	173390	577680	3	1.08545	1.13439	Q8NC56;A0A024RCZ1;H7C2Z0;H0Y9B7	Q8NC56;A0A024RCZ1;H7C2Z0	LEM domain-containing protein 2	LEMD2
25.7264	25.5406	25.3327	23.9177	25.1137	24.1821	1320400	896220	601640	0	97737	65088	10	1.38537	1.12875	Q03188;H0Y8J2;H0Y9W1	Q03188;H0Y8J2	Centromere protein C 1	CENPC1
25.298	25.1327	24.9355	24.9153	24.2379	22.8289	2095500	934250	955610	216230	45209	0	5	0.839769	1.12802	B2RCW0;Q13042;A0A024RDZ2;Q5T8C6;B4DK74	B2RCW0;Q13042;A0A024RDZ2;Q5T8C6	Cell division cycle protein 16 homolog	CDC16
30.4466	30.6777	30.46	29.2278	29.5888	29.4099	60176000	54226000	48984000	9686300	7631900	7833900	26	3.02141	1.1193	Q5SSJ5;B0QZK4;X6RGJ2;Q5SWC8;B4E0N8;B0QZK9;B0QZK8	Q5SSJ5;B0QZK4;X6RGJ2;Q5SWC8	Heterochromatin protein 1-binding protein 3	HP1BP3
26.6388	27.0979	26.8309	26.4362	26.0008	24.7849	944260	674340	854120	319850	110700	54249	19	1.02309	1.1152	Q8NG31;E9PPJ1;H0YCZ2;Q05C46;H0YEY7	Q8NG31;E9PPJ1;H0YCZ2	Protein CASC5	CASC5
26.5722	26.8638	26.3893	26.0302	25.7925	24.6698	671000	619450	635070	165290	103880	37788	12	1.1825	1.11092	Q13535;H0Y8Y6;H0Y9K2;H0Y8R8	Q13535	Serine/threonine-protein kinase ATR	ATR
24.6293	24.5221	24.6333	22.9916	23.5251	23.9399	906250	266170	447590	43141	69838	50026	5	1.79484	1.10939	B4E272;Q86XK2;B4DMF8;H0YAV3;C9IYF0;B3KUR1	B4E272;Q86XK2;B4DMF8;H0YAV3	F-box only protein 11	FBXO11
25.265	25.5405	25.449	25.2891	23.4804	24.2279	1314700	1044000	794600	248470	0	27172	6	0.957249	1.08569	B2RMQ4;Q8WWK9;C9J7Y4	B2RMQ4;Q8WWK9	Cytoskeleton-associated protein 2	CKAP2
31.0736	31.3395	31.1215	30.2755	29.9694	30.0484	31110000	25983000	27784000	5486300	2982800	3384000	62	3.03399	1.08043	Q9UIG0	Q9UIG0	Tyrosine-protein kinase BAZ1B	BAZ1B
24.2458	24.0414	24.531	22.3743	23.8073	23.4454	881890	601950	930430	89291	0	0	3	1.10402	1.0637	A0A0U1RQJ8;A0A024R307;Q8WXE1;A0A024R2U4;A0A0U1RQW3	A0A0U1RQJ8;A0A024R307;Q8WXE1;A0A024R2U4;A0A0U1RQW3	ATR-interacting protein	ATRIP
25.407	26.1502	26.3526	25.3191	24.9464	24.4692	560970	567300	734510	97566	60966	42573	12	1.31032	1.05834	B4DYQ3;Q93074;Q7Z3Z5;H7C191;Q7Z2E0	B4DYQ3;Q93074;Q7Z3Z5	Mediator of RNA polymerase II transcription subunit 12	MED12
30.6716	30.9091	30.6721	29.7306	29.8635	29.5157	51963000	45193000	45586000	7524000	5794500	4384100	30	2.90918	1.0477	Q5QJE6;J3KP30;B7Z854;E9PRB3	Q5QJE6;J3KP30;B7Z854	Deoxynucleotidyltransferase terminal-interacting protein 2	DNTTIP2
27.1622	27.3135	27.4822	26.6151	26.3519	25.8651	6005700	4012600	5178700	1307100	716500	289030	13	1.92249	1.04192	Q05DU1;Q9NVN8;A0A024R9Y6	Q05DU1;Q9NVN8;A0A024R9Y6	Guanine nucleotide-binding protein-like 3-like protein	GNL3L
24.5163	24.6512	24.5877	24.7417	22.6726	23.2301	1497100	1022600	1097800	619000	140300	132660	2	0.771091	1.03693	Q6UXN9;A0A024R333	Q6UXN9;A0A024R333	WD repeat-containing protein 82	WDR82
29.5139	29.4739	29.4066	28.2421	28.543	28.5281	89966000	59666000	61417000	7827700	8387400	10350000	10	3.2489	1.02708	V9HWG0;P45973;Q6I9T7;F8VNY3	V9HWG0;P45973;Q6I9T7	Chromobox protein homolog 5	CBX5
26.2388	26.4073	26.7209	25.4897	25.3975	25.4087	2751700	1605000	1919500	261080	148620	122430	12	2.68178	1.02369	Q8NDT2;Q0VA89	Q8NDT2	Putative RNA-binding protein 15B	RBM15B
31.1019	31.2213	30.9524	30.1842	30.1581	29.9193	25790000	17281000	16083000	3496500	2490500	1920500	57	3.02839	1.00468	Q8WYP5;B3KVE5;B3KTD2;B3KRD0;Q96M44;C9J5C5;H7C4S1	Q8WYP5;B3KVE5	Protein ELYS	AHCTF1
29.2928	29.3894	29.2033	28.2944	28.4176	28.1614	29699000	24914000	25343000	5294000	4224100	3639700	13	3.40838	1.00406	A0A024R3R5;Q14739;C9JXK0;B4E0Z3;C9JES9	A0A024R3R5;Q14739;C9JXK0	Lamin-B receptor	LBR
24.6468	25.0807	24.9777	24.5312	22.9536	24.211	681220	615510	666500	106370	40158	27218	6	0.940292	1.00311	Q53EP0	Q53EP0	Fibronectin type III domain-containing protein 3B	FNDC3B
27.5534	24.3774	24.6896	24.3922	23.2062	26.0163	6380400	403190	565950	257650	60222	501480	9	0.315821	1.00189	P07900;K9JA46;Q2VPJ6;Q8TBA7;Q86U12;O75322;Q96HX7;G3V2J8;B4DTA5;Q86SX1;Q14568;Q58FG0;Q58FG1;Q58FF6	P07900;K9JA46;Q2VPJ6;Q8TBA7;Q86U12;O75322;Q96HX7	Heat shock protein HSP 90-alpha	HSP90AA1;EL52
24.5955	24.5606	24.9111	22.371	24.4796	24.2297	1760200	995670	1356100	121410	334480	158650	4	0.669801	0.995682	K7EIT8;A8MX75;P18074;K7ENL1;Q2TB79;E7EVE9	K7EIT8;A8MX75;P18074;K7ENL1	TFIIH basal transcription factor complex helicase XPD subunit	ERCC2
27.9464	28.2944	28.0591	27.2998	27.1279	26.8941	2029200	1586200	1602200	635520	287510	255720	5	2.5052	0.992712	B2RWP5;Q96L73;Q96DQ7;Q8NB95;Q96MN8;A4QPE5;A0A1W2PS55	B2RWP5;Q96L73;Q96DQ7	Histone-lysine N-methyltransferase, H3 lysine-36 and H4 lysine-20 specific	NSD1
28.385	28.4857	28.3487	27.4619	27.539	27.247	16716000	11310000	9624600	2661000	1607700	1436200	13	3.29422	0.990526	Q9Y232;C9JQG7	Q9Y232	Chromodomain Y-like protein	CDYL
24.7875	24.7082	24.7477	23.7502	24.3003	23.2429	637260	688950	524880	107050	76933	83803	5	1.48748	0.98332	P33897;Q6TGM1;Q6TGM0	P33897;Q6TGM1;Q6TGM0	ATP-binding cassette sub-family D member 1	ABCD1;ALD
27.9999	28.2492	28.1117	27.2672	27.1316	27.0161	4425000	4211700	4352200	939490	628480	409760	20	3.18141	0.981928	I3VM54;Q9Y2K7;I3VM53;B4DSG1	I3VM54;Q9Y2K7;I3VM53	Lysine-specific demethylase 2A	KDM2A
32.5055	32.8138	32.629	31.826	31.6668	31.5171	115050000	100060000	101630000	25191000	15640000	17352000	56	2.82559	0.979456	O60264;B7ZAX9;B4DZC0;Q86UA8;P28370;A0A0A0MRP6;B7ZLQ5;Q4W5H1;Q4W5G3;D7EZH4	O60264;B7ZAX9;B4DZC0	SWI/SNF-related matrix-associated actin-dependent regulator of chromatin subfamily A member 5	SMARCA5
28.1627	28.3364	28.1588	27.1336	27.5477	27.0568	7453600	6026200	8560500	1144000	741350	612100	17	2.40023	0.9733	A0A0C4DGP2;A0A0C4DGP5;Q86Y91;Q6NWY8	A0A0C4DGP2;A0A0C4DGP5;Q86Y91	Kinesin-like protein KIF18B	KIF18B
25.6332	25.6939	25.5973	24.9114	24.0694	25.0269	2347100	1702800	1691300	231920	39354	108120	9	1.48605	0.972246	O95251;E7EUP3;B7Z4D9;B3KVJ2;B4DG18;B4DJ40;B4DGH8	O95251;E7EUP3;B7Z4D9;B3KVJ2;B4DG18	Histone acetyltransferase KAT7	KAT7
25.1152	25.3512	25.1441	24.729	24.879	23.0884	360650	309800	358970	61854	30123	15754	6	0.773873	0.971357	Q9BTC0	Q9BTC0	Death-inducer obliterator 1	DIDO1
25.4001	24.6005	26.7871	24.9585	23.6936	25.2466	5331200	2432700	13130000	1712200	987640	1832100	2	0.532268	0.962986	K7EK06;K7ER16;Q9Y285;Q6IBR2;K7ER00	K7EK06;K7ER16;Q9Y285;Q6IBR2;K7ER00	Phenylalanine--tRNA ligase alpha subunit	FARSA;FARSLA
23.9085	24.3198	24.1551	23.3728	23.3868	22.7378	1178700	1242200	1032300	344200	298980	284230	2	1.76474	0.962002	Q6I9Y2;A0A024R332;H7C5E3	Q6I9Y2;A0A024R332;H7C5E3	THO complex subunit 7 homolog	THOC7
25.5186	25.937	25.6711	24.9852	25.7894	23.4743	955720	939260	1104000	223010	161290	48268	6	0.626026	0.959235	Q9Y2U8;A0A024RBB9;B4DI45;B4E2K7	Q9Y2U8;A0A024RBB9;B4DI45	Inner nuclear membrane protein Man1	LEMD3
24.3634	24.4563	24.4947	23.963	24.4088	22.0654	518420	661460	701990	174570	51868	50597	4	0.596148	0.95904	Q9H981;H0Y849;C9J7L6	Q9H981;H0Y849	Actin-related protein 8	ACTR8
25.5924	25.7486	26.1002	26.1813	24.3645	24.0329	3025500	2280800	3178300	1659900	924330	0	3	0.627565	0.95417	A0A087X1N3;O75818;X6RLL4;F8WC38	A0A087X1N3;O75818;X6RLL4	Ribonuclease P protein subunit p40	RPP40
26.6777	26.9665	26.7831	26.1815	26.0335	25.3597	9637700	8153600	7371100	2309000	1274300	896860	5	1.62993	0.950854	P17676;Q9BSC0;Q99557	P17676;Q9BSC0;Q99557	CCAAT/enhancer-binding protein beta	CEBPB
25.1838	24.9869	24.7039	24.1239	24.4509	23.45	1069100	541190	572720	122920	69532	41117	6	1.36173	0.949939	Q8NB78;H0Y6H0	Q8NB78;H0Y6H0	Lysine-specific histone demethylase 1B	KDM1B
25.1451	25.2859	25.2314	23.2039	24.67	24.9505	2136400	2099700	1609100	259720	219360	45632	5	0.805549	0.946032	Q8N8U2;A0A0B4J291	Q8N8U2;A0A0B4J291	Chromodomain Y-like protein 2	CDYL2
25.1036	25.3173	26.5816	23.3784	24.4481	26.3423	703810	684780	1681400	59323	95373	404080	10	0.40845	0.944559	F5GY55;B7Z2A1;Q16531;B4DZP5;B4DSA8;B7Z859;F5GWI0;F5GZY8;F5H2L3	F5GY55;B7Z2A1;Q16531;B4DZP5;B4DSA8	DNA damage-binding protein 1	DDB1
25.224	24.8423	24.5141	23.3613	23.2298	25.1845	4107600	1736200	1496600	1221700	224630	1317600	3	0.635501	0.934973	P62834;A8KAH9;Q5U0C3;F5H823;B7ZB78;F5GZG1;A0A075B6Q0;B7ZAY2;A0A0J9YXB3;P61224;A6NIZ1;A0A024RB87	P62834;A8KAH9;Q5U0C3	Ras-related protein Rap-1A	RAP1A
25.3502	25.6702	25.3274	25.4853	25.4362	22.639	3442600	3909800	3439900	1222900	627340	403100	6	0.417737	0.929103	Q96BK5;E5RGR1;E5RJG9;A0A0A6YYK5	Q96BK5;E5RGR1	PIN2/TERF1-interacting telomerase inhibitor 1	PINX1
23.876	23.7004	23.6573	23.275	23.1717	22.0148	204810	136380	154200	21272	0	13514	2	1.06061	0.924073	P52701;A0A087WYT6;Q6LAI4;A0A087WWJ1;Q1L838	P52701;A0A087WYT6;Q6LAI4;A0A087WWJ1;Q1L838	DNA mismatch repair protein Msh6	MSH6;GTBP
29.6286	29.8419	29.7112	28.9256	28.9165	28.5837	28718000	19239000	22291000	4541700	2633500	2305700	33	2.69367	0.918688	Q14807;A0A024R632;H3BRB3;B7Z9T5;H3BTH5;Q14985;O60846;Q14984;H3BQB9;B4DNF2;Q7LE35;I3L306	Q14807;A0A024R632;H3BRB3;B7Z9T5	Kinesin-like protein KIF22	KIF22
25.3683	25.8986	25.6932	25.1237	24.9263	24.1745	2387100	4436300	2865800	1876000	826250	1197200	4	1.3033	0.911861	B4DHE8;Q96DH6;J3QKT5;J3KTC1;B4DM51;H0YHB7;O43347	B4DHE8;Q96DH6;J3QKT5;J3KTC1;B4DM51	RNA-binding protein Musashi homolog 2	MSI2
25.2319	25.5631	25.0742	24.9584	23.2637	24.9176	1483000	1209300	994990	264780	0	141380	7	0.721976	0.909818	Q9Y2X9;B4DM04;B3KMX4;B3KND7	Q9Y2X9;B4DM04;B3KMX4	Zinc finger protein 281	ZNF281
27.191	27.3173	26.7376	26.4063	25.8536	26.2572	18387000	14597000	13030000	3157000	1944400	3035700	1	1.70751	0.909618	B4DZZ8;B4DVK8;Q92504;A0A1U9X8L9;A0A1U9X8K3;A0A1U9X8J5;A0A024RCX7	B4DZZ8;B4DVK8;Q92504;A0A1U9X8L9;A0A1U9X8K3;A0A1U9X8J5;A0A024RCX7	Zinc transporter SLC39A7	SLC39A7
24.3155	23.9605	25.0639	23.5398	24.4828	22.5927	470950	351960	585330	45100	72582	0	4	0.645912	0.908216	Q75MX6;Q9UHL9;E9PFE2;Q59FS0;A4D2M8	Q75MX6;Q9UHL9;E9PFE2;Q59FS0	General transcription factor II-I repeat domain-containing protein 1	GTF2IRD1
28.224	28.4769	28.509	27.6155	27.4263	27.4503	3987600	3280000	3944100	666080	346900	451580	34	2.95725	0.905916	Q9UK61;A0A024R363;A0A087X0F1	Q9UK61;A0A024R363;A0A087X0F1	Protein FAM208A	FAM208A
29.621	29.7771	29.7798	28.7395	28.9303	28.8087	12744000	12304000	11334000	2131300	1184000	1186000	40	3.52245	0.899846	D3DS96;Q9NRL2;Q59G54;B3KND8;Q05CW0;Q32ND1;A0A087WWN7;H0YJP5	D3DS96;Q9NRL2;Q59G54	Bromodomain adjacent to zinc finger domain protein 1A	BAZ1A
23.6983	24.097	24.4404	23.2555	22.5729	23.7092	240340	290060	357750	55298	36613	29204	3	1.07362	0.899353	Q9H8V3;C9J0L6;C9JDV9;C9JTI2;C9J1C4;C9JDB4;H7C3G1	Q9H8V3;C9J0L6;C9JDV9;C9JTI2;C9J1C4;C9JDB4	Protein ECT2	ECT2
27.8243	27.69	27.692	27.1091	26.7469	26.6657	9023000	5894000	6190800	1780000	905380	906130	13	2.47421	0.894886	A0A0C4DFX7;Q9H967;C9JE56	A0A0C4DFX7;Q9H967	WD repeat-containing protein 76	WDR76
28.6766	28.9395	29.0952	28.186	27.7717	28.0768	4676900	3407300	4835800	899890	363510	458420	44	2.16377	0.892244	Q12789;Q6AHZ7;Q6AWA4;H3BRD0;H3BU37;H3BU55;I3L1Z3;Q7Z7H4	Q12789;Q6AHZ7;Q6AWA4	General transcription factor 3C polypeptide 1	GTF3C1;DKFZp686A111;DKFZp686O0870
27.0672	27.0009	26.8463	26.3242	26.4439	25.4937	2484400	2114300	2068800	352490	248410	104410	21	1.35134	0.884218	Q59HG1;O95239;B3KNC0;Q6PKB2;Q2VIQ3;B4DYE2	Q59HG1;O95239;B3KNC0	Chromosome-associated kinesin KIF4A	KIF4A
25.3533	24.4198	25.0535	23.7385	23.2589	25.1932	1322000	245690	565910	0	0	382150	5	0.612964	0.878651	F5H6X6;B4DSM6;A0A024R592;V9HWJ0;Q14697;B4DJ30;B4DIW2;E9PKU7;B4DZ53;E9PNH1;Q9BS14	F5H6X6;B4DSM6;A0A024R592;V9HWJ0;Q14697;B4DJ30;B4DIW2;E9PKU7;B4DZ53	Neutral alpha-glucosidase AB	GANAB
28.8069	26.2206	25.4022	24.9809	26.2085	26.6197	13706000	1788700	1477800	484210	355890	807130	17	0.313771	0.873517	P42357;F8VNX0;F8W0V1;B4DLH8;Q4VB95;Q2PH61;H0YHB0	P42357	Histidine ammonia-lyase	HAL
26.6886	26.6037	26.5452	25.6257	25.6317	25.9779	3689100	3191200	3093200	587680	290960	438230	11	2.663	0.86739	Q96G26;Q9Y483;B4DZG1;Q7Z534;B4DZ69	Q96G26;Q9Y483;B4DZG1	Metal-response element-binding transcription factor 2	MTF2
25.3362	25.3347	25.3116	24.4453	24.551	24.3865	1350000	750770	1082900	153890	70051	77543	7	4.2292	0.866569	C9JA69;Q8WY36;A8K6U2;D3DN56;C9J8D0;Q9P043;Q9H6A7;Q6ZNU6;C9JYU6;C9JZA0;Q9H6G9	C9JA69;Q8WY36;A8K6U2;D3DN56;C9J8D0	HMG box transcription factor BBX	BBX
24.5673	24.1218	24.5796	24.0836	23.9797	22.6079	1104000	525540	906830	152910	58948	69318	4	0.802446	0.865842	Q5SWX3;A8K6N9;A0A0A0MS52;Q13555;A0A0A0MT11;Q8WU40;H0Y6G2;B3KY86;Q13280;D3DVK8;Q53H78;Q13554;A4D2J9;B4DVQ3;H7C394;H7BZC6;B7Z1Z6;H7BXS4;B3KTH7	Q5SWX3;A8K6N9;A0A0A0MS52;Q13555;A0A0A0MT11;Q8WU40;H0Y6G2;B3KY86	Calcium/calmodulin-dependent protein kinase type II subunit gamma	CAMK2G
26.5792	26.6158	26.0957	25.4789	25.3461	25.875	1839400	2399100	766070	197810	123570	139130	14	1.69627	0.863553	Q8IY18;B4E265	Q8IY18;B4E265	Structural maintenance of chromosomes protein 5	SMC5
29.3184	21.9341	22.7021	23.0453	23.3942	24.9299	5765500	36478	117550	12358	0	126400	44	0.131248	0.861739	Q92817;A0A024R8L8;K7EKI0;B7ZLH8;A8K2R8;A8MZ36	Q92817;A0A024R8L8;K7EKI0;B7ZLH8	Envoplakin	EVPL
30.1216	25.0219	24.6516	25.6953	25.5973	25.9285	59330000	2067000	963100	1557300	1335400	2955500	14	0.185242	0.858031	A0A1B0GW44;A0A1B0GV23;A0A1B0GVD5;A0A1B0GWE8;V9HWI3;P07339;A0A1B0GVP3;A0A1B0GU92;A0A1B0GU03;H7C469;C9JH19;H7C1V0;F8WD96;F8W787;A0A0S2Z3L4;A0A1B0GVF1	A0A1B0GW44;A0A1B0GV23;A0A1B0GVD5;A0A1B0GWE8;V9HWI3;P07339;A0A1B0GVP3;A0A1B0GU92;A0A1B0GU03;H7C469;C9JH19;H7C1V0;F8WD96	Cathepsin D;Cathepsin D light chain;Cathepsin D heavy chain	CTSD
24.1479	24.3884	24.2887	23.3142	24.1303	22.8133	384520	226180	464750	36679	37213	80430	5	1.03013	0.855732	Q4ZG57;Q14566;B4DRF6	Q4ZG57;Q14566	DNA replication licensing factor MCM6	MCM6
29.5051	24.7393	25.3396	24.1958	25.7898	27.0352	52159000	1738300	390900	444950	252490	1204700	15	0.191533	0.854411	V9HWK1;P60174;Q53HE2;B4DUI5;Q2QD09;U3KPZ0;U3KQF3;U3KPS5	V9HWK1;P60174;Q53HE2;B4DUI5;Q2QD09	Triosephosphate isomerase	TPI1
26.9931	27.1281	27.061	26.3657	26.3195	25.9537	4837200	4160400	4520200	930900	634010	525960	14	2.47162	0.847727	A5D8X2;Q9UJX3;A0A024RBJ3;B3KMP2;A8KAQ7;Q4KMX6;Q2M2R1;H0YIW2;H0YIX7;Q69YV3	A5D8X2;Q9UJX3;A0A024RBJ3;B3KMP2;A8KAQ7;Q4KMX6;Q2M2R1	Anaphase-promoting complex subunit 7	ANAPC7
25.1475	25.4767	26.1276	25.3717	23.4724	25.3647	1638000	1694500	2865900	215520	94991	302290	5	0.538671	0.847629	Q9Y6V7;A8K7A1;M0R1S3;M0QZC0;M0R0K1;Q9NVY6;M0QXD4;Q69YV6	Q9Y6V7;A8K7A1	Probable ATP-dependent RNA helicase DDX49	DDX49
24.1539	24.5857	24.1918	23.1773	23.8401	23.4038	562690	792030	462700	81260	0	30279	3	1.60701	0.836752	B4DX74;Q99728;Q53F80;B2RAM8;A0AVN2;F6MDI4	B4DX74;Q99728;Q53F80;B2RAM8;A0AVN2	BRCA1-associated RING domain protein 1	BARD1
28.0411	28.458	28.1999	27.3809	27.6693	27.1414	11604000	12542000	11614000	5334500	3464900	2981200	14	1.89287	0.835787	O43463;B4DMP6;Q14828	O43463;B4DMP6	Histone-lysine N-methyltransferase SUV39H1	SUV39H1
24.2982	24.2352	24.4475	22.6528	23.8919	23.9311	514380	526360	351270	0	33496	0	6	0.918939	0.835031	Q8N3E9;D3DX63;F5GXC1;K7EQF2	Q8N3E9;D3DX63;F5GXC1;K7EQF2	1-phosphatidylinositol 4,5-bisphosphate phosphodiesterase delta-3	PLCD3
28.4202	28.5947	28.3913	27.6285	27.6984	27.5759	15869000	10364000	9847300	1714200	892560	998070	25	3.48124	0.834483	Q9P0U3;F8VRZ8;Q7Z3G1;F8W0I8;Q6N001	Q9P0U3	Sentrin-specific protease 1	SENP1
25.9713	25.6589	25.9078	25.2814	24.4574	25.3082	1137800	770280	958500	181650	51081	188460	8	1.31774	0.830318	B7Z2R3;A0A024R225;A0A024R233;B7Z954;Q9UDY2;A0A1B0GTW1	B7Z2R3;A0A024R225;A0A024R233;B7Z954;Q9UDY2;A0A1B0GTW1	Tight junction protein ZO-2	TJP2
26.2539	26.3409	26.3602	26.6984	23.1978	26.6106	2047300	1526200	1711800	990160	698750	755650	1	0.285534	0.816006	F4ZW66	F4ZW66
25.4414	25.7602	25.7738	25.4546	25.3812	23.7021	1944000	2457600	2182800	708790	165200	213880	7	0.627975	0.812548	D3DR86;A0A1P8C958;Q00653;B4E1P2;Q04864	D3DR86;A0A1P8C958;Q00653	Nuclear factor NF-kappa-B p100 subunit;Nuclear factor NF-kappa-B p52 subunit	NFKB2
26.8151	27.7403	27.6847	27.3911	26.2756	26.1684	7014800	4459200	2861400	1023900	618680	339570	10	0.747353	0.801665	Q8IZL8;A8K548;C9JFV4;B4DR36;I3L445;O15451;E7EV54;B4DEX7;I3L1P4;I3L4M7;I3L4P1	Q8IZL8;A8K548;C9JFV4;B4DR36;I3L445;O15451;E7EV54;B4DEX7	Proline-, glutamic acid- and leucine-rich protein 1	PELP1
26.5472	26.7253	26.6588	25.8563	25.561	26.1298	3969600	2436200	2757900	528580	373850	486900	7	2.00316	0.794737	Q99549;A0A0A0MT47;H0Y6J1;B3KS10	Q99549	M-phase phosphoprotein 8	MPHOSPH8
23.3372	23.5995	23.7821	22.7056	23.2093	22.4288	191970	160450	183730	25692	39291	20466	2	1.40569	0.79165	E7ESG2;Q9HAW4;Q1RMC5	E7ESG2;Q9HAW4;Q1RMC5	Claspin	CLSPN
29.4757	29.7401	29.5939	28.9368	28.9082	28.5932	73161000	57588000	70534000	12817000	8946700	6377300	14	2.38352	0.79052	P50402;Q5HY57;F8WEQ1	P50402;Q5HY57	Emerin	EMD
24.3478	24.5088	24.6827	24.4056	23.8311	22.9336	1839900	1642000	1863700	720160	177700	343600	2	0.834102	0.789655	C9J384;D3DN44;Q9BQ75;B3KW72	C9J384;D3DN44;Q9BQ75;B3KW72	Protein CMSS1	CMSS1;hCG_2023567
24.8394	24.3675	25.001	22.3052	24.5776	24.9671	1218000	444610	995890	38826	49832	129260	8	0.389105	0.785989	Q9BR63;Q9NSD9;A8K666;B7ZB32	Q9BR63;Q9NSD9;A8K666;B7ZB32	Phenylalanine--tRNA ligase beta subunit	FARSB
30.2158	26.565	26.1553	26.0636	26.9949	27.5361	99742000	4737400	4177200	3025700	3566700	5011500	8	0.224128	0.780523	Q6ZVX7	Q6ZVX7	F-box only protein 50	NCCRP1
26.5934	23.6912	23.1344	23.574	23.47	24.0464	7651300	424970	246430	124670	162660	431840	8	0.288512	0.776138	A0A087WYQ3;Q05DL8;O75131;A0A024R994;E5RHZ0;A0A087WUS8;A0A087WXR6;H0YB26;E5RFT7;A0A0G2JMP5	A0A087WYQ3;Q05DL8;O75131;A0A024R994;E5RHZ0;A0A087WUS8;A0A087WXR6;H0YB26	Copine-3	CPNE3
29.3448	29.5189	29.5007	28.7031	28.6704	28.6717	17662000	14723000	15624000	3664000	2577600	2568000	22	3.78941	0.773037	Q96T88;A0A087WVR3;A0A087WTW0;A0A087WWG9;B4E0F9	Q96T88;A0A087WVR3;A0A087WTW0	E3 ubiquitin-protein ligase UHRF1	UHRF1
25.5631	25.6028	25.8792	25.1384	24.2447	25.3439	1588600	1175900	1362200	281220	61239	162290	6	1.03145	0.77268	Q96KM6	Q96KM6	Zinc finger protein 512B	ZNF512B
26.5871	26.7367	26.5066	26.3197	25.7694	25.4293	603490	588060	604390	117800	91847	55664	13	1.34447	0.77064	Q03164;E9PR05;B4DIJ7;Q86YP1;Q86YN9;B3W6H7;Q8N6B4;Q1HA41;A0A075TKX8;Q0ZHH1;D3K0R4;Q9HB83;A2JNH0;Q86YP0;Q9HB82;Q9HB88;Q9HB87;Q9HBJ4;Q86YN8;A2JNH1;Q86YP2;Q9HB81;Q8NI09;Q8NFI1;A2JNH3;H7BYJ6;A2JNH2;Q8NFI2;Q9UPD0;Q8NFI0;Q9Y6P1;Q8NFH9;Q8TD98;B4E012;Q9UMN6	Q03164	Histone-lysine N-methyltransferase 2A;MLL cleavage product N320;MLL cleavage product C180	KMT2A
25.0391	24.7357	25.0288	24.1256	24.0262	24.3651	1648800	886430	893450	178520	51989	258060	4	2.24128	0.762204	Q05D78;F8W7U8;P49959;A0A024R395;Q9BS79;F5GXT0;F5H742;A0A0S2Z438;F5H256	Q05D78;F8W7U8;P49959;A0A024R395;Q9BS79;F5GXT0	Double-strand break repair protein MRE11A	MRE11A
25.8252	26.0275	25.9113	23.9739	25.8547	25.6546	6199200	5162000	5320300	1217600	1394600	1363300	4	0.563263	0.760246	H7C4H2;Q9Y5M8;Q549N5	H7C4H2;Q9Y5M8;Q549N5	Signal recognition particle receptor subunit beta	SRPRB
28.6734	26.325	26.7915	26.4812	25.4892	27.5419	6373900	3202600	2080500	535810	304500	956130	14	0.336746	0.759178	O43707;A0A0S2Z3G9;Q96BG6;F5GXS2;B4E337;B4DSX0;A0A0S2Z3C0;A0A0S2Z3X3;H7C144;P35609;K7EJH8;Q08043;B2R8Y4;K7EP19;B7Z2N5;B7Z4V1;B7Z4P6;Q59FD9;B7Z4K1;F6THM6;B4DZQ2;A0A087WSZ2;Q5ZEZ4;H0YJ11;G3V2W4;H0YJW3;A1L0V1;Q4VAM3;G3V2X9	O43707;A0A0S2Z3G9;Q96BG6;F5GXS2;B4E337;B4DSX0	Alpha-actinin-4	ACTN4
24.9373	25.4287	25.4416	25.1545	24.1595	24.2178	2799000	3457400	3917000	659380	278510	0	6	0.980542	0.7586	Q5TBH9;Q8NDD1;Q5TBI2;B4E0F7	Q5TBH9;Q8NDD1;Q5TBI2	Uncharacterized protein C1orf131	C1orf131
24.5436	24.3558	24.3899	23.5751	23.3062	24.1406	965270	894650	465950	0	0	0	5	1.39529	0.75576	B5BUA4;Q5FBB7;A0A024R2J4;E9RFS7;F8WB17	B5BUA4;Q5FBB7;A0A024R2J4	Shugoshin-like 1	SGOL1
25.7016	25.7624	26.3714	25.8828	25.5775	24.113	27356000	20814000	31577000	12391000	6030300	1966100	2	0.571866	0.754028	P61956;A0A024R8S3	P61956;A0A024R8S3	Small ubiquitin-related modifier 2	SUMO2
25.3275	25.5588	25.5462	25.6341	22.8051	25.7599	1248800	2344300	2566000	1087700	331610	832020	4	0.314639	0.74446	B4DDH8;Q96N66	B4DDH8;Q96N66	Lysophospholipid acyltransferase 7	MBOAT7
27.702	28.0999	27.828	27.2561	26.994	27.149	7864300	6359400	7607700	1757500	723240	1126900	13	2.21991	0.743623	Q9Y5Q8;Q5T7U1;H7BY84;Q9NXK9;B7Z1V3;H0Y5D2;Q5T7U0;Q5T7U4	Q9Y5Q8;Q5T7U1;H7BY84;Q9NXK9	General transcription factor 3C polypeptide 5	GTF3C5
30.2049	30.2801	30.0006	29.4175	29.5854	29.2589	199970000	109810000	126480000	37704000	33020000	24959000	13	2.38065	0.741298	P27635;X1WI28;X5D2T3;F8W7C6;A0A087WV22;H7C123;X5D7P1;H7C2C5;B8A6G2;X5D2W5;A6QRI9;Q96L21	P27635;X1WI28;X5D2T3;F8W7C6;A0A087WV22	60S ribosomal protein L10	RPL10
24.4135	24.3144	24.2931	23.6744	24.174	22.9598	573940	246900	365510	43233	0	0	5	0.975481	0.737572	B4DVM9;P29375;E7EV89;B4DVX3	B4DVM9;P29375;E7EV89;B4DVX3	Lysine-specific demethylase 5A	KDM5A
26.5983	27.1012	27.8478	26.9032	26.2221	26.2139	803490	854290	1230100	310610	147940	154260	17	0.792479	0.736045	Q14643;A0A024R2E1;A0A024R2I2;B4DER3;B7ZMI3;Q59H91;B4DGH1;B4DJU3	Q14643;A0A024R2E1;A0A024R2I2	Inositol 1,4,5-trisphosphate receptor type 1	ITPR1
28.7125	28.7429	28.5738	28.0493	27.9665	27.8111	28740000	15278000	16397000	4105900	3072100	2427000	12	2.96495	0.734127	Q9H568	Q9H568	Actin-like protein 8	ACTL8
24.6721	24.3393	24.3691	24.6373	21.8423	24.7089	3021900	1420000	1692300	1109300	1130700	950420	3	0.314589	0.730675	M0QXN5;P37198;A0A024QZF1	M0QXN5;P37198;A0A024QZF1	Nuclear pore glycoprotein p62	NUP62
28.0559	28.1382	28.1123	27.4798	27.5333	27.1111	27885000	19872000	21982000	4471700	3118100	1948500	6	2.24194	0.727398	Q9NZ01;B3KM97;M0R3C3;B3KSQ1;M0QXM3;M0R329;B4DR74	Q9NZ01;B3KM97;M0R3C3;B3KSQ1	Very-long-chain enoyl-CoA reductase	TECR
23.8057	24.5051	24.1704	23.0722	23.9431	23.2989	412800	465390	392110	234250	108200	81204	2	1.0281	0.722325	A0A024RAC6;Q14241	A0A024RAC6;Q14241	Transcription elongation factor B polypeptide 3	TCEB3
29.5012	29.6154	29.4902	29.0263	28.6721	28.7562	12621000	9705700	11305000	2811200	1477300	1714600	32	2.48562	0.717438	Q93009;B7ZAX6;Q6U8A4;B7Z855;H3BND8;B7Z7T5;F5H2X1;B7Z842;H3BUV0;H3BTM1;H3BRA2;H3BQD1;H3BMF6;I3L2D8	Q93009;B7ZAX6;Q6U8A4;B7Z855;H3BND8;B7Z7T5;F5H2X1	Ubiquitin carboxyl-terminal hydrolase 7;Ubiquitin carboxyl-terminal hydrolase	USP7
28.1957	28.2496	28.1602	27.6055	27.5614	27.2906	2194500	1488900	1306500	363830	285380	196420	28	2.66676	0.715988	Q8IZT6;B3KWI2;Q4G1H0;A0A087WV76;Q4G1H2;Q5VYL4;B3KM85	Q8IZT6;B3KWI2	Abnormal spindle-like microcephaly-associated protein	ASPM
26.8061	24.915	25.0409	24.9713	22.7214	26.9315	10914000	2059300	2201600	727430	303840	2205900	5	0.201902	0.712619	C9J9K3;P08865;A0A024R2P0;A0A0C4DG17;A0A024R7P5;Q96RS2;F8WD59	C9J9K3;P08865;A0A024R2P0;A0A0C4DG17;A0A024R7P5;Q96RS2	40S ribosomal protein SA	RPSA;LAMR1P15
30.3823	30.6236	30.4628	29.8298	29.8616	29.6422	17562000	18825000	14296000	3192200	2475300	2222500	48	2.70976	0.711688	Q8WWQ0;Q9NWP3;Q5R2U5;H0Y4A7;Q5R2U4;H0Y4R9;Q5R2U9;H0Y500;Q5R2U8;H0Y5I9	Q8WWQ0	PH-interacting protein	PHIP
29.014	29.222	29.0015	28.5312	28.0688	28.5092	29478000	22408000	20775000	8581900	4654400	7190000	12	1.88282	0.709443	D3DUR9;Q8TF68;B4DQU6;E9PHB3;F5H8L7;Q5T0B9;R4GMR4;A9X425;A9X424;F5H105	D3DUR9;Q8TF68;B4DQU6;E9PHB3	Zinc finger protein 384	ZNF384
24.2245	24.1256	24.4592	23.862	23.0229	23.8016	246340	152750	189630	57070	14157	0	3	1.15639	0.707583	Q461N2;Q3L8U1;B7ZML1;B4DR07;H3BTW3	Q461N2;Q3L8U1;B7ZML1;B4DR07;H3BTW3	Chromodomain-helicase-DNA-binding protein 9	CHD9
29.5088	29.7628	29.8736	29.356	29.0523	28.6233	18451000	13248000	19253000	4751700	2750100	2020400	36	1.37943	0.704561	O15381;B4DLM8;B4DQJ4;E9PH71;C9J6P7;A0JLP9;E7EWK7;C9JP83;B4DF43;E9PGD8;Q96PA2;F8WF01;A0A087WV72	O15381;B4DLM8;B4DQJ4	Nuclear valosin-containing protein-like	NVL
30.3281	30.5936	30.4254	29.7843	29.8326	29.6362	23801000	20595000	22573000	6248600	5334800	4547300	39	2.69553	0.698019	Q01780;B4DKG8;B4DFE4;Q59G73;K7EJ37	Q01780;B4DKG8;B4DFE4	Exosome component 10	EXOSC10
27.1868	26.8164	27.01	26.3598	26.6118	25.9496	3694700	1650600	1943800	333020	350890	163490	16	1.46652	0.697322	Q4KMR3;Q12965;H0YNQ8;Q14779;B4DVP3;H0YLJ4;Q92827;O00160;B0I1T1;Q6ZNI9;Q4LE34;H0YN00	Q4KMR3;Q12965	Unconventional myosin-Ie	MYO1E
27.6381	27.9561	27.7657	27.1839	27.0644	27.0225	5844900	4870500	4566600	1243300	662950	809730	1	2.58249	0.696344	F8WAJ0	F8WAJ0		DDX31
24.3892	23.9436	23.9363	22.9725	23.1922	24.0157	531240	865850	854430	0	0	0	3	0.926779	0.69624	P19784;H3BNI9;H3BV19;H3BSA1	P19784;H3BNI9	Casein kinase II subunit alpha	CSNK2A2
26.8185	27.0159	27.0409	26.2669	26.2717	26.2528	5303000	4341200	4308500	928910	567210	546050	11	3.22374	0.694649	Q86Y07;Q05CR6;A8K9L2;B7Z2X1;E9PBU1;E7ERS5	Q86Y07;Q05CR6;A8K9L2	Serine/threonine-protein kinase VRK2	VRK2
25.306	25.4535	25.2802	24.5487	24.7748	24.6522	1178300	858740	941610	249980	178650	97198	4	2.90204	0.687979	H0Y3N9;Q9UPP1;H0Y589;A0A024R9Y4	H0Y3N9;Q9UPP1;H0Y589	Histone lysine demethylase PHF8	PHF8
25.1037	25.5481	25.5049	24.7947	24.5757	24.7248	723680	560610	708280	136090	78097	85237	9	1.93821	0.687131	Q14865	Q14865	AT-rich interactive domain-containing protein 5B	ARID5B
25.9674	26.0121	26.4052	25.4011	25.4317	25.5045	1068700	829980	1370900	167480	194410	220560	6	2.06051	0.682477	B2R8Y6;Q8N3U4;Q6MZM3;Q6MZM4;Q6AI02;Q6MZP3;B1AMT4;B4DQ46;Q68DW7;Q8WVM7;Q4LE48;B1AMT1;B1AMT2;B1AMT3	B2R8Y6;Q8N3U4;Q6MZM3;Q6MZM4;Q6AI02;Q6MZP3;B1AMT4;B4DQ46	Cohesin subunit SA-2	STAG2;DKFZp686C21148;DKFZp686P16143;DKFZp686P168;DKFZp686I05169
27.3693	27.4988	27.3366	26.9246	26.7623	26.4757	7541300	2857100	3229000	1265200	992130	1140800	12	2.07993	0.68072	O00257;A0A0S2Z5B2;A0A0S2Z4Q9;F8WCW6;I3L4F1	O00257;A0A0S2Z5B2;A0A0S2Z4Q9	E3 SUMO-protein ligase CBX4	CBX4
25.2817	24.9634	25.017	24.3888	24.4627	24.3726	436570	392450	353410	10179	20938	22470	8	2.57434	0.67932	A0A0A0MS59;A0A0C4DFX4;Q6ZRS2;A0A087X0E3;G1UI29;B3KN63	A0A0A0MS59;A0A0C4DFX4;Q6ZRS2;A0A087X0E3;G1UI29;B3KN63	Helicase SRCAP	SRCAP
24.4518	24.9956	24.9137	24.9003	24.0884	23.3352	2822500	1197600	3661600	585240	631740	382500	5	0.634311	0.679078	C9JEV9;O95639;B7Z7B0;H7C419;F8WEL7	C9JEV9;O95639;B7Z7B0;H7C419	Cleavage and polyadenylation specificity factor subunit 4	CPSF4
28.7831	29.1112	28.9438	28.334	28.458	28.0127	25624000	18539000	18328000	5074400	4653400	3792700	2	1.84832	0.677778	B2RC06;J3KT86;B4DXA6;A0A0A0MSY3;V9HW16;Q5Y191;Q9UQB9	B2RC06;J3KT86		AURKB
28.2736	27.3292	27.5606	27.3183	26.6562	27.1623	60295000	24847000	33146000	13547000	6264300	6492600	5	0.907484	0.675538	Q6FGH9;P63167;F8VXL2;F8VRV5;F8VXI7;Q96FJ2	Q6FGH9;P63167;F8VXL2;F8VRV5	Dynein light chain 1, cytoplasmic	DNCL1;DYNLL1
26.5308	27.1241	26.7507	25.9809	26.115	26.2853	12789000	13117000	11544000	1192400	1622400	2380800	7	1.59342	0.674788	Q9P031;F8VNY5	Q9P031;F8VNY5	Thyroid transcription factor 1-associated protein 26	CCDC59
25.1353	25.4103	25.3681	24.8481	24.8747	24.1704	481030	532660	472040	120500	52951	0	6	1.28478	0.673502	A0A024RC75;O14647;A0A1B0GTU9;A8K9Y5;A0A0D9SFV8;A0A0D9SGK0;Q8N677;B7Z3I4	A0A024RC75;O14647;A0A1B0GTU9;A8K9Y5	Chromodomain-helicase-DNA-binding protein 2	CHD2
24.7983	24.4989	24.413	23.7214	23.769	24.2092	1170400	819320	926520	91765	91874	169310	5	1.58399	0.670225	B7Z7P4;X5CKB3;Q03518;B2R9F3;A0A1V0E3Y2;A0A1V0E3X9;A0A140T9T7;A0A0S2Z5A6;Q6QWC0;A0A1V0E3X7;A0A1V0E3W5;A0A0S2Z4R8;Q6QWC1;A0A1V0E3X4	B7Z7P4;X5CKB3;Q03518;B2R9F3;A0A1V0E3Y2;A0A1V0E3X9;A0A140T9T7;A0A0S2Z5A6;Q6QWC0;A0A1V0E3X7;A0A1V0E3W5;A0A0S2Z4R8;Q6QWC1;A0A1V0E3X4	Antigen peptide transporter 1	TAP1
26.2488	25.2861	25.4851	23.5113	25.824	25.6743	10185000	3597600	4808000	697890	1398200	1250700	6	0.346012	0.67011	Q53HL1;P19105;O14950;J3QRS3;Q2F834;Q71U02;Q6IBG1;P24844;J3KTJ1	Q53HL1;P19105;O14950;J3QRS3;Q2F834	Myosin regulatory light chain 12A;Myosin regulatory light chain 12B	MYL12A;MYL12B
24.5981	24.7595	24.7827	23.7256	24.7963	23.6133	2234800	311340	355510	90276	124910	79730	3	0.81073	0.66839	Q9UFC0;A0A140VJD0;Q59FT0;F8WDB4;H7C5S6	Q9UFC0;A0A140VJD0;Q59FT0	Leucine-rich repeat and WD repeat-containing protein 1	LRWD1
26.0876	24.2824	24.4351	24.7087	24.4458	23.6455	2073400	408170	722380	97162	0	61471	6	0.433143	0.668331	B4DE69;B4DQY1;B4DDF7;P30153;A8K7B7;A8K3H8;B3KQV6;Q8NB89;B4E1Q0;C9J9C1;E9PH38;P30154;A8K8B0	B4DE69;B4DQY1;B4DDF7;P30153;A8K7B7;A8K3H8;B3KQV6;Q8NB89;B4E1Q0;C9J9C1	Serine/threonine-protein phosphatase 2A 65 kDa regulatory subunit A alpha isoform	PPP2R1A
24.5656	23.9797	24.6502	24.5018	22.9226	23.7758	8775500	3498800	7166600	2185500	1266600	1185600	1	0.591102	0.665091	Q8N730;B1AH87;Q13850;P30536	Q8N730;B1AH87;Q13850;P30536	Translocator protein	PBR;TSPO
24.2659	23.7292	24.2288	23.5065	23.0313	23.7004	1123900	554720	841740	330060	93722	300140	2	1.18095	0.661907	B4DDG3;Q05048	B4DDG3;Q05048	Cleavage stimulation factor subunit 1	CSTF1
25.351	24.0127	24.4264	22.3207	24.7301	24.7574	2737200	605390	676030	117840	321380	383170	4	0.298087	0.660572	B4DUD6;Q8TC62;E7ES33;Q3LIE9;A4GYY8;A8K3D0;Q16181;E7EPK1;B4DNE4;B4DPQ6;A0A024RA87;G3V1Q4;A0A023T695;Q5JXL7;Q3B7A3;Q59EY4;A4D1Y2;A0A0U1RQK0;A0A0U1RRD1;A0A0U1RRM2;A0A0U1RRH9;A0A0U1RRE1;Q6ZU15	B4DUD6;Q8TC62;E7ES33;Q3LIE9;A4GYY8;A8K3D0;Q16181;E7EPK1;B4DNE4;B4DPQ6;A0A024RA87;G3V1Q4;A0A023T695;Q5JXL7;Q3B7A3;Q59EY4;A4D1Y2	Septin-7	SEPT7;Nbla02942;DKFZp686F17268;DKFZp586I031;LOC392884
23.9384	23.6685	23.3133	21.7719	23.5598	23.6168	577110	352830	162290	24531	0	0	3	0.447071	0.657234	A0A0G2JNN3;Q96PV6;A0A087WTE7;A0A024R4R9;C9JMY0;A0A087WUE4	A0A0G2JNN3;Q96PV6;A0A087WTE7;A0A024R4R9;C9JMY0;A0A087WUE4	Leukocyte receptor cluster member 8	LENG8
24.3226	24.1078	24.7637	22.8155	24.1569	24.2601	1565200	784960	1680700	461540	305660	263670	2	0.578272	0.653867	Q05DL3;P48729;V9HW00;E5RG27;D6RGE5;B4E1D9;D6REM4;Q6PJ06;Q8N752	Q05DL3;P48729;V9HW00;E5RG27;D6RGE5;B4E1D9;D6REM4;Q6PJ06;Q8N752	Casein kinase I isoform alpha;Casein kinase I isoform alpha-like	CSNK1A1;CSNK1A1L
25.8944	23.8707	23.7551	22.0971	24.589	24.8796	12884000	1741100	1638700	740470	583310	2010000	5	0.226881	0.651512	P35754;A0A024RAM2;D3DQK5	P35754;A0A024RAM2	Glutaredoxin-1	GLRX
25.4973	26.232	26.2584	25.9296	25.8933	24.2109	1835000	2017900	2507500	724750	401290	269460	7	0.453016	0.651278	Q86U38;Q5HYL4;B3KVY3	Q86U38;Q5HYL4;B3KVY3	Nucleolar protein 9	NOP9;DKFZp686E1893
30.1759	30.4111	30.5142	29.9706	29.666	29.5147	125010000	130040000	159710000	23461000	26829000	23237000	14	1.75032	0.649979	A0A087WXM6;J3QQT2;J3KRX5;P18621;A0A024R261;A0A0A6YYL6;J3QLC8;A0A0A0MRF8;J3KRB3;A0A087WWH0;J3QS96;A0A087WY81;J3KSJ0;A4D1R6;A4D1R5	A0A087WXM6;J3QQT2;J3KRX5;P18621;A0A024R261;A0A0A6YYL6;J3QLC8;A0A0A0MRF8;J3KRB3;A0A087WWH0;J3QS96	60S ribosomal protein L17	RPL17
24.6686	25.3384	25.3478	25.3819	23.3686	24.6561	834960	1031400	1680300	404070	88020	195650	4	0.442533	0.649436	Q9H4H8;A0A087WXK8	Q9H4H8;A0A087WXK8	Protein FAM83D	FAM83D
26.0717	26.6629	26.4937	26.1721	25.526	25.5854	7233700	8159200	6997000	1726800	998400	1157100	5	1.12528	0.648289	B4DNH5;P58317;Q6ZMS4;O14881;O14884;K7EQI1;Q6RFR6;A0A0C4DGV0;C9J6L6;P0CG24;A4D2A4;J3KT56;A7MAY2;A1A525;Q86U76;B2RDB6;Q9BY29;H3BNI0;B3KRP4;A0A1W2PP20;Q6AWC6;P17036;P17023;Q86W11;Q9HBT8;B2RCD9;A0A087WUV0;Q8NF99;P15622;B3KNS9;P17032;B3KNB1;Q8N883;B4DLS2;Q7Z3R2;P17027;B3KR55;Q5MCW4;A0A024R0G4;Q4V348;B9EH69;Q5TYW1;A8K7Y5	B4DNH5;P58317	Zinc finger protein 121	ZNF121
25.3915	25.7212	26.0125	25.4918	24.3577	25.3341	561150	465080	768890	131590	21187	69352	12	0.747705	0.647231	Q12873;B4DLC6;B4DKV1;Q2TAZ1;B3KWV4;H7C2H0;I3L229;H7C3H7;H7C0J3	Q12873;B4DLC6	Chromodomain-helicase-DNA-binding protein 3	CHD3
25.9798	26.2713	26.2834	26.0042	25.5017	25.1008	954410	378120	736150	228370	51986	33073	14	1.08063	0.642595	O75165;B3KN02;Q8N7A5	O75165	DnaJ homolog subfamily C member 13	DNAJC13
24.3104	24.7442	24.9266	24.2252	24.885	22.9594	1198700	1041000	1314200	236540	144400	149000	3	0.463885	0.637206	B4DLF8;Q15291;A0A024R9B5;B4DMM7	B4DLF8;Q15291;A0A024R9B5;B4DMM7	Retinoblastoma-binding protein 5	RBBP5
26.0684	27.0743	27.3258	26.4887	26.1799	25.8931	1905600	3099500	5003000	1453300	633040	351580	10	0.687127	0.635571	Q6P1J9;B4DV47;A0A1B0GUB2;A0A0S2Z5M9;A0A0S2Z5N1	Q6P1J9;B4DV47;A0A1B0GUB2;A0A0S2Z5M9	Parafibromin	CDC73
25.1507	25.3493	24.87	24.8688	25.2467	23.3492	2864000	2633600	1986800	704410	378830	109770	7	0.459851	0.635108	A0A0C4DGQ8;Q6IAN0;J3KRS1;J3QLJ8;J3QKT1	A0A0C4DGQ8;Q6IAN0;J3KRS1	Dehydrogenase/reductase SDR family member 7B	DHRS7B
24.8676	25.0406	24.3651	24.7884	22.8703	24.7133	2213300	2063700	1664800	876010	293900	622180	4	0.40813	0.633803	E9PK85;P62070;P10301;A0A024QZF2	E9PK85;P62070	Ras-related protein R-Ras2	RRAS2
31.3932	31.5748	31.5199	31.0834	30.7757	30.7305	248870000	208100000	222480000	71002000	48794000	43290000	13	2.16675	0.632734	P61313;A0A024R2Q4;E7EQV9;B4DLP4;E7ENU7;E7EX53;B4DEN1;Q96S84;A4D1Q5	P61313;A0A024R2Q4;E7EQV9;B4DLP4;E7ENU7	60S ribosomal protein L15;Ribosomal protein L15	RPL15
24.2681	24.1448	24.318	23.9628	23.2802	23.5984	441190	380980	321420	92376	52688	33773	3	1.43701	0.629878	B4E147;A8CDT9;A0A087WY00;G3V394;Q9Y4I1;F8WE88;F8W6H6;Q59FF5;Q7Z7A5;B3KSA2;Q9ULV0	B4E147;A8CDT9;A0A087WY00;G3V394;Q9Y4I1;F8WE88;F8W6H6;Q59FF5	Unconventional myosin-Va	MYO5A
28.3916	21.74	22.0291	22.1361	23.9624	24.1746	6075400	63450	105260	55279	0	600000	18	0.0996676	0.629218	V9HW80;P55072;Q96IF9;Q0IIN5;Q9NTC4;Q9HAP0;Q9HAP1;C9JUP7;C9IZA5	V9HW80;P55072;Q96IF9;Q0IIN5;Q9NTC4	Transitional endoplasmic reticulum ATPase	VCP;DKFZp434K0126
25.6934	25.9336	26.0643	25.3335	25.3048	25.1655	397560	489060	594170	127440	59150	54158	10	2.19395	0.629138	Q8N201;A4D212;A4D213;Q9BT91	Q8N201;A4D212;A4D213	Integrator complex subunit 1	INTS1;DKFZP586J0619
24.729	25.018	25.1963	24.6051	24.7965	23.6636	2132800	1215400	1921300	317450	248440	86018	5	0.76712	0.626034	Q96H22	Q96H22	Centromere protein N	CENPN
26.8545	26.9275	26.998	26.2157	26.3446	26.3436	11884000	8188200	7119000	1634800	1556000	1538300	8	3.3324	0.625348	Q06587;A0A1U9X8F2;A0A1U9X8F1;B4DVB5;B4DW57;A0A024RCR9;B4DMN3	Q06587;A0A1U9X8F2;A0A1U9X8F1;B4DVB5;B4DW57;A0A024RCR9	E3 ubiquitin-protein ligase RING1	RING1
28.5323	28.7771	28.719	28.2201	27.8814	28.0673	5208500	4229700	4772400	2169300	689520	1124000	18	2.14195	0.619872	Q8IXT5;B9ZVT1;E5RJW8;E5RHG1;E5RJ83;E5RJV8	Q8IXT5;B9ZVT1	RNA-binding protein 12B	RBM12B
25.7302	25.9749	26.0955	25.3644	24.8736	25.7088	2312600	2371800	5003500	1713900	347970	714760	7	1.09601	0.61792	Q99496;X6RFN3	Q99496;X6RFN3	E3 ubiquitin-protein ligase RING2	RNF2
24.7602	24.2886	24.3508	24.6005	22.7758	24.1787	1700700	750390	865300	244370	100650	109370	2	0.465723	0.614857	Q9BQE3;Q53GA7;F5H5D3;B7Z1K5;A0A1W2PQM2;Q8N532;F8VVB9;F8VQQ4;F8VX09;F8VWV9;F8VRZ4;F8VS66;A6NHL2;C9K0S6;F8VRK0;Q6QMJ5;F8VXZ7;F8W0F6	Q9BQE3;Q53GA7;F5H5D3;B7Z1K5;A0A1W2PQM2;Q8N532	Tubulin alpha-1C chain	TUBA1C
28.1614	28.3872	28.4303	27.739	27.8178	27.5793	14621000	13649000	13991000	3230400	2495100	2620000	14	2.31225	0.614236	Q9HC52;C9J6K3;C9JM54;B3KT27;B0QXZ6;O95503	Q9HC52	Chromobox protein homolog 8	CBX8
30.9935	31.0844	30.9771	30.602	30.5541	30.0621	36120000	28574000	31163000	8809700	5509000	3535000	53	1.59785	0.612306	P49790;A0A024QZW7	P49790;A0A024QZW7	Nuclear pore complex protein Nup153	NUP153
24.9888	25.3658	25.2937	24.6813	24.56	24.5731	420930	375150	429650	104790	61639	35768	8	2.13192	0.611321	O60293;G3V1X1	O60293	Zinc finger C3H1 domain-containing protein	ZFC3H1
26.7129	27.1332	27.3544	26.49	26.105	26.7724	1358900	1239500	1516800	468370	228970	340650	14	1.06428	0.61102	O14646;B3KT33;H0Y8V4;A0A087WVF4	O14646	Chromodomain-helicase-DNA-binding protein 1	CHD1
30.5265	30.8911	30.6462	30.1872	30.0679	29.9796	31846000	30320000	29257000	7654200	5078200	5169600	45	2.11201	0.609641	Q14692	Q14692	Ribosome biogenesis protein BMS1 homolog	BMS1
24.9541	25.2503	25.4471	25.0597	25.1231	23.64	467820	721110	1163200	254740	112620	49986	6	0.531897	0.609572	Q9UBB9;Q8N523;A0A024R1I7;B4DPE5;B4DSX8;H0Y4U8;B1AHQ3	Q9UBB9;Q8N523;A0A024R1I7;B4DPE5;B4DSX8	Tuftelin-interacting protein 11	TFIP11
24.4751	24.4007	24.6647	24.6715	24.1765	22.869	263530	1109100	192820	95382	0	0	4	0.486834	0.607805	F2Z2B9;B3KRS1;Q53EQ3;Q9BSJ2;B4DS45	F2Z2B9;B3KRS1;Q53EQ3;Q9BSJ2	Gamma-tubulin complex component 2	TUBGCP2
26.7514	27.0313	26.9069	26.3828	26.2341	26.2587	5926900	4173300	3911000	1299000	885010	904950	10	2.53724	0.604642	Q8NFW8;Q53GF0;F5H296;F5GYM0	Q8NFW8;Q53GF0	N-acylneuraminate cytidylyltransferase	CMAS
31.6328	31.8381	31.6737	31.2745	31.1334	30.9298	406460000	301280000	291630000	89062000	66711000	68843000	18	2.15617	0.602297	Q5JR94;P62241;Q5JR95;Q9BS10	Q5JR94;P62241;Q5JR95;Q9BS10	40S ribosomal protein S8	RPS8
27.3659	27.7054	27.7348	27.345	26.869	26.8043	3583400	3890200	4739400	1259000	627030	509910	19	1.34274	0.595899	X5D2J9;Q499G6;X5D939;X5DNP5;A8K9W7;X5DR09;P78347;B4DH52;X5D7Q9;B4DRA9;A0A0A0VEB4;B4DM07;C9J6M0;A0A087WW90;A0A0D9SF80;Q86UP8;Q6EKJ0;A0A0A0MSY2	X5D2J9;Q499G6;X5D939;X5DNP5;A8K9W7;X5DR09;P78347;B4DH52	General transcription factor II-I	GTF2I
26.5992	27.0191	26.8126	26.5161	26.154	25.9745	12541000	11408000	13819000	3267100	2586700	2427100	7	1.38771	0.595438	Q9BRU9;G3XAM4;E5RGP0;E5RH13;E5RIC4	Q9BRU9	rRNA-processing protein UTP23 homolog	UTP23
29.1519	29.3365	29.1856	28.7513	28.6671	28.4763	12225000	9592800	7506900	2867800	1791100	1339800	26	2.40564	0.593098	P35251;Q14756;A0A1W2PP02;H0Y8U4;Q14297;H0Y9P8	P35251;Q14756	Replication factor C subunit 1	RFC1;LLDBP
23.9315	24.6002	24.1841	24.3986	23.3747	23.1691	1998200	2032800	1704700	751830	477310	557850	2	0.622105	0.591139	O14925;Q5SRD1;B4DDK6;B1APJ0;B7ZB25;B4DI18	O14925;Q5SRD1;B4DDK6;B1APJ0;B7ZB25;B4DI18	Mitochondrial import inner membrane translocase subunit Tim23;Putative mitochondrial import inner membrane translocase subunit Tim23B	TIMM23;TIMM23B
30.1885	30.489	30.1901	29.7347	29.7259	29.6382	199270000	176690000	152840000	48799000	27869000	36964000	8	2.31269	0.589611	C9JXB8;C9JNW5;V9HW01;P83731	C9JXB8;C9JNW5;V9HW01;P83731	60S ribosomal protein L24	RPL24
26.4875	26.5853	26.3568	26.0243	25.8297	25.811	3171800	2291900	2671100	666820	404260	383280	8	2.45988	0.588224	Q9UJX2;D6RBY8;D6RCF8;H0Y936	Q9UJX2	Cell division cycle protein 23 homolog	CDC23
32.2525	32.5203	32.4197	31.8811	31.8308	31.7184	356440000	323130000	327130000	78594000	69709000	60307000	31	2.51491	0.587363	P36578;Q59GY2;B4DMJ6;Q53G74;H3BM89;B4DFI6;B4DMJ2;H3BTP7;H3BU31;B4DP82	P36578;Q59GY2;B4DMJ6;Q53G74;H3BM89;B4DFI6;B4DMJ2	60S ribosomal protein L4	RPL4
25.1075	25.364	25.281	24.797	24.5768	24.6169	1141900	1181400	1171000	232040	110270	140080	7	2.35385	0.587224	Q2TAK8;J3KNX4;D6W5Y8;A0A0D9SGJ8;K7EP97;K7ES53;Q13108	Q2TAK8;J3KNX4;D6W5Y8;A0A0D9SGJ8	PWWP domain-containing protein MUM1	MUM1
31.2204	31.5273	31.4022	31.1131	30.7524	30.5268	290870000	228000000	256480000	90957000	58900000	54005000	12	1.41659	0.58588	Q9BTQ7;P62829;A0A024R1Q8;J3KT29;C9JD32;J3KTJ3;B9ZVP7;J3QQT9;A4D142	Q9BTQ7;P62829;A0A024R1Q8;J3KT29;C9JD32;J3KTJ3;B9ZVP7	60S ribosomal protein L23	RPL23
26.1361	26.5501	26.8567	25.7925	26.0563	25.9416	3785200	4748900	3570500	756050	603040	456930	7	1.23408	0.584203	Q9NY61;A0A087WW41	Q9NY61	Protein AATF	AATF
23.7312	24.03	24.4524	23.261	22.8966	24.3071	215710	169650	178020	0	0	0	4	0.546572	0.582967	Q9NVI1;B7ZMF2;F8W7R3;B3KNW8;H3BP78;H3BS60;H3BQE2;H3BT54;H3BMG4	Q9NVI1;B7ZMF2;F8W7R3;B3KNW8;H3BP78	Fanconi anemia group I protein	FANCI
26.4611	26.6151	26.6403	26.1835	26.3188	25.4693	3654600	2859200	3203100	1018500	535720	385610	10	1.0132	0.581641	Q9UKX7;A0A024R4X7;B4E2D3;B0QY21	Q9UKX7;A0A024R4X7	Nuclear pore complex protein Nup50	NUP50
28.9987	29.1435	29.0417	28.742	28.5474	28.16	21982000	16832000	16904000	5756100	3626900	2267500	12	1.51483	0.578143	Q5T3I0;A0A0A0MRK1;A8KAG1;E9PAV9;F8W895;E9PPY4;F2Z3C6;B4DVU2	Q5T3I0;A0A0A0MRK1;A8KAG1;E9PAV9;F8W895;E9PPY4;F2Z3C6;B4DVU2	G patch domain-containing protein 4	GPATCH4
24.0682	24.3633	24.2802	24.2933	23.4243	23.266	313000	309550	323520	103260	57598	0	4	0.804066	0.575998	A4D2N7;Q9H9J4;A4D2N6;E7EWZ4;C9JPC9;B4DWG7	A4D2N7;Q9H9J4;A4D2N6;E7EWZ4;C9JPC9;B4DWG7	Ubiquitin carboxyl-terminal hydrolase;Ubiquitin carboxyl-terminal hydrolase 42	USP42
26.5351	23.5442	23.4443	23.891	24.0698	23.8436	49965000	2849300	543690	2589500	2212400	2577500	2	0.219708	0.573079	Q5TA79;Q5TA82;Q5TA81;O14633;REV__Q5TA79;Q5T7P3	Q5TA79;Q5TA82;Q5TA81;O14633;REV__Q5TA79;Q5T7P3	Late cornified envelope protein 2A;Late cornified envelope protein 2D;Late cornified envelope protein 2C;Late cornified envelope protein 2B;Late cornified envelope protein 1B	LCE2A;LCE2D;LCE2C;LCE2B;LCE1B
27.0476	27.3265	27.2625	26.8142	26.5516	26.5579	1525500	1264900	1573100	441320	265940	288740	14	2.03941	0.570944	Q9H1A4;H0Y564;F8WAS1;B3KM59	Q9H1A4;H0Y564	Anaphase-promoting complex subunit 1	ANAPC1
24.6834	24.3194	24.4642	25.0572	23.3916	23.3113	931500	825770	841510	506550	89640	370680	4	0.418762	0.568961	Q96I25;Q5W009;Q5W011;Q5W010;Q5W012	Q96I25;Q5W009	Splicing factor 45	RBM17
24.3582	24.4133	24.3964	24.3047	22.6984	24.4635	2025900	971210	1705600	384520	165380	0	3	0.430009	0.567109	Q9BRG8;B1AVT0;P49760;A8K7I0;B7Z8N6;A4D151;A4D150	Q9BRG8;B1AVT0;P49760;A8K7I0;B7Z8N6	Dual specificity protein kinase CLK2	CLK2
29.9524	30.1695	29.9352	29.4877	29.6248	29.2489	30334000	26303000	26793000	7573400	6808600	5762800	27	1.87837	0.565259	Q5T0F3;Q13823;B4DPI9;H0YG10	Q5T0F3;Q13823	Nucleolar GTP-binding protein 2	GNL2
28.8193	29.2669	29.2731	28.5871	28.51	28.5672	20404000	19789000	22988000	3006200	3249200	4200100	15	1.68775	0.564968	Q5SY16	Q5SY16	Polynucleotide 5-hydroxyl-kinase NOL9	NOL9
24.4859	24.5137	24.4399	24.1954	23.656	23.8946	2424200	1706600	1763900	654080	0	210520	2	1.63632	0.564523	A0A1U9X7J2;P67870;N0E4C7;Q5SRQ6;N0E466;Q5SRQ3;N0E472;A0A0G2JM12	A0A1U9X7J2;P67870;N0E4C7;Q5SRQ6;N0E466;Q5SRQ3;N0E472;A0A0G2JM12	Casein kinase II subunit beta	CSNK2B;CSNK2B-LY6G5B-1181;CSNK2B-LY6G5B--991
30.5811	30.7623	30.5288	30.0955	30.1821	29.9046	15494000	12533000	9894700	3564600	2463200	2224600	53	2.18658	0.563359	A0A024R5M9;Q14980;Q4LE64;A0A087WY61;Q59HB8;Q7Z757;Q96HN5;H0YFY6;Q9UNL7;A0A024R5G4;K4DIE0;Q3SYK8;F5H6Y5;F5H4J1;A8K394;G1UI36;F5H2F3;F5H3L6;F5H0Z7;F5H763;Q86XH4;F8W6T3;F5H1L0;F5GZW1;F5GWK2;F5H073;F5H068	A0A024R5M9;Q14980;Q4LE64;A0A087WY61;Q59HB8;Q7Z757;Q96HN5;H0YFY6	Nuclear mitotic apparatus protein 1	NUMA1;NUMA1 variant protein
31.439	31.5501	31.6246	31.0479	31.0637	30.815	125900000	92480000	107660000	29716000	21297000	19156000	35	2.3597	0.562345	A0A024R2Z6;Q9BVP2;C9JZT7;B4DMU5;C9JYH9	A0A024R2Z6;Q9BVP2	Guanine nucleotide-binding protein-like 3	GNL3
27.1339	24.8396	24.8875	24.4235	24.6954	26.0665	9206300	1009100	1321000	342720	316340	542730	11	0.241614	0.558515	P63244;E9KL35;D6RHH4;J3KPE3;D6R9Z1;D6RAC2;D6R9L0;D6RBD0;D6RFX4;H0YAF8;B4DVD2;H0Y8W2;D6REE5;D6RFZ9;H0YAM7;D6RAU2;E9PD14;B4E0C3;H0Y8R5;D6RGK8;D6RF23;D6R909;B4DWC6;D6RHJ5;D6RDI0;H0Y9P0	P63244;E9KL35;D6RHH4;J3KPE3;D6R9Z1;D6RAC2;D6R9L0;D6RBD0;D6RFX4;H0YAF8;B4DVD2;H0Y8W2;D6REE5;D6RFZ9;H0YAM7	Guanine nucleotide-binding protein subunit beta-2-like 1	GNB2L1
27.0578	27.2241	27.4647	26.7004	26.8597	26.5174	3648300	4269100	3798900	944280	480440	476710	12	1.64722	0.556341	G5EA36;P30260;B4DL80;I0EZ68;I3L328;F6QPS0;B4DRN1;I3L2Z8;I3L394;I3L3H6;I0EZ72;I3L225	G5EA36;P30260;B4DL80	Cell division cycle protein 27 homolog	CDC27
30.1707	30.4032	30.2919	29.766	29.8598	29.575	43491000	36907000	38170000	8359800	5943700	7878300	27	2.17675	0.555002	Q14684;Q6PJM8	Q14684	Ribosomal RNA processing protein 1 homolog B	RRP1B
30.2783	30.3906	30.4377	29.8338	29.8778	29.7337	12749000	7842300	12472000	2887700	2089400	1826000	40	3.01672	0.553745	B2RWN5;Q9H583;Q5T3Q7;A0A024R3R7;A2VDI1;B4E263;B7ZAU8;B3KWS1;Q8N7L7;Q6P664;Q96ES5	B2RWN5;Q9H583;Q5T3Q7;A0A024R3R7;A2VDI1;B4E263;B7ZAU8;B3KWS1	HEAT repeat-containing protein 1	HEATR1
30.6455	30.9944	30.7605	30.4128	30.3819	29.9521	53972000	48529000	44602000	15489000	9972700	6682900	30	1.4202	0.551159	Q14137;A8K3R2;B2RDN4;B4DEN9;Q4G0D9;Q6DKJ9;A0A075B729	Q14137;A8K3R2;B2RDN4;B4DEN9;Q4G0D9;Q6DKJ9	Ribosome biogenesis protein BOP1	BOP1
25.3128	25.6412	25.4792	24.96	24.9362	24.8842	340620	330130	327580	94523	60807	55824	7	2.31723	0.550952	F5GXF5;E7ETD6;Q12830;J3QQK4	F5GXF5;E7ETD6;Q12830	Nucleosome-remodeling factor subunit BPTF	BPTF
30.0079	30.4698	30.1417	29.7634	29.5729	29.6336	197110000	182720000	195090000	67213000	45570000	54595000	9	1.68436	0.549826	Q6IAX2;P46778;G3V1B3;M0R181;Q59GK9;M0R3I5	Q6IAX2;P46778;G3V1B3;M0R181;Q59GK9	60S ribosomal protein L21	RPL21
28.474	28.963	28.8194	28.0686	28.1648	28.374	9357000	10428000	10079000	2344600	1861800	2036700	25	1.4899	0.549669	Q9Y4W2;B7Z381;B3KUJ7;B3KNR6;Q6ZNR3	Q9Y4W2	Ribosomal biogenesis protein LAS1L	LAS1L
24.7465	24.9418	24.9503	24.2825	24.2039	24.5063	1206000	790330	1097100	219790	196620	61446	4	2.08858	0.548651	Q99741;B2R935;A0A024R1S2;J3QLN7	Q99741;B2R935;A0A024R1S2	Cell division control protein 6 homolog	CDC6
25.5177	25.9388	25.4933	25.1547	25.1327	25.0325	1101400	1105600	1057400	284160	178690	207090	7	1.65659	0.543293	Q7L590;Q5T670	Q7L590;Q5T670	Protein MCM10 homolog	MCM10
29.5023	25.8536	25.8637	25.9103	26.3492	27.3305	28326000	814440	1250100	807370	791830	2279600	20	0.158479	0.543179	V9HWF4;P00558;B4E1H9;B4DHB3;B4DHM5;B4DWQ3;P07205;A0A140VJR3;V9HW85	V9HWF4;P00558;B4E1H9;B4DHB3	Phosphoglycerate kinase 1;Phosphoglycerate kinase	PGK1
30.7351	30.8335	30.6885	30.3148	30.1941	30.1221	285970000	247030000	256900000	95447000	61030000	52151000	2	2.80965	0.541992	Q6IPH7;P50914;A8K7N0;E7EPB3;A0PJ62;B7Z6S8	Q6IPH7;P50914;A8K7N0;E7EPB3;A0PJ62;B7Z6S8	60S ribosomal protein L14	RPL14
23.9338	24.2248	24.2577	22.5179	24.3958	23.8857	413510	360280	366220	46103	64841	32712	3	0.400213	0.53897	H0Y9V7;B4E295;P98194;B4E2Q0;H0Y8X9;Q59G44;H0Y9S7	H0Y9V7;B4E295;P98194;B4E2Q0;H0Y8X9;Q59G44	Calcium-transporting ATPase type 2C member 1	ATP2C1
24.389	24.4312	24.3859	24.1056	23.9487	23.5382	469060	319020	561620	120040	43701	28896	4	1.4695	0.537897	Q6ZNB6;B1Q2B0;Q8J028	Q6ZNB6;B1Q2B0;Q8J028	NF-X1-type zinc finger protein NFXL1	NFXL1;URCC5;HOZFP
24.768	25.1758	24.9891	24.838	24.7792	23.7042	1786400	2323800	2677900	906600	565390	161940	4	0.624675	0.537191	B7Z6T7;Q8NBM4;A8K2S7;A0A024RE02;B3KW74;X6R5E5	B7Z6T7;Q8NBM4;A8K2S7;A0A024RE02;B3KW74;X6R5E5	Ubiquitin-associated domain-containing protein 2	UBAC2;PHGDHL1
27.7182	28.0673	28.0429	27.5057	27.4652	27.2523	1084600	1027900	1131300	244720	201850	157080	30	1.75556	0.535072	F2Z2U4;Q9Y4A5;Q59FH1;H0Y4W2;C9K0N1	F2Z2U4;Q9Y4A5;Q59FH1;H0Y4W2	Transformation/transcription domain-associated protein	TRRAP
24.5888	25.2244	25.1011	24.4993	24.6687	24.1416	524970	763990	762130	76037	90670	38414	10	1.00782	0.534855	Q9H2U1;E7EWK3;B7Z8P5;H7C514;H7C5F5;A0A0G2JQU7;B4DKW2;Q6P158	Q9H2U1;E7EWK3;B7Z8P5	Probable ATP-dependent RNA helicase DHX36	DHX36
29.8371	30.4268	30.1856	29.7695	29.6908	29.3888	79293000	102420000	81204000	30513000	15018000	13477000	12	1.21233	0.533501	Q6DKI1;A0A024RD36;R4GMU7;B7Z4G0;B3KMP5;A8K5J5	Q6DKI1;A0A024RD36;R4GMU7;B7Z4G0	60S ribosomal protein L7-like 1	RPL7L1
30.3598	30.6318	30.648	30.0705	29.9563	30.018	11158000	10095000	10288000	2307800	1528400	1965000	53	2.23411	0.531595	O75691;B4DN27	O75691	Small subunit processome component 20 homolog	UTP20
24.9313	24.9252	23.921	24.5198	23.2389	24.4269	3584400	2452300	1392400	954440	0	120350	3	0.42615	0.530602	A0A024RAV5;Q14014;P01116;L7RSL8;I1SRC5;P78460;Q96T27;Q7KZ06;Q71SP6;G3V4K2;G3V5T7;Q92468;Q14015;X5D945;Q5U091;P01112;P01111	A0A024RAV5;Q14014;P01116;L7RSL8;I1SRC5	GTPase KRas;GTPase KRas, N-terminally processed	KRAS
23.7469	23.8984	23.3766	23.763	23.2855	22.3885	1093000	955380	547390	379910	215190	0	3	0.540341	0.528288	Q9HBH1;A0A024R6Y3	Q9HBH1;A0A024R6Y3	Peptide deformylase, mitochondrial	PDF
30.0484	27.9023	28.2044	28.7294	27.8874	27.9628	4798500	581070	960960	601370	164530	206150	3	0.294447	0.52517	A0A075B730;A0A087X1U6	A0A075B730;A0A087X1U6
26.6877	27.313	26.9739	26.3786	26.6776	26.3498	2633100	4057200	2505300	571530	422610	226040	7	1.1766	0.522826	Q9Y5Q9;F8WC64;H7C0C0;H0YFI7	Q9Y5Q9	General transcription factor 3C polypeptide 3	GTF3C3
25.0784	25.0827	25.2593	24.9617	23.7188	25.1776	1089600	933750	862120	214090	135190	187980	9	0.495615	0.520758	P33993;C6EMX8;B2RBA6;A0A0S2Z4A5;B3KUD7;B4DDF5;Q9H4N9;A0A0S2Z441;C9J8M6	P33993;C6EMX8;B2RBA6;A0A0S2Z4A5;B3KUD7;B4DDF5;Q9H4N9	DNA replication licensing factor MCM7	MCM7
29.9684	30.0874	29.9435	29.4816	29.6834	29.2726	23471000	10568000	13672000	4854400	3040600	2910700	29	1.83211	0.520601	Q12769;G3V198;E9PR16;E9PSI3	Q12769;G3V198;E9PR16	Nuclear pore complex protein Nup160	NUP160
24.7933	24.5089	24.3834	24.0336	23.7743	24.3196	2584700	1286000	1324700	215900	117670	384430	4	1.22746	0.519398	O75396;A0A087X1A9	O75396;A0A087X1A9	Vesicle-trafficking protein SEC22b	SEC22B
26.7403	26.7754	26.8309	26.1588	26.2821	26.3512	14329000	8463600	13529000	1810800	499960	814280	6	2.94678	0.518202	B1APM4;P35610;B7ZAT6	B1APM4;P35610;B7ZAT6	Sterol O-acyltransferase 1;O-acyltransferase	SOAT1
31.6751	32.1739	31.713	31.4672	31.3954	31.1456	496990000	532440000	387210000	147570000	94344000	93272000	10	1.29413	0.517967	Q07020;A0A024QZD1;J3QQ67;G3V203;Q0QEW2;H0YHA7;F8VYV2;B4DDY5;A0A075B7A0;F8VUA6;F8VXR6	Q07020;A0A024QZD1;J3QQ67;G3V203;Q0QEW2;H0YHA7;F8VYV2;B4DDY5;A0A075B7A0;F8VUA6	60S ribosomal protein L18	RPL18
31.9245	32.2461	32.1859	31.7143	31.6238	31.4704	351960000	299300000	294260000	87261000	62202000	56690000	20	1.87718	0.516003	Q8TBK5;Q8N5Z7;Q02878;A0A024RBK3;Q9HBB3;B2R4K7;B4DRX3;F8VZ45;U3KQR5;F8VZA3;F8VWR1;F8VU16;F8VR69;B4DNY8	Q8TBK5;Q8N5Z7;Q02878;A0A024RBK3;Q9HBB3;B2R4K7;B4DRX3	60S ribosomal protein L6	RPL6
32.58	32.8411	32.7883	32.2513	32.2667	32.1435	32516000	27649000	27134000	8537900	5577500	5431200	135	2.36308	0.515957	P78527;B4DL41;F5GX40;H0YG84	P78527	DNA-dependent protein kinase catalytic subunit	PRKDC
27.7361	27.9131	27.8742	27.1923	27.4019	27.383	3567900	2536600	2797900	598790	547890	465240	22	2.41223	0.515402	P26358;A0A024R7E3;I6L9H2;Q59FP7;B3KVA0;K7ENW7;K7EIZ6;K7EMU8;K7EJL0;K7ENQ6	P26358;A0A024R7E3;I6L9H2;Q59FP7	DNA (cytosine-5)-methyltransferase 1;Cytosine-specific methyltransferase	DNMT1
30.9641	31.264	30.9394	30.6743	30.6509	30.312	281480000	290780000	205990000	75687000	53061000	39966000	13	1.50483	0.51011	Q96DV6;P62753;A2A3R6;A2A3R5;A2A3R7;Q9BZU1	Q96DV6;P62753;A2A3R6;A2A3R5	40S ribosomal protein S6	RPS6
29.5056	29.6936	29.7556	29.2148	29.3093	28.9066	30495000	22489000	28681000	8615800	6363000	4437300	24	1.62495	0.508013	P42696;A2A2V2;Q5TCT4;H7C5M1	P42696;A2A2V2	RNA-binding protein 34	RBM34
26.06	26.5665	26.2846	25.7404	25.8643	25.7884	851220	1306600	1380400	191500	209780	271160	10	1.54549	0.506019	A8K2V6;Q9ULG1;A0A024R9R7;H0YMN5;Q6N074;A0A087X0U7;Q9NUK2	A8K2V6;Q9ULG1;A0A024R9R7;H0YMN5	DNA helicase INO80	INO80
25.6472	25.5166	25.1653	25.0208	25.0777	24.7209	2698400	1045200	1635600	407950	259840	86134	9	1.29908	0.503192	P07948;B4DQ79;A8K379;Q6NUK7;E5RJ37;A8K4G3;H0Y3C5;P08631;J3KPD6;F6SF04	P07948;B4DQ79;A8K379;Q6NUK7	Tyrosine-protein kinase Lyn	LYN
30.3831	30.2899	30.1952	29.8217	29.776	29.761	75804000	49246000	51337000	19477000	14506000	15190000	11	3.0346	0.503138	P15880;H0YEN5;Q8N5L9;Q3KQT6;Q6IPX5;Q8J014;E9PQD7;Q9BSW5;I3L404;E9PM36;O60249;E9PMM9;Q8NI62;E9PPT0;Q8NI61;A4D0Y7;Q6ZNN8;D3DU83	P15880;H0YEN5;Q8N5L9;Q3KQT6;Q6IPX5;Q8J014;E9PQD7;Q9BSW5;I3L404;E9PM36	40S ribosomal protein S2	RPS2;rps2
31.7648	32.0628	31.9417	31.3316	31.5308	31.3986	116370000	92497000	94418000	27199000	24980000	21521000	33	2.06764	0.50278	Q8IY81;B4DKU3;J3KS36	Q8IY81;B4DKU3	pre-rRNA processing protein FTSJ3	FTSJ3
24.3851	24.7183	24.7312	24.3608	24.7656	23.2034	374750	473960	463790	188700	173310	127730	3	0.448016	0.501623	Q9H7N4;A0A024QZH6	Q9H7N4;A0A024QZH6	Splicing factor, arginine/serine-rich 19	SCAF1
24.4055	24.4697	24.5584	23.9697	22.9862	24.9749	1258900	1072200	1257000	0	0	256340	2	0.363095	0.500912	V9HW63;Q13162;H7C3T4;A6NG45	V9HW63;Q13162;H7C3T4	Peroxiredoxin-4	PRDX4
29.5152	29.8497	29.6597	29.2702	29.2075	29.0492	29534000	21248000	21948000	5098500	4288500	4552900	24	1.88564	0.49925	Q9BSC4;B4DS83;H7C1Z3	Q9BSC4;B4DS83	Nucleolar protein 10	NOL10
25.2914	25.5993	25.7956	25.4797	25.69	24.0262	4106100	3826200	4261500	1350400	1060400	637170	4	0.384869	0.496791	C9JTA6;A0A0G2JSE9;B4DRT1;Q12824;Q86WI7;A0A0U1RRB8;B4E117;Q9H836;G5E975;Q86WI8;A0A0U1RQQ2;B5MCL5	C9JTA6;A0A0G2JSE9;B4DRT1;Q12824;Q86WI7;A0A0U1RRB8;B4E117;Q9H836;G5E975;Q86WI8;A0A0U1RQQ2;B5MCL5	SWI/SNF-related matrix-associated actin-dependent regulator of chromatin subfamily B member 1	SMARCB1
27.1252	27.3212	27.6183	26.8583	27.1283	26.5901	1009600	654300	1165900	259150	244030	95284	28	1.10345	0.496035	E1NZA1;Q92616;A0A024RBS1;B4DM32	E1NZA1;Q92616;A0A024RBS1	Translational activator GCN1	PRIC295;GCN1L1
23.7753	24.0622	24.7134	23.9675	22.8099	24.2861	1312400	1034700	1873100	405600	326870	280190	3	0.39753	0.495843	Q9H5V9;D3DSW1	Q9H5V9	UPF0428 protein CXorf56	CXorf56
31.8765	32.1285	32.0688	31.6536	31.5908	31.3483	138260000	94795000	108960000	38367000	24324000	21407000	38	1.83088	0.493699	Q9BZE4;D2CFK9;Q8N4P8;Q53GS0;B4DHR2;O60747;Q5T3R7	Q9BZE4;D2CFK9;Q8N4P8;Q53GS0;B4DHR2	Nucleolar GTP-binding protein 1	GTPBP4
23.5261	23.4206	23.0727	22.2579	22.8288	23.453	225770	212990	185680	0	0	0	3	0.593798	0.493197	Q96DY7	Q96DY7	Mdm2-binding protein	MTBP
25.0206	24.8844	24.7641	24.2404	24.6805	24.2706	794600	943210	591510	201830	172550	62792	5	1.43087	0.492527	B2RDX0;A8K7Z9;A0A024R6R1;Q8NEM2	B2RDX0;A8K7Z9;A0A024R6R1;Q8NEM2	SHC SH2 domain-binding protein 1	SHCBP1
23.768	23.7726	23.9255	24.0474	22.8932	23.0501	1656800	2123300	1936200	882480	265260	309960	3	0.603355	0.491789	D9ZGF5;P09038;A0A0A0MQV6;A0A087WUF6	D9ZGF5;P09038;A0A0A0MQV6;A0A087WUF6	Fibroblast growth factor 2	FGF2
27.6897	27.9047	27.9107	27.3016	27.3348	27.3937	15850000	8760800	9822600	2014800	1142200	1445500	12	2.49979	0.491666	P35250;B5BUD2;Q75MT5;A0A087WVY3;H7C5P4;H7C5Q7;F8WC37;H7C5A0;H7C5G4;H7C5P1;H7C5S7	P35250;B5BUD2;Q75MT5;A0A087WVY3	Replication factor C subunit 2	RFC2
24.6891	24.0298	24.4937	23.7115	23.8981	24.1388	1656600	1229700	1472500	246040	200830	274370	4	0.989036	0.488066	F5HRF8;Q7Z2E3;F8W6G5;A0A0A0MRW7;C9J8U3;C9JZ40;F8WBD6;E7EUY4;F8WBM3;Q6JV79;E7EVB7	F5HRF8;Q7Z2E3;F8W6G5;A0A0A0MRW7;C9J8U3;C9JZ40	Aprataxin	APTX
27.5231	26.6139	27.301	26.7056	26.5973	26.6733	2768900	1698800	3624200	1269200	643780	1318900	11	0.818903	0.48725	P13010;Q53T09;C9JZ81;Q53TC2;H7C0H9	P13010;Q53T09	X-ray repair cross-complementing protein 5	XRCC5
30.575	31.0042	30.9158	30.4645	30.3715	30.2009	55024000	58475000	63593000	20219000	13295000	11609000	26	1.48241	0.486014	Q9Y5J1;B2RAX6;J3KSR7;J3QRG0;J3QR85;J3QLD6;F6VJE8	Q9Y5J1;B2RAX6	U3 small nucleolar RNA-associated protein 18 homolog	UTP18
24.1178	24.8267	24.495	24.2623	23.3448	24.3752	1345800	2044800	1920500	524740	291570	361960	3	0.559307	0.485734	A3KFJ1;Q5QPD4;A3KFJ0;O14965;B2R6Z3;Q5QPD2;B4DX16;A3KFJ2;Q5QPD1	A3KFJ1;Q5QPD4;A3KFJ0;O14965;B2R6Z3;Q5QPD2;B4DX16	Aurora kinase A	AURKA
24.6749	24.784	24.9073	25.0891	25.2762	22.5463	765380	1447800	1558100	928010	732390	300700	3	0.213165	0.484894	Q6LES8;Q00059;E5KSX8;E5KSU5;H7BYN3	Q6LES8;Q00059;E5KSX8;E5KSU5	Transcription factor A, mitochondrial	TFAM
32.4325	32.6283	32.5412	32.1119	32.1568	31.8787	340050000	282430000	290740000	92498000	65891000	52768000	28	2.03107	0.484851	P39023;Q8TBW1;Q96QL0;Q9NY85;G5E9G0;B3KS36;Q9BT63;Q49AJ9;H7C422;B5MCW2;H7C3M2;B4DN06;F8WCR1;Q92901;B2R7Y3	P39023;Q8TBW1;Q96QL0;Q9NY85;G5E9G0;B3KS36;Q9BT63;Q49AJ9;H7C422;B5MCW2;H7C3M2	60S ribosomal protein L3	RPL3;rpl3
31.9981	32.3615	32.2475	31.7828	31.7965	31.5824	460610000	403430000	421060000	117210000	90366000	89639000	23	1.70893	0.481808	P62424;Q9BY74;Q5T8U2;Q5T8U3	P62424;Q9BY74;Q5T8U2;Q5T8U3	60S ribosomal protein L7a	RPL7A;RP-L7a
25.2673	25.303	25.3487	24.7393	24.7513	24.9852	1654000	1339800	1558100	315380	217960	187070	1	2.34794	0.481107	A0A0A0MSK5;Q5JTV8;H0YD16;H0Y4R4;H0YDU3	A0A0A0MSK5;Q5JTV8;H0YD16	Torsin-1A-interacting protein 1	TOR1AIP1
28.8624	29.2068	29.1739	28.6831	28.6796	28.4402	20404000	19106000	20216000	5770400	3826600	3815400	17	1.61549	0.480063	O43159;E9PPY3;E9PPP6	O43159;E9PPY3	Ribosomal RNA-processing protein 8	RRP8
26.5028	26.8409	26.8471	26.1711	26.348	26.2345	1689900	1699900	1568800	265990	255340	292440	17	1.73139	0.479025	O95347;B7ZLZ7;A8K984;A0A024R158;B3KMB1;Q2KQ72;Q05BV1;Q6IPS5;B3KM27;Q05D74;A0JLM9;Q32Q15;Q6P712;Q7Z2X1;Q5T821;A0A0C4DGE5	O95347;B7ZLZ7;A8K984;A0A024R158;B3KMB1;Q2KQ72;Q05BV1	Structural maintenance of chromosomes protein 2;Structural maintenance of chromosomes protein	SMC2
26.2215	26.3305	26.2736	25.8831	25.8825	25.63	2832300	2139800	2128100	743740	513760	379450	8	2.21523	0.476671	E7EQY4;E7EV10;Q9BTC8;E9PCS8;D6W5A2;Q53RX8;E9PF88;Q53SC0;Q53QZ9	E7EQY4;E7EV10;Q9BTC8;E9PCS8;D6W5A2;Q53RX8	Metastasis-associated protein MTA3	MTA3;tmp_locus_6
29.5687	30.0144	29.962	29.4546	29.4166	29.2452	68171000	56258000	71283000	23001000	17138000	15581000	5	1.43198	0.476239	Q7Z7K6	Q7Z7K6	Centromere protein V	CENPV
30.26	30.6944	30.4964	30.0144	30.1872	29.8217	169840000	158040000	145810000	45744000	41584000	30162000	10	1.35577	0.475845	Q5QTS3;Q53H34;P40429;Q9BSQ6;M0QYS1;Q8J015;Q0VGL3;Q6NVV1;B4DNC8;M0QZU1;A0A096LPE0	Q5QTS3;Q53H34;P40429;Q9BSQ6;M0QYS1;Q8J015;Q0VGL3;Q6NVV1	60S ribosomal protein L13a;Putative 60S ribosomal protein L13a-like MGC87657	RPL13A;RPL13a
25.1686	25.557	25.6251	25.1464	24.7356	25.0475	476030	584830	642910	114240	68090	122030	8	1.18125	0.47374	Q92766;A0A024QZU8;C9JU34	Q92766;A0A024QZU8;C9JU34	Ras-responsive element-binding protein 1	RREB1
26.2543	26.3399	26.5812	26.0475	26.112	25.5969	2339000	1859900	2049700	636560	476200	240280	8	1.17482	0.47298	Q86YP4;A0A024R7K7;A0A024R7M6;B4DKZ7;B4E0Q6	Q86YP4;A0A024R7K7;A0A024R7M6;B4DKZ7;B4E0Q6	Transcriptional repressor p66-alpha	GATAD2A
23.9435	23.4712	24.0049	22.7715	23.7498	23.4826	174670	141880	204530	0	90547	0	5	0.630471	0.471888	Q03468;A0JP10;B4DZN6;D6R9X7;Q59FF6;A8K4Q3	Q03468;A0JP10;B4DZN6	DNA excision repair protein ERCC-6	ERCC6
32.0297	32.1998	32.1777	31.7329	31.7503	31.5086	90883000	63100000	79672000	25524000	17631000	15015000	25	2.12488	0.471805	Q9H0A0;A0A087WV29;E9PMU0;E9PJN6	Q9H0A0;A0A087WV29	N-acetyltransferase 10	NAT10
28.0597	28.3736	28.3057	27.99	27.8337	27.5068	44958000	35169000	43469000	24083000	9159000	8227000	8	1.2848	0.4695	Q66K47;G3V5S9;G3V1S4;Q9Y324;Q4FZ45;G3V2M5	Q66K47;G3V5S9;G3V1S4;Q9Y324;Q4FZ45	rRNA-processing protein FCF1 homolog	FCF1;DKFZp686O2396
26.5458	26.4742	26.9647	26.4365	26.2203	25.9214	4969700	3709200	6244700	1851500	1054000	955330	3	1.02968	0.468786	O15143;A4D275;C9JBJ7;C9K057;C9J4Z7;F8VXW2;C9JEY1;C9JQM8;C9JFG9;C9J6C8;C9JM51;F8WEB3;C9JTT6	O15143;A4D275	Actin-related protein 2/3 complex subunit 1B	ARPC1B
28.3995	29.2503	28.9922	28.7296	28.1198	28.3868	19328000	33885000	24637000	9386000	4214800	6232400	2	0.694058	0.468576	Q9UPN1;F8VYE8;P36873;A0A024RBP2;F8W0W8;F8VR82;A0A087WYY5	Q9UPN1;F8VYE8;P36873;A0A024RBP2;F8W0W8;F8VR82	Serine/threonine-protein phosphatase;Serine/threonine-protein phosphatase PP1-gamma catalytic subunit	PPP1CC
28.603	28.8685	28.8418	28.3409	28.3654	28.206	10373000	7485600	7154700	1961300	1227100	1281100	30	2.05423	0.467061	Q8IY37;F5H3Y4;Q6IPP7	Q8IY37;F5H3Y4	Probable ATP-dependent RNA helicase DHX37	DHX37
23.873	24.1181	23.3213	23.5558	22.2908	24.0704	423360	346420	183130	68744	20975	29447	5	0.330961	0.465143	Q9NYW8	Q9NYW8	RB-associated KRAB zinc finger protein	RBAK
26.4201	26.8077	26.9748	26.3905	26.1505	26.2683	3055300	2820400	3481200	1054200	551570	460130	10	1.22373	0.464415	Q8WUA4;Q53SY8;H0Y4Q6;Q53QN0;A0A087WZD8;H7C318;H7C1A9;C9JNH7;H7C3X9	Q8WUA4;Q53SY8;H0Y4Q6;Q53QN0;A0A087WZD8	General transcription factor 3C polypeptide 2	GTF3C2
29.3616	29.6835	29.6361	29.0968	29.1809	29.0107	12373000	9908000	12054000	2895400	2335500	1801700	32	1.84772	0.464281	E9PCY5;Q02880;B4DKD0;Q71UH4;Q59H80;Q6W6M6	E9PCY5;Q02880;B4DKD0;Q71UH4	DNA topoisomerase 2;DNA topoisomerase 2-beta	TOP2B
31.8473	32.2842	32.2653	31.818	31.7605	31.4334	210120000	207740000	223370000	58519000	48574000	42291000	23	1.16563	0.461621	Q8TDN6;A0JLQ5;B4E0B8;Q9NUW4;Q05CP8	Q8TDN6;A0JLQ5;B4E0B8;Q9NUW4	Ribosome biogenesis protein BRX1 homolog	BRIX1;BXDC2;BRIX
26.7729	27.4911	27.4566	26.8092	26.7661	26.7638	12926000	14270000	15461000	4068700	2524900	3245200	8	0.917833	0.460491	Q9NV31;Q96Q46	Q9NV31	U3 small nucleolar ribonucleoprotein protein IMP3	IMP3
30.1432	30.6217	30.6359	30.2481	29.8686	29.903	114720000	160300000	149380000	45749000	27546000	27184000	14	1.07	0.460393	Q53GD7;O75494;A0A0S2Z504;Q5JRI1;B3KNY6;Q6IQ42;Q8WXF0;R4GMP8	Q53GD7;O75494;A0A0S2Z504;Q5JRI1	Serine/arginine-rich splicing factor 10	SRSF10
30.0924	30.3025	30.2654	29.7945	29.6449	29.8468	115470000	96097000	96059000	29908000	17203000	18739000	17	2.17683	0.458038	P46781;A0A024R4M0;A5D904;B5MCT8;C9JM19;B7Z732;F2Z3C0;A8MXK4	P46781;A0A024R4M0;A5D904;B5MCT8;C9JM19;B7Z732	40S ribosomal protein S9	RPS9
27.4411	27.7276	27.6968	27.0688	27.2777	27.1478	7277700	7650800	8585000	2262400	1557100	1500000	14	1.85645	0.457078	G3XAG1;Q96ME7;B4DES6;B7Z9P6;Q658M0;B4E0X7	G3XAG1;Q96ME7;B4DES6;B7Z9P6;Q658M0;B4E0X7	Zinc finger protein 512	ZNF512;DKFZp666L156
26.8964	27.418	27.211	26.9204	26.6048	26.6302	5614600	4197800	3984600	1884900	902140	1116200	8	1.1777	0.456668	Q5SNT2;H0Y4R5;H0Y994	Q5SNT2;H0Y4R5	Transmembrane protein 201	TMEM201
27.5204	27.8889	27.7679	27.2544	27.3273	27.2328	7324500	5366000	6250100	1505900	1142600	1032800	16	1.81068	0.454236	P08240;Q6IAX9;A0A024R3M0	P08240;Q6IAX9;A0A024R3M0	Signal recognition particle receptor subunit alpha	SRPR
25.1507	25.6116	25.6779	25.0733	25.5625	24.4438	2012900	1485800	2062000	466850	265670	97197	6	0.55213	0.453588	Q9H6W3;A0A0A8K8C0	Q9H6W3;A0A0A8K8C0	Bifunctional lysine-specific demethylase and histidyl-hydroxylase NO66	NO66
24.2097	24.8702	24.9281	24.5539	24.462	23.6336	1576900	1184700	1754300	478310	294000	121820	2	0.536255	0.452881	B4DIJ9;Q59FJ7;B4E0G1;A0A024R8X3;P48730;H7BYT1;J3KRM8	B4DIJ9;Q59FJ7;B4E0G1;A0A024R8X3;P48730;H7BYT1	Casein kinase I isoform delta	CSNK1D
27.3844	27.9283	27.8526	27.4389	27.2283	27.1455	10756000	12698000	12786000	3267800	1359200	1412200	14	1.10895	0.45091	B4DKE6;P40938;A0A024RDQ8;Q5U0C2;Q53HK8;A0A087X270	B4DKE6;P40938;A0A024RDQ8;Q5U0C2;Q53HK8	Replication factor C subunit 3	RFC3
30.4173	30.9513	30.8453	30.389	30.3212	30.1522	55191000	48955000	59130000	16007000	9877000	9847300	27	1.19136	0.450513	B5MCF9;O00541;B2RDF2;B3KXD6;B3KTZ6;H7C267;Q6ZUE0;H7BYY8	B5MCF9;O00541;B2RDF2;B3KXD6;B3KTZ6	Pescadillo homolog	PES1
30.6113	30.8981	30.7602	30.3255	30.497	30.1032	68990000	62801000	64439000	16716000	15697000	11816000	23	1.47445	0.447957	B0UZZ8;A0A1U9X8U7;A0A1U9X8U3;O15213;B4DP15;A0A1U9X8W1;B4DNI0;A8K806;A8K9A1;A0A140T9L0;A0A0G2JJL1;H0Y6G3	B0UZZ8;A0A1U9X8U7;A0A1U9X8U3;O15213;B4DP15;A0A1U9X8W1;B4DNI0;A8K806;A8K9A1	WD repeat-containing protein 46	WDR46
23.9387	23.868	23.8997	23.4362	23.8392	23.0933	423080	103990	119880	0	0	0	4	0.964261	0.445876	Q86XI2;B3KRQ2;Q9NXD3;H0Y6U5;B4DHE5;B4DXB7	Q86XI2;B3KRQ2;Q9NXD3;H0Y6U5;B4DHE5;B4DXB7	Condensin-2 complex subunit G2	NCAPG2
30.5966	30.7819	30.7046	30.3392	30.39	30.0192	67452000	48886000	62939000	21041000	16148000	12323000	24	1.59561	0.444961	Q9NV06;A0A087WT20;B3KME9;E5RHM4;A0A087X1F8	Q9NV06;A0A087WT20;B3KME9	DDB1- and CUL4-associated factor 13	DCAF13
27.1154	27.4243	27.3384	26.9006	26.7943	26.8505	21385000	18937000	16590000	6344000	4158800	5487200	3	1.99169	0.444255	Q8N726;R9S3C3;Q5ZEY9;K4HYZ8;K4HSH7	Q8N726;R9S3C3	Cyclin-dependent kinase inhibitor 2A, isoform 4	CDKN2A
25.6064	25.0773	24.8218	25.1182	23.8311	25.2249	884460	433270	467020	105520	22914	98150	8	0.368246	0.443766	P53621	P53621	Coatomer subunit alpha;Xenin;Proxenin	COPA
27.8741	28.2549	28.1543	27.8896	27.6575	27.4063	2335200	2417600	2255700	655540	430890	364190	21	1.15718	0.443291	O60287;REV__Q6IFA1	O60287	Nucleolar pre-ribosomal-associated protein 1	URB1
29.228	29.4862	29.4562	29.0103	28.991	28.8446	16863000	13676000	14839000	4228200	3095500	2772900	28	1.98457	0.441501	G3V529;Q9GZR7;F5GYL3;B4DKV2;B4E300;B4DM03;A0A087WXU8;Q7Z4X3;A0A1W2PRR2;B4DGI6;Q59FS7;Q7Z4W0;Q9P054	G3V529;Q9GZR7;F5GYL3;B4DKV2;B4E300;B4DM03;A0A087WXU8;Q7Z4X3;A0A1W2PRR2;B4DGI6;Q59FS7;Q7Z4W0	ATP-dependent RNA helicase DDX24	DDX24
24.8403	25.2719	25.2653	24.5895	24.851	24.6145	876000	1473100	1626100	453240	437450	328090	5	1.25191	0.440838	Q9NRH3;P23258;A0A1B4Z394;K7EIS0;K7EKE5	Q9NRH3;P23258;A0A1B4Z394;K7EIS0;K7EKE5	Tubulin gamma-2 chain;Tubulin gamma-1 chain;Tubulin gamma chain	TUBG2;TUBG1
31.833	32.0102	32.0273	31.5463	31.511	31.4914	50544000	40577000	46511000	13640000	9313000	11284000	54	2.62844	0.440635	P11388;J3KTB7	P11388	DNA topoisomerase 2-alpha	TOP2A
28.2763	28.647	28.6842	28.0435	28.2466	27.9991	3165200	2949800	3183100	630400	539980	522190	31	1.36088	0.439427	Q96L91;A7E2D7;A0A0A0MR80;A0A0A0MR72	Q96L91;A7E2D7	E1A-binding protein p400	EP400
24.7644	25.5214	25.0581	24.6662	24.8046	24.5572	1420300	1471700	1262200	154590	191060	97450	8	0.881854	0.438632	B4DG57;O94880;A0A0U1RRH6	B4DG57;O94880;A0A0U1RRH6	PHD finger protein 14	PHF14
24.1364	23.1524	23.1595	22.4531	23.3116	23.3709	448140	93192	104760	0	36356	0	4	0.423014	0.437561	P12814;A0A024R694;H9KV75;B7Z565;Q86TX4;B4DFY0;H7C5W8;B3KUX9;B7Z2W3;B4DRP5;G3V2N5;G3V380;G3V5M4	P12814;A0A024R694;H9KV75;B7Z565;Q86TX4	Alpha-actinin-1	ACTN1
27.6193	28.1976	28.0025	27.6788	27.6056	27.2235	6903100	6490500	6231200	1713700	1153900	969740	4	0.924977	0.437194	Q96HA1;A0A087WY75;C9JER0;Q6PJE2;C9J370;A0A0J9YWR1;B4DET5;A8MY32;C9JFL1;A6NF01	Q96HA1;A0A087WY75	Nuclear envelope pore membrane protein POM 121	POM121
24.374	24.6193	24.9322	24.6496	23.1801	24.785	289620	326220	365690	131780	24106	118980	6	0.33463	0.436956	Q68CP9;F8W108;F8WCU9;F8VWP4;Q8NBP1;Q96SQ4	Q68CP9;F8W108;F8WCU9	AT-rich interactive domain-containing protein 2	ARID2
23.9144	24.2654	23.9488	23.0159	24.0547	23.7494	579400	755970	639940	150910	182230	0	4	0.59481	0.436161	D6RAF2;Q6PIY7	D6RAF2;Q6PIY7	Poly(A) RNA polymerase GLD2	PAPD4
26.2552	26.474	26.5842	25.9862	25.9952	26.0252	1812500	2369500	1944700	575330	664750	615580	5	1.95614	0.435587	E7EW05;B4DT66;Q9NVU7	E7EW05;B4DT66;Q9NVU7	Protein SDA1 homolog	SDAD1
24.0817	23.8217	24.2455	23.1723	23.8782	23.8227	420690	170250	256750	23627	0	0	5	0.757697	0.425244	O95782;Q8N9K4;B4DXJ6;B7Z1Q4;B7Z5S9;O94973;M0R2D9;B3KMI7;E9PR62;A0A0G2JQM1;A0A0G2JS82	O95782;Q8N9K4	AP-2 complex subunit alpha-1	AP2A1
26.3414	25.0439	25.1012	24.8218	24.8666	25.5228	4760700	852000	1004400	276610	170170	417800	8	0.370647	0.425091	Q59ET3;P40227;B2R9K8;A0A024RDL1;B4DPJ8;A1JUI8;B4DN39	Q59ET3;P40227;B2R9K8;A0A024RDL1;B4DPJ8;A1JUI8;B4DN39	T-complex protein 1 subunit zeta	CCT6A
26.0174	26.207	26.1652	25.4691	25.887	25.7597	2802200	3282100	5040300	894170	922580	784660	7	1.44664	0.424626	P78345;Q5VUC9;Q5VUC3	P78345	Ribonuclease P protein subunit p38	RPP38
30.331	30.6007	30.4789	30.0515	30.2145	29.874	94200000	148770000	119690000	48862000	17653000	13614000	16	1.55381	0.42347	Q5J7U2;O95478;A0A0A0MQZ6;H0YAI9	Q5J7U2;O95478;A0A0A0MQZ6	Ribosome biogenesis protein NSA2 homolog	CDK105;NSA2
26.3335	26.6335	26.6373	26.0286	26.3083	26.0053	6195500	4476500	6345100	1337900	1060100	1001400	9	1.40069	0.420727	C9JZI1;P35249;C9J8M3;C9JTT7;C9JXZ7;C9JGY5;F8WE44;C9JW34;H7C1P0	C9JZI1;P35249;C9J8M3;C9JTT7;C9JXZ7	Replication factor C subunit 4	RFC4
27.9589	28.4546	28.2232	28.03	27.7564	27.5897	3740700	3783400	2880000	1208500	729860	449210	25	1.0259	0.420176	Q5SRE5;Q9BS12;H7C4K7	Q5SRE5	Nucleoporin NUP188 homolog	NUP188
29.0824	29.3844	29.3242	28.82	29.0134	28.6976	14006000	14582000	13554000	3597900	2847300	2362200	26	1.49296	0.419969	Q9H6R0;B4DIS6;I3L1L6;Q05BE5;Q9NPV4;I3L0M5	Q9H6R0;B4DIS6;I3L1L6	Putative ATP-dependent RNA helicase DHX33	DHX33
24.2871	24.3746	24.3422	24.22	23.9196	23.6065	761860	634700	683720	279650	125940	62564	0	1.10164	0.419237	Q5VIY5;A8K8T4;P17035;A8K1C6;Q7L2R6;J3KR51;M0QXU9;Q9HCG1;A0A024R4Q2;M0QXF0;E7ENB8;M0QZA4;M0R099;M0R1T0;A0A024R4L8;M0QYU5;M0R183;Q6NSH2;M0R2R1;M0R0C2;M0R1N4;M0R3A5;M0R2P3;M0QYS4;L0R8M2;A0A0B4J2B2;E7EUL5;F8WAL3;M0R287;M0R0P3;A0A0A0MS71;M0QXU3;M0QYE7;M0R327;E7EU70;Q7Z2U6;Q6NWZ7;Q08EK0;M0R085;Q5HY98;G3XAE0;B3KUR0;C9K0H3;Q6ZNA1;A0A0A0MR57	Q5VIY5;A8K8T4;P17035;A8K1C6;Q7L2R6;J3KR51	Zinc finger protein 468;Zinc finger protein 28;Zinc finger protein 765	ZNF468;ZNF28;ZNF765;ZNF525
27.1856	27.6537	27.4073	27.0297	27.096	26.8646	7114800	6257200	6592600	1919400	1071200	829830	14	1.29393	0.418775	B4DJ73;B4DHL5;Q6NW34;B4E228;B4DUV5;B4DVN9;B4E1X5;E9PFF8;B4DDJ6	B4DJ73;B4DHL5;Q6NW34;B4E228;B4DUV5;B4DVN9;B4E1X5	Uncharacterized protein C3orf17	C3orf17
28.9301	29.3132	29.3735	28.827	28.8409	28.6931	6642500	7556300	10561000	2710400	1946800	1889300	19	1.33562	0.418573	P51532;A7E2E1;Q9HBD4;B9EGQ8;A0A0A0MT49;B3KNW7;B4E0F1;B4DSI8;Q59FZ6;A5D6X0;K7EP28;A0A0U1RRF5;A0A0U1RRD6;A0A0U1RRF8;A0A0A0MSS5;F6UH26;A0A0U1RR09;B1ALG1;F6T8Q0;B1ALG2;Q8N9Q1	P51532;A7E2E1;Q9HBD4;B9EGQ8;A0A0A0MT49;B3KNW7;B4E0F1;B4DSI8;Q59FZ6	Transcription activator BRG1	SMARCA4
24.2061	23.3846	23.6921	22.7465	24.2007	23.0849	955680	442950	567200	187590	214930	141070	2	0.345172	0.41689	O00148;B4DX78;Q69YT6;K7EPJ3;K7EQN7;A0A024R7H0;K7EN69;F6QYI9;A0A0G2JJL7;K7ENP6;A0A0D9SEM9;K7EL56;K7EIL8;F6SXL5;B4DH55;B4DF34;A0A140T9K2;A0A140T9N3;A0A140T9L4	O00148;B4DX78;Q69YT6;K7EPJ3;K7EQN7;A0A024R7H0	ATP-dependent RNA helicase DDX39A	DDX39A;DKFZp547B159
30.3937	30.6193	30.4945	30.1076	30.212	29.9393	164890000	136020000	137820000	50973000	39017000	29257000	11	1.8097	0.416176	M0R117;B4DM74;Q02543;M0R3D6;M0R1A7;B2R4C0;M0R0P7;B4DM94;B4DUV3;Q53HD3;Q32XH3;Q76N54	M0R117;B4DM74;Q02543;M0R3D6;M0R1A7;B2R4C0;M0R0P7;B4DM94;B4DUV3;Q53HD3;Q32XH3	60S ribosomal protein L18a	RPL18A
25.342	25.801	25.6918	25.4469	25.027	25.1151	1432500	1323300	1395100	397310	117530	191760	6	1.03487	0.415218	P50416;B2RAQ8;A0A024R5F4;H3BMD2	P50416;B2RAQ8;A0A024R5F4	Carnitine O-palmitoyltransferase 1, liver isoform	CPT1A
24.0354	24.4167	24.0066	23.7733	24.4254	23.0256	123290	233160	152500	52614	21497	18604	5	0.410867	0.411457	F2Z2E2;Q86VI3;A2RRC9	F2Z2E2;Q86VI3;A2RRC9	Ras GTPase-activating-like protein IQGAP3	IQGAP3
25.0341	25.3768	25.4861	25.6343	25.3591	23.6731	535050	631900	944870	310560	167470	129720	4	0.260181	0.410134	Q9C0J8;B9A053	Q9C0J8;B9A053	pre-mRNA 3 end processing protein WDR33	WDR33
30.7321	30.8713	30.7362	30.4023	30.4628	30.2482	111220000	87298000	96476000	27323000	22266000	24653000	22	2.18683	0.408756	Q6NXR8;P61247;D6RAT0;A8K4W0;D6RG13;D6RB09;H0Y9Y4;B7Z3M5;E9PFI5;D6R9B6;H0Y8L7;D6RAS7;D6RED7;D6RGE0;D6RI02	Q6NXR8;P61247;D6RAT0;A8K4W0;D6RG13;D6RB09;H0Y9Y4;B7Z3M5;E9PFI5;D6R9B6;H0Y8L7	40S ribosomal protein S3a	RPS3A
29.7858	29.6994	29.9993	29.6689	29.4075	29.184	269340000	97926000	240450000	87359000	51003000	32093000	5	1.15557	0.408009	P62314;Q7Z5A3;J3QLI9;J3QLR7	P62314;Q7Z5A3;J3QLI9	Small nuclear ribonucleoprotein Sm D1	SNRPD1
24.3478	25.201	25.0592	24.2998	24.4423	24.6445	547000	615450	548160	157170	90774	89875	5	0.652341	0.40715	Q13472;J3KRR9;J3KS96;J3QS25;J3QR18;A8K398;B4DSJ0	Q13472	DNA topoisomerase 3-alpha	TOP3A
26.6202	26.9445	26.8157	26.5049	26.2544	26.4018	6257300	5613000	4913200	1383600	690540	1044900	12	1.56986	0.406408	Q8N3Z6;B4E024;Q05DN1;X6R4A7	Q8N3Z6;B4E024	Zinc finger CCHC domain-containing protein 7	ZCCHC7
32.0374	26.3983	26.1529	27.3677	27.654	28.3643	643260000	7858900	7318300	7784700	7100200	12600000	0	0.0722448	0.400863	P35321	P35321	Cornifin-A	SPRR1A
29.9394	30.2755	30.1374	29.7887	29.7762	29.5866	40527000	35732000	34842000	10758000	9435600	7439200	23	1.56781	0.400256	Q8TED0;H0Y8P4;D6RF65;REV__Q8TED0;REV__H0Y8P4	Q8TED0;H0Y8P4	U3 small nucleolar RNA-associated protein 15 homolog	UTP15
29.4302	29.893	29.8515	29.4222	29.3106	29.2478	28571000	22532000	29184000	9458700	5743500	5879300	22	1.19618	0.398004	Q9NY93;Q53HB9;G3V0G3;H7C3E9;F8WDT8;F8WEI3;H7BZN7	Q9NY93;Q53HB9;G3V0G3;H7C3E9;F8WDT8	Probable ATP-dependent RNA helicase DDX56	DDX56
29.0331	29.2844	29.3679	28.908	28.8654	28.7198	22440000	12291000	17177000	5136400	3416100	2642100	18	1.57884	0.397402	Q8WTT2;A8K905;B4DXL4	Q8WTT2;A8K905;B4DXL4	Nucleolar complex protein 3 homolog	NOC3L
31.1703	31.4719	31.3258	31.028	30.8803	30.8739	444600000	413950000	416470000	139540000	69887000	94460000	12	1.76655	0.395239	P61353;A0A024R1V4;E4W6B6;B2R4D8;K7ELC7;K7EQQ9;Q6LCU2;K7ERY7	P61353;A0A024R1V4;E4W6B6;B2R4D8;K7ELC7;K7EQQ9	60S ribosomal protein L27	RPL27
29.5047	29.8916	29.9134	29.498	29.4402	29.1862	9790800	8978100	10538000	2575200	1875100	1425100	36	1.13519	0.395081	F5GWX5;Q14839;A0A0C4DGG9;B3KY63;Q8TDI0;K7EMY3;Q659F1;Q659D0;B3KRD4;Q6ZU36;Q6ZSZ4;F2Z2R5;F6T542;K7EPV1;K7ESA5;F5H6N4;Q05CG6	F5GWX5;Q14839;A0A0C4DGG9;B3KY63	Chromodomain-helicase-DNA-binding protein 4	CHD4
28.8491	28.6215	28.3939	28.4051	28.2123	28.0625	10630000	10265000	7867200	2659700	1555000	1765300	22	1.128	0.394855	P28288;B4DL07;B4DZ22	P28288;B4DL07;B4DZ22	ATP-binding cassette sub-family D member 3	ABCD3
29.2509	29.5383	29.3915	29.1148	29.0375	28.8507	58054000	47920000	49136000	19601000	13116000	12994000	10	1.57994	0.392591	P62249;M0R3H0;M0R210;M0R1M5;A0A087WZ27;Q6IPX4;M0QX76;B4DP32	P62249;M0R3H0;M0R210;M0R1M5;A0A087WZ27;Q6IPX4;M0QX76	40S ribosomal protein S16	RPS16
24.5021	23.5133	23.7567	22.676	23.5562	24.3693	869740	369850	303890	0	0	0	5	0.273448	0.390215	P35998;A0A140VK70;A0A1W2PQS1;Q75L23;C9JLS9;B7Z571	P35998;A0A140VK70;A0A1W2PQS1;Q75L23	26S protease regulatory subunit 7	PSMC2
28.1305	28.7219	28.4592	28.1463	28.1034	27.8917	21694000	19383000	19835000	6769400	4067600	3663400	10	0.970272	0.390043	Q9Y3B9;A8K201;A0JLN3	Q9Y3B9;A8K201	RRP15-like protein	RRP15
23.5614	23.9447	24.0401	22.7307	23.8085	23.841	306310	253940	316690	97840	71585	121390	4	0.42167	0.38866	Q9NVM9;H0YH12;F5H5W1;F5H457;Q9NW22	Q9NVM9;H0YH12	Protein asunder homolog	ASUN
24.319	24.1894	24.1503	23.1623	23.877	24.4581	868040	779440	452260	0	134030	137700	5	0.439016	0.387099	Q96CS3;B4E2M8	Q96CS3	FAS-associated factor 2	FAF2
28.2119	28.6079	28.4561	28.1083	28.0976	27.9095	10614000	11049000	11826000	4833600	4626700	3112900	14	1.36699	0.386834	Q9GZR2;B4E331;B4DJ95;A0A0C4DG22;A0A0C4DG31	Q9GZR2;B4E331;B4DJ95	RNA exonuclease 4	REXO4
28.5209	28.8552	28.8052	28.4883	28.219	28.3175	10858000	8765200	10062000	3220000	1522900	2454400	20	1.37901	0.38549	Q86VR6;E9PIF2;Q13206;B4DKX3;Q59EC7	Q86VR6;E9PIF2;Q13206;B4DKX3;Q59EC7	Probable ATP-dependent RNA helicase DDX10	DDX10
29.8383	30.0166	29.931	29.8582	29.4571	29.3166	17128000	13609000	13127000	5741300	2640700	2739700	33	1.06197	0.3847	Q9H2P0;B2RBM8;Q6DHZ8;E9PQK8	Q9H2P0;B2RBM8;Q6DHZ8	Activity-dependent neuroprotector homeobox protein	ADNP
25.6363	26.0182	25.9601	25.4336	25.5527	25.4756	1390900	1323100	1660900	448540	190450	126660	10	1.44214	0.384214	P54198;A8K194;B4DSW6;B7Z830	P54198;A8K194;B4DSW6	Protein HIRA	HIRA
28.5419	28.8105	28.7455	28.2208	28.3627	28.3631	10557000	9003400	10465000	2408000	2086000	2090600	19	1.82543	0.383764	E9PHI4;A0A146IHP0;A4D2Q0;O94901;A7MCZ7;H0Y742;H0Y6N5;B4E278;H7C2K3;C9JK55;H7C3X3;H7C019;C9K051;C9JS54;C9JJU6;Q5S4N2;C9JR15	E9PHI4;A0A146IHP0;A4D2Q0;O94901;A7MCZ7;H0Y742;H0Y6N5	SUN domain-containing protein 1	SUN1;UNC84A
23.9924	24.0929	24.1471	23.6709	23.4532	23.9599	1529900	1123800	1338100	174020	237770	0	2	1.17195	0.382817	Q9NSI2	Q9NSI2	Protein FAM207A	FAM207A
30.1647	30.4432	30.5405	30.1229	30.1135	29.7642	210250000	191920000	187550000	73682000	46322000	39170000	8	1.10296	0.382629	P62266;A8K517;D6RD47;D6RDJ2;D6RIX0;D6R9I7	P62266;A8K517;D6RD47	40S ribosomal protein S23	RPS23
25.349	24.8004	24.3858	24.3739	24.317	24.6975	875220	360430	368020	66950	46138	95441	6	0.559551	0.382314	X5D2F4;Q7L576;B3KWV6;H7C229;B7Z3H2;B7Z4I3;E7EVJ5;E7EW33;B7Z217;B7Z8N7;Q96F07;B3KWT5;A0A0G2JR96;A0A0G2JQT1;Q9NSN1;H0YL50;A0A0G2JRX2;A0A087WU52;A0A0G2JRV9;A0A087WWL1;A0A087WVE1;A0A087WTQ3;A0A087WWZ1	X5D2F4;Q7L576;B3KWV6;H7C229;B7Z3H2;B7Z4I3;E7EVJ5;E7EW33;B7Z217;B7Z8N7;Q96F07;B3KWT5;A0A0G2JR96;A0A0G2JQT1;Q9NSN1	Cytoplasmic FMR1-interacting protein 1;Cytoplasmic FMR1-interacting protein 2	CYFIP1;CYFIP2;DKFZp761H087
31.18	31.5447	31.5378	31.1138	31.133	30.8698	54384000	60146000	52417000	17697000	12909000	12495000	46	1.21885	0.381955	Q8TDD1;F8VRX4;H0YHH7;H0YHZ9	Q8TDD1	ATP-dependent RNA helicase DDX54	DDX54
27.8827	27.9469	28.1686	27.7608	27.4525	27.6436	3976900	2759300	4100600	1044800	595440	755100	24	1.41936	0.380423	O60306;A0A024R9L1;B0AZM4;A8K6F0;H0YH15;H0YLN9	O60306;A0A024R9L1;B0AZM4;A8K6F0	Intron-binding protein aquarius	AQR
31.8538	31.8584	32.0554	31.6554	31.4184	31.5531	222040000	167340000	228980000	77983000	39227000	67984000	22	1.78504	0.380252	Q96IR1;Q53HV1;P62701;B2R491;Q8TD47;C9JEH7;A4FU11;Q496E4;P22090;B7Z1M6;Q53HI6	Q96IR1;Q53HV1;P62701;B2R491	40S ribosomal protein S4, X isoform	RPS4X
27.9785	28.2174	28.3451	27.7812	27.948	27.6715	6705900	5071500	6321600	2007700	1561400	1163900	11	1.32592	0.380105	E7ESY4;Q13330;A0A024R6P5;Q59FW1;H0Y4T7;Q86TR6;Q9BRL8;F8W9Y9;H7C3F3;H0YIT0	E7ESY4;Q13330;A0A024R6P5;Q59FW1;H0Y4T7;Q86TR6	Metastasis-associated protein MTA1	MTA1
29.4007	29.6931	29.6665	29.294	29.2185	29.11	13233000	15968000	16349000	4567200	3222800	2873700	31	1.61461	0.379301	Q03701;B2R5U7;C9J9W7	Q03701;B2R5U7	CCAAT/enhancer-binding protein zeta	CEBPZ
27.1001	27.3231	27.362	26.6966	26.9994	26.9535	4835500	2550300	3370700	1064900	464370	680540	11	1.4145	0.378592	Q5C9Z4	Q5C9Z4	Nucleolar MIF4G domain-containing protein 1	NOM1
31.1259	31.4047	31.2571	30.9604	31.0616	30.6318	234230000	193360000	218400000	64781000	52894000	44250000	20	1.16395	0.377989	B3KTM6;P46777;A2RUM7;Q59GX9;Q5T7N0;Q9BUV4;Q8WYP1	B3KTM6;P46777;A2RUM7;Q59GX9	60S ribosomal protein L5	RPL5
31.6419	31.9127	31.9598	31.4946	31.5132	31.3775	51252000	28440000	34034000	10700000	6939000	7017200	72	1.60101	0.376415	Q14690;B4DH82;B4DES7;S4R3Q4	Q14690;B4DH82	Protein RRP5 homolog	PDCD11
26.397	26.6626	26.706	26.1132	26.2326	26.292	3944700	2201400	3151300	732920	427560	467170	12	1.57189	0.375931	Q2NL82;I3L1Q5;I3L4E8	Q2NL82	Pre-rRNA-processing protein TSR1 homolog	TSR1
28.0632	28.4352	28.4753	28.0568	27.9402	27.8492	6588800	6568500	7603300	1950900	971880	1190400	9	1.22338	0.375804	Q9Y4C8	Q9Y4C8	Probable RNA-binding protein 19	RBM19
30.8902	31.2393	31.083	30.7305	30.9265	30.4312	273780000	293320000	313340000	110900000	92747000	72606000	8	0.999476	0.374756	P49207;A0A024RDH8;Q5MK14	P49207;A0A024RDH8	60S ribosomal protein L34	RPL34
30.1523	30.2569	30.324	29.9041	29.9832	29.7307	14997000	9746600	10666000	3771000	2491000	2149100	37	1.84295	0.371729	Q92621;B4DE72;Q6P486;Q6DKH1;Q4VBX7;U3KPX2;U3KQ47;U3KQ97;B4DM61	Q92621	Nuclear pore complex protein Nup205	NUP205
25.7941	26.1788	26.1387	25.786	25.6607	25.5548	900930	1152100	1008100	251860	103490	94327	12	1.24805	0.370049	Q9Y4B6;B3KN11	Q9Y4B6	Protein VPRBP	VPRBP
32.2879	32.6137	32.5536	32.2398	32.122	31.9835	291790000	346850000	265680000	86421000	61009000	53000000	26	1.38589	0.369926	O75367;Q59FH0;B4DJC3;D6RCF2;Q9HA11;Q9P0M6;A0A024QZP6;Q5SQT3	O75367;Q59FH0;B4DJC3	Core histone macro-H2A.1;Histone H2A	H2AFY
25.4646	25.8592	25.9503	25.5768	25.5839	25.0064	350830	273040	351900	87579	50218	32027	10	0.692956	0.369012	Q96T58;F6WRY4;H0Y5U7	Q96T58	Msx2-interacting protein	SPEN
30.8139	31.0739	30.891	30.623	30.5761	30.4728	134100000	116970000	119320000	41081000	28937000	30267000	16	1.84493	0.368936	Q9H7B2;Q5VXN0;A8K800;B4DWS5	Q9H7B2;Q5VXN0;A8K800;B4DWS5	Ribosome production factor 2 homolog	RPF2
26.6547	27.1481	27.3449	26.7231	26.5123	26.8147	1502900	1878300	1869800	491650	223430	339330	14	0.7504	0.365847	P51610;A6NEM2;Q05C05;H7C1C4	P51610;A6NEM2;Q05C05	Host cell factor 1;HCF N-terminal chain 1;HCF N-terminal chain 2;HCF N-terminal chain 3;HCF N-terminal chain 4;HCF N-terminal chain 5;HCF N-terminal chain 6;HCF C-terminal chain 1;HCF C-terminal chain 2;HCF C-terminal chain 3;HCF C-terminal chain 4;HCF C-terminal chain 5;HCF C-terminal chain 6	HCFC1
29.8597	30.2057	30.2605	29.6067	29.9665	29.6553	49151000	48573000	55126000	13962000	12157000	11817000	19	1.01796	0.365773	Q9H0S4;A0A024RAS3;Q9H4E3;Q53GJ1;F5H1N9;A4UCU0;Q7Z4B1;B4DYP6	Q9H0S4;A0A024RAS3;Q9H4E3;Q53GJ1	Probable ATP-dependent RNA helicase DDX47	DDX47;E4-DBP
28.82	28.9796	29.0791	28.634	28.6613	28.4866	19192000	14358000	16863000	4334000	3714300	2663700	22	1.76787	0.365554	Q9BW27;J3KT10;J3QL54;F5H0W7;B3KW81;B4DYG7;J3QLH0;J3KRC0;B7Z3C2;J3KSH3;J3QLD4;J3QL91;J3QLV0;J3KS87;J3QS63	Q9BW27;J3KT10;J3QL54;F5H0W7;B3KW81;B4DYG7	Nuclear pore complex protein Nup85	NUP85
29.5215	29.31	29.511	28.8274	29.2461	29.1742	10064000	6308500	7520700	2041000	1565700	2138500	35	1.17171	0.36494	P46940;A0A024RC65;A4QPB0;H0YLE8;B4E2M0;A0A0J9YXZ5;Q6P1N4;B4DNP4;Q96PA3;Q5FWG8;Q05DN7;A0A087WWP1;A0A087X225	P46940;A0A024RC65;A4QPB0;H0YLE8;B4E2M0;A0A0J9YXZ5;Q6P1N4	Ras GTPase-activating-like protein IQGAP1	IQGAP1
24.0319	24.212	24.6241	24.6808	24.2564	22.8401	1643400	2205000	4531600	2592300	1369600	1103300	3	0.246461	0.363586	C9JYM0;O75817	C9JYM0;O75817	Ribonuclease P protein subunit p20	POP7
29.6593	29.9889	29.9347	29.5009	29.625	29.3668	34951000	27041000	32220000	10840000	5713300	5783100	22	1.34457	0.36338	Q9Y3T9;B3KNC3;Q9H9J5;Q8NAK7;B4DY21;B4DM71	Q9Y3T9;B3KNC3;Q9H9J5;Q8NAK7	Nucleolar complex protein 2 homolog	NOC2L
25.8925	26.2816	26.2972	26.0732	26.0193	25.291	2839900	2833600	2870100	855670	479590	417500	8	0.565365	0.362549	Q1ED39;H3BNU8;H3BMC9;H3BPL4	Q1ED39	Lysine-rich nucleolar protein 1	KNOP1
30.6311	31.0753	30.8722	30.5759	30.8002	30.115	82743000	76860000	76853000	26698000	23385000	15368000	9	0.690243	0.362527	Q9NQ55;A0A0A6YYI3;A0A0B4J1V8;A8MV53;C9J3W3;C9JHF7	Q9NQ55;A0A0A6YYI3;A0A0B4J1V8;A8MV53	Suppressor of SWI4 1 homolog	PPAN
31.5123	32.0087	31.961	31.43	31.4524	31.5154	48003000	44178000	53176000	15836000	9894900	10875000	45	1.06016	0.361384	Q9BQG0;I3L1L3;B4DE42;B4DZZ1;B4DWP5;I3L2H8;I3L311	Q9BQG0;I3L1L3	Myb-binding protein 1A	MYBBP1A
27.8452	27.8095	27.8165	27.5447	27.5792	27.2666	14632000	3241900	5666500	1437000	1084900	768410	9	1.64996	0.360214	Q9UJS0;Q53GR7;B7Z2E2;R4GN64;Q75KX8;Q75M55	Q9UJS0;Q53GR7;B7Z2E2	Calcium-binding mitochondrial carrier protein Aralar2	SLC25A13
30.4891	30.7844	30.8212	30.4002	30.3826	30.232	45118000	34869000	39472000	13667000	10279000	8772100	26	1.42163	0.359987	Q92841;A0A1W2PQ51;Q59F66;B4DZQ7;A0A0U1RQJ0;Q9UQL5	Q92841;A0A1W2PQ51;Q59F66;B4DZQ7	Probable ATP-dependent RNA helicase DDX17	DDX17
24.769	24.7182	24.4977	24.74	24.9098	23.2582	409130	338420	338100	163700	103900	66784	4	0.270688	0.358949	H7BZ93;C9JG86;H7BXT4;H7C3H4;Q9BYW2	H7BZ93;C9JG86;H7BXT4;H7C3H4;Q9BYW2	Histone-lysine N-methyltransferase SETD2	SETD2
25.1379	25.406	25.1913	25.3265	25.037	24.2954	1776000	1372600	1337100	432890	192350	155110	6	0.492156	0.358784	Q8NDX5;E7EX82;A5YM43;B4E2T1;B4DYD1;H7C528;C9J6H0;C9JAU4;H7C4H9;C9JYH7	Q8NDX5;E7EX82;A5YM43;B4E2T1;B4DYD1	Polyhomeotic-like protein 3	PHC3
29.141	29.48	29.2805	29.0424	28.9872	28.7973	20464000	13153000	15215000	6562100	3272200	2707400	23	1.35842	0.358212	B4DED6;Q9BQ39;B4DW97;A0A087WVC1;K0J110;Q53FI9;Q9NTA9	B4DED6;Q9BQ39;B4DW97;A0A087WVC1;K0J110;Q53FI9	ATP-dependent RNA helicase DDX50	DDX50;mcdrh
29.0821	29.2723	28.9873	28.8237	28.9633	28.4841	80420000	57827000	71659000	18718000	19837000	13084000	9	1.01421	0.356885	P62244;B2R4W8;I3L3P7;A8K7H3;I3L246;H3BN98;H3BV27;H3BT37;I3L303;H3BVC7	P62244;B2R4W8;I3L3P7;A8K7H3;I3L246	40S ribosomal protein S15a	RPS15A;hCG_1994130
30.5961	30.564	30.6093	30.1652	30.2058	30.329	20349000	14346000	14801000	4777000	3057400	3355100	55	2.65476	0.356455	Q00610;A0A087WVQ6;J3KS13;A0A087WX41;P53675;J3KSQ2;J3QL20;A4FU99;K7EJJ5;J3KRF5;F5H5N6	Q00610;A0A087WVQ6	Clathrin heavy chain 1	CLTC
30.9722	31.2404	31.1337	30.8296	30.8589	30.5896	266410000	218530000	258550000	75027000	61770000	59261000	13	1.43321	0.356062	P46779;H0YKD8;H0YMF4;Q59F34;H0YLP6;O60251	P46779;H0YKD8;H0YMF4;Q59F34;H0YLP6	60S ribosomal protein L28	RPL28
30.1069	30.7046	30.6563	30.1925	30.1971	30.0106	86365000	90011000	96878000	26751000	19747000	16849000	20	0.818684	0.355875	Q13242;A8K3M9;H0YIB4;S4R3G0;B4DFT9	Q13242;A8K3M9;H0YIB4;S4R3G0;B4DFT9	Serine/arginine-rich splicing factor 9	SRSF9
26.2964	26.4782	26.5217	26.0907	26.2075	25.9307	2123100	3128700	2808700	1243900	880680	677840	10	1.54906	0.355799	B4DQG8;Q9NPF5;Q5TG40;Q5TG38;Q5TG39;B4DTH3;B4DEF2;B4DTU6;Q5TG37;Q5TG36;B4DU03	B4DQG8;Q9NPF5;Q5TG40;Q5TG38;Q5TG39	DNA methyltransferase 1-associated protein 1	DMAP1
29.6881	29.3716	29.5178	29.2446	29.4002	28.8663	155890000	95431000	136280000	41012000	29591000	27798000	6	0.906515	0.355488	E7ETK0;A0A087WUS0;P62847	E7ETK0;A0A087WUS0;P62847	40S ribosomal protein S24	RPS24
28.8812	29.184	29.036	28.8813	28.5984	28.5556	127020000	109290000	108410000	44541000	25165000	27048000	7	1.24085	0.355352	Q969Q0;B2R4V2;P83881;H0Y5B4;H7BZ11;J3KQN4;R4GN19	Q969Q0;B2R4V2;P83881;H0Y5B4;H7BZ11;J3KQN4;R4GN19	60S ribosomal protein L36a-like;60S ribosomal protein L36a	RPL36AL;RPL36A
28.2356	28.5599	28.8278	28.0668	28.2791	28.2167	29174000	15743000	29718000	8624600	5235100	5881800	9	0.904228	0.35357	Q9BXY0;A0PJ56;H0YBV6	Q9BXY0	Protein MAK16 homolog	MAK16
24.2027	24.2874	24.6889	24.4187	23.8992	23.8051	5065500	3627900	4910500	2068200	1412500	581150	2	0.656586	0.351999	Q9P1U0;Q2L6J2;A0A1U9X8Y8	Q9P1U0;Q2L6J2;A0A1U9X8Y8	DNA-directed RNA polymerase I subunit RPA12;DNA-directed RNA polymerase subunit	ZNRD1
30.1203	30.5309	30.3794	30.0645	30.0235	29.8901	174890000	171010000	173050000	57265000	47246000	42909000	11	1.25756	0.350844	P18077;C9K025;F8WBS5;F8WB72	P18077;C9K025;F8WBS5;F8WB72	60S ribosomal protein L35a	RPL35A
27.9879	28.2536	28.2204	27.8728	27.7248	27.8199	3615900	3566700	3650300	1097800	519290	607610	25	1.68028	0.348124	O60318;B7Z8Z8;B3KWZ4;B3KXE8;B3KT88	O60318;B7Z8Z8	80 kDa MCM3-associated protein	MCM3AP
32.5791	32.9279	32.7794	32.4862	32.4047	32.3516	295150000	269280000	273940000	101700000	70305000	59322000	38	1.48688	0.347949	O76021;Q32Q62;J3QSV6;A0PJ61;A0PJ87;I3L3U9;I3L3C4;I3L234;I3L1A3;J3KPU7;I3L2F2;I3L4T8;I3L1Y4	O76021;Q32Q62;J3QSV6;A0PJ61;A0PJ87;I3L3U9	Ribosomal L1 domain-containing protein 1	RSL1D1
30.3354	30.7493	30.8668	30.1818	30.3577	30.3795	21768000	19705000	25618000	5834500	5239000	6281500	34	0.930584	0.344185	Q5JTH9;B3KMR5;B3KY97;A0A087X1U8;H7C1M8;B3KPQ2;A0A087WYW2;A0A087X0G0	Q5JTH9;B3KMR5;B3KY97	RRP12-like protein	RRP12
24.3541	24.6574	24.7242	24.6068	24.5801	23.5221	492140	330200	240690	153140	145580	79299	5	0.384119	0.342248	Q96HW7;A8K4A1;E9PIM3;F8WAA7	Q96HW7;A8K4A1	Integrator complex subunit 4	INTS4
24.1718	24.6087	23.9534	23.9316	23.8604	23.9194	354000	779440	473280	203460	133740	161520	3	0.813584	0.340844	P06241;B3KPS6;E5RFS5;E5RH71;E5RIX5	P06241;B3KPS6	Tyrosine-protein kinase Fyn	FYN
31.005	31.3487	31.2501	30.9008	30.9019	30.7787	56978000	53029000	52809000	18249000	12473000	11813000	48	1.43952	0.340769	Q6NUN2;O15226;A3F769;A3F768;A2I829;A2I828;A1Z1A7;A2I830;A2I827;A2I831;A2I832	Q6NUN2;O15226;A3F769;A3F768;A2I829	NF-kappa-B-repressing factor	NKRF;NRF
26.9673	27.5441	27.4191	27.2293	26.734	26.9481	6020200	7190600	8015100	2643200	1217100	1285100	10	0.682075	0.339657	O75319;H7C0E6;C9JYA6	O75319	RNA/RNP complex-1-interacting phosphatase	DUSP11
28.422	28.7486	28.5622	28.3175	28.3268	28.0928	8159600	8178300	9693800	2529600	1642900	1668300	27	1.27955	0.331906	Q69YP1;Q5JY65;Q9BZJ0;Q8IXG0	Q69YP1;Q5JY65;Q9BZJ0;Q8IXG0	Crooked neck-like protein 1	DKFZp762M013;CRNKL1;crn
31.8717	31.9763	31.9043	31.6949	31.6785	31.3839	415180000	297000000	320390000	113960000	93061000	76170000	17	1.45748	0.331684	P62280;M0QZC5;M0R1H6;M0R1H5	P62280;M0QZC5	40S ribosomal protein S11	RPS11
23.9772	24.183	24.2037	23.3492	23.7489	24.271	305580	286990	336450	94582	73762	138950	2	0.527814	0.331587	B4DLA6;P33991;B3KMX0;A0A024R7U6;E5RG31	B4DLA6;P33991;B3KMX0;A0A024R7U6;E5RG31	DNA replication licensing factor MCM4	MCM4
30.9215	31.328	31.2592	30.9344	30.9173	30.6622	59336000	50839000	55939000	14168000	13572000	12158000	35	1.01451	0.331573	A0A0A0MTB8;Q8NI36	A0A0A0MTB8;Q8NI36	WD repeat-containing protein 36	WDR36
24.091	23.3173	23.7294	23.2586	23.9283	22.9564	1988000	813880	1213700	347890	140520	267150	0	0.383121	0.33146	Q4QZ30;W6MX28;W5RED0;W0NUC1;W0NUA7;W0NT97;W0NQ16;V5N0V4;V5N0B1;V5JAP7;V5JAE2;V5JA94;V5JA91;V5JA78;V5J9V7;U5YTY6;U5YRJ7;U5IT74;U5IS30;U5IRK8;U5IQP2;U5IQI6;U5IQI3;U3RKH4;T1R3D3;T1R378;T1R373;T1R363;S4TZL2;S4TZI1;S4T754;S4T752;S4T751;S4T705;S4T6S7;S4T6Q1;S4T6P5;S4T6K9;S4T6K6;R9R088;R9R081;R9QZG8;R9QZB8;R9QZ22;R4QU23;R4QT61;R4QQW3;R4QQV9;R4QIQ2;R4QGH6;Q9UIP3;Q9TQN2;Q9TPV1;Q9MY28;Q9GJ39;Q9BCN2;Q95ID6;…	Q4QZ30;W6MX28;W5RED0;W0NUC1;W0NUA7;W0NT97;W0NQ16;V5N0V4;V5N0B1;V5JAP7;V5JAE2;V5JA94;V5JA91;V5JA78;V5J9V7;U5YTY6;U5YRJ7;U5IT74;U5IS30;U5IRK8;U5IQP2;U5IQI6;U5IQI3;U3RKH4;T1R3D3;T1R378;T1R373;T1R363;S4TZL2;S4TZI1;S4T754;S4T752;S4T751;S4T705;S4T6S7;S4T6Q1;S4T6P5;S4T6K9;S4T6K6;R9R088;R9R081;R9QZG8;R9QZB8;R9QZ22;R4QU23;R4QT61;R4QQW3;R4QQV9;R4QIQ2;R4QGH6;Q9UIP3;Q9TQN2;Q9TPV1;Q9MY28;Q9GJ39;Q9BCN2;Q95ID6;…	HLA class I histocompatibility antigen, B-59 alpha chain;HLA class I histocompatibility antigen, B-55 alpha chain;HLA class I histocompatibility antigen, B-54 alpha chain;HLA class I histocompatibility antigen, Cw-16 alpha chain;HLA class I histocompatibility antigen, Cw-14 alpha chain;HLA class I histocompatibility antigen, Cw-12 alpha chain;HLA class I histocompatibility antigen, Cw-4 alpha cha…	HLA-C;HLA-B;HLC-C;HLA-Cw;HLA-A;HLA-B*5501 variant;HLA-CW;HLA;HLAC;HLA-B52;HLA-B*35JAC;Cw*03;B*15;B*35;HLA-Cw*07;HLA-B*18 variant;HLA-Cw*0707;HLA-B*4202;HLA-B*1805;HLA -B;HLA-B15;HLA-B*3531;HLA-B*35SRE;HLA-B52v;HLA-B*5603;HLA-B*;HLA-B*1522;HLA-B*5101 variant;HLA-B*15IL;HLA-B*15MD;HLA-B*51IM;HLA-B*58;HLA-B51;B-3501;HLA-Bw62.4;HLA-Bw62.1;HLA-Bw62.5;HLA-Bw62.3;HLA-B57;HLA-B*1513;HLA-B35;HLA-B*3512;MHC
31.5027	31.7866	31.9572	31.4763	31.3608	31.4195	29109000	23264000	31300000	9774000	5991600	6320300	89	1.13534	0.329985	O75643;A4FU77;Q9H8B9;B4E150;Q9UNV9;A2RRQ7;B4E0P5;Q7L5W4;Q9P172;Q5ZF01	O75643;A4FU77	U5 small nuclear ribonucleoprotein 200 kDa helicase	SNRNP200
26.8949	27.1147	27.2295	26.9002	26.8229	26.5305	5045800	4052300	4407900	1561800	1008700	784510	9	1.0328	0.328488	A0A0U1RRM1;Q8WXI9;B3KSZ4;A0A0U1RR30;A0A0U1RR34;A0A1B0GW07	A0A0U1RRM1;Q8WXI9;B3KSZ4;A0A0U1RR30	Transcriptional repressor p66-beta	GATAD2B
28.6142	29.0263	28.7765	28.4951	28.5613	28.3762	18103000	13661000	34342000	5862000	4004600	4152100	15	1.17321	0.328142	Q9H4L4;A0A087X0R7;J3QL36;A0A087WV50;J3QRE4;J3KSF5	Q9H4L4;A0A087X0R7;J3QL36	Sentrin-specific protease 3	SENP3
31.6384	31.9257	31.9298	31.5714	31.5602	31.3834	28775000	24864000	27976000	9210100	6218200	5164400	83	1.33799	0.3263	Q6P2Q9;B4DK16;I3L0J9;Q53GM6;I3L3Z8;Q6JH02;Q6JH03;I3L1T8	Q6P2Q9;B4DK16	Pre-mRNA-processing-splicing factor 8	PRPF8
31.2392	31.266	31.3332	30.9695	30.9878	30.9059	236600000	187670000	224470000	73023000	62475000	53950000	16	3.01661	0.325064	P62917;E9PKZ0;B4DVG7;E9PKU4;G3V1A1;E9PP36	P62917;E9PKZ0;B4DVG7;E9PKU4;G3V1A1	60S ribosomal protein L8	RPL8
27.947	27.9363	27.6408	27.6324	27.5834	27.3371	73654000	38954000	36213000	19557000	14233000	7764900	6	1.12178	0.323727	P08708;H0YN88;A0A075B716;H0YN73;A4D1Q6;H3BNC9	P08708;H0YN88;A0A075B716;H0YN73	40S ribosomal protein S17	RPS17;RPS17L
25.3734	25.9275	25.881	25.7389	25.0781	25.3939	828260	630610	787540	240220	80646	130040	10	0.549657	0.323666	Q92878;E7ESD9;A8K3I2;E7EN38;Q32P42;E9PM98;A5D6Y3;C9JNH8;A0A1W2PPC4;H7C0V2	Q92878;E7ESD9;A8K3I2;E7EN38;Q32P42	DNA repair protein RAD50	RAD50
29.6735	30.0251	30.0246	29.5522	29.6391	29.5648	82963000	71895000	76507000	25502000	19379000	19199000	20	1.25865	0.322374	Q9Y3A2	Q9Y3A2	Probable U3 small nucleolar RNA-associated protein 11	UTP11L
27.2457	24.7615	24.888	26.4301	24.497	25.0012	3782300	425640	585240	695480	165840	541540	14	0.118062	0.32229	Q07065;A0A024RBH2;B3KVX6;Q8TB01;Q6NWZ1	Q07065;A0A024RBH2;B3KVX6;Q8TB01;Q6NWZ1	Cytoskeleton-associated protein 4	CKAP4
29.0148	29.2285	29.3127	28.6858	29.005	28.9031	20537000	19405000	22736000	5575500	6244600	5384800	16	1.16616	0.320695	P56182;Q6PJJ2;Q53FR7;Q96J73;B4DZM3;D6RE82	P56182;Q6PJJ2;Q53FR7;Q96J73;B4DZM3	Ribosomal RNA processing protein 1 homolog A	RRP1
26.1077	26.2452	26.3146	25.9736	25.9015	25.8328	1430600	947310	1316900	413150	320880	204190	8	1.92353	0.319921	A0A024RE13;Q9NRR4;Q59FF9;H7C5U6	A0A024RE13;Q9NRR4;Q59FF9	Ribonuclease 3	DROSHA
24.7514	24.2947	24.7633	24.2585	24.413	24.1818	589460	416480	713210	119340	110410	86334	4	0.880629	0.318723	Q9Y2X0;U3KQB4;B9TWZ6;U3KQ43;B9TWZ8;K7EKS6;B9TX06;B9TX05;A0A0J9YYC6;A0A0J9YXE6;A0A0J9YXA0	Q9Y2X0;U3KQB4;B9TWZ6;U3KQ43;B9TWZ8;K7EKS6	Mediator of RNA polymerase II transcription subunit 16	MED16
29.3895	29.7746	29.8748	29.3556	29.4428	29.2888	25931000	22958000	36187000	8104300	5236900	7281800	17	0.961272	0.31719	Q9Y2R4;Q59H21;B3KM65;A0A087X1P7;A0A087WTD6;A0A087X069;A0A087X121	Q9Y2R4;Q59H21;B3KM65	Probable ATP-dependent RNA helicase DDX52	DDX52
24.6947	24.9008	24.993	24.8283	24.8775	23.9323	1430200	1157200	1445000	348370	270790	134770	6	0.422882	0.316785	G3XAN1;Q9NV88;B7Z3J7;B7Z970;E5RG70;E5RK47;H0YBH8	G3XAN1;Q9NV88;B7Z3J7;B7Z970;E5RG70	Integrator complex subunit 9	INTS9
30.0902	30.313	30.1923	29.8586	29.9242	29.8647	17648000	38614000	18983000	3780400	3515800	3013300	28	2.02015	0.315949	P57740;B3KMK0;G3V1T4;H0YG15	P57740;B3KMK0	Nuclear pore complex protein Nup107	NUP107
26.9647	27.3636	27.3981	27.047	26.9837	26.7618	3085500	2694000	2984700	771290	410950	362530	19	0.885654	0.311302	Q8N1G0;H0Y5I5;F8WCX2;Q9HCE3;B3KXW2;A0A024R283	Q8N1G0;H0Y5I5	Zinc finger protein 687	ZNF687
28.2884	28.4062	28.3484	28.1023	28.0293	27.9789	8005300	6127500	6303200	1813700	1502500	1554200	23	2.48706	0.310853	P16615;A0A0S2Z3L2;H7C5W9;A8K9K1;Q93084;Q8N3X5;Q7Z675;O14983;Q7Z6E5;J3QSY6;A0A0S2Z3H0;A0A0S2Z425;H3BTW4;B3KS35	P16615;A0A0S2Z3L2;H7C5W9	Sarcoplasmic/endoplasmic reticulum calcium ATPase 2	ATP2A2
27.0068	27.4722	27.3475	27.0943	27.1185	26.6849	5267800	5055300	4070300	2731200	1517200	1253300	7	0.715239	0.309607	Q2VIN3;Q96E39;A0A1B0GUK8;Q8N7X1	Q2VIN3;Q96E39;A0A1B0GUK8	RNA binding motif protein, X-linked-like-1	RBMXL1
27.0663	27.3317	26.8061	26.7669	27.0024	26.5107	4406300	2589300	1950500	688080	776230	581690	1	0.672958	0.30804	Q9NXE4;F8WF03;F2Z2I0;F2Z2W5;C9J647;B4DEV6	Q9NXE4	Sphingomyelin phosphodiesterase 4	SMPD4
30.4258	30.8451	30.8351	30.3957	30.4643	30.3265	40703000	38831000	44186000	15639000	9634600	9433800	39	1.00027	0.306516	Q9NW13;A0A024R753;B4DJ90;C9JAA9;H7C5G8;C9JE21;A0A0S2Z5E5	Q9NW13;A0A024R753	RNA-binding protein 28	RBM28
29.9234	30.0953	29.994	29.7183	29.7145	29.6607	29662000	25110000	20224000	7490100	5265200	6069700	2	2.34455	0.306425	Q15269;C9J544;A0A0J9YX21;Q59FM2;A0A096LPI6	Q15269	Periodic tryptophan protein 2 homolog	PWP2
30.452	30.6795	30.5331	30.3605	30.366	30.0205	29121000	22391000	24017000	8561900	5769800	4842100	41	1.08749	0.305877	Q8WUM0;B4E206;B4E3T7;A0A024R3R6	Q8WUM0;B4E206;B4E3T7;A0A024R3R6	Nuclear pore complex protein Nup133	NUP133
25.2782	25.3235	25.9655	25.238	25.278	25.1373	601610	454070	829050	113620	114620	72342	9	0.604382	0.304643	Q7KZ85	Q7KZ85	Transcription elongation factor SPT6	SUPT6H
27.472	27.8238	27.8274	27.3589	27.4265	27.4291	11366000	11870000	12801000	2338600	2548300	2674200	5	1.18551	0.302884	Q13601	Q13601	KRR1 small subunit processome component homolog	KRR1
29.9389	30.142	30.1072	29.8097	29.7778	29.6926	27273000	25087000	26875000	6677600	6757800	4206000	27	1.86893	0.302689	Q8IWA0;A8K330;F8WE20;F8WC81;Q05D27	Q8IWA0;A8K330	WD repeat-containing protein 75	WDR75
26.3315	26.4048	26.1316	25.9697	26.1311	25.8597	3859700	3416000	2745800	947100	1010600	447390	6	1.25138	0.302467	W0HJ78;Q9UH17;B0QYD3;B7ZLZ1;P31941;A0A0K0MJ49;A0A0K0MJ25	W0HJ78;Q9UH17;B0QYD3	DNA dC->dU-editing enzyme APOBEC-3B	APOBEC3B
24.5393	24.2571	24.5773	24.7467	25.0001	22.72	742050	530740	763110	235200	221050	93230	5	0.155229	0.302304	X5D7S8;B4DP93;X5D7K9;X5DNU0;B4DDR2;X5D2M8;Q14764;B4DXN0;H3BP76;H3BUK7;H3BNF6;H3BRL2;H3BQK6;X5DP17;X5D7R7;X5DP24;H3BPZ2;H3BNF2;H3BUP3;H3BQE7	X5D7S8;B4DP93;X5D7K9;X5DNU0;B4DDR2;X5D2M8;Q14764;B4DXN0	Major vault protein	MVP
26.9388	27.1215	27.1334	26.7033	26.9087	26.6783	2949400	1851200	2423800	437600	430350	528870	2	1.45065	0.301105	P49916;K7ERZ5;K7ENR9;Q96DF0	P49916	DNA ligase 3	LIG3
26.7461	27.0904	27.2946	26.9068	26.7486	26.5796	3232700	2876500	3443100	1347200	903940	772930	10	0.73699	0.298724	Q53H60;O60508;Q59H56;Q5SRN1;H0UI46;Q2TA76;B4DHE3	Q53H60;O60508;Q59H56;Q5SRN1;H0UI46	Pre-mRNA-processing factor 17	CDC40
30.6592	30.9815	30.982	30.6233	30.6844	30.4209	53046000	45108000	46372000	21442000	13456000	11617000	27	1.04617	0.297995	Q9NVP1;A0A024RAH8;Q4ZG72;Q8N254;H7C452;Q59FR7;Q53TI6	Q9NVP1;A0A024RAH8;Q4ZG72;Q8N254	ATP-dependent RNA helicase DDX18	DDX18
28.4096	24.3493	25.0206	24.3788	25.2828	27.2262	43212000	1908600	3540600	869000	1325600	3722700	7	0.0686925	0.297203	P07737;K7EJ44;I3L3D5;CON__P02584	P07737;K7EJ44	Profilin-1	PFN1
26.3132	25.0548	25.3616	26.0956	24.4143	25.3328	10059000	2136300	4186200	2504700	849760	1388200	3	0.182796	0.295649	Q2LE71;O15145;B2R4D5;C9JZD1;B4DM63;F8VR50	Q2LE71;O15145;B2R4D5;C9JZD1;B4DM63	Actin-related protein 2/3 complex subunit 3	ARPC3
26.4872	26.124	25.9857	25.7879	25.864	26.0597	19607000	11028000	11323000	4536200	3218500	2761400	5	0.80233	0.295165	P62851	P62851	40S ribosomal protein S25	RPS25
26.7834	27.0159	27.213	26.679	26.7971	26.6588	3517200	2203500	2601800	1044100	986360	918550	9	1.04544	0.292466	Q68CQ4;A8K0P8;B3KVX2;H7C2R4	Q68CQ4;A8K0P8	Digestive organ expansion factor homolog	DIEXF
30.9444	31.3175	31.5629	30.8739	31.0311	31.048	176910000	153160000	171810000	55088000	44511000	49049000	21	0.704787	0.290603	Q07955;J3KTL2;Q59FA2;A8K1L8;J3KSR8;B7Z570;J3QQV5;J3KSW7	Q07955;J3KTL2;Q59FA2;A8K1L8;J3KSR8	Serine/arginine-rich splicing factor 1	SRSF1
30.0968	27.1911	26.1234	26.9275	26.5126	29.1011	49835000	6365800	1470100	1318900	1290200	8331700	26	0.070837	0.290029	P06733;A0A024R4F1;E2DRY6;K7EM90;A4QMW8;A4UCS8;F5H0C8;L0R849;Q6FHV6;P13929;P09104;F5H1C3;E5RI09;Q9NPL4;E5RG95;K7EPM1;K7EKN2;B4DUJ6;E5RGZ4;D3DTL4;A8K3B0	P06733;A0A024R4F1;E2DRY6	Alpha-enolase;Enolase	ENO1
26.5187	26.6067	26.5812	26.4064	26.2369	26.1934	4302200	3436500	3081700	976050	863100	775920	11	1.84219	0.289936	Q5UGI2;A0A0A0MRY2;Q5BJG6;B7Z3W2;B0QZE2;B7Z2J6;J3QKD2;Q15326;E7ENI9;Q6PJR5;B7Z3Z1;E9PE09;E7EV75	Q5UGI2;A0A0A0MRY2;Q5BJG6;B7Z3W2;B0QZE2;B7Z2J6;J3QKD2;Q15326;E7ENI9;Q6PJR5;B7Z3Z1	Zinc finger MYND domain-containing protein 11	ZMYND11
28.1291	28.496	28.5921	27.8056	28.1079	28.4353	45739000	32182000	34835000	5814100	7692100	10362000	9	0.557658	0.289455	P62277;J3KMX5;E9PS50	P62277;J3KMX5	40S ribosomal protein S13	RPS13
29.4925	29.7242	29.7175	29.496	29.4405	29.1321	9321800	8683500	9621000	3767900	2110400	1803400	34	0.991725	0.288508	A8K583;Q14966;D6W5H1;A0A096LPH6;B4DF54;B4E187;A0A096LPI0;C9JWN0;A0A096LPB4;A0A096LNR2;A0A096LNX0;A0A096LNQ0;Q6ZQV0;Q57Z90	A8K583;Q14966;D6W5H1;A0A096LPH6;B4DF54	Zinc finger protein 638	ZNF638
25.6779	26.2067	26.0053	25.5286	25.8825	25.6216	1921600	2687700	2496900	625550	315720	277680	5	0.696479	0.285772	F2YMM1;S4S3R8;Q15910;A0A090N8E9;Q75MP9;Q75MQ0;G3XAL2;Q59H64;B7Z8K5;E9PDH6;Q6R125;B7Z8L6;K7EIH5	F2YMM1;S4S3R8;Q15910;A0A090N8E9;Q75MP9;Q75MQ0	Histone-lysine N-methyltransferase EZH2	EZH2
24.788	25.1146	25.434	24.7664	24.761	24.9553	1038800	970090	1338000	306080	199560	274850	4	0.653124	0.284624	Q08945;A0A024R4Z6;Q59GH7	Q08945;A0A024R4Z6	FACT complex subunit SSRP1	SSRP1
30.2575	30.6573	30.6369	30.3236	30.2771	30.0999	29951000	28702000	32025000	10578000	7789600	6414200	33	0.901921	0.283751	B4DZC3;Q9H0D6;B3KMC9;B4E0B9	B4DZC3;Q9H0D6;B3KMC9;B4E0B9	5-3 exoribonuclease 2	XRN2
28.4882	28.7382	28.7676	28.4006	28.5582	28.185	7670200	7638500	8142700	2597500	1825700	1324600	23	0.948208	0.283385	Q02241;H7BYN4;H0YKQ5;H0YME6;H0YMJ4	Q02241;H7BYN4	Kinesin-like protein KIF23	KIF23
30.1125	30.4378	30.4154	30.1445	30.0697	29.903	27505000	24085000	26860000	9747900	5930300	5568400	24	1.04697	0.282801	O94776;A0A024R534	O94776;A0A024R534	Metastasis-associated protein MTA2	MTA2
27.506	27.8251	27.7201	27.6078	27.3708	27.2249	7785000	6741700	6900400	2561200	1480700	1371200	13	0.904276	0.2826	Q8N9T8;B4DUT2;A0A024R7C4;B4DUY9;B7ZLF4;H0YFD2;F8WFC1;H0YG91;H0YH26	Q8N9T8;B4DUT2;A0A024R7C4;B4DUY9	Protein KRI1 homolog	KRI1
22.8942	23.0915	23.5147	22.4721	22.3201	23.8605	250140	238520	314660	95467	57466	56618	2	0.209157	0.282564	Q13425;A0A024R732;H7BY41;H0YCS0	Q13425;A0A024R732;H7BY41;H0YCS0	Beta-2-syntrophin	SNTB2
30.8458	31.1274	31.1268	30.7213	30.9321	30.6022	53293000	45747000	51881000	16562000	14964000	11306000	1	0.980844	0.28148	B7Z6D5;Q96GQ7;A0A087X059;Q3MI07;A0A087WYH5	B7Z6D5;Q96GQ7	Probable ATP-dependent RNA helicase DDX27	DDX27
25.6896	26.1486	26.1742	25.7377	25.9542	25.4764	6892200	5300500	8265300	2263600	1826400	852560	6	0.601572	0.281392	O95707;K7ERD7;K7EQV2;K7ESH8;K7EK50;A0A0A0MQS4;A8MYC1	O95707;K7ERD7;K7EQV2	Ribonuclease P protein subunit p29	POP4
31.2432	31.3156	31.3329	31.0894	31.2056	30.7529	81871000	99247000	113450000	47631000	34576000	26050000	9	0.950417	0.281286	Q6I9V5;P12236;Q59EI9;P12235;A0A0S2Z3H3;A8K787;V9GYG0;A0A0S2Z359;A0A0S2Z3C4;Q59EP7;Q9H0C2;O75961	Q6I9V5;P12236;Q59EI9;P12235;A0A0S2Z3H3;A8K787	ADP/ATP translocase 3;ADP/ATP translocase 1	SLC25A6;SLC25A4
26.3293	26.0393	26.4084	26.2738	25.7135	25.9459	1630200	1074600	1314200	481020	160850	165220	14	0.643026	0.281263	B4E266;Q9P2J5;B2RCM2;B4DER1;Q9H8E3;Q9NPU8;Q9HAM7;Q6NVI4;Q9NVP8;B3KXA9;Q0VGM8;Q9P0T1;A0A087WXY1;Q9NVC0	B4E266;Q9P2J5;B2RCM2;B4DER1;Q9H8E3	Leucine--tRNA ligase, cytoplasmic	LARS
29.6847	23.2149	23.5043	23.2157	23.3797	28.9652	37134000	621130	923780	504170	339120	5810000	18	0.0335223	0.281129	V9HWN7;P04075;H3BQN4;J3KPS3;H3BPS8;H3BUH7;H3BR04;H3BMQ8;A0A0M4FNU3;H3BU78;H3BR68;A4UCS9;A4UCT0;B7Z1Z9;B7Z1N6;B7Z1Y2	V9HWN7;P04075;H3BQN4;J3KPS3;H3BPS8;H3BUH7;H3BR04;H3BMQ8;A0A0M4FNU3	Fructose-bisphosphate aldolase A;Fructose-bisphosphate aldolase	ALDOA
26.7384	27.0648	27.0365	26.7883	26.7493	26.4588	6839600	5655000	6663600	1845100	1790400	1276900	9	0.889275	0.281085	Q9UNQ2;A8K9K8;A0A0C4DGB1;B4DRY2;D6RCL3	Q9UNQ2;A8K9K8;A0A0C4DGB1;B4DRY2;D6RCL3	Probable dimethyladenosine transferase	DIMT1
29.3615	29.7286	29.5578	29.407	29.3249	29.0734	11494000	11453000	10256000	3359400	2413800	1977400	39	0.89717	0.280889	Q9P275;A0A024R8V6;A0A075B784;B3KMW2;Q9H9C5;E9PEW0;K7EMM6;K7ELR5;Q8IXW9;K7EIH0;K7ERC1;K7EKN3;K7EKL7;K7ELT3;K7EQS0;K7EPT1;K7EIT7;K7EJI3;U3KQ92	Q9P275;A0A024R8V6;A0A075B784;B3KMW2	Ubiquitin carboxyl-terminal hydrolase 36	USP36
30.5131	30.9163	30.9175	30.4219	30.5318	30.5518	34391000	43065000	31051000	10449000	6716700	7609400	44	0.933121	0.28047	Q9UNX4;Q5TDG3;B3KMW5;Q59GA8;Q6PDA5	Q9UNX4;Q5TDG3	WD repeat-containing protein 3	WDR3
29.3606	29.806	29.995	29.4164	29.4796	29.4253	12199000	14095000	33673000	4788500	3889800	4030700	22	0.672293	0.28009	Q9UHI6;Q8TDR3;Q8NEH0;Q8IYV2;E9PJ60	Q9UHI6;Q8TDR3;Q8NEH0;Q8IYV2	Probable ATP-dependent RNA helicase DDX20	DDX20
29.5807	29.8139	29.7132	29.4387	29.5176	29.3161	113600000	91980000	80486000	24405000	17813000	16561000	11	1.44656	0.278446	Q53Z07;P32969;D6RAN4;H0Y9V9;E7ESE0;B4E1M5;B4DLV8;Q2NKY6;H0Y9R4	Q53Z07;P32969;D6RAN4;H0Y9V9;E7ESE0;B4E1M5;B4DLV8	60S ribosomal protein L9	RPL9
31.8071	31.3966	31.5709	31.2459	31.1784	31.5169	256100000	142250000	186540000	49099000	42220000	58295000	15	0.815899	0.277778	Q06830;A0A0A0MSI0;B2R4P2;A0A0A0MRQ5	Q06830;A0A0A0MSI0;B2R4P2	Peroxiredoxin-1	PRDX1
30.4075	30.6912	30.6388	30.2475	30.3258	30.3317	202320000	182560000	194080000	63143000	51293000	54794000	8	1.41562	0.27748	D3YTB1;P62910;A0A024R2G7;F8W727;D3YTI8;A0A090N8E7	D3YTB1;P62910;A0A024R2G7;F8W727	60S ribosomal protein L32	RPL32
29.4555	29.9602	29.9746	29.5712	29.5669	29.421	15045000	14561000	16060000	5274100	3738200	3452000	36	0.712396	0.277073	A0A087WWP4;Q96T37;Q59EY1	A0A087WWP4;Q96T37	Putative RNA-binding protein 15	RBM15
26.5813	26.8417	26.7348	26.5461	26.5422	26.2395	8134800	7072200	7211400	2955800	2186400	1858700	1	1.02631	0.276701	A0A0A0MRF3;Q53GI4;Q15561;H0YGS2;A0A0S2Z4E5;D3DUQ6;H0YEJ9;Q96G15;Q99594;Q71U35;Q15562;A0A024QZE2;A0A024QZD8;A0A0S2Z4F2;H0YG62;H0Y7B0;H0YCZ6	A0A0A0MRF3;Q53GI4;Q15561;H0YGS2;A0A0S2Z4E5;D3DUQ6;H0YEJ9;Q96G15;Q99594;Q71U35;Q15562;A0A024QZE2;A0A024QZD8;A0A0S2Z4F2;H0YG62	Transcriptional enhancer factor TEF-3;Transcriptional enhancer factor TEF-5;Transcriptional enhancer factor TEF-4	TEAD4;TEAD1;TEAD3;TEAD2
27.0064	27.1502	27.4658	26.9176	26.8411	27.04	2725800	2419100	3283600	677850	552800	410090	13	0.865555	0.274537	Q9HC39;Q9HBB9;I3L2C7;Q8WUM5;P57678;I3L4A4;I3L399;I3L1J7;E7EN12;B4DZ29;I3L4M4	Q9HC39;Q9HBB9;I3L2C7;Q8WUM5;P57678	Gem-associated protein 4	GEMIN4
30.691	31.1961	31.4304	30.8593	30.6662	30.972	115240000	113950000	155930000	47431000	29310000	38193000	12	0.507663	0.27334	Q13247;A8K588;Q59GY3;V9HVZ0;B5BU15	Q13247;A8K588;Q59GY3;V9HVZ0	Serine/arginine-rich splicing factor 6	SRSF6
30.3817	30.2989	30.666	30.1722	30.1248	30.2296	117360000	102340000	127150000	91299000	24333000	22600000	14	1.11517	0.273274	P62081;B5MCP9;Q59FS3	P62081;B5MCP9	40S ribosomal protein S7	RPS7
30.8281	30.8489	30.9698	30.6478	30.6132	30.5706	52828000	33432000	40211000	14661000	12909000	10689000	32	2.2706	0.271767	A0A0D9SFB3;A0A0D9SG12;O00571;B5BTY4;A0A0D9SF53;Q59GX6;O15523;A0A024R9A4;B4DLU5;Q5S4N1;B4E010;B4E132;A0A0J9YVQ7;C9J081;B4E3C4;A0A087WVZ1;C9J8G5;A0A087WX09;B4DLA0;A0A0J9YYH6;D6RCM4;Q9NQI0;H0Y960	A0A0D9SFB3;A0A0D9SG12;O00571;B5BTY4;A0A0D9SF53;Q59GX6;O15523;A0A024R9A4;B4DLU5;Q5S4N1;B4E010	ATP-dependent RNA helicase DDX3X;ATP-dependent RNA helicase DDX3Y	DDX3X;DDX3Y
30.7767	30.9977	30.9917	30.8148	30.6195	30.517	103480000	80239000	98571000	34802000	23101000	22789000	22	1.12439	0.271637	Q9UMS4;F5GY56;H0YGF3;F5H2I0;H0YGZ5	Q9UMS4	Pre-mRNA-processing factor 19	PRPF19
27.2583	27.7438	27.5756	27.1251	27.1694	27.4695	6060600	4271100	5918200	1482100	615960	757240	18	0.690652	0.271207	Q15022;J3QQW9;A8K1U9	Q15022;J3QQW9;A8K1U9	Polycomb protein SUZ12	SUZ12
23.7931	23.9525	24.3077	23.7423	23.9729	23.5249	848100	790410	958880	290160	292660	0	2	0.608916	0.271095	E9PIW9;Q6SPF0	E9PIW9;Q6SPF0	Atherin	SAMD1
25.2834	25.2257	25.1441	24.7834	25.1602	24.8987	3675100	3444400	4222200	1206300	1442800	1131900	3	1.07126	0.270241	P17152;B7Z587	P17152;B7Z587	Transmembrane protein 11, mitochondrial	TMEM11
27.3156	27.6868	27.7166	27.2575	27.2697	27.3846	6097300	7718800	7023100	2032100	726830	1024600	13	0.930288	0.269046	O95453;B3KN69;H3BRK1;F5H1Z4;B4E0E8	O95453;B3KN69	Poly(A)-specific ribonuclease PARN	PARN
30.1315	30.3907	30.2921	29.9877	30.0635	29.9577	339190000	245940000	264490000	87652000	73637000	65443000	10	1.51573	0.268456	P62263;H0YB22;E5RH77;A4D1M5	P62263;H0YB22;E5RH77	40S ribosomal protein S14	RPS14
24.866	25.3795	25.4367	25.0385	24.9383	24.9027	508150	907500	1778400	248030	186920	209430	6	0.650727	0.267605	B4DXX1;Q7Z2T5;B2R713	B4DXX1;Q7Z2T5;B2R713	TRMT1-like protein	TRMT1L
31.4697	31.7169	31.6015	31.4596	31.4274	31.1074	268680000	221760000	212740000	83136000	58784000	53429000	18	0.9284	0.264597	P18124;A0A024R814;A8MUD9;O95036;C9JIJ5;C9JZ88	P18124;A0A024R814;A8MUD9;O95036	60S ribosomal protein L7	RPL7;WUGSC:H_RG054D04.1
30.1197	30.3745	30.4229	30.0284	30.1589	29.9446	44310000	46125000	35063000	10046000	7076600	6408700	23	1.09029	0.261708	Q969X6;H3BSH7;A0A0J9YWM9;A0A0J9YWK2;A0A0J9YXV4;H3BPD7;I3L4T9;J3KSI1;H3BRM8;J3KSE6;J3KTR0;A0A0J9YX18	Q969X6;H3BSH7;A0A0J9YWM9;A0A0J9YWK2	Cirhin	CIRH1A
31.3479	31.5376	31.4837	31.2661	31.2199	31.0997	162260000	128110000	146230000	54550000	42209000	37880000	16	1.59503	0.261213	A8K4T9;Q53GL6;Q5QPL9;Q9UKM9;Q5QPM1;Q5QPM0;B4DSJ1;Q5QPM2	A8K4T9;Q53GL6;Q5QPL9;Q9UKM9;Q5QPM1;Q5QPM0;B4DSJ1;Q5QPM2	RNA-binding protein Raly	RALY
25.202	24.5985	25.1334	25.0781	23.8299	25.251	473810	341040	551760	283370	74140	281060	3	0.205017	0.258262	Q8N766;Q5TG59;H7C4E3	Q8N766	ER membrane protein complex subunit 1	EMC1
32.8432	33.2935	33.319	32.928	33.0017	32.7553	236740000	235910000	274510000	93573000	71182000	67742000	42	0.683488	0.256903	P17844;J3KTA4;B5BUE6;B4DN41;B4DNG2;Q7Z2V5;Q59E92;J3QRQ7;J3QSF1;J3KRZ1;J3KRX8;J3QR02;C1IK54;X6RLV5;J3QKN9;J3QRN5;J3QS79;J3QLG9;J3QR62	P17844;J3KTA4;B5BUE6;B4DN41;B4DNG2;Q7Z2V5;Q59E92	Probable ATP-dependent RNA helicase DDX5	DDX5;DKFZp686J01190
25.8678	25.9133	25.7707	26.2372	25.4544	25.0908	3045900	2250800	2696800	1238300	641040	426690	3	0.30665	0.256495	Q5VT66;H7BYZ9;X6RIL1;F6V6Z1;H0YDX4	Q5VT66;H7BYZ9;X6RIL1	MOSC domain-containing protein 1, mitochondrial	MARC1
24.9818	24.6487	24.7018	25.1222	24.9829	23.4596	2252500	1824600	2952000	873090	825700	134790	5	0.179336	0.255877	Q9BSD7;Q5TDE9;Q5TDF0	Q9BSD7;Q5TDE9;Q5TDF0	Cancer-related nucleoside-triphosphatase	NTPCR;C1orf57
31.7694	32.1491	32.1154	31.7607	31.879	31.6303	119360000	107740000	131040000	38340000	27666000	28624000	32	0.838086	0.254669	P46087;F5GWB7;F5H709;F5H5X6;F5H359;F5GYR3;F5H8G6	P46087	Putative ribosomal RNA methyltransferase NOP2	NOP2
28.8571	26.5902	26.7104	26.8122	26.903	27.6843	57391000	4727700	9193700	4900600	3504100	3566700	9	0.116838	0.252712	V9HWI5;P23528;G3V1A4;E9PP50;E9PK25;B4E112;E9PQB7;E9PLJ3;E9PS23;Q9Y281;Q549N0	V9HWI5;P23528;G3V1A4;E9PP50;E9PK25;B4E112;E9PQB7	Cofilin-1	CFL1
27.9296	28.2941	28.35	27.8349	27.9545	28.0293	23165000	17992000	25486000	6893700	4393300	3790200	7	0.811866	0.251697	P62873;B2R6K4;A0A024R056;F6UT28;B1AKQ8;F6X3N5;Q71UM6;B3KVK2;Q71UM7	P62873;B2R6K4;A0A024R056;F6UT28;B1AKQ8;F6X3N5	Guanine nucleotide-binding protein G(I)/G(S)/G(T) subunit beta-1	GNB1
23.7996	23.8218	23.6349	23.0668	23.7856	23.6491	209240	86682	84280	12281	0	0	2	0.478896	0.251608	B7ZLC8;A0A1W2PNZ9;Q15652	B7ZLC8;A0A1W2PNZ9;Q15652	Probable JmjC domain-containing histone demethylation protein 2C	JMJD1C
29.9993	30.1627	30.192	29.913	29.8596	29.8317	74501000	67567000	66108000	21320000	15617000	17660000	12	1.74583	0.249896	P52597;A0A024R7T3;B4DKS8;A0A1B0GW42	P52597;A0A024R7T3;B4DKS8	Heterogeneous nuclear ribonucleoprotein F;Heterogeneous nuclear ribonucleoprotein F, N-terminally processed	HNRNPF
26.2199	26.5091	26.4267	26.2891	25.9418	26.1756	2272300	1564600	2069800	816940	310470	614580	8	0.869525	0.249688	Q9H501;Q05C10;Q8IWH6;A0JLU5;Q3SWV1;Q6P6H6;A0A087WX71	Q9H501;Q05C10;Q8IWH6;A0JLU5	ESF1 homolog	ESF1
30.5973	30.9149	30.9902	30.6981	30.6828	30.3751	37079000	35954000	38912000	11188000	8831500	6509100	33	0.71086	0.24881	Q9H6R4;A0A0A0MRW6;B4DF80;B3KPN5;A0A0C4DFX0	Q9H6R4;A0A0A0MRW6;B4DF80	Nucleolar protein 6	NOL6
28.8748	29.3162	29.2288	29.0661	28.8683	28.7416	37794000	34142000	34701000	14152000	8715900	9201100	17	0.684669	0.247918	Q9H9Y2;X6R7Q1	Q9H9Y2	Ribosome production factor 1	RPF1
29.7542	26.5276	26.5483	26.6264	26.6592	28.8091	32069000	1847100	2543300	842340	476960	3873200	14	0.0660918	0.245124	P0DMV9;P0DMV8;A8K5I0;A0A0G2JIW1;A0A1U9X7W4;B4DNT8;Q59EJ3;B4DI39;B4DFN9;B4DWK5;B4E388;B4DVU9;B4E1S9;V9GZ37;B3KTT5;B4E1T6;B4DNX1;B4DNV4;Q9UQC1	P0DMV9;P0DMV8;A8K5I0;A0A0G2JIW1;A0A1U9X7W4;B4DNT8;Q59EJ3;B4DI39;B4DFN9;B4DWK5;B4E388;B4DVU9;B4E1S9;V9GZ37;B3KTT5		HSPA1B
29.2834	29.5875	29.7355	29.3694	29.3197	29.1849	39932000	38227000	42490000	13762000	9949600	11231000	8	0.781599	0.244111	H0Y714;Q96G21;E7ENR5;B8ZZ47;B9A008;F8WCN0	H0Y714;Q96G21;E7ENR5;B8ZZ47;B9A008	U3 small nucleolar ribonucleoprotein protein IMP4	IMP4
27.4066	27.5437	27.602	27.2098	27.5002	27.1182	3112900	2169000	2592700	860110	445720	462340	19	0.871641	0.241367	Q14146;A8K4P8;Q6PCC8;Q5VYD0	Q14146;A8K4P8;Q6PCC8	Unhealthy ribosome biogenesis protein 2 homolog	URB2
30.4628	26.6425	25.9758	27.105	27.2882	27.9709	33741000	1196800	714390	969630	893210	1354800	25	0.058128	0.238997	P22735;B0AZN7;A8K5N5;B0AZM8;B4DRV1;H0YMQ8;H0YN27;H0YLT9;G1APU8	P22735;B0AZN7;A8K5N5;B0AZM8;B4DRV1	Protein-glutamine gamma-glutamyltransferase K	TGM1
24.6168	24.1018	24.5259	24.7238	23.9452	23.8621	361450	278230	341770	123900	0	14764	4	0.305458	0.237792	P30414;A0A024R2N6;Q59EC3;Q6N014;Q6M1B8;A0A087WYW3;Q6MZH6	P30414;A0A024R2N6;Q59EC3;Q6N014;Q6M1B8;A0A087WYW3	NK-tumor recognition protein;Putative peptidyl-prolyl cis-trans isomerase	NKTR;DKFZp686N24126;DKFZp686J06106
26.2343	26.4313	26.5673	26.0358	26.3985	26.0859	12857000	11757000	9206700	3129900	3265900	2402600	5	0.73001	0.237579	Q86WX3;A0A024R1T1;F8WFE7	Q86WX3;A0A024R1T1	Active regulator of SIRT1	RPS19BP1
24.3135	24.0981	23.657	23.6293	23.837	23.8915	1243900	634850	584540	93220	0	0	2	0.494186	0.236928	B4DKC1;A0A0C4DFM1;Q92544;A0A024QYR3;F8WCN2;F2Z2L1;Q6ZTK5	B4DKC1;A0A0C4DFM1;Q92544;A0A024QYR3;F8WCN2;F2Z2L1;Q6ZTK5	Transmembrane 9 superfamily member 4	TM9SF4
27.607	27.563	27.7213	27.6994	27.2927	27.1908	11976000	6391000	9871800	3639400	2446700	2206200	10	0.658502	0.236132	P05549;Q96SH1;H7C5E5;C1K3N0;C9JXZ2;Q6VUC0;A8K557;Q92481;B2R9E2;Q92754;B2RAN6;H7C4N4;C9J6N8	P05549;Q96SH1;H7C5E5;C1K3N0	Transcription factor AP-2-alpha	TFAP2A
23.8746	24.2439	24.2836	23.7543	23.9998	23.9408	533340	584140	647990	125620	116980	156230	3	0.719923	0.235735	A0A0A1TE42;A0A0A1TTP8;Q9H6T0	A0A0A1TE42;A0A0A1TTP8;Q9H6T0	Epithelial splicing regulatory protein 2	ESRP2
25.0831	25.9375	26.0911	25.3322	25.3057	25.7694	2799700	1609700	2323700	392160	292410	627780	7	0.270408	0.234811	Q13895;H7BY94;F8WBL2	Q13895	Bystin	BYSL
27.6417	26.6833	27.3676	26.9066	27.1679	26.9172	34487000	14316000	30929000	4373000	5785000	4464900	7	0.322248	0.233668	P25398	P25398	40S ribosomal protein S12	RPS12
27.6253	28.298	28.4265	27.8614	27.8266	27.9637	8279500	7362200	8697300	2519600	1774600	2134600	14	0.389607	0.232694	Q15397;B2RDG4;S4R3K8	Q15397;B2RDG4	Pumilio domain-containing protein KIAA0020	KIAA0020
29.5769	29.659	29.4511	29.3925	29.3675	29.2301	22019000	15425000	22115000	5994200	4261100	3934200	25	1.37664	0.232297	Q6IBR0;P04843;Q96HX3;Q53EP4;B7Z4L4;B4DL99;B4DNJ5;F8WF32	Q6IBR0;P04843;Q96HX3;Q53EP4;B7Z4L4;B4DL99;B4DNJ5	Dolichyl-diphosphooligosaccharide--protein glycosyltransferase subunit 1	RPN1
32.0127	32.3567	32.4168	32.0831	32.0045	32.0058	128120000	111300000	133530000	46820000	30803000	32148000	47	0.833114	0.230916	P43243;A0A0R4J2E8;A8MXP9;D6REM6;Q68D11;D6R991;H0Y8T4;Q5CZA7;B3KM87;B4DRS1;B4DF66;Q9H4N1;D6R8Z5;Q68E03;D6RCM3;D6REK4;D6RBI2;D6RBK5;D6RE02;D6RIA2;D6RB45;A0A1B0GX04;D6R9F3;D6RAM9;D6RAY2;D6RBS2	P43243;A0A0R4J2E8;A8MXP9;D6REM6;Q68D11;D6R991	Matrin-3	MATR3;DKFZp686K23100
24.7505	24.4873	24.7174	23.8203	25.1521	24.2905	1583500	897410	688990	106790	442020	230040	4	0.226472	0.230796	O60884;A0A024R6S1;A0A087WT48;T2DN57;T2DPK5	O60884;A0A024R6S1;A0A087WT48	DnaJ homolog subfamily A member 2	DNAJA2
24.9592	24.9515	25.1634	25.1919	25.2061	23.9852	1473900	1695700	1872800	791810	437550	214120	4	0.218428	0.230282	Q9UK43;Q95HA6;Q13123;B2R5Y4;D6REL4;Q9H4P6;E7EQZ7;Q9Y3Z5;B4DEH2	Q9UK43;Q95HA6;Q13123;B2R5Y4;D6REL4;Q9H4P6;E7EQZ7;Q9Y3Z5;B4DEH2	Protein Red	CSA2;IK;DKFZp564B112
26.5783	26.9106	27.1439	26.5606	26.8258	26.5572	943700	975190	1309600	236400	257940	196310	18	0.543831	0.229705	Q96N67;B3KRG0;A0A1B0GWE0;B4DSH0;A4FU72;A0A1B0GUE9;A0A0C4DGY6;A0A1B0GVW2;A0A0U1RRC1;A0A0U1RQJ5;A2A369;D3DRH1;Q96HP0;Q8NF50	Q96N67;B3KRG0;A0A1B0GWE0;B4DSH0	Dedicator of cytokinesis protein 7	DOCK7
24.9492	25.4992	25.2898	25.0053	24.9437	25.1006	2664500	2908800	1851800	675220	659350	361990	5	0.619105	0.229556	Q96K37;A0A024R7G7;H7C1I0;C9JK45	Q96K37;A0A024R7G7;H7C1I0	Solute carrier family 35 member E1	SLC35E1
23.84	23.8258	23.6326	23.0621	24.6555	22.8926	1137800	755000	669390	0	0	0	2	0.151323	0.229368	Q8N9Z2;A0A0C4DGU7	Q8N9Z2;A0A0C4DGU7	Coiled-coil domain-containing protein 71L	CCDC71L
30.27	30.5026	30.4352	30.251	30.1241	30.1466	181620000	138600000	254420000	48571000	37072000	41855000	8	1.34678	0.228664	Q6NZ52;P46776;E9PJD9;Q9BQQ5;E9PLL6;E9PLX7	Q6NZ52;P46776;E9PJD9;Q9BQQ5;E9PLL6	60S ribosomal protein L27a	RPL27A;L27a
26.9784	27.1855	27.181	26.9527	26.9189	26.7895	5315300	4520700	4241900	1059700	551760	652150	13	1.26574	0.227896	Q9UG63;A0A090N7X1;A0A090N7Y2;C9JHK9;C9JZV3	Q9UG63;A0A090N7X1;A0A090N7Y2;C9JHK9;C9JZV3	ATP-binding cassette sub-family F member 2	ABCF2
27.4326	27.8401	27.9084	27.6801	27.3425	27.4778	26527000	22581000	28903000	10911000	6719700	7384800	10	0.566417	0.226929	Q9UMY1;A0A024QZW2;H7C2B1	Q9UMY1;A0A024QZW2;H7C2B1	Nucleolar protein 7	NOL7
25.5978	26.1052	26.0954	25.7525	25.9357	25.4296	1651800	1844200	2022500	512290	470850	236950	7	0.434863	0.226894	Q9H0H5;B2RE34;A0A024R136;F8VRD2;F8W1E5;F8W1T4;F8VV37;Q9H9L9;H0YIK5;Q9BZ74;F8VQF5;F8VYH6;F8VQZ5;F8VWX0;F8W0L1;F8VZ66;F8VV47;F8VWY4;F8VVE5	Q9H0H5;B2RE34;A0A024R136;F8VRD2	Rac GTPase-activating protein 1	RACGAP1
29.1631	29.6534	29.4691	29.3199	29.195	29.0919	22677000	27167000	26383000	9968000	6142700	6801800	17	0.649782	0.226327	J3QR07;Q96MU7;J3KRG5;J3KS01	J3QR07;Q96MU7	YTH domain-containing protein 1	YTHDC1
29.7473	29.6668	29.6741	29.4818	29.4605	29.4708	46202000	41557000	34987000	14559000	9158900	9985900	18	2.9815	0.225027	P23396;Q53G83;E9PL09;E9PPU1;F2Z2S8;H0YCJ7;H0YEU2;E9PQ96;E9PJH4;H0YF32;E9PK82;Q9NQS8;A7E2S3;E9PSF4;E9PQX2;H0YES8	P23396;Q53G83;E9PL09;E9PPU1;F2Z2S8;H0YCJ7;H0YEU2;E9PQ96;E9PJH4;H0YF32;E9PK82	40S ribosomal protein S3	RPS3
24.1983	24.5841	24.6069	24.9857	24.6802	23.0486	6709000	6055700	7060500	3774100	2203300	1484900	2	0.134656	0.224915	P62875	P62875	DNA-directed RNA polymerases I, II, and III subunit RPABC5	POLR2L
25.6112	25.7349	25.7136	25.5728	25.6208	25.1927	1077600	766140	814440	366400	286790	163730	0	0.731034	0.224493	H7C1M2;Q6ZRV7;J3QSZ5;H7C2G8	H7C1M2		SON
24.9467	25.6458	25.7755	25.294	25.1345	25.2667	498210	380540	633230	149780	347320	277340	4	0.356137	0.224234	Q96ST3;B3KQE3	Q96ST3;B3KQE3	Paired amphipathic helix protein Sin3a	SIN3A
24.2932	24.5791	24.5394	24.2943	24.3227	24.1254	484570	432180	484530	115740	61413	22722	6	0.962229	0.223104	Q6P4F7;H3BQ41;H3BR51	Q6P4F7	Rho GTPase-activating protein 11A	ARHGAP11A
26.1899	26.5185	26.5622	26.2576	26.2282	26.1158	4469300	4778900	4510000	1456800	1066000	1254000	5	0.825707	0.223044	Q9UBB5;O60535;X6RBL6;A0A024R2B8;J3KSA7;Q69YZ5	Q9UBB5;O60535;X6RBL6;A0A024R2B8	Methyl-CpG-binding domain protein 2	MBD2;NY-CO-41
27.2845	27.6389	27.4024	27.4033	27.1753	27.0851	6107800	5772000	4693200	2211000	1463600	1200500	7	0.716644	0.22073	H3BQM0;G4U4J3;Q8NDF8;B4DRJ7;Q5EBM7;Q53F79;A0A024R6Q7;B7ZLC1;E9PC61	H3BQM0;G4U4J3;Q8NDF8;B4DRJ7;Q5EBM7;Q53F79;A0A024R6Q7	PAP-associated domain-containing protein 5	PAPD5
26.6687	26.196	26.1177	26.4413	25.8442	26.0353	12805000	2788000	4394000	2611200	854350	1292900	10	0.375684	0.220531	P61160;B4DWQ5;Q8IY98;F5H6T1;B4DHK9;A0A1B0GWD0;A0A1B0GWH0	P61160;B4DWQ5;Q8IY98;F5H6T1;B4DHK9	Actin-related protein 2	ACTR2
27.101	27.4134	27.1151	27.1712	26.5905	27.2076	13498000	11984000	11167000	4815600	2332200	3494000	2	0.417714	0.220069	Q6Y1H2	Q6Y1H2	Very-long-chain (3R)-3-hydroxyacyl-[acyl-carrier protein] dehydratase 2	PTPLB
27.4165	27.7877	28.025	27.5725	27.4692	27.5318	27016000	20918000	28033000	6468500	5999400	4528200	9	0.536927	0.218597	Q9Y221;B3KM49;J3QRD6;J3QRR4;J3QLW7	Q9Y221;B3KM49	60S ribosome subunit biogenesis protein NIP7 homolog	NIP7
28.8139	29.0579	29.0195	28.8734	28.6754	28.6906	30673000	18653000	18819000	9562000	5249600	6611400	18	1.03166	0.217316	Q9NWT1;A0A0S2Z5C3	Q9NWT1;A0A0S2Z5C3	p21-activated protein kinase-interacting protein 1	PAK1IP1
27.2558	27.2256	27.5349	27.0132	27.2562	27.0956	12046000	7151900	12466000	2737400	2372800	2411400	10	0.827847	0.21714	P78346;Q5VU10;Q5VU11;B4DJR3	P78346;Q5VU10;Q5VU11	Ribonuclease P protein subunit p30	RPP30
24.5707	24.0903	23.7629	24.3815	24.4738	22.9187	1294300	503860	354360	237230	397190	180670	3	0.144818	0.216675	B7Z792;O75306;Q53HG2;B7Z9L2	B7Z792;O75306;Q53HG2	NADH dehydrogenase [ubiquinone] iron-sulfur protein 2, mitochondrial	NDUFS2
30.7879	31.2497	31.1719	30.8894	30.9276	30.7471	132470000	151800000	121230000	43673000	31273000	31589000	22	0.634136	0.215172	Q9BYG3;C9J808;B4DSM4;H7BZL0;C9J6C5	Q9BYG3;C9J808;B4DSM4	MKI67 FHA domain-interacting nucleolar phosphoprotein	MKI67IP
26.364	25.5874	25.89	25.7999	25.5701	25.8265	3808100	1783900	3081500	1072100	509840	876400	5	0.375253	0.214935	Q53R19;O15144;Q9BXV5;A0A024R408;G5E9S7;C9JTV5;G5E9J0	Q53R19;O15144;Q9BXV5;A0A024R408	Actin-related protein 2/3 complex subunit 2	ARPC2
28.585	28.7862	28.7732	28.5048	28.3518	28.6449	13919000	22939000	13936000	3308600	1969500	3361600	18	0.938974	0.214276	Q49A26;D3DUE6;K7EMM8;D3DUE7;K7EQB2;K7EPU6;K7EK70;K7ELL0	Q49A26;D3DUE6;K7EMM8;D3DUE7	Putative oxidoreductase GLYR1	GLYR1;N-PAC
24.5375	24.7488	24.4416	24.3587	24.4523	24.2748	1933600	1348700	1092500	432950	409370	207520	5	0.961502	0.214023	Q96QD9;A0A024R9K4;H9KVC6;H9KVC1	Q96QD9;A0A024R9K4;H9KVC6	UAP56-interacting factor	FYTTD1
30.4076	30.8876	30.9848	30.5074	30.4695	30.6623	138160000	107780000	147600000	41327000	31692000	20234000	14	0.496057	0.213617	Q08170;A8K644;A0A0D9SEM4;Q53F45;Q59EF5;B4DEM8;A0A0D9SGD2	Q08170;A8K644;A0A0D9SEM4;Q53F45;Q59EF5	Serine/arginine-rich splicing factor 4	SRSF4;SFRS4
30.3058	30.7144	30.5708	30.0894	30.4877	30.3841	74460000	77410000	67760000	21198000	21351000	24228000	25	0.549866	0.209946	Q15050	Q15050	Ribosome biogenesis regulatory protein homolog	RRS1
30.3234	30.6099	30.7167	30.3658	30.3261	30.3312	44553000	29457000	38493000	12293000	8240900	10715000	31	0.819449	0.208954	B4E0S6;O43143	B4E0S6;O43143	Putative pre-mRNA-splicing factor ATP-dependent RNA helicase DHX15	DHX15
29.3524	29.7753	29.6389	29.3907	29.5078	29.2449	20014000	17427000	17726000	6168100	4526100	4096900	20	0.642425	0.207734	Q9NYH9;B3KQ21;B3KX32;Q9P1J8;B4DSL9;B7Z9G4;J3KRR8;J3QSA7	Q9NYH9;B3KQ21;B3KX32	U3 small nucleolar RNA-associated protein 6 homolog	UTP6
30.4422	30.8049	30.8082	30.5669	30.5841	30.2826	21582000	18889000	22016000	7289100	5322700	4514100	45	0.594367	0.207246	H7BXY3;Q7L2E3;A0A024R2T6;Q6W6M7	H7BXY3;Q7L2E3;A0A024R2T6	Putative ATP-dependent RNA helicase DHX30	DHX30
26.0012	26.2892	26.0304	26.1066	25.8137	25.7798	17955000	14175000	12708000	6259700	3907900	4190900	2	0.679685	0.206914	Q71UM5;H0YMV8;C9JLI6	Q71UM5;H0YMV8;C9JLI6	40S ribosomal protein S27-like;40S ribosomal protein S27	RPS27L
29.3239	29.6135	29.615	29.3806	29.3723	29.1866	23218000	20739000	22510000	8469000	6331900	4824700	17	0.818117	0.20432	O43660;D6RA26;B7Z982;H0YA24;H0YAA2	O43660	Pleiotropic regulator 1	PLRG1
31.4505	31.7627	31.7512	31.4134	31.4594	31.4807	370490000	290590000	361200000	105180000	88168000	100120000	18	0.913249	0.203646	Q6NZ55;P26373;A8K4C8;J3QSB4;H3BTH3;J3KS98;B4DGL7;O60250;H3BUK8	Q6NZ55;P26373;A8K4C8;J3QSB4	60S ribosomal protein L13	RPL13
27.9842	28.1884	27.9928	27.7268	28.082	27.7571	35034000	28386000	30108000	10782000	8856000	7477700	6	0.690303	0.199828	P63000;A4D2P1;A4D2P0;A4D2P2;P15153;A0A024R1P2;A0A024R9T5;B1AH77;B1AH78;B1AH80;P60763;J3KSC4;J3QLK0	P63000;A4D2P1;A4D2P0;A4D2P2;P15153;A0A024R1P2	Ras-related C3 botulinum toxin substrate 1;Ras-related C3 botulinum toxin substrate 2	RAC1;RAC2
24.767	24.8388	25.2856	24.7655	24.5987	24.9292	667640	418610	1001400	193920	0	132180	7	0.456895	0.199344	D3DQA6;Q7L014;A8K6X3;A0A0C4DG89;D6RJA6	D3DQA6;Q7L014;A8K6X3;A0A0C4DG89	Probable ATP-dependent RNA helicase DDX46	DDX46
28.5537	28.3964	28.4536	28.2624	28.1085	28.4364	11862000	7816500	6461400	2624600	1844000	1871400	12	0.879231	0.198793	Q14974;B2RBR9;J3QR48;B7Z5M1;J3KTM9;B7Z752	Q14974;B2RBR9;J3QR48	Importin subunit beta-1	KPNB1
26.8379	26.7945	26.8078	26.7112	26.7428	26.3983	4075600	2797400	2748800	1197300	916290	807070	2	0.819976	0.195972	D3DUZ3;A0A0A0MRB1;H3BM18;X6RHM1;H3BR88;H3BVE6;H3BR65;X6RHR0;Q6K0P9	D3DUZ3		IFI16
23.889	24.362	24.4154	24.0952	24.6396	23.345	1227000	841510	1005900	279800	250610	244080	4	0.18112	0.195534	Q8IUF8;H0Y9L8	Q8IUF8;H0Y9L8	Bifunctional lysine-specific demethylase and histidyl-hydroxylase MINA	MINA
25.2152	25.4764	25.2921	24.8728	25.3725	25.1536	1554300	972230	987490	149920	171450	76203	7	0.522099	0.194943	P19447;A8K359;G3V1S1;B3KTH1;Q53HW5;B3KRG2;B4DTK4	P19447;A8K359;G3V1S1;B3KTH1;Q53HW5;B3KRG2	TFIIH basal transcription factor complex helicase XPB subunit	ERCC3
28.7068	28.6012	28.7245	28.5432	28.45	28.4549	112930000	76041000	89925000	24607000	26616000	27521000	5	1.785	0.194839	P61513;C9J4Z3;Q6P4E4;E9PEL3;G5E9R3;M0R0A1;M0R2L6;A6NKH3	P61513;C9J4Z3;Q6P4E4;E9PEL3;G5E9R3;M0R0A1;M0R2L6	60S ribosomal protein L37a	RPL37A
26.3999	26.6978	27.0028	23.3254	28.1264	28.0644	793630	620700	702530	144200	493010	520520	2	0.0414578	0.194782	Q8NDH2	Q8NDH2	Coiled-coil domain-containing protein 168	CCDC168
24.2312	23.7271	23.725	22.8774	23.5717	24.6522	447600	420400	611550	0	0	0	4	0.131354	0.193993	Q969R5;B3KPJ8;A0A0S2Z5X6;A0A0S2Z5Q2	Q969R5;B3KPJ8;A0A0S2Z5X6;A0A0S2Z5Q2	Lethal(3)malignant brain tumor-like protein 2	L3MBTL2
26.9051	27.2461	27.1727	26.9532	26.9267	26.8623	4937400	4549200	4615700	1393800	966740	913310	13	0.840332	0.193904	Q8N884	Q8N884	Cyclic GMP-AMP synthase	MB21D1
24.5023	24.7524	24.9432	25.0112	24.7373	23.871	1811000	1311100	647190	572610	312640	105450	4	0.202966	0.192844	Q9H147;H7C1J2;H7C1M5;F2Z2A4;H0Y501	Q9H147;H7C1J2;H7C1M5;F2Z2A4;H0Y501	Deoxynucleotidyltransferase terminal-interacting protein 1	DNTTIP1
24.3778	24.7819	24.8153	24.7804	24.0605	24.5565	876060	762580	1101800	330620	178670	238820	5	0.307871	0.192542	O60216;A0A024R9J0;E5RJW1;E5RJK5;B3KUT8;E5RFV8;E5RIN7;A0A140T8W2;E5RG18;E5RI01;E5RFZ5;Q9H4I0;F6KSS9	O60216;A0A024R9J0;E5RJW1;E5RJK5;B3KUT8;E5RFV8;E5RIN7	Double-strand-break repair protein rad21 homolog	RAD21
25.1019	25.0608	25.4899	24.9697	25.0217	25.0848	1381800	908480	1037500	257790	227300	152930	9	0.612937	0.192122	Q2L6I2;Q8NE71;A0A1U9X609;Q59F96;H0YGW7;A0A0G2JIC2;B4DNU2;F5GYK6;A0PJ72;Q5STZ8	Q2L6I2;Q8NE71;A0A1U9X609;Q59F96;H0YGW7	ATP-binding cassette sub-family F member 1	ABCF1
26.2637	26.3374	26.4554	26.0437	26.2642	26.1729	2123700	2766100	3735900	1019800	1392400	1129600	7	1.06222	0.191932	Q8WWY3;E7EVX8;B4DWW8;E7EU94;E7ESX0;E7EN72	Q8WWY3;E7EVX8;B4DWW8	U4/U6 small nuclear ribonucleoprotein Prp31	PRPF31
25.8984	25.8714	25.6935	25.7656	25.6023	25.5222	1705300	2042700	2142500	1051500	556160	427090	7	0.928056	0.191069	Q9ULX6;A0A140VKH3;B3KMD4;V9GZ50;Q9UF73;M0R1Y5;M0R010;M0QYT7	Q9ULX6;A0A140VKH3;B3KMD4;V9GZ50	A-kinase anchor protein 8-like	AKAP8L
27.0309	27.6509	27.3161	27.2202	27.2242	26.9811	22019000	22623000	18225000	7723800	5666700	4911100	6	0.413139	0.19081	A0A1W2PRV5;Q16637;E7EQZ4;I3QJX8;I6T6Y4;I2E4T1;I3QJX9;A0A076L8Z0;B4DP61;A0A0G2JRX5;I2E4T0;A0A0G2JRY6;Q9UNT8;H0YBZ9;I2E4S9;I2E4T2;I2E4T3;I2E4S7;A0A0G2JQN8	A0A1W2PRV5;Q16637;E7EQZ4;I3QJX8;I6T6Y4;I2E4T1;I3QJX9;A0A076L8Z0;B4DP61	Survival motor neuron protein	SMN1;SMN2
27.9153	28.2558	28.3148	28.041	28.1017	27.7746	2114000	2103700	2291700	491880	415620	454990	23	0.520512	0.189566	Q14573;Q59ES2;A6H8K3	Q14573;Q59ES2	Inositol 1,4,5-trisphosphate receptor type 3	ITPR3
26.1886	26.334	26.3358	26.301	26.1106	25.8791	782470	502980	636550	143680	139790	80612	5	0.651317	0.189212	Q9P2D1;A0A024R7V7;B4DLD8;Q5JB41;A0A087WU44;B4DIS0	Q9P2D1;A0A024R7V7	Chromodomain-helicase-DNA-binding protein 7	CHD7
26.8328	27.2996	27.2854	26.8529	27.2557	26.7441	14104000	13677000	15624000	3821400	4036000	2003700	9	0.359481	0.1884	Q9Y3C1;D6RIC3;A0A0C4DGU5;A0A087X2G6;Q9P0T8;B4E098;D6RC60;A0A087WU10	Q9Y3C1;D6RIC3;A0A0C4DGU5;A0A087X2G6;Q9P0T8	Nucleolar protein 16	NOP16
28.8485	29.1685	29.0996	28.8796	28.876	28.8044	34972000	34611000	38079000	12818000	10403000	8863800	5	0.860222	0.18555	Q6FHM2;P62879;C9JXA5;E7EP32;C9JIS1;C9JZN1;C9JD14;F5H8J8;F5H100;F5H0S8;Q59G26;E9PCP0;P16520;F1T0G5;F1T0G4	Q6FHM2;P62879;C9JXA5;E7EP32;C9JIS1;C9JZN1	Guanine nucleotide-binding protein G(I)/G(S)/G(T) subunit beta-2	GNB2
24.2506	24.166	24.5766	24.3841	24.1226	23.9322	823330	665200	1214100	210650	63286	201490	6	0.43718	0.184795	B4DVV1;F5H4B6;B4DQ15;Q8IZ83;M0QY06	B4DVV1;F5H4B6;B4DQ15;Q8IZ83	Aldehyde dehydrogenase family 16 member A1	ALDH16A1
30.3957	30.6468	30.7475	30.3495	30.3997	30.4865	276530000	215590000	257850000	98100000	72275000	80472000	3	0.758574	0.184771	Q9UNX3;E5RIT6;E5RHH1	Q9UNX3;E5RIT6	60S ribosomal protein L26-like 1	RPL26L1
29.4971	29.9753	29.8148	29.6861	29.5996	29.4501	75367000	78102000	77813000	35241000	20782000	21469000	10	0.515031	0.183766	Q07666;B2R7B5;B4DDX2;B4E043;B3KTS3;Q5VWX1	Q07666;B2R7B5;B4DDX2;B4E043	KH domain-containing, RNA-binding, signal transduction-associated protein 1	KHDRBS1
29.2794	29.9093	29.9855	29.4414	29.5621	29.6233	7383200	8255600	10305000	2196700	2128400	2177000	46	0.325958	0.18244	O95602;B7ZKR9;B9ZVN9;B7Z284;B7Z8X7;Q53T12;Q96AG9;Q9H6T2;Q8TCW3	O95602;B7ZKR9;B9ZVN9;B7Z284;B7Z8X7;Q53T12	DNA-directed RNA polymerase I subunit RPA1;DNA-directed RNA polymerase	POLR1A
23.8671	23.7803	23.6076	23.4007	23.8335	23.4829	124060	84590	129300	54953	37318	13905	3	0.513534	0.179281	Q9NQX4;H0YMK3;H0YM93;B4DVH2;B4E268;H0YM96	Q9NQX4;H0YMK3;H0YM93;B4DVH2;B4E268	Unconventional myosin-Vc	MYO5C
28.6196	28.8626	29.1742	28.7605	28.6135	28.7497	36167000	56574000	43508000	14546000	8833600	11231000	8	0.457849	0.177574	J3QLE5;Q66K91;Q5XPV6;B4DVS0;X5DP00;P63162;P14678;Q15182;Q6LBS1;Q9UIS4;Q53HE7;J3KRY3;S4R3P3	J3QLE5;Q66K91;Q5XPV6;B4DVS0;X5DP00;P63162;P14678;Q15182;Q6LBS1;Q9UIS4;Q53HE7;J3KRY3;S4R3P3	Small nuclear ribonucleoprotein-associated protein;Small nuclear ribonucleoprotein-associated protein N;Small nuclear ribonucleoprotein-associated proteins B and B	SNRPN;SNRPB
25.3346	25.7405	25.66	25.2801	25.4702	25.4563	868810	785400	861680	156540	201830	173850	5	0.565673	0.176163	Q6PD62;A8K6X9;H0YCE8	Q6PD62;A8K6X9	RNA polymerase-associated protein CTR9 homolog	CTR9
24.2816	23.9308	23.9902	23.0252	24.2897	24.3634	1790200	614340	1853700	411860	169390	497130	3	0.145071	0.17483	A0A0A6YYA0;Q9Y3B3;Q3B7W7;B4E2C1;G3V2Y2	A0A0A6YYA0;Q9Y3B3;Q3B7W7;B4E2C1	Transmembrane emp24 domain-containing protein 7	TMED7
28.6799	29.1294	29.1879	28.7741	28.9366	28.7628	7842300	7869200	9648800	2756800	1822800	2148200	23	0.44072	0.174583	Q9H9Y6;B7Z1W6;Q6DKI9;Q9BSR4;Q4QRK8;Q9H6S8;Q9NVC2;C9JJG2;C9JS83;H7C0D9;F8WDS4;F8WAK7;F8WBB9;F8WCS3	Q9H9Y6;B7Z1W6;Q6DKI9;Q9BSR4;Q4QRK8	DNA-directed RNA polymerase I subunit RPA2;DNA-directed RNA polymerase	POLR1B
27.9627	28.2989	28.3979	27.8663	28.2049	28.0675	68283000	62936000	75655000	22094000	19854000	18803000	7	0.455352	0.173578	Q9UHA3;B3KP47;A0A024R5U8;H3BMQ2;H3BPF2	Q9UHA3;B3KP47;A0A024R5U8;H3BMQ2	Probable ribosome biogenesis protein RLP24	RSL24D1
25.9977	26.1862	25.9338	25.8724	25.9666	25.7591	4730900	3569800	8217900	1771400	1460600	1335700	6	0.830964	0.173208	F5H157;Q15286;F5H7F8;B4DTA6	F5H157;Q15286	Ras-related protein Rab-35	RAB35
29.379	29.5566	29.5821	29.4219	29.588	28.9921	37871000	29348000	37073000	12873000	11029000	8445000	8	0.383234	0.171919	P05141;Q6NVC0	P05141;Q6NVC0	ADP/ATP translocase 2;ADP/ATP translocase 2, N-terminally processed	SLC25A5
25.0494	25.1479	25.063	25.0724	24.8606	24.8121	2063000	1552300	890500	768920	218420	482580	4	0.937409	0.171734	Q8WWU0;Q8WXB7;E9PEP7;P08048;P17010;A0A024RC04;B7ZKJ5;Q9BYX9	Q8WWU0;Q8WXB7;E9PEP7;P08048;P17010;A0A024RC04;B7ZKJ5	Zinc finger Y-chromosomal protein;Zinc finger X-chromosomal protein	ZFX;ZFY
27.8718	27.7256	27.612	27.5168	27.6048	27.5755	18070000	9976500	14397000	2940600	3559500	2956900	8	1.00776	0.170793	P55795;B4DFK9;B4DP00	P55795;B4DFK9;B4DP00	Heterogeneous nuclear ribonucleoprotein H2;Heterogeneous nuclear ribonucleoprotein H2, N-terminally processed	HNRNPH2
26.9568	27.2361	27.4982	27.1084	27.0147	27.0649	3875500	3604100	5218700	1185700	717330	723860	15	0.455915	0.167708	Q99661;A8K3S3;A0A140VKF1;B7Z6Q6;B7Z7M6;Q5JR91;Q8N5N1;Q5JR89	Q99661;A8K3S3;A0A140VKF1;B7Z6Q6;B7Z7M6;Q5JR91;Q8N5N1;Q5JR89	Kinesin-like protein KIF2C	KIF2C
28.4261	28.2522	28.5757	28.129	28.3272	28.2961	20970000	13253000	17857000	5362300	4132800	5637200	5	0.678902	0.167215	P62136;A0A140VJS9;B3KXM2;E9PMD7;B4DNE3;F5H1L6;F5H037;C0STL0	P62136;A0A140VJS9;B3KXM2;E9PMD7	Serine/threonine-protein phosphatase PP1-alpha catalytic subunit;Serine/threonine-protein phosphatase	PPP1CA
24.018	24.1597	24.2833	22.4578	24.7276	24.774	733920	579510	472570	0	0	0	3	0.0765552	0.167178	B4DYU9;Q13416;A0A024R411;C9JK08;B8ZZ80	B4DYU9;Q13416;A0A024R411	Origin recognition complex subunit 2	ORC2
25.1758	25.7235	25.5765	25.5139	25.0428	25.4181	2556800	2731300	2658500	794200	483370	569970	4	0.313334	0.166992	P78549;E5KTI5;H3BUV2;B4DPA0;H3BPD5;H3BRL9	P78549;E5KTI5;H3BUV2;B4DPA0;H3BPD5	Endonuclease III-like protein 1	NTHL1
27.0108	26.9583	26.7581	26.4589	26.7032	27.0667	22681000	14951000	10056000	2573900	4776400	5898300	4	0.35944	0.166141	P51571;A6NLM8	P51571;A6NLM8	Translocon-associated protein subunit delta	SSR4
25.4004	25.0166	25.4688	24.8755	25.2556	25.259	2458800	983110	1449200	755850	521920	395670	6	0.363491	0.165209	P41091;Q2VIR3;F8W810;H7BZU1	P41091;Q2VIR3;F8W810	Eukaryotic translation initiation factor 2 subunit 3;Putative eukaryotic translation initiation factor 2 subunit 3-like protein	EIF2S3;EIF2S3L
25.2393	25.6605	25.5028	25.551	25.4182	24.9436	5943400	3301300	3357600	1307500	954950	724150	2	0.299259	0.16327	P51153;Q504R6;A0A087WWB9;D3DV69;A0A024RB27;Q53SX4;H0YLJ8;H0YL94;B3KTE3;H0YMN7;G5ELZ6;G5ELZ5;Q59EP4;Q9H1C9;E9PLD0;E7END7;B7Z8M7;H0YNE9;B4DMS1;Q9H0U4;Q92928;Q6FIG4;Q5U0I6;P62820;Q92930;P59190;G5EMR8	P51153;Q504R6;A0A087WWB9;D3DV69;A0A024RB27	Ras-related protein Rab-13	RAB13;hCG_1996054
30.3238	30.6347	30.7808	30.4217	30.3887	30.4419	125500000	70006000	99420000	35637000	24596000	30909000	12	0.526366	0.162297	Q549U1;Q13595;F8WEH2	Q549U1;Q13595	Transformer-2 protein homolog alpha	HSU53209;TRA2A
27.422	21.4351	22.2897	24.0342	23.9729	22.6572	4196900	60155	147920	0	0	45461	13	0.0280985	0.160847	P51659;B2R659;A0A0S2Z4J1;B4DDM5;E7EWE5;B4DSD0;E7ER27;G5E9S2;B3KSP2;E7ET17;B4DI68;Q59H27;E7EPL9;A0A0S2Z4Q6;A0A0S2Z460	P51659;B2R659;A0A0S2Z4J1;B4DDM5;E7EWE5;B4DSD0;E7ER27;G5E9S2;B3KSP2;E7ET17;B4DI68	Peroxisomal multifunctional enzyme type 2;(3R)-hydroxyacyl-CoA dehydrogenase;Enoyl-CoA hydratase 2	HSD17B4
28.556	28.9813	28.9573	28.7688	28.5505	28.6961	6733700	5933600	7530400	2558100	1230800	2089800	21	0.452152	0.159719	O75533;H7C341;A0JLT9;Q32Q20;A0PJH5;Q7Z497;Q9NTB4;F8WC19;A8K355;B4DGZ4	O75533	Splicing factor 3B subunit 1	SF3B1
25.0274	25.2835	25.5144	25.3712	24.4696	25.5091	490450	578150	646320	320870	55754	101350	6	0.168491	0.158461	Q13045;B4DIX0;Q59H95;J3KS54;J3KS39;B4DNA8	Q13045;B4DIX0;Q59H95	Protein flightless-1 homolog	FLII
25.9558	26.3963	26.5646	25.8744	26.1584	26.4147	4788800	4277800	5516300	1128400	1457700	1490100	4	0.260307	0.156404	B4E106;B4DKS0;P53985;A0A024R0H1;Q5T8R3;Q5T8R5;B2R6A5	B4E106;B4DKS0;P53985;A0A024R0H1;Q5T8R3;Q5T8R5;B2R6A5	Monocarboxylate transporter 1	SLC16A1
27.0143	27.3877	27.7329	27.1765	27.3935	27.0965	2615700	1937800	3633200	559690	733560	707130	16	0.278105	0.156136	F5H658;Q86YB2;Q14562;A8K6J9;B7Z8F4;Q86X36;B4DFD7;K7END7;A0A140T947;B4DM30;B4DZ28;A0A1U9X7L7;A0A1U9X7L6;Q5SQH4;O60231;B4DET0;Q92620;A8K6G9	F5H658;Q86YB2;Q14562;A8K6J9;B7Z8F4;Q86X36;B4DFD7	ATP-dependent RNA helicase DHX8	DHX8
29.1085	29.306	29.408	29.2624	29.2078	28.8845	19422000	16434000	19172000	5820900	4782900	4025400	16	0.457441	0.155962	B0AZS5;O00139;B4DM85;D6R9M0;H0Y8H2	B0AZS5;O00139;B4DM85	Kinesin-like protein KIF2A	KIF2A
29.4656	29.5441	29.402	29.3228	29.3082	29.3181	205110000	229470000	150150000	65245000	40722000	45128000	9	1.69277	0.154186	Q7Z4W8;P35268;K7ERI7;K7EMH1;K7ELC4;K7EP65;K7EKS7;K7EJT5;C9JYQ9;Q6P5R6;H0Y8C2	Q7Z4W8;P35268;K7ERI7;K7EMH1;K7ELC4;K7EP65;K7EKS7	60S ribosomal protein L22	RPL22
32.0649	32.1128	32.3034	32.0316	32.0281	31.9615	244550000	183190000	262170000	91867000	67526000	71113000	12	0.93923	0.153315	P31943;G8JLB6;E9PCY7;D6RBM0;H0YB39;D6RIT2;D6RIU0;E7EQJ0;D6RAM1;D6R9T0;D6RFM3;E7EN40;D6RDU3;D6RJ04;D6RIH9;Q68DG4;H0YBD7;E5RGV0;D6RDL0;H0YBG7;D6RF17;B4DP51;D6R9D3;E5RGH4;E5RJ94;H0YAQ2	P31943;G8JLB6;E9PCY7;D6RBM0;H0YB39;D6RIT2;D6RIU0	Heterogeneous nuclear ribonucleoprotein H;Heterogeneous nuclear ribonucleoprotein H, N-terminally processed	HNRNPH1
26.9392	27.2325	27.2624	27.2462	27.0194	26.709	4176400	3608800	4069200	1631900	779200	456330	17	0.338981	0.153169	P53350;B2R841;B4E083;Q59GD0;Q58A51;D3DWF3;I3L387;I3L2H5;I3L309	P53350;B2R841;B4E083;Q59GD0;Q58A51	Serine/threonine-protein kinase PLK1	PLK1;Plk-1 delta
28.9681	29.2794	29.2931	29.0179	29.2084	28.8552	9439900	15395000	8023500	3314100	2233100	1771100	22	0.447034	0.153062	E9PF10;O75694;A0A024R071;B4DLT2;B3KMK3;D6RA13	E9PF10;O75694;A0A024R071;B4DLT2	Nuclear pore complex protein Nup155	NUP155
25.6919	26.063	26.1163	26.1019	25.539	25.7734	459550	542040	612380	304700	165180	139340	12	0.292322	0.152286	Q9H2Y7;A0A024R9R5;A0A0C4DGM5;Q86T35;H3BS99;H3BNX5;B4DGC7;U3KQH7;H3BRD4;Q0VGA6	Q9H2Y7;A0A024R9R5;A0A0C4DGM5;Q86T35;H3BS99	Zinc finger protein 106	ZNF106;ZFP106
29.1051	29.2176	29.21	28.9306	29.0436	29.1018	48880000	44565000	43267000	12265000	13307000	17623000	12	1.15493	0.152271	P62826;B5MDF5;J3KQE5;F5H018;H0YFC6;B4DV51;Q96QB7;Q0EFC9;A0A087X0W0	P62826;B5MDF5;J3KQE5;F5H018;H0YFC6	GTP-binding nuclear protein Ran	RAN
25.0067	25.0313	24.8088	24.8236	24.9958	24.5735	2022400	1274300	1171100	439200	465190	265720	5	0.462437	0.151293	P26572;Q59G70;B3KQW5;Q8NBL8;B3KQ18;D6RA48;D6RBS3;D6RAK2;D6R9U2;D6RD15;D6RB69;D6RHZ8;D6RF69	P26572;Q59G70;B3KQW5;Q8NBL8;B3KQ18	Alpha-1,3-mannosyl-glycoprotein 2-beta-N-acetylglucosaminyltransferase	MGAT1
26.7694	26.7761	27.2462	26.8757	26.8637	26.6041	5064000	4364400	7238100	2319900	1382400	1268600	10	0.341351	0.149343	Q8IW76;B7ZKK7;P19525;Q05CP4;Q6PK38;F8WBH4;C9JZT2	Q8IW76;B7ZKK7;P19525;Q05CP4;Q6PK38	Interferon-induced, double-stranded RNA-activated protein kinase	EIF2AK2
28.9428	29.1327	29.322	28.891	28.9884	29.0705	20022000	10582000	15085000	4907400	2960900	3368400	21	0.544344	0.149197	Q9H8H0;J3QR28;J3QLQ6	Q9H8H0	Nucleolar protein 11	NOL11
25.7689	26.175	26.1496	25.8504	25.818	25.9789	1064700	1444500	1570400	427650	238370	223770	4	0.45757	0.148719	Q92922;Q58EY4;Q05CR1;B4DYQ1;Q05BW5;B4DYF9;F8WE13	Q92922;Q58EY4;Q05CR1;B4DYQ1;Q05BW5;B4DYF9	SWI/SNF complex subunit SMARCC1	SMARCC1
23.8974	23.4307	23.3903	23.7814	22.9631	23.5302	493720	283660	322480	135330	102540	82022	2	0.194697	0.147922	P18031;A8K3M3;B4DSN5	P18031;A8K3M3;B4DSN5	Tyrosine-protein phosphatase non-receptor type 1;Tyrosine-protein phosphatase non-receptor type	PTPN1
28.7355	28.7652	29.0029	28.9275	28.8769	28.2571	8182400	6203200	6849200	2936400	2094600	946890	26	0.252579	0.14739	E9PDF6;O43795;B0I1S9;B3KQI2;H7C2Y7;E7EQD9;Q05CR5;C9JYW1;Q14777;C9JUP5;A0A0U1RRI3;Q9UBC5;B2R643;Q13871;C9K0I9;G3V342;B4DTV4	E9PDF6;O43795;B0I1S9	Unconventional myosin-Ib	MYO1B
30.1617	30.4825	30.5506	30.3321	30.1421	30.2794	42132000	32609000	38738000	12228000	8379400	9050400	23	0.481966	0.147051	Q15061;C9IZK7;C9JEE7	Q15061	WD repeat-containing protein 43	WDR43
28.6099	28.8437	28.791	28.8241	28.6021	28.3791	7626100	6241100	7654400	2795300	1458400	1448300	25	0.426323	0.146428	P41252;Q59G75;J3KR24;Q7Z3U5;A0A0A0MSX9;Q7Z355;Q6P0M4;B4DVX2;Q7L4K8;Q9P1N9;Q5TCD1;Q5TCC6	P41252;Q59G75;J3KR24;Q7Z3U5;A0A0A0MSX9;Q7Z355;Q6P0M4;B4DVX2;Q7L4K8	Isoleucine--tRNA ligase, cytoplasmic	IARS;DKFZp686L0869;DKFZp686L17145
28.6055	29.0244	29.3209	28.6864	28.7562	29.0747	7377200	6488400	10144000	2526500	1588800	2529200	34	0.237548	0.144534	C9J2Y9;P30876;B4DHJ3;B4DH29;A0A1W2PPT5;C9J4M6;B4DR40;B2WTN6	C9J2Y9;P30876;B4DHJ3;B4DH29;A0A1W2PPT5;C9J4M6;B4DR40	DNA-directed RNA polymerase;DNA-directed RNA polymerase II subunit RPB2	POLR2B
27.4188	27.6681	27.8225	27.7554	27.4384	27.2841	5730300	5270800	5651400	1590800	990870	1331000	15	0.324965	0.143854	P42166	P42166	Lamina-associated polypeptide 2, isoform alpha;Thymopoietin;Thymopentin	TMPO
29.5478	29.8765	30.0873	29.632	29.7114	29.7369	57196000	44610000	66242000	22397000	15703000	20118000	14	0.376688	0.143737	Q9UKD2;A0A024RAE1;B4DHZ2	Q9UKD2;A0A024RAE1	mRNA turnover protein 4 homolog	MRTO4
27.9052	28.1189	28.2456	28.011	28.0379	27.7923	8058900	6554000	8595100	2878200	2187100	2057700	18	0.493823	0.142853	Q96I24;A0A024R8A7	Q96I24;A0A024R8A7	Far upstream element-binding protein 3	FUBP3
24.868	25.0748	24.9657	25.5049	24.1269	24.8492	1279000	3062900	594490	467680	0	236600	4	0.130114	0.142506	O95365	O95365	Zinc finger and BTB domain-containing protein 7A	ZBTB7A
29.4847	29.0462	29.0834	29.0894	28.9984	29.1022	125600000	70433000	82310000	38211000	26590000	20150000	3	0.417982	0.141452	Q5RKT7;P62979;B2RDW1;Q8WYN9	Q5RKT7;P62979;B2RDW1;Q8WYN9	Ubiquitin-40S ribosomal protein S27a;Ubiquitin;40S ribosomal protein S27a	RPS27A
23.7048	23.327	23.577	23.1842	23.4715	23.5308	1223100	660090	858150	341030	280290	332040	2	0.384443	0.140823	K7EK18;K7EL40;A0A0S2Z5W9;A0A024R8Q0;A0A0S2Z5A5;A0A024R8V0;Q9UHD8;K7EIR4;K7EKN4;K7EN52;K7ENQ5;K7EJZ2;K7ELJ9;K7ER52;K7EIE4;K7EQD7	K7EK18;K7EL40;A0A0S2Z5W9;A0A024R8Q0;A0A0S2Z5A5;A0A024R8V0;Q9UHD8;K7EIR4;K7EKN4;K7EN52;K7ENQ5;K7EJZ2;K7ELJ9;K7ER52;K7EIE4;K7EQD7	Septin-9	2009-09-01
23.7934	23.9691	23.8129	23.8168	23.094	24.2486	541590	387140	338730	57876	46934	41078	3	0.15161	0.138706	Q8IXI2;H7BXZ6;J3KSR5;K7EIQ7	Q8IXI2;H7BXZ6	Mitochondrial Rho GTPase 1;Mitochondrial Rho GTPase	RHOT1
28.3377	28.3459	28.7823	28.3235	28.3048	28.423	32950000	23373000	38192000	12089000	6467000	10177000	10	0.384137	0.138206	Q01081;P0DN76;B5BU08;Q7Z780;Q8WU68;A0A1B0GW87;M0QYK5;Q69YM7;M0R2N4;K7EJH3;K7EJM7	Q01081;P0DN76;B5BU08;Q7Z780	Splicing factor U2AF 35 kDa subunit	U2AF1
24.3378	24.2402	24.0662	23.9909	23.3284	24.9186	573310	434280	385650	188520	0	37607	6	0.10419	0.135404	Q8TCJ2	Q8TCJ2	Dolichyl-diphosphooligosaccharide--protein glycosyltransferase subunit STT3B	STT3B
34.76	35.1405	35.2755	34.8362	34.8747	35.0595	6808300000	6823300000	9183400000	2885700000	2219300000	2113900000	1	0.329291	0.135214	Q71DI3;Q16695;B4E380;K7EMV3;B4DEB1;K7ES00;Q6NXT2	Q71DI3;Q16695;B4E380;K7EMV3;B4DEB1;K7ES00;Q6NXT2	Histone H3.2;Histone H3.1t;Histone H3;Histone H3.3C	HIST2H3A;HIST3H3;H3F3B;H3F3A;H3F3C
25.8504	26.0452	26.1841	25.7707	25.6497	26.2599	2377200	3020700	3421700	1058000	560760	768880	7	0.251132	0.133111	Q8IWS0;A0A0D9SGE8;Q5JRC6;B4E138	Q8IWS0;A0A0D9SGE8;Q5JRC6;B4E138	PHD finger protein 6	PHF6
30.0377	26.8269	26.1101	27.2676	27.465	27.8431	100800000	3935700	2268900	3722300	2468200	4395600	13	0.0369791	0.133032	O75223;A0A090N7V5;M0QZK8;B3KMN7;B8ZZK2;H7BZK5;A0A0B4J1Y4	O75223;A0A090N7V5;M0QZK8;B3KMN7;B8ZZK2	Gamma-glutamylcyclotransferase	GGCT
24.8061	25.0997	25.4044	25.5087	25.3832	24.0202	1157600	1558600	3152400	752690	436030	332320	7	0.0934013	0.132664	Q15024;B2RDZ9;A0A024R2P7;B4DIU0	Q15024;B2RDZ9;A0A024R2P7;B4DIU0	Exosome complex component RRP42	EXOSC7
26.8189	26.7127	26.5236	26.865	26.4635	26.3296	2958100	1496000	2053200	1025500	448960	530950	13	0.293555	0.132337	Q08J23;A0A140T9Y7	Q08J23	tRNA (cytosine(34)-C(5))-methyltransferase	NSUN2
27.897	28.0308	28.324	28.0085	27.8254	28.024	8294900	6805500	12472000	3063000	1890300	1945100	14	0.392156	0.131305	Q9NRG9;Q53HS1;F8VZ44;B4DDU7;H3BU82;F8VUB6;D9DBT1;D9DBT3;D9DBT0	Q9NRG9;Q53HS1;F8VZ44;B4DDU7;H3BU82	Aladin	AAAS
24.6502	24.5637	24.6979	24.4867	24.6106	24.4325	1982700	1147600	1349400	548010	448180	402040	3	0.903617	0.127322	Q53XM7;O95292;E5RK64;Q6ZSP7;B3KVU7;B4DNS4;Q6ZR82	Q53XM7;O95292;E5RK64;Q6ZSP7;B3KVU7	Vesicle-associated membrane protein-associated protein B/C	VAPB
26.907	27.666	27.4647	26.8112	27.2899	27.5587	12286000	14215000	12758000	3794400	3657000	5100100	6	0.148921	0.126013	Q92522	Q92522	Histone H1x	H1FX
32.3515	32.669	32.6582	32.5759	32.5566	32.1718	249110000	212630000	249680000	95473000	69213000	58399000	39	0.30256	0.124822	Q96PK6;A0A0S2Z4Z0;Q59GV2;A0A0S2Z567;B4DNG4;A0A0A6YYI9;A0A0S2Z5V2;F8WDX3;A0A0A0MSL8;B8ZZ74	Q96PK6;A0A0S2Z4Z0	RNA-binding protein 14	RBM14
28.2737	28.5729	28.897	28.5807	28.3866	28.403	20340000	20747000	24492000	8860000	4974800	6228600	9	0.260325	0.124435	Q92769;B3KUJ5;H3BM24;E5RH52;E5RG37;E5RFI6;E5RJ04;E5RGV4;E5RHE7;E5RFP9;E5RK19;Q59GB9	Q92769;B3KUJ5	Histone deacetylase 2;Histone deacetylase	HDAC2
30.1522	30.4812	30.5785	30.3041	30.2456	30.2908	19596000	27901000	22988000	7579300	5321200	5125200	40	0.402846	0.123792	O94906	O94906	Pre-mRNA-processing factor 6	PRPF6
30.1444	30.4279	30.5274	30.1542	30.1669	30.4082	201380000	152660000	184940000	70278000	21898000	60186000	9	0.364724	0.123473	P62899;B2R4C1;H7C2W9;C9JU56;B7Z4E3;B7Z4C8;B8ZZK4;Q76N53	P62899;B2R4C1;H7C2W9;C9JU56;B7Z4E3;B7Z4C8;B8ZZK4	60S ribosomal protein L31	RPL31
27.3881	27.3179	27.5785	27.4568	27.3002	27.1587	5440600	4845600	5709000	1821400	1107500	746390	12	0.456837	0.122948	B4DLS8;Q53GV6;O43395;B2R791;B4DM28	B4DLS8;Q53GV6;O43395;B2R791;B4DM28	U4/U6 small nuclear ribonucleoprotein Prp3	PRPF3
27.5339	27.9001	28.0348	27.5159	27.8833	27.703	25697000	23980000	22868000	8774400	8564100	7339100	6	0.266139	0.122187	Q13243;A0A024R6D8;Q59EK7;B4DJK0;B4DUA4;Q86U32;G3V5K8;B5BUD8	Q13243;A0A024R6D8;Q59EK7	Serine/arginine-rich splicing factor 5	SRSF5
30.2995	29.2229	29.2849	29.7523	29.5757	29.1136	92925000	17563000	21675000	16698000	8642400	7190500	4	0.111045	0.121925	P68366;C9JEV8;C9JQ00;C9JJQ8;C9JDL2	P68366	Tubulin alpha-4A chain	TUBA4A
25.6804	26.1363	26.318	25.8671	26.3542	25.5491	4979300	4199300	6165200	543880	996720	371990	8	0.150292	0.121456	Q9ULW3;A0A024R029	Q9ULW3;A0A024R029	Activator of basal transcription 1	ABT1
33.5701	33.8709	33.9616	33.7505	33.7304	33.5617	305500000	239540000	431270000	122020000	89846000	84754000	63	0.38005	0.11994	Q9NR30;Q3SWU7;Q8NI92	Q9NR30	Nucleolar RNA helicase 2	DDX21
32.3088	32.8735	32.8757	32.4717	32.6528	32.5761	374020000	396230000	447810000	155720000	134060000	144020000	3	0.239861	0.119152	G3V4W0;B4DY08;B2R5W2;G3V4C1;B3KX96;G3V2D6;G3V251;G3V5X6;G3V3K6	G3V4W0;B4DY08;B2R5W2;G3V4C1;B3KX96;G3V2D6		HNRNPC
27.3941	27.6688	27.9288	27.5478	27.6508	27.4358	11380000	11163000	14084000	4396800	4114500	2540000	11	0.289243	0.119069	Q9NZM5;Q53YP0;B4E1N4;B4DND9;Q7L4X7;Q96CS0;B4DVK1;B4E013;M0QX73;M0QZ34;M0QZU5;M0QYZ9;Q9P0B0;Q9H7J4	Q9NZM5;Q53YP0;B4E1N4;B4DND9;Q7L4X7;Q96CS0;B4DVK1;B4E013	Glioma tumor suppressor candidate region gene 2 protein	GLTSCR2
28.2087	28.6191	28.8807	28.2684	28.5087	28.5757	7341800	7176000	10049000	2750000	1960400	2384700	22	0.212281	0.11856	B3KY11;Q9BUQ8;A0A024R0Z3;A8KA56;H0YI52;F8VVA2	B3KY11;Q9BUQ8;A0A024R0Z3;A8KA56	Probable ATP-dependent RNA helicase DDX23	DDX23
25.7538	25.7512	25.7755	25.8715	25.223	25.8373	3631700	1198200	1669600	736820	223700	404240	7	0.214115	0.116236	Q5JVF3;A8K097;A0A024RE04;A0A024RDZ9	Q5JVF3;A8K097;A0A024RE04;A0A024RDZ9	PCI domain-containing protein 2	PCID2
26.8226	27.2828	27.2197	26.962	26.7218	27.3046	2494500	3621500	5011800	1447500	802110	1727400	11	0.193805	0.112201	G3V1S6;Q10471;A0A1L7NY50;A0A1L7NY41;B7Z6K2;B7Z462	G3V1S6;Q10471;A0A1L7NY50;A0A1L7NY41;B7Z6K2	Polypeptide N-acetylgalactosaminyltransferase 2;Polypeptide N-acetylgalactosaminyltransferase 2 soluble form	GALNT2
28.2154	28.377	28.4103	28.1536	28.2866	28.2261	15547000	10570000	13390000	5172600	4056600	4390200	12	0.717882	0.112115	P31689;B7Z5C0;Q9NXZ8	P31689;B7Z5C0	DnaJ homolog subfamily A member 1	DNAJA1
27.6812	25.9287	26.1459	26.3741	26.2316	26.8164	10493000	1732800	2563000	1343500	726950	1394300	10	0.0670305	0.111257	P60842;A8K7F6;A8K088;J3KT12;J3QL43;Q59F68;J3QS69;J3QR64;B4DNH2;J3KTB5;E7EQG2;Q14240;J3QKZ9;J3QLN6;B4E047;J3KS25;J3KSZ0;Q9NZE6;J3QL52;J3KS93;J3KSN7;J3KTN0;B4E102;Q96B07;B4DKP9;B4DJX6;J3KT04;E7EMV8;Q86WD0;D3DSD6	P60842;A8K7F6;A8K088;J3KT12;J3QL43;Q59F68;J3QS69;J3QR64;B4DNH2;J3KTB5;E7EQG2;Q14240	Eukaryotic initiation factor 4A-I;Eukaryotic initiation factor 4A-II	EIF4A1;EIF4A2
25.4672	24.8843	24.7655	24.7237	25.1062	24.9546	2693300	1149300	914960	497140	420130	457440	7	0.172154	0.11086	E9PKG1;Q5U8W9;Q99873;H7C2I1;E9PIX6;B4DJ87;E9PQ98;E9PNR9;H0YDE4;A0A087X1W2	E9PKG1;Q5U8W9;Q99873;H7C2I1;E9PIX6;B4DJ87;E9PQ98	Protein arginine N-methyltransferase 1	PRMT1;HRMT1L2
23.7924	23.7768	23.9596	24.0813	23.9636	23.1553	201470	198650	235870	104820	57837	17603	3	0.136176	0.109539	Q6P2E9;B7Z7V8	Q6P2E9;B7Z7V8	Enhancer of mRNA-decapping protein 4	EDC4
27.7672	27.0828	27.4856	27.5299	27.5539	26.9247	6277900	2132200	3762500	1120600	1095300	556670	21	0.14121	0.109042	Q9Y446;E9PKC4;E9PQ15;E9PRW6;E9PK71;E9PJR7;H0YEY5	Q9Y446	Plakophilin-3	PKP3
25.9939	25.6937	25.7322	25.8788	25.5242	25.6995	4097100	1783300	2357200	1030500	600710	632000	6	0.310119	0.105761	Q2I0Y7;E7EU96;Q8NEV1;P68400;B5BUH5;Q5U5J2;B2R6D7;V9GYA2;V9GY80;A0A087WY74	Q2I0Y7;E7EU96;Q8NEV1;P68400;B5BUH5;Q5U5J2;B2R6D7	Casein kinase II subunit alpha 3;Casein kinase II subunit alpha	CSNK2A1;CSNK2A3
28.7386	29.1855	29.145	29.0278	29.0525	28.6817	9653200	10884000	11518000	3960300	2954100	2130500	31	0.213354	0.102356	Q8IX01;A8K5G0;A0A024R7K0;M0R2Z9;M0R3F6;B4DSQ4;M0R065;M0R216;M0R2Y3	Q8IX01;A8K5G0;A0A024R7K0;M0R2Z9;M0R3F6	SURP and G-patch domain-containing protein 2	SUGP2
27.6362	27.943	28.0734	27.5625	27.9025	27.8816	16139000	13472000	18118000	4411200	4694300	4115900	9	0.235858	0.101971	Q9NQZ2	Q9NQZ2	Something about silencing protein 10	UTP3
26.1479	24.7062	24.7487	24.8024	25.0046	25.4908	1551500	349710	396600	148660	128910	325740	8	0.068858	0.101652	B2R5U1;B3KU67;Q7KZF4;A0A140VK49;Q59FF0;B4E299;I6TRR8;H7C597	B2R5U1;B3KU67;Q7KZF4;A0A140VK49;Q59FF0;B4E299;I6TRR8	Staphylococcal nuclease domain-containing protein 1	SND1
25.1201	25.5836	25.317	25.3013	25.2117	25.2105	4193400	3113600	3891000	1386400	718480	1007300	5	0.291247	0.0990829	F8W0J4;O95619;F8W1B9	F8W0J4;O95619	YEATS domain-containing protein 4	YEATS4
30.9275	31.3043	31.4834	30.973	31.2645	31.1808	68897000	56666000	70395000	19862000	19185000	19788000	22	0.206454	0.0989666	O43390;Q0VGD6;B2R7W4;B4DMB1;Q6MZS5;B4DT28;B4DMD1;Q7Z334	O43390;Q0VGD6;B2R7W4;B4DMB1;Q6MZS5;B4DT28;B4DMD1	Heterogeneous nuclear ribonucleoprotein R	HNRNPR;HNRPR;DKFZp686A13234
31.7604	31.6667	31.5144	31.6301	31.6977	31.3179	108150000	79589000	70249000	31386000	22542000	23688000	2	0.290667	0.0985972	Q16666	Q16666	Gamma-interferon-inducible protein 16	IFI16
23.9462	24.5054	24.3502	24.2363	24.1528	24.1171	1028400	1141100	1044900	425990	291590	305640	2	0.226217	0.0985406	Q9BVV7;A8K1K8;J3QRI1	Q9BVV7;A8K1K8;J3QRI1	Mitochondrial import inner membrane translocase subunit Tim21	TIMM21;C18orf55
28.4156	28.7748	28.6716	28.5974	28.3798	28.5903	24138000	23925000	24277000	9238800	6471800	6894600	12	0.312327	0.0981871	Q9Y3A4;Q9NSQ0;A0A024R4U1	Q9Y3A4	Ribosomal RNA-processing protein 7 homolog A	RRP7A
24.0527	24.2648	23.944	23.5976	23.4159	24.958	226980	286060	217210	21274	0	0	5	0.0681197	0.0966886	A0A0J9YX88;E9PJ24;B7ZM65;F8WEF5;B7ZM66;A0A0J9YYB5;A0A0J9YWD5;Q9P1Y6;A0A024RCA1	A0A0J9YX88;E9PJ24;B7ZM65;F8WEF5;B7ZM66;A0A0J9YYB5;A0A0J9YWD5;Q9P1Y6;A0A024RCA1	PHD and RING finger domain-containing protein 1	PHRF1
26.8268	27.0444	26.807	26.7755	26.8173	26.7958	5029900	4596900	4173000	1878700	743830	1213200	4	0.555455	0.0965099	P07947;B2RA70;J3QRU1;Q9H7V3;P12931;Q9P134;B3KUV3;Q5TGY6;A0A0S2Z3Y4;B7Z6W7;P06239;A0A0S2Z3Y8;Q573B4;P09769;B4DZS7;A0A0S2Z3T3	P07947;B2RA70;J3QRU1	Tyrosine-protein kinase Yes	YES1
28.512	28.9333	29.0165	28.8651	28.671	28.64	7311200	7129500	9472200	2917900	2569800	1915100	27	0.216202	0.0952473	Q99575;Q96F88;E5RK39	Q99575;Q96F88	Ribonucleases P/MRP protein subunit POP1	POP1
23.0186	23.4998	23.6239	22.955	23.5566	23.3451	242580	320590	289620	0	82768	0	4	0.137855	0.0952015	B3KMI0;B3KN45;Q9P2I0;A0A024R6H0;H0YJF4	B3KMI0;B3KN45;Q9P2I0;A0A024R6H0;H0YJF4	Cleavage and polyadenylation specificity factor subunit 2	CPSF2
28.1961	27.9463	28.3357	27.9413	28.0373	28.2142	1376100	788730	1246700	393450	225710	216200	42	0.274284	0.0951138	Q14204;B4DSR6;H0YJ21;Q92862;Q9NRC3;Q6P2H7	Q14204	Cytoplasmic dynein 1 heavy chain 1	DYNC1H1
26.8157	27.0075	27.2644	26.9112	26.8276	27.0648	2192800	2061100	2797600	548910	975110	768000	11	0.255206	0.0946534	Q13619;B2RBV7;A0A0A0MR50;B4DKT2;A0A087WWN2	Q13619;B2RBV7;A0A0A0MR50	Cullin-4A	CUL4A
27.8457	27.0992	27.3437	26.8168	26.5446	28.6433	3216200	8239700	8362300	2451600	115510	2713900	8	0.0466144	0.0946166	B4DUR8;B3KX11;Q2TU64;P49368;Q59H77;Q5SZX6;E9PQ35;E9PRC8	B4DUR8;B3KX11;Q2TU64;P49368;Q59H77	T-complex protein 1 subunit gamma	CCT3
24.3741	24.5011	24.7507	24.7709	24.7978	23.7771	627390	645180	869110	381550	254200	267670	4	0.0942837	0.0933323	Q8N7H5;A0A024R0H6;B4DGJ5	Q8N7H5;A0A024R0H6;B4DGJ5	RNA polymerase II-associated factor 1 homolog	PAF1
23.569	24.1719	24.1899	23.7781	23.2448	24.6366	499460	534290	518130	171450	53392	69549	3	0.0696499	0.0904115	B7Z4H7;B7Z4N7;Q8IWW9;A0A024RA10;Q8IXQ5;A8K364;H7C259;B7Z3P9;B7Z4J1	B7Z4H7;B7Z4N7;Q8IWW9;A0A024RA10;Q8IXQ5;A8K364	Kelch-like protein 7	KLHL7
29.5752	29.7466	29.8986	29.7903	29.5819	29.5828	20333000	15520000	20497000	9054700	5412800	7621800	24	0.310481	0.0884927	P11387;B9EG90;Q9BVT2;Q6PK95;Q6NWZ5;D3DWJ7;E5RIC7;B7Z9E8;B4DYD2;Q969P6;E5KMK7;E5KMK6;E5KMK5;E5RJ33;H0YBR3;H0YC03;E5RGE7;E5RGR4;E5RFE3;E5RGR2;E5RJ95;E5RFS0;B4E061	P11387;B9EG90	DNA topoisomerase 1	TOP1
28.8057	29.1479	29.0498	28.9575	28.9615	28.8193	9286600	7402200	8036600	3175600	1712700	1934200	33	0.324115	0.0883484	Q76FK4;A0A024R250;F8WE42;F5H101;B4DM91;Q6AI50;A6H8Z4;F5GWN9;A0A0A0MSJ1;F5H8B8;F5H797;F5H692;F5H7D5;F5H532;F5H0I5;F5GXV1;Q7Z607	Q76FK4;A0A024R250;F8WE42;F5H101;B4DM91;Q6AI50;A6H8Z4;F5GWN9	Nucleolar protein 8	NOL8;DKFZp686P12242
30.7948	31.1555	31.2663	30.888	31.098	30.9675	43848000	36735000	46984000	15394000	12816000	13031000	34	0.220772	0.0877387	Q12788;J3KNP2;A0JLS5;A0A087WYP7;H3BN88	Q12788;J3KNP2;A0JLS5	Transducin beta-like protein 3	TBL3
27.7243	28.2606	28.1011	27.9575	28.1955	27.6723	8614100	10556000	11982000	4068200	2429800	2074300	12	0.147326	0.086902	Q96SK2;A0A140VJX5;C9J5K4;C9JYX1	Q96SK2;A0A140VJX5	Transmembrane protein 209	TMEM209
29.1508	28.5128	28.6405	28.5801	28.8554	28.6086	66976000	30499000	33760000	19301000	12665000	13751000	8	0.151363	0.0866636	F8W1R7;P60660;G3V1V0;J3KND3;G8JLA2;B7Z6Z4;G3V1Y7;F8VPF3;Q6IBG5;F8VZU9;F8W180;H0YI43;F8W1I5;P14649;A0A024RB31;B4E368;F8VXL3	F8W1R7;P60660;G3V1V0;J3KND3;G8JLA2;B7Z6Z4;G3V1Y7;F8VPF3;Q6IBG5;F8VZU9;F8W180	Myosin light polypeptide 6	MYL6
29.2934	29.5577	29.7484	29.5371	29.3843	29.4201	67856000	61569000	80152000	25472000	15076000	19251000	10	0.243059	0.0860316	P62906;Q1JQ76;A0A024RCW3	P62906;Q1JQ76;A0A024RCW3	60S ribosomal protein L10a;Ribosomal protein	RPL10A
29.628	28.1436	28.3464	28.2725	28.3764	29.2139	18383000	4795700	6151600	2439300	1872700	4097900	24	0.0530748	0.08509	P13639;Q8TA90;B4DPU3;Q6PK56;B4DRE8;Q6W6M8;B4DMC6	P13639;Q8TA90;B4DPU3	Elongation factor 2	EEF2
29.4285	29.8734	29.7802	29.2495	29.6992	29.8799	123520000	107130000	123410000	38051000	42271000	45971000	10	0.134691	0.0844892	J3QR09;J3KTE4;P84098;Q53G49;Q8IWR8;J3QL15	J3QR09;J3KTE4;P84098;Q53G49;Q8IWR8	Ribosomal protein L19;60S ribosomal protein L19	RPL19
24.0619	24.4747	24.8825	24.6132	24.3431	24.2107	1860000	1523300	2440300	369630	442390	465570	3	0.115267	0.0840327	A0A024R248;Q96LW7	A0A024R248;Q96LW7	Bcl10-interacting CARD protein	C9orf89
27.9089	28.3731	28.4512	27.9925	28.2016	28.2919	104870000	105400000	103710000	27237000	17122000	26841000	6	0.162033	0.082372	Q9Y3U8;J3QSB5;J3KTD3	Q9Y3U8;J3QSB5	60S ribosomal protein L36	RPL36
29.4868	29.912	29.7139	29.7505	29.64	29.4822	211830000	196270000	184870000	90808000	39541000	60435000	3	0.213528	0.0799929	P42677;Q5T4L4;A4D1G5;C9J1C5	P42677;Q5T4L4	40S ribosomal protein S27	RPS27
27.7778	26.9325	27.2365	27.0714	27.0665	27.5722	24581000	11076000	14780000	5566600	4036500	5877200	7	0.0943422	0.0789026	P59998;F8WCF6;F8WDD7;A0A0A6YYG9;Q9H7Z5;H7C0A3;F8WE39;F8WDW3;R4GN08	P59998;F8WCF6;F8WDD7;A0A0A6YYG9;Q9H7Z5;H7C0A3	Actin-related protein 2/3 complex subunit 4	ARPC4;ARPC4-TTLL3
23.5043	23.6079	23.7467	23.151	23.0681	24.4074	2720400	1092500	2726800	0	613270	1320300	3	0.061248	0.0774778	Q6IBA2;P53999;Q59G24;Q6E433;B7Z1Z0	Q6IBA2;P53999;Q59G24;Q6E433;B7Z1Z0	Activated RNA polymerase II transcriptional coactivator p15	PC4;SUB1
33.2229	33.4862	33.8479	33.3513	33.5244	33.4491	183930000	149980000	213640000	59820000	50015000	53356000	68	0.153887	0.0773989	Q08211;Q58F26;Q6PJK6;B3KU66	Q08211;Q58F26	ATP-dependent RNA helicase A	DHX9
28.2166	29.0305	29.3763	28.8287	28.3168	29.248	33658000	44749000	66406000	17929000	8323500	19198000	1	0.0608606	0.0766163	Q96A72;A0A023T6R1;F5H6N1;F5H6P7;F5H3U9;F5H124	Q96A72;A0A023T6R1;F5H6N1;F5H6P7	Protein mago nashi homolog 2	MAGOHB
25.0548	25.1663	25.1671	24.9827	24.8813	25.3002	3676200	2606900	3136500	1110700	711840	1226300	2	0.221451	0.0746956	Q9NRW3;M4VP52;Q59GY0;A0A087WX48;Q8IUX4;M4VR43;F2YHL7	Q9NRW3;M4VP52;Q59GY0	DNA dC->dU-editing enzyme APOBEC-3C	APOBEC3C
25.3018	25.5894	25.6399	25.4658	25.1294	25.7181	1563400	1280500	1606100	579990	104720	384720	6	0.133465	0.0726178	Q9NUQ6;A0A024R3V0;B8ZZZ7;Q4ZFW0;F8WAV0;C9IZC3;C9J8M7;F2Z2S1;C9JKE4;F8VZ02;F8VT91;C9JGM8;F8W6C2	Q9NUQ6;A0A024R3V0;B8ZZZ7	SPATS2-like protein	SPATS2L
24.561	23.4827	24.3378	23.9762	22.5945	25.5933	703240	202810	518970	0	0	360490	4	0.0262274	0.0725091	Q8N9C4;A0A024R1Y2;P53396;A0A024R1T9;Q4LE36	Q8N9C4;A0A024R1Y2;P53396;A0A024R1T9;Q4LE36	ATP-citrate synthase	ACLY;ACLY variant protein
28.8813	29.1915	29.387	29.4569	28.9741	28.8131	11829000	11254000	14223000	6813200	3162100	2921300	22	0.106755	0.0719248	P56192;A8K492;B4E0E9;B4DF61;H0YHV5;A0A024RBA2;H0YIC2;H0YIP0;H0YI94;F8VPL7;F8VS26;H0YHL6;F8W0M7;F8W0S4;F8VZZ9;H0YI27;Q8NAB3;F5H2V6	P56192;A8K492;B4E0E9;B4DF61	Methionine--tRNA ligase, cytoplasmic	MARS
31.0034	30.359	30.3298	30.5451	30.508	30.4321	95948000	62410000	86438000	25907000	18287000	19507000	1	0.112519	0.0690155	Q8N6N5;Q8IZ29;P68371;Q8IWP6;B3KML9;Q96HX0;A6NNZ2;B4DNW1;A4UCT2;Q9H4B7;CON__ENSEMBL:ENSBTAP00000025008;Q6P602	Q8N6N5;Q8IZ29;P68371;Q8IWP6;B3KML9;Q96HX0	Tubulin beta-4B chain	TUBB2C;TUBB4B
25.4465	25.5503	25.5321	25.579	25.6269	25.1274	869050	801950	1719000	757410	348750	0	8	0.149774	0.0652307	O43663;A0A024RC67;H0YM42;B4E238;H0YL53;G3V3N7;H0YLA0	O43663;A0A024RC67	Protein regulator of cytokinesis 1	PRC1
28.4969	28.6726	28.6059	28.7533	28.4439	28.3882	25337000	21967000	24595000	12598000	2992900	6826300	8	0.195247	0.0633341	P08754	P08754	Guanine nucleotide-binding protein G(k) subunit alpha	GNAI3
26.6321	27.1539	27.4297	26.823	26.8932	27.3122	2767200	2562600	4481300	1157000	1151100	1869800	12	0.0788736	0.0624917	Q99567;B7Z5I6;B4DP20;J3KMX1;I3L245;I3L4K7;I3L2W3	Q99567;B7Z5I6;B4DP20;J3KMX1	Nuclear pore complex protein Nup88	NUP88
30.0779	30.3105	30.4498	30.2583	30.3362	30.0587	75015000	61240000	77831000	28992000	20219000	17839000	23	0.171012	0.0616843	Q96DI7;A0MNP2;B2R9I9;Q9NSS8	Q96DI7;A0MNP2;B2R9I9	U5 small nuclear ribonucleoprotein 40 kDa protein	SNRNP40;WDR57
28.1281	28.4491	28.5192	28.3126	28.3509	28.2556	5370900	5139200	6037800	2001900	1325600	1340400	24	0.182077	0.0590725	Q7Z2W4;A8K9U6;C9J6P4;Q05DV5;H7C5K1	Q7Z2W4;A8K9U6;C9J6P4;Q05DV5	Zinc finger CCCH-type antiviral protein 1	ZC3HAV1
29.0365	28.9025	29.3138	29.2801	28.9422	28.8544	33690000	20789000	31839000	12334000	7180700	7749600	10	0.1206	0.0586821	Q8NCF7;B2RE88;A0A024RBE8;F8VVM2;Q53HC3;Q00325;A0A024RBH9;F8VWQ0;F8VZL5;F8VWR4;Q6MZF9;F8VY00;F8VYH5	Q8NCF7;B2RE88;A0A024RBE8;F8VVM2;Q53HC3;Q00325;A0A024RBH9;F8VWQ0	Phosphate carrier protein, mitochondrial	SLC25A3
27.3212	27.1102	27.948	27.3074	27.4528	27.4504	97331000	53519000	107760000	29777000	21649000	25032000	3	0.0773631	0.0562878	Q49AN9;F5H013;P62308;A8MWD9;C9JVQ0	Q49AN9;F5H013;P62308;A8MWD9	Small nuclear ribonucleoprotein G;Small nuclear ribonucleoprotein G-like protein	SNRPG
23.7952	23.9873	23.994	23.7147	23.9316	23.9655	137880	219480	242870	34420	0	14083	5	0.208079	0.0548782	B3KY03;Q15021;B3KMS0;B4E0B7;E7EN77;Q6ZV00	B3KY03;Q15021;B3KMS0;B4E0B7	Condensin complex subunit 1	NCAPD2
25.1783	25.4297	25.3352	25.3923	25.3887	24.9979	4674600	4483200	3627100	997090	1086900	588180	5	0.134446	0.054718	Q9Y6G0;A0A1W2PP04;Q9Y388;Q05DU0;Q0VGM7	Q9Y6G0;A0A1W2PP04;Q9Y388;Q05DU0;Q0VGM7	RNA-binding motif protein, X-linked 2	RBMX2
28.0108	27.2859	27.2433	27.4457	27.498	27.4337	19732000	4617700	6212900	3144600	1303800	1853300	16	0.0762993	0.0541935	P61158;A0A024RAI1;B4DXW1;Q59FV6;B4DTI0;B4DT29;B4E1U3;Q59GD5;B7Z9W3;Q9P1U1;F8WEW2;F8WE84;F8WDR7;B3KM55;A0A0A0MTI9;H7C4J1;Q9C0K3;C9IZN3	P61158;A0A024RAI1;B4DXW1;Q59FV6;B4DTI0;B4DT29	Actin-related protein 3	ACTR3
28.2837	28.6263	28.7492	28.5196	28.5938	28.3838	7293200	6989100	7757700	2875200	2018700	1376500	23	0.130365	0.054004	Q71SV8;Q9HCS7;Q68CN2	Q71SV8;Q9HCS7;Q68CN2	Pre-mRNA-splicing factor SYF1	XAB2;DKFZp762C1015
27.5558	26.8541	27.0084	26.9835	26.835	27.4398	10488000	3322500	4189500	1733300	1341900	1826000	8	0.0663994	0.0533447	Q53YD7;P26641;B4DUP0;Q2F838;B4DSR4;B4DUK7;Q2F840	Q53YD7;P26641;B4DUP0	Elongation factor 1-gamma	EEF1G
28.2746	28.6937	28.9055	28.5835	28.6241	28.5081	10056000	9595800	12689000	3779000	2871600	2491200	20	0.100383	0.0526956	Q8N8A6;F1T0L5	Q8N8A6;F1T0L5	ATP-dependent RNA helicase DDX51	DDX51
26.0414	26.4102	26.3706	26.1143	26.0478	26.512	1117900	1253200	1194100	297260	188060	260610	10	0.0947424	0.0493685	B7Z5S1;Q9NTI5;A9IYQ1	B7Z5S1;Q9NTI5	Sister chromatid cohesion protein PDS5 homolog B	PDS5B
28.5255	28.4369	28.8185	28.432	28.5905	28.6142	12427000	7988000	13300000	4502700	2826600	3134500	22	0.138079	0.0480874	P12956;A0A024R1N4;B1AHC9;B2RDN9;B4DE32;B4E356;Q6IC76	P12956;A0A024R1N4;B1AHC9;B2RDN9;B4DE32;B4E356	X-ray repair cross-complementing protein 6	XRCC6
24.4027	24.5774	24.7744	24.7762	24.7973	24.0408	265780	428790	587570	142760	118330	35369	5	0.0597647	0.0467262	Q59GQ7;A0A0C4DGA6;Q14527;A8K5B6;H7C5K0;Q05DF7;Q05DQ5;Q05BZ6	Q59GQ7;A0A0C4DGA6;Q14527;A8K5B6	Helicase-like transcription factor	HLTF
29.2688	29.3548	29.2551	29.3655	29.006	29.3699	48834000	37620000	38480000	17168000	10794000	11885000	3	0.135453	0.0457369	Q9Y6C9;Q53G34;B4DHQ0	Q9Y6C9;Q53G34	Mitochondrial carrier homolog 2	MTCH2
27.123	27.5121	27.6256	27.28	27.4084	27.4369	2305600	2083200	3027500	714660	441570	686420	21	0.101501	0.0451018	E9PD53;B3KXX5;Q9NTJ3;B3KVJ5;Q6P169;C9JR83;Q6NSG3;Q58F29;C9J9E4;C9JWF0;C9IYK2;C9JJ64;C9JVD8;C9J578	E9PD53;B3KXX5;Q9NTJ3;B3KVJ5	Structural maintenance of chromosomes protein;Structural maintenance of chromosomes protein 4	SMC4
25.6763	25.6356	25.7604	25.5551	25.8502	25.5318	6524200	4357000	3232600	990960	838500	527030	4	0.154961	0.0450986	A8KA83;Q9P0L0;J3QKM9;Q59EZ6;A0A024RC64	A8KA83;Q9P0L0	Vesicle-associated membrane protein-associated protein A	VAPA
26.9272	27.3961	27.2646	27.1659	27.1352	27.1547	1327200	2904800	1568800	534470	340860	299420	12	0.114327	0.0440782	B7ZLC9;Q8TEQ6;Q58EZ8	B7ZLC9;Q8TEQ6	Gem-associated protein 5	GEMIN5
26.4367	25.9566	25.6859	25.8935	26.3547	25.6995	12329000	5824800	5470800	1796500	2216300	1809100	7	0.0514291	0.0438582	P62269;A0A0G2JQH2;Q5GGW2;J3JS69	P62269	40S ribosomal protein S18	RPS18
25.4834	25.5483	25.5818	25.4926	25.6638	25.3267	1597000	911890	1314000	505590	256750	295960	7	0.160781	0.0434615	Q96RR1;E5KSY5;Q9H6V3;B4DLM7	Q96RR1;E5KSY5;Q9H6V3	Twinkle protein, mitochondrial	PEO1;C10orf2
29.9604	30.1082	30.0648	29.9662	30.1865	29.8532	13411000	10785000	12103000	6093400	4477600	3148900	34	0.147573	0.0425262	P52948;H7C3P6;A0A024RCC4;A8KA17;B4DWF8;H0YDF4;A0A1D8GZ64;A0A142I7X2;H0YCT1;H0YDA1	P52948;H7C3P6;A0A024RCC4	Nuclear pore complex protein Nup98-Nup96;Nuclear pore complex protein Nup98;Nuclear pore complex protein Nup96	NUP98
26.4198	26.2036	26.5776	26.2731	26.3462	26.4544	5275000	3508000	1867400	1200900	1156600	1301200	8	0.12927	0.0424309	Q6IT96;Q13547;B5BU61;Q5TEE2;B4DSK9;B4DRG0;B7Z3S4;Q5HYD4;E7ESJ6	Q6IT96;Q13547;B5BU61;Q5TEE2;B4DSK9;B4DRG0	Histone deacetylase;Histone deacetylase 1	HDAC1
28.2178	28.4352	28.2864	28.4901	28.3274	27.9984	13023000	11091000	11179000	5470300	3543600	2016100	23	0.092937	0.0412165	Q5ST80;O75955;Q53HQ0;Q6IB58;A0A140T9R1;A2AB10;A0A140T9X0;A2AB09;A2AB12;A2VCL5;A0A140T959;A0A140T9C3;A2AB13;A0A0G2JJQ6;A2AB11;A0A140T9W4;A0A140T9B1;A0A140T957;A0A140T910;A0A140T905;A2ABJ5;A0A140T907;A0A140T974	Q5ST80;O75955;Q53HQ0;Q6IB58;A0A140T9R1;A2AB10;A0A140T9X0;A2AB09;A2AB12;A2VCL5;A0A140T959	Flotillin-1	FLOT1
26.0066	26.5608	26.7767	26.2988	26.4093	26.5162	3433500	6212600	7695700	2233200	1651500	1288700	5	0.0580952	0.0399284	O43809;B2R6U8;A0A024R6W2;Q5HYH5;H3BND3	O43809;B2R6U8;A0A024R6W2;Q5HYH5	Cleavage and polyadenylation specificity factor subunit 5	NUDT21;DKFZp313O211
25.8556	26.1834	25.9039	26.1501	25.7216	25.9521	1131400	1375400	1427000	632040	217050	410490	9	0.0879064	0.0397116	Q58F09;Q13724;A8K9K4;C9J8D4;B8ZZE2	Q58F09;Q13724;A8K9K4	Mannosyl-oligosaccharide glucosidase	GCS1;MOGS
27.1938	27.6727	27.4554	27.808	27.3301	27.0692	6905300	5962600	11774000	3275700	2052700	1340700	8	0.0510616	0.0381616	Q9H9L3	Q9H9L3	Interferon-stimulated 20 kDa exonuclease-like 2	ISG20L2
28.3369	28.3652	27.8832	28.2067	28.2265	28.0417	27994000	7517500	7300900	3573800	2495600	2698100	8	0.0777535	0.0368245	Q9BTT5;Q16795;A8K4V2;F5H0J3;F5GY40	Q9BTT5;Q16795;A8K4V2	NADH dehydrogenase [ubiquinone] 1 alpha subcomplex subunit 9, mitochondrial	NDUFA9
27.2385	27.5503	27.6058	27.473	27.6262	27.1865	6616900	5345700	6584000	1750700	1526500	1389000	16	0.0740244	0.0363261	O00425;F8WD15;B4DKT5;Q9Y6M1;F8W930	O00425	Insulin-like growth factor 2 mRNA-binding protein 3	IGF2BP3
24.0175	23.9967	24.1279	24.4553	24.276	23.3035	163290	153880	144850	66072	50228	0	4	0.0335691	0.0357901	A0A0D9SFK2;A0A024QZ63;Q92614;B4E0T8;B4DYM1;B4DZ32	A0A0D9SFK2;A0A024QZ63;Q92614;B4E0T8;B4DYM1	Unconventional myosin-XVIIIa	MYO18A
24.3471	24.9237	24.57	24.5462	24.5659	24.6223	844990	1062300	624520	191100	216160	168620	6	0.0734252	0.0354614	Q8WV44;Q9NT12;Q658W3;H0Y9T3;D6REK2;H0YAD6;Q8TES0	Q8WV44;Q9NT12;Q658W3;H0Y9T3;D6REK2	E3 ubiquitin-protein ligase TRIM41	TRIM41;DKFZp434N1710;DKFZp666N1710
26.8454	27.1164	27.3212	27.0213	27.0572	27.0994	14018000	13123000	15829000	6278300	4132600	2413900	6	0.0893265	0.0350653	Q9Y3B2;R4GNH9;R4GMQ7;B1AMU7;B1AMU3;B1AMU4	Q9Y3B2;R4GNH9;R4GMQ7;B1AMU7;B1AMU3;B1AMU4	Exosome complex component CSL4	EXOSC1
31.2375	29.7084	29.7489	30.2344	30.2606	30.0996	115320000	32223000	43271000	21855000	16975000	18326000	5	0.0220425	0.0333875	Q6IPT9;Q6IPS9;Q6IPN6;Q5VTE0;Q53HQ7;Q53HM9;P68104;Q53HR5;Q53GA1;A8K9C4;A0A087WVQ9;Q53GE9;Q53G85;A0A087WV01;Q9H2I7;B4DNE0;Q96RE1;Q53G89;B4DV42;Q53HR1;Q9NZS6;Q05639;Q504Z0;A9X7H1;B4E2C5;Q5JR01;Q96C29;Q8TBL1;Q6P082;Q96CD8;Q6P4C9;A6PW80;Q59GP5;Q6NSH7;Q6NS35;Q2F837;Q96EB3;Q14222	Q6IPT9;Q6IPS9;Q6IPN6;Q5VTE0;Q53HQ7;Q53HM9;P68104;Q53HR5;Q53GA1;A8K9C4;A0A087WVQ9;Q53GE9;Q53G85;A0A087WV01;Q9H2I7;B4DNE0;Q96RE1;Q53G89;B4DV42;Q53HR1;Q9NZS6;Q05639;Q504Z0	Elongation factor 1-alpha;Putative elongation factor 1-alpha-like 3;Elongation factor 1-alpha 1;Elongation factor 1-alpha 2	EEF1A1;EEF1A1P5;EEF1A1L14;EEF1A2
25.1603	25.3443	25.7578	25.5773	25.5093	25.0822	1324900	1405000	1902700	482530	304440	296750	11	0.0453836	0.0312023	C9IYN3;A8K894;Q8WVV9;D6W592;A0A0S2Z6K1;B7WPG3;A0A0S2Z5U3;A0A0S2Z610;H7BXH8;C9JJZ7;H7C464	C9IYN3;A8K894;Q8WVV9;D6W592;A0A0S2Z6K1;B7WPG3;A0A0S2Z5U3;A0A0S2Z610	Heterogeneous nuclear ribonucleoprotein L-like	HNRPLL;HNRNPLL
30.3205	30.5625	30.1439	31.0049	30.25	29.6872	26383000	21333000	17746000	13455000	6019000	3837200	8	0.0235686	0.0282389	F5H6E2;B7Z3E5;O00159;B7Z9C0;I3L204;A1L180;I3L501;I3L4D4;I3L3Y6;I3L168;I3L3F5	F5H6E2;B7Z3E5;O00159;B7Z9C0	Unconventional myosin-Ic	MYO1C
25.5151	25.4637	25.0951	25.1877	25.433	25.3749	3635700	2442900	2267900	785600	888430	783010	5	0.0596447	0.0260951	Q96AG4	Q96AG4	Leucine-rich repeat-containing protein 59	LRRC59
24.1651	24.9081	24.7562	24.5431	24.8036	24.405	1344500	1847000	2364000	483550	189170	365490	5	0.034373	0.0259285	P23769;B7WNQ9;P15976;P23771	P23769	Endothelial transcription factor GATA-2	GATA2
27.7698	28.3295	28.4002	28.0713	28.3035	28.049	12084000	12120000	14551000	3457900	4171800	3610200	5	0.0398866	0.0252692	Q9GZS1;B4E005;B4DYB1	Q9GZS1;B4E005	DNA-directed RNA polymerase I subunit RPA49	POLR1E
26.5488	26.9993	26.7934	26.5074	27.095	26.6642	8509900	9432300	6237000	2443800	2602800	2092300	11	0.0387502	0.0249526	Q6PK04;I3L0U5;H6QX63;I3L4F6	Q6PK04;I3L0U5;H6QX63	Coiled-coil domain-containing protein 137	CCDC137
28.0077	28.1676	28.5781	27.9966	28.3487	28.3412	10935000	8540100	13117000	3829100	3391800	3193100	15	0.0367502	0.022316	Q2TAY7;A0MNN4	Q2TAY7;A0MNN4	WD40 repeat-containing protein SMU1	SMU1
27.969	28.0833	28.1495	28.0677	27.9902	28.0772	16086000	12343000	14043000	5450200	3644600	3842500	4	0.137875	0.0221945	Q9BWF3;A8K9U0;E9PB51;D6R9K7;J3QRR5	Q9BWF3;A8K9U0;E9PB51	RNA-binding protein 4	RBM4
23.94	23.5813	23.6412	23.7797	23.4227	23.8946	568790	324710	335470	171420	64810	114540	3	0.0412985	0.0218703	Q53X12;Q93050;Q5CZH6;K7EM24;K7EN36;K7EPG4;B7Z641;B7Z2A9;Q53ET5;K7EQW2;K7ELZ6;B7Z2J9	Q53X12;Q93050;Q5CZH6;K7EM24;K7EN36;K7EPG4;B7Z641;B7Z2A9;Q53ET5	V-type proton ATPase 116 kDa subunit a isoform 1	ATP6V0A1;DKFZp686N0561
24.7162	24.443	24.4608	24.7602	23.9669	24.8289	1489800	1140700	802740	303790	49025	281850	7	0.0245969	0.0213413	A0A0S2Z472;P13861;A8KAH7;A0A024R2W3;H7C1L0;B3KY43;Q6DHZ2;P31323;A0A024R712;H7C330;Q75MP1;O60380;C9J830;A0A0K0K1I3	A0A0S2Z472;P13861;A8KAH7;A0A024R2W3;H7C1L0	cAMP-dependent protein kinase type II-alpha regulatory subunit	PRKAR2A
25.6237	25.4515	25.3548	25.7166	25.1647	25.4855	7671400	5650400	4985800	3946200	1461200	2252000	1	0.0401456	0.0210501	Q3MIH3;P62987;J3QS39;J3QTR3;F5H6Q2;F5GYU3;F5H2Z3;F5H265;Q5UGI3;B4DV12;F5H388;F5H747;F5GXK7;J3QKN0;Q5U5U6;Q5PY61;P0CG47;Q9UFQ0;Q96C32;Q96MH4;L8B4I8;L8B196;Q96H31;L8B4R0;A8K674;P0CG48;L8B4Z6;L8B4M0;L8B4J3;Q66K58;Q59EM9;M0R1V7;Q49A90;M0R2S1;J3QSA3;F5GZ39;M0R1M6	Q3MIH3;P62987;J3QS39;J3QTR3;F5H6Q2;F5GYU3;F5H2Z3;F5H265;Q5UGI3;B4DV12;F5H388;F5H747;F5GXK7;J3QKN0;Q5U5U6;Q5PY61;P0CG47;Q9UFQ0;Q96C32;Q96MH4;L8B4I8;L8B196;Q96H31;L8B4R0;A8K674;P0CG48;L8B4Z6;L8B4M0;L8B4J3;Q66K58;Q59EM9;M0R1V7;Q49A90;M0R2S1;J3QSA3;F5GZ39;M0R1M6	Ubiquitin-60S ribosomal protein L40;Ubiquitin;60S ribosomal protein L40;Polyubiquitin-B;Ubiquitin;Polyubiquitin-C;Ubiquitin	UBA52;UBB;RPS27A;UBC;DKFZp434K0435;UbC
27.4149	27.4669	27.6462	27.6342	27.5284	27.3097	5656500	2779600	4307300	1567200	721180	729060	16	0.0541185	0.0186049	Q96H55;B4E218;A0A024R0S9;B7Z1T7;A0A087WZQ9;A0A087WU55;B4DSL5;A0A087WY49;A0A087WYT7	Q96H55;B4E218;A0A024R0S9	Unconventional myosin-XIX	MYO19
29.7573	30.2255	30.2757	29.9973	29.9723	30.2361	43371000	39429000	45225000	17587000	12241000	12639000	18	0.0321258	0.0176455	O43818	O43818	U3 small nucleolar RNA-interacting protein 2	RRP9
30.8069	31.1476	30.7458	30.8685	31.0469	30.7349	181350000	175160000	152410000	66756000	59025000	51762000	13	0.0366039	0.016667	P16401;Q14463	P16401	Histone H1.5	HIST1H1B
32.2814	32.1935	32.4516	32.2763	32.2984	32.3043	65530000	38716000	41238000	16371000	13462000	12298000	84	0.0728827	0.0158424	P35579;A0A024R1N1;A0A0U4BW16;Q86XU5;B4E3S1;Q6ZNL4;Q5BKV1;B1AH99;Q99529;A0A024QZJ6;P35749;A0A024QZJ4;B1PS43;Q9UMJ0;G1UI33;E7ERA5;Q7Z7R0;A8CLL2;Q2PS10;Q68D89;O14729;O14794;B4DFX9;B4DRV3;B4E0I9;REV__B4DQZ7;REV__S4R3H4;REV__E7EQT4;REV__Q9UKV3;Q59EV3;A5YM51;P12883;P13535;Q9UKX3;V9HWC1;Q9Y623;P13533;P12882;P11055;Q9UKX2;A7E2Y1;A0A087X0T3	P35579;A0A024R1N1;A0A0U4BW16;Q86XU5;B4E3S1	Myosin-9	MYH9
27.951	28.3662	28.5408	28.2921	28.3869	28.1346	10146000	9321900	11255000	4163200	2679500	3022700	14	0.0261001	0.0147756	A0A0F7L0Q8;P51114;A0A0F7L1S3;A0A0F7KYT8;B4DXZ6;E9PFF5;B4DM21;E7EU85;B4DGH9;B4DM78;C9JZE0;C9JY20;C9JAJ4;C9IZ22;C9JYQ6;A0A0F7L2Z7;C9J5B4	A0A0F7L0Q8;P51114;A0A0F7L1S3;A0A0F7KYT8;B4DXZ6;E9PFF5;B4DM21;E7EU85;B4DGH9;B4DM78	Fragile X mental retardation syndrome-related protein 1	FXR1
31.6886	32.3188	32.3953	32.1909	32.0686	32.099	315700000	324080000	418230000	152880000	102380000	121150000	17	0.021636	0.0147158	Q8N1H4;P62995;B2RDQ3;Q68DZ9;Q59GA1;H7BXF3;H7C2L4	Q8N1H4;P62995;B2RDQ3;Q68DZ9;Q59GA1;H7BXF3	Transformer-2 protein homolog beta	TRA2B;DKFZp686F18120
25.9379	26.3479	26.2101	26.2449	26.1369	26.0776	1991800	1761200	2124000	315770	433650	284070	8	0.0315339	0.0121638	Q15361;B4DZG2;A0A024R8C1;A0A087WY09	Q15361;B4DZG2;A0A024R8C1	Transcription termination factor 1	TTF1
25.2972	25.2381	25.5064	25.3331	25.0459	25.6293	1762600	1150100	1911200	597770	314600	566530	4	0.0198002	0.0111237	Q53HM6;Q12874;B3KY12;A8K7V1;A8K566;B4DW90	Q53HM6;Q12874;B3KY12;A8K7V1;A8K566;B4DW90	Splicing factor 3A subunit 3	SF3A3
24.2804	24.4226	24.3866	24.8891	24.3943	23.7744	339130	142300	244040	44765	0	49419	2	0.010747	0.0106023	Q14160;A0A0G2JNZ2;A0A0G2JPP5;A0A0G2JMS7;Q5T0G3;Q9BTT6;A8K883	Q14160;A0A0G2JNZ2;A0A0G2JPP5;A0A0G2JMS7	Protein scribble homolog	SCRIB
26.5792	26.9883	27.2389	26.742	26.8995	27.1374	1261000	1222100	2093100	432760	962990	277620	18	0.0134687	0.00912348	Q10570;D3DWL9;B4DEF4;A0A087X101;Q9C0J6;E9PIM1	Q10570;D3DWL9	Cleavage and polyadenylation specificity factor subunit 1	CPSF1
27.4845	27.1488	26.9212	27.298	26.9185	27.3108	9108200	7470200	5179700	2215000	960570	1093000	9	0.0143823	0.00904338	A0A0C4DGS1;P39656;A0A024RAD5;U3KQ84	A0A0C4DGS1;P39656;A0A024RAD5;U3KQ84	Dolichyl-diphosphooligosaccharide--protein glycosyltransferase 48 kDa subunit	DDOST
25.6018	24.955	25.26	25.3156	25.1497	25.3255	5931900	2224000	3117600	1182300	285800	820100	5	0.0146996	0.00867144	Q96J85;Q71RC2;Q6P4E2;X6RLN4;Q8TBL5;A0A087WTL9;F8W1I4;F8VY40	Q96J85;Q71RC2;Q6P4E2;X6RLN4	La-related protein 4	LARP4
25.7887	26.2137	26.1887	26.0337	26.0568	26.0746	1862000	1677300	2062900	576450	728250	449030	8	0.0209115	0.0086689	Q96FV9;A0A087WWS1;R4GMN4;J3KRD7;R4GN58;J3QQZ3;J3KT14;A0A087WY84	Q96FV9;A0A087WWS1;R4GMN4	THO complex subunit 1	THOC1
28.0522	28.4039	28.7418	28.2453	28.1875	28.7402	19927000	17101000	26829000	5970600	5859100	9598500	6	0.0102798	0.00827726	Q6FHQ0;Q16576;E9PC52;A8K6A2;Q5JP01;Q5JNZ6	Q6FHQ0;Q16576;E9PC52;A8K6A2	Histone-binding protein RBBP7	RBBP7
22.9851	23.8797	23.4541	23.5773	22.718	24.0102	318670	290270	317950	57567	44611	39565	3	0.00321585	0.00451787	B7ZAA7;B7Z6X7;Q8N5C6;B3KPM8	B7ZAA7;B7Z6X7;Q8N5C6;B3KPM8	S1 RNA-binding domain-containing protein 1	SRBD1
26.1696	25.0797	24.6702	25.1795	25.1354	25.5926	3774000	1422800	951650	873470	630460	1603900	3	0.00280008	0.00403214	F5GX11;P25786;V9HW55;B4E0X6;B4DEV8	F5GX11;P25786;V9HW55;B4E0X6;B4DEV8	Proteasome subunit alpha type-1;Proteasome subunit alpha type	PSMA1
26.3355	26.5122	26.8029	26.4184	26.2129	27.0081	5364600	4747300	5290100	1481400	885740	1015900	7	0.0044531	0.00373395	B1AKN5;Q12857;B4DRN9;B1AKN8;B1AKN6;B1AKN7;S4R3K4;S4R3W2;S4R308;K7EMQ5;K7ESG9;K7EKH0;K7EJB0;Q7Z3K7;C9JWJ8;K7EN08;D2DXM9;Q14938;B4DHW2	B1AKN5;Q12857;B4DRN9;B1AKN8;B1AKN6;B1AKN7;S4R3K4	Nuclear factor 1 A-type;Nuclear factor 1	NFIA
27.3894	27.393	27.6944	27.3691	27.4304	27.6661	10580000	8273300	10797000	3373900	2950000	3834900	5	0.00900388	0.00371361	V9HW04;P62140;B4DJ75;B7ZB67;E7ETD8;C9J9S3;C9JP48;B4E163;C4TNW6;H0Y3Y6;F8W1A0;C4TNW5;F8WE71	V9HW04;P62140;B4DJ75;B7ZB67	Serine/threonine-protein phosphatase PP1-beta catalytic subunit;Serine/threonine-protein phosphatase	PPP1CB
30.8736	31.2251	31.4579	31.1353	31.1659	31.2448	92789000	86996000	114020000	42359000	28829000	32997000	21	0.00667839	0.00351906	P38919;A0A024R8W0;I3L3H2;Q59GT8;Q5JWW0;J3QQP0;E9PBH4;F8WE11	P38919;A0A024R8W0	Eukaryotic initiation factor 4A-III;Eukaryotic initiation factor 4A-III, N-terminally processed	EIF4A3
23.5091	23.8586	23.7644	23.7699	23.653	23.6993	314580	286780	311300	54079	37631	0	3	0.00978586	0.00326284	Q9UJX5;B3KN47;D6RAP6	Q9UJX5;B3KN47	Anaphase-promoting complex subunit 4	ANAPC4
33.777	34.3754	34.7904	33.9701	34.229	34.7381	734520000	839950000	1148500000	324580000	276290000	453160000	29	0.00165677	0.00188192	P22626;A0A087WUI2;I6L957;A0A024RA28	P22626;A0A087WUI2;I6L957;A0A024RA28	Heterogeneous nuclear ribonucleoproteins A2/B1	HNRNPA2B1
25.0447	23.8081	24.7914	25.4208	23.1824	25.0354	159600	49769	58370	54780	19899	34071	4	0.000775737	0.00187302	P58107	P58107	Epiplakin	EPPK1
26.3695	26.6277	26.5542	26.6702	26.2167	26.6653	976700	992920	1090600	388700	197570	273340	11	0.000489658	-0.000253677	A6NNK5;Q12888;B7Z3E7;H7BZY0;B3KVT9;M0R142;H7C495;A8KA50	A6NNK5;Q12888;B7Z3E7	Tumor suppressor p53-binding protein 1	TP53BP1
25.8251	26.3094	26.2181	25.9571	25.9667	26.4297	7679000	7701900	7428800	2845200	2054300	3193200	4	0.000508841	-0.000336329	Q9BRL6;A0A024R3A8;A4D2F7	Q9BRL6;A0A024R3A8	Serine/arginine-rich splicing factor 8	SRSF8
28.8947	29.5034	29.7921	29.4068	29.3474	29.4443	5088600	5856500	8266300	2595800	1781200	2208400	34	0.00338134	-0.0027504	P24928;A0A087WWE2;B4DET1;Q15161	P24928;A0A087WWE2	DNA-directed RNA polymerase II subunit RPB1	POLR2A
28.8721	29.1343	29.1055	28.857	29.0082	29.2578	77256000	73181000	91979000	30989000	23237000	28099000	8	0.00849667	-0.00370344	E5RI99;P62888;A0A024R9D3;E5RJH3;A0A0C4DH44;A0A0B4J213	E5RI99;P62888;A0A024R9D3	60S ribosomal protein L30	RPL30
27.305	27.2511	27.2927	27.461	26.9704	27.4298	8110900	4404800	5880000	3265100	989860	2283400	11	0.00850227	-0.00412178	Q9BTV4;A0A024R2F9;A0A0S2Z5N2;Q8TEP9;V9GY05	Q9BTV4;A0A024R2F9;A0A0S2Z5N2;Q8TEP9	Transmembrane protein 43	TMEM43;FLJ00144
24.8208	25.185	25.1837	25.2336	25.5209	24.4519	1292400	932200	1000800	404400	265960	71480	7	0.00543441	-0.00566483	Q9NUL7	Q9NUL7	Probable ATP-dependent RNA helicase DDX28	DDX28
28.7273	29.1776	29.369	28.9608	29.1517	29.1785	56782000	54928000	66508000	23036000	19784000	20935000	8	0.00928196	-0.00570107	Q6FHM6;P55769;B1AHD1	Q6FHM6;P55769;B1AHD1	NHP2-like protein 1;NHP2-like protein 1, N-terminally processed	NHP2L1
26.4552	26.8712	26.9208	26.7473	26.6449	26.8722	2338400	2965400	1518200	724770	378630	122800	12	0.0116567	-0.00570742	Q9UKN8;Q05CN7;B3KNH2;F2Z356	Q9UKN8;Q05CN7	General transcription factor 3C polypeptide 4	GTF3C4
26.006	26.1299	26.1699	26.0426	26.006	26.2757	2077000	1593100	2080200	527110	380570	339750	12	0.0210757	-0.00618172	Q92499;A3RJH1;F1T0B3;A0A087X2G1;B4DP70	Q92499;A3RJH1;F1T0B3;A0A087X2G1;B4DP70	ATP-dependent RNA helicase DDX1	DDX1
28.2511	28.5503	28.5674	28.2547	28.4121	28.7247	11341000	9315600	8805600	2375100	1771800	1849900	25	0.0145032	-0.00753975	Q9BVJ6;B4E343;X6RJY0;Q5TAP6;Q08E77;A0A024RDV0;O60531	Q9BVJ6;B4E343	U3 small nucleolar RNA-associated protein 14 homolog A	UTP14A
31.4715	28.5572	27.6579	28.8355	29.1926	29.6816	412060000	47925000	22141000	28988000	25506000	37275000	11	0.00213295	-0.00768725	P10599;H9ZYJ2	P10599;H9ZYJ2	Thioredoxin	TXN
27.4087	24.94	25.367	25.5384	25.7343	26.4807	5789400	331690	757110	606380	572750	1589500	9	0.00505213	-0.0125542	B3KTA3;Q16658;B3KTM9	B3KTA3;Q16658	Fascin	FSCN1
31.7843	32.0391	32.1752	31.9872	31.9721	32.0772	193620000	177260000	200410000	82150000	59416000	68921000	4	0.0358402	-0.0126152	P51991;B4E036	P51991	Heterogeneous nuclear ribonucleoprotein A3	HNRNPA3
28.9978	29.2589	29.0844	29.131	29.2953	28.9554	17011000	15001000	16267000	4329200	4616800	3218800	23	0.0368348	-0.0135447	Q1KMD3;H3BQZ7	Q1KMD3;H3BQZ7	Heterogeneous nuclear ribonucleoprotein U-like protein 2	HNRNPUL2;hCG_2044799
28.3233	28.3638	28.511	28.5251	28.4143	28.3003	10084000	7905400	10400000	3464000	1743500	2290400	27	0.0552864	-0.0138416	P54136;B4DXW6;E5RJM9;E5RH09;E5RI24	P54136;B4DXW6	Arginine--tRNA ligase, cytoplasmic	RARS
30.4487	30.9056	30.9392	30.8915	30.7995	30.6442	43066000	63811000	49831000	21468000	14034000	13384000	20	0.0268735	-0.01393	O60832;C9IYT0;U5UA77;H7C0M1;U5U7S7;H7C2Q9;H7C2Q2;H7BZF2;U5U768	O60832;C9IYT0;U5UA77	H/ACA ribonucleoprotein complex subunit 4	DKC1
28.1876	28.2814	29.0102	28.3089	28.3943	28.8205	13730000	10656000	26004000	6246900	5023300	6775100	16	0.0161497	-0.0148201	Q9ULV4;B3KN06;A0A024RBI5;Q59EA2;Q53G58;B4DMH3;B4E3S0;B7Z9V0;H0YHL7;F8W1H8;F8VUX3;F8VSA4;F8VRE9;F8VTT6;F8VVB7;F8VV53;B3KRY9;B3KSZ9;J3QLV6;J3KSS5;Q6QEF8	Q9ULV4;B3KN06;A0A024RBI5;Q59EA2;Q53G58;B4DMH3;B4E3S0;B7Z9V0	Coronin-1C;Coronin	CORO1C
24.3346	24.0377	24.4577	23.921	24.3985	24.5554	3233700	1999400	2708000	454220	949860	933120	3	0.0218952	-0.0149523	P49458;Q8WVW9;Q6P2S0;Q659G3;E9PE20;A0A024R3P3	P49458;Q8WVW9	Signal recognition particle 9 kDa protein	SRP9
24.7924	23.5124	23.6928	23.2124	23.989	24.8414	552340	171020	246580	57070	108560	166110	2	0.00803893	-0.0151018	B4DM22;Q13200;Q59EG8;Q13041;Q9NSM5	B4DM22;Q13200;Q59EG8;Q13041;Q9NSM5	26S proteasome non-ATPase regulatory subunit 2	PSMD2;DKFZp564A2282
24.0909	23.8895	23.6614	24.1937	24.0406	23.4544	352520	280120	283070	53319	26467	0	5	0.0202353	-0.0156231	Q15572;B7Z9B2;H3BUZ7;H3BNH3;H3BR91	Q15572;B7Z9B2	TATA box-binding protein-associated factor RNA polymerase I subunit C	TAF1C
23.5616	23.7184	23.7291	23.4464	23.7202	23.8937	614830	504600	527650	137860	0	128240	2	0.0412205	-0.0170778	E9PNW8;Q9H600;Q8WVX9;B2RDG1	E9PNW8;Q9H600;Q8WVX9;B2RDG1	Fatty acyl-CoA reductase 1	FAR1
29.2042	27.4754	27.7853	27.6906	27.6859	29.1497	21377000	3744300	5222800	2336200	1459400	5647900	19	0.00932779	-0.0204442	V9HW22;P11142;Q53HF2;E9PKE3;Q53GZ6;B3KTV0;Q96IS6;E9PN89;E9PNE6;B4DTX2;E9PLF4;B4E1Q1;E9PQQ4;E9PQK7;E9PK54;E9PPY6;E9PI65;A8K7Q2;P54652;A0A024R6B5;E9PN25;B3KUS2;A4D111;E9PS65;Q96BE0;Q9NZ87;Q9NWW3;E9PM13;Q96H53	V9HW22;P11142;Q53HF2;E9PKE3;Q53GZ6;B3KTV0;Q96IS6;E9PN89;E9PNE6;B4DTX2;E9PLF4;B4E1Q1	Heat shock cognate 71 kDa protein	HSPA8
30.0846	30.0128	30.1743	30.0413	30.1166	30.1801	122430000	82188000	101220000	37829000	30221000	34052000	10	0.13197	-0.0220871	M0R0F0;Q53G25;P46782;A0A024R4Q8;M0R0R2;M0QZN2;Q59EK8	M0R0F0;Q53G25;P46782;A0A024R4Q8;M0R0R2;M0QZN2	40S ribosomal protein S5;40S ribosomal protein S5, N-terminally processed	RPS5
28.0993	28.5452	28.7865	28.392	28.5443	28.5628	17698000	19823000	22829000	7595500	3543200	6900200	14	0.0369119	-0.0227006	P08621;A8KAQ5;A0A024QZD5;M0QYR1;B3KPV0;M0QX04;Q9UFS1	P08621;A8KAQ5;A0A024QZD5	U1 small nuclear ribonucleoprotein 70 kDa	SNRNP70
27.0316	27.5582	27.6	27.4529	27.5007	27.3046	5220800	6178600	6896400	1960200	1375700	1052900	13	0.0404075	-0.0228316	B2RD09;Q96P11;Q63ZY6;B3KSU5;Q3KNT7;B4E119	B2RD09;Q96P11	Putative methyltransferase NSUN5	NSUN5
26.9907	27.0395	27.3491	27.5233	27.3284	26.5973	6346200	7490900	5488200	2163300	1463400	583310	11	0.0256732	-0.0232461	Q9Y3I0;B4DNA0;B4DNG5;B4DXF1	Q9Y3I0;B4DNA0	tRNA-splicing ligase RtcB homolog	C22orf28
29.4921	26.9676	26.4733	27.3209	27.6738	28.0087	36205000	3691600	2668900	1930600	2207500	2623400	15	0.00807102	-0.0234655	Q96QA5;J3KRG2	Q96QA5;J3KRG2	Gasdermin-A	GSDMA
25.658	26.33	25.9981	25.8731	26.4657	25.7197	3788100	4396400	3833300	1648000	1536800	1168600	5	0.0270833	-0.0241311	Q9NRX1;B2R823;F8WBJ6	Q9NRX1;B2R823;F8WBJ6	RNA-binding protein PNO1	PNO1
29.4203	29.7858	30.073	29.6962	29.8144	29.842	111240000	97629000	129000000	38568000	38222000	41190000	11	0.043019	-0.0244878	P62316;K7ERG4;K7EJB5	P62316;K7ERG4	Small nuclear ribonucleoprotein Sm D2	SNRPD2
28.1665	28.5715	28.558	28.436	28.5755	28.3608	11426000	10234000	9811900	3703400	2843500	2390600	18	0.0599257	-0.025411	A8K3W4;A0A024R0J9;A0A0A0MRA5;B7Z4B8;Q9BUJ2;A8K6U7;A8K5K0;M0R3F1;M0QYZ0;B3KM60;M0QYI8;M0QZV6;M0R0K8;M0R203;M0QYM5	A8K3W4;A0A024R0J9;A0A0A0MRA5;B7Z4B8;Q9BUJ2;A8K6U7;A8K5K0;M0R3F1;M0QYZ0	Heterogeneous nuclear ribonucleoprotein U-like protein 1	HNRNPUL1
24.8808	25.1998	25.1814	25.1208	25.1807	25.0428	2550500	2643500	2823500	695150	586180	724350	5	0.0878308	-0.0274022	Q14331;E9PRR7;E9PLY7;Q05D61;Q96ND1	Q14331;E9PRR7	Protein FRG1	FRG1
25.4377	25.7809	25.8122	25.8301	25.7659	25.5235	2856600	2936500	3324400	1192200	865400	709960	5	0.0679357	-0.029583	Q05BI1;A0JLT1;O15446;A8K818	Q05BI1;A0JLT1;O15446;A8K818	DNA-directed RNA polymerase I subunit RPA34	CD3EAP
29.8249	30.1804	29.9904	30.0894	30.1499	29.8483	37958000	34040000	33596000	14532000	11218000	10521000	21	0.078238	-0.0306352	Q5BKZ1;A0A0A0MRN4;E2QRN4	Q5BKZ1;A0A0A0MRN4	DBIRD complex subunit ZNF326	ZNF326
27.5077	27.2604	27.3724	27.4269	27.4348	27.3755	3747300	2157400	2641400	1123800	558980	625330	20	0.163982	-0.0321852	Q6ZRV2;J3KPS2;F4ZCG5;F4ZCG4	Q6ZRV2;J3KPS2	Protein FAM83H	FAM83H
27.0057	27.3728	27.4269	27.2873	27.4994	27.1197	5908600	5069900	6006600	2154900	1658300	973490	11	0.0683244	-0.0336437	O43823;Q8NE02;B7Z8L8;Q9UG73;M0QYL4	O43823;Q8NE02;B7Z8L8	A-kinase anchor protein 8	AKAP8
24.9653	24.9271	25.614	25.3498	24.9057	25.3536	1471000	628830	2107900	524880	76067	433460	5	0.0436432	-0.0342674	A0A0J9YYL3;A0A0J9YXJ8;A0A0J9YVP6;A0A0J9YXX5;Q9UHX1;A0A0J9YVR6;E9PQ56;A0A0J9YWM1;H0YEM1;E9PMU7;E9PN18;H0YCP8;E9PL19	A0A0J9YYL3;A0A0J9YXJ8;A0A0J9YVP6;A0A0J9YXX5;Q9UHX1;A0A0J9YVR6;E9PQ56;A0A0J9YWM1;H0YEM1	Poly(U)-binding-splicing factor PUF60	PUF60
26.2026	26.5427	26.7119	26.9469	26.4652	26.1488	6878900	6363500	5497100	2464200	1299600	1342300	9	0.0426784	-0.0345783	Q9BU76	Q9BU76	Multiple myeloma tumor-associated protein 2	MMTAG2
30.0837	30.1592	29.9323	30.1972	30.1046	29.9815	53959000	39160000	38175000	21414000	13586000	15369000	21	0.146729	-0.0360584	Q99623;J3KPX7;F5GY37;B4DW05;F5GWA7;F5H3X6;F5H0C5;F5H2D2;Q9BXV3;U3KPZ5	Q99623;J3KPX7;F5GY37;B4DW05;F5GWA7;F5H3X6	Prohibitin-2	PHB2
28.0074	27.7355	27.9853	27.8482	27.8566	28.1354	17597000	8175400	17209000	5499400	4185100	4232700	13	0.104605	-0.0373103	B2R7T8;B1AK87;B1AK88;B4DWA6;P47756;B1AK85;Q7L4N0	B2R7T8;B1AK87;B1AK88;B4DWA6;P47756;B1AK85	F-actin-capping protein subunit beta	CAPZB
26.4219	26.4911	26.7428	26.5312	26.4982	26.7434	4845400	9667300	7031900	1150700	1373900	1948700	8	0.11403	-0.0390027	Q13868;A3KFL2;B3KQW2;A3KFL1;A3KFL5;B4E001;A2VCR1	Q13868;A3KFL2;B3KQW2;A3KFL1;A3KFL5;B4E001	Exosome complex component RRP4	EXOSC2
30.2669	30.5919	30.4881	30.3937	30.6284	30.4418	140960000	111550000	132700000	52213000	42187000	45031000	2	0.118773	-0.0390059	Q5VVD0;P62913;Q5VVC8;Q5VVC9	Q5VVD0;P62913;Q5VVC8;Q5VVC9	60S ribosomal protein L11	RPL11
27.3405	27.4846	27.5523	27.3891	27.4258	27.6809	12131000	10242000	13133000	4307600	3510200	3514300	10	0.130683	-0.0394611	J3QT28;A0A140VJF3;O43684;B4DDM6;J3QSX4	J3QT28;A0A140VJF3;O43684;B4DDM6;J3QSX4	Mitotic checkpoint protein BUB3	BUB3
25.8506	25.7886	25.7954	25.8124	25.9037	25.8392	3293200	1175100	2279600	198760	458310	462010	4	0.529703	-0.0402514	Q96GM5;A0A024R137;A0A024R102;B4DF50;F8VZ70;F8VUB0;F8VW95;C9JYI7;A8K9I5;F8VRQ4;B7ZA58;B7Z4U8;H0YHV1	Q96GM5;A0A024R137;A0A024R102;B4DF50;F8VZ70;F8VUB0;F8VW95	SWI/SNF-related matrix-associated actin-dependent regulator of chromatin subfamily D member 1	SMARCD1
26.1675	26.3861	26.4923	26.5375	26.3493	26.2842	967820	994910	1209700	409180	304730	178550	10	0.125041	-0.0417156	Q7Z6E9;H3BUN0;H3BSK8;B4DZQ0;A0A087WY32;I3L3Y2	Q7Z6E9;H3BUN0;H3BSK8;B4DZQ0	E3 ubiquitin-protein ligase RBBP6	RBBP6
28.522	28.654	29.0068	28.8161	28.6756	28.8182	8301800	6410600	8502800	3432900	2723400	3447300	2	0.0998801	-0.0423648	Q53HS0;P47897;A8K3A8;B4DNN3;C9J165;A0A0U1RQT0;B7Z840;A0A0U1RQM8;A0A0U1RQE9;A0A0U1RQU2;A0A0U1RRI9;B4DTH6;A0A0U1RQC3;F2Z2V6;I3QNU8	Q53HS0;P47897;A8K3A8;B4DNN3;C9J165	Glutamine--tRNA ligase	QARS
23.3424	23.5619	23.4072	23.6786	23.6512	23.1105	266810	420400	393550	62341	0	40141	4	0.076981	-0.0428912	Q69YS0;Q8TEM7;Q86TA5;Q96N46;F8WDA3;C9JCY7;F8WDH5	Q69YS0;Q8TEM7;Q86TA5;Q96N46	Tetratricopeptide repeat protein 14	DKFZp313K2110;FLJ00166;DKFZp451L0319;TTC14
30.3965	30.619	30.9748	30.6278	30.6122	30.8815	35476000	23043000	37032000	11648000	8123300	11244000	44	0.0814732	-0.0437393	B3KX19;Q15029;A8KAP3;Q6IBM8;Q8IXJ3;B4DZB1;B3KWY2;K7EP67;K7EJ74;K7EIT3	B3KX19;Q15029;A8KAP3;Q6IBM8;Q8IXJ3;B4DZB1;B3KWY2	116 kDa U5 small nuclear ribonucleoprotein component	EFTUD2;U5-116KD;SNRP116
24.6103	24.9786	25.1924	25.13	24.8397	24.9512	606460	1087200	1600800	385040	327810	209130	7	0.0869186	-0.0464865	E9PM72;B4DSE1;Q9NVC6;A0A1W2PS27;A0A1W2PRB8;A0A1W2PS69;A0A1W2PNW7;A0A1W2PQ48;A0A1W2PRX4;A0A1W2PNF3;A0A1W2PQE4;A0A1W2PPP8;A0A1W2PR99;E9PKQ4	E9PM72;B4DSE1;Q9NVC6;A0A1W2PS27;A0A1W2PRB8;A0A1W2PS69;A0A1W2PNW7;A0A1W2PQ48;A0A1W2PRX4	Mediator of RNA polymerase II transcription subunit 17	MED17
28.8786	28.9703	29.1175	29.1009	29.0406	28.9654	13183000	10155000	13667000	5719800	3608300	4240200	29	0.229864	-0.046847	P14868;A0A140VJW5;D3DP78;Q53T60;Q53R85;C9J7S3;C9JLC1;H7BZ35;H7C278;C9JQM9	P14868;A0A140VJW5;D3DP78;Q53T60	Aspartate--tRNA ligase, cytoplasmic	DARS
25.06	25.3254	25.3604	25.6053	25.2403	25.0452	4706900	4146900	4467300	2093200	1290700	1007900	4	0.0907536	-0.0483068	P0C7P0	P0C7P0	CDGSH iron-sulfur domain-containing protein 3, mitochondrial	CISD3
24.5551	24.4612	24.276	24.7441	24.9168	23.7764	1191100	1883200	751190	690040	620230	0	4	0.0453444	-0.0483233	Q9NXS2;K7EQG1	Q9NXS2;K7EQG1	Glutaminyl-peptide cyclotransferase-like protein	QPCTL
28.3386	28.5536	28.872	28.6701	28.6147	28.6246	13822000	9336100	13521000	4554400	3119300	3863100	26	0.112498	-0.0483805	Q6IAP9;Q5T1M7;O43172;Q59EL4;B2R7V4	Q6IAP9;Q5T1M7;O43172;Q59EL4;B2R7V4	U4/U6 small nuclear ribonucleoprotein Prp4	PRPF4
26.4378	27.0052	27.4169	27.1062	26.8466	27.0527	37805000	27215000	60425000	16257000	11820000	14777000	3	0.0569143	-0.0485268	P62304;A6NHK2	P62304;A6NHK2	Small nuclear ribonucleoprotein E	SNRPE
31.0965	27.7789	27.8622	28.7234	28.7315	29.4309	200830000	9916600	12286000	7132100	7678400	10269000	16	0.0146459	-0.0494143	V9HW43;P04792;B4DL87;F8WE04;C9J3N8	V9HW43;P04792;B4DL87	Heat shock protein beta-1	HSPB1
25.4919	25.892	26.0088	25.8441	26.017	25.6825	2028200	2115300	2596600	1179000	876360	590240	3	0.0980095	-0.0503108	Q13829;K7EM01;J3QSD4;J3QS43	Q13829	BTB/POZ domain-containing adapter for CUL3-mediated RhoA degradation protein 2	TNFAIP1
28.4974	28.8258	28.9872	28.7283	28.8628	28.8736	21700000	25063000	24428000	8542800	7374000	8314400	10	0.12411	-0.0514018	O15160;Q96HT3;E7EQB9;D6RDJ3;B4DEC2;H0Y723	O15160;Q96HT3;E7EQB9;D6RDJ3;B4DEC2	DNA-directed RNA polymerases I and III subunit RPAC1	POLR1C
24.3226	24.2262	24.7716	25.7351	22.9878	24.7545	197010	128150	288480	195350	18902	115060	2	0.0212611	-0.0523567	A0A087X0K9;Q6MZU1;G5E9E7;Q07157;A9CQZ8;G3V1L9;Q68DX9	A0A087X0K9;Q6MZU1;G5E9E7;Q07157;A9CQZ8;G3V1L9;Q68DX9	Tight junction protein ZO-1	DKFZp686A1195;TJP1;DKFZp686M05161
26.5617	26.7091	27.0876	26.9358	26.768	26.8148	6050400	3026200	6969700	2857000	1916700	2062000	3	0.118321	-0.0534255	Q13155;B2R7M3;A0A024QZY1;A8MU58;F8W950	Q13155;B2R7M3;A0A024QZY1;A8MU58;F8W950	Aminoacyl tRNA synthase complex-interacting multifunctional protein 2	AIMP2
27.8834	28.2159	28.6433	28.294	28.1723	28.4384	12650000	11659000	17055000	6123900	1972100	3956800	11	0.0819443	-0.0540142	Q9GZL7;Q53T99;B4DRY7	Q9GZL7;Q53T99;B4DRY7	Ribosome biogenesis protein WDR12	WDR12
24.9644	25.1599	25.1514	25.0346	25.3872	25.0166	1096100	931510	1141900	388620	291250	284620	5	0.148077	-0.0542889	Q9NVV4;Q5T851;Q5T852	Q9NVV4	Poly(A) RNA polymerase, mitochondrial	MTPAP
31.8054	32.196	31.8216	31.7665	32.1178	32.102	461500000	422720000	357670000	125900000	122210000	140490000	6	0.115264	-0.0544103	P16403;P16402;Q02539;P22492;A1L407	P16403;P16402	Histone H1.2;Histone H1.3	HIST1H1C;HIST1H1D
25.5581	25.8676	25.622	25.5108	25.9001	25.8027	5709900	6666400	6639900	2250000	2315600	2407400	4	0.135869	-0.0553296	P37108;H0YLA2;H0YLW0	P37108;H0YLA2	Signal recognition particle 14 kDa protein	SRP14
27.2172	27.684	28.1808	27.6457	27.7077	27.8954	17067000	15966000	24964000	7530400	6257800	7175400	6	0.0672984	-0.055577	A0A087WVZ9;P19388;E5KT65;B4DJ89;A0A087WWX0;A0A0A0MQR7;A0A087WVN5	A0A087WVZ9;P19388;E5KT65;B4DJ89;A0A087WWX0;A0A0A0MQR7	DNA-directed RNA polymerases I, II, and III subunit RPABC1	POLR2E
29.4582	29.6178	30.1933	29.7236	29.7399	29.9775	49294000	37825000	65378000	22084000	17469000	20454000	9	0.0852378	-0.0571899	P31942;A0A024QZK8;Q53F48;B4DHY1;A0A024QZP1	P31942;A0A024QZK8;Q53F48;B4DHY1;A0A024QZP1	Heterogeneous nuclear ribonucleoprotein H3	HNRNPH3
27.1037	26.265	26.295	26.5831	26.4846	26.7688	12984000	5060900	5262500	2981800	1483000	2940600	7	0.0701539	-0.0575663	V9HWC6;P23284	V9HWC6;P23284	Peptidyl-prolyl cis-trans isomerase B	PPIB
24.695	23.3059	23.5509	23.9136	23.9877	23.8241	363640	95314	136580	0	19795	11917	5	0.0459261	-0.0578435	Q9Y4K1;A0A0J9YWL0;B4DLI1;B7ZAH2;Q96QW7;Q6P5P8	Q9Y4K1;A0A0J9YWL0;B4DLI1;B7ZAH2	Absent in melanoma 1 protein	AIM1
27.1379	27.4508	27.6814	27.3582	27.4988	27.5876	9759000	6569300	8413900	1863300	2497000	3085000	9	0.124374	-0.0581652	Q7Z726;P52292;A8K7D9;J3QLL0;J3KS65;J3QL07	Q7Z726;P52292;A8K7D9;J3QLL0;J3KS65	Importin subunit alpha;Importin subunit alpha-1	KPNA2
27.2511	27.5992	27.3392	27.44	27.5557	27.3684	9593700	7325300	8361600	2802500	2173800	2102200	11	0.188963	-0.0582275	Q5T280;Q9P041;R4GNG4;B4E0X4	Q5T280	Uncharacterized protein C9orf114	C9orf114
27.1197	27.7823	27.8105	27.6757	27.5166	27.7065	52949000	62151000	68760000	26314000	14505000	20125000	7	0.0951386	-0.0620829	Q9NPE3;H0YM60	Q9NPE3	H/ACA ribonucleoprotein complex subunit 3	NOP10
26.2562	26.4335	26.8937	26.355	26.7292	26.6859	2707800	2208700	3267400	1055000	1091500	1217100	4	0.0998405	-0.0622476	B9A018;Q53GS9;F8WC91;B3KPG7;B3KMG1;B7Z7L9;A0A087X1B2	B9A018;Q53GS9;F8WC91;B3KPG7;B3KMG1;B7Z7L9;A0A087X1B2	U4/U6.U5 tri-snRNP-associated protein 2	USP39
28.9945	29.346	29.0081	29.4346	29.1649	28.9369	192330000	171450000	142300000	79427000	48097000	49531000	6	0.124366	-0.0626017	P63173;A0A024R8P8;J3KT73;J3QL01;J3KSP2	P63173;A0A024R8P8;J3KT73;J3QL01	60S ribosomal protein L38	RPL38
23.8371	24.5531	24.6109	24.7083	23.9322	24.5517	337580	565550	2139000	242890	153900	218740	3	0.0645211	-0.0637061	Q8IY67;A0A087WZ13;E9PAU2;K7EKR9	Q8IY67;A0A087WZ13;E9PAU2;K7EKR9	Ribonucleoprotein PTB-binding 1	RAVER1
23.9115	24.211	24.4411	24.2934	24.0607	24.4078	1024200	1409700	1818900	570330	243060	344960	6	0.132018	-0.0660985	A2IDA3;Q1W6H1;P29372	A2IDA3;Q1W6H1;P29372	DNA-3-methyladenine glycosylase	MPG
26.9141	26.7812	27.1237	26.7734	26.9272	27.3185	8739800	6476300	7900900	2319100	1774500	3358500	4	0.128575	-0.0667235	B4DRD7;H3BRU6;F8VZX2;Q15366;F8VXH9;B4DLC0;F8W0G4;F8W1G6;J3QT27;Q5MJP6;E9PFP8;P57721;F8VRH0;H3BND9;H3BSS4	B4DRD7;H3BRU6;F8VZX2;Q15366;F8VXH9;B4DLC0;F8W0G4;F8W1G6;J3QT27;Q5MJP6;E9PFP8;P57721	Poly(rC)-binding protein 2;Poly(rC)-binding protein 3	PCBP2;PCBP3
29.5287	29.8819	29.862	29.8735	29.7978	29.8031	38676000	38053000	36381000	17344000	12040000	13177000	19	0.224309	-0.0672518	Q96HS1;F5GXG4	Q96HS1	Serine/threonine-protein phosphatase PGAM5, mitochondrial	PGAM5
26.6561	26.9154	26.8312	26.8726	26.9125	26.8204	2509300	2728100	3220800	1240200	1088900	683980	12	0.346532	-0.0676092	P51116;I3L1Z2	P51116	Fragile X mental retardation syndrome-related protein 2	FXR2
28.2003	28.4084	28.7582	28.6473	28.4495	28.4752	19988000	16314000	21859000	10289000	7829600	7133900	11	0.145841	-0.0683619	Q32LZ0;Q13427;C9JN15;Q6P432;C9JM79;Q2NKQ6;E9PG73;C9JT64;C9J679	Q32LZ0;Q13427;C9JN15;Q6P432;C9JM79;Q2NKQ6;E9PG73	Peptidyl-prolyl cis-trans isomerase G;Peptidyl-prolyl cis-trans isomerase	PPIG
28.4922	28.2765	28.5099	28.4572	28.5516	28.4869	24296000	6676300	11550000	3164900	3180000	1823100	13	0.379563	-0.0723159	Q9BVI4;F5H303	Q9BVI4	Nucleolar complex protein 4 homolog	NOC4L
23.5673	23.9346	24.2467	24.902	24.0537	23.01	306290	153600	193040	196740	133130	62189	2	0.0424381	-0.072389	J3KSW8;Q6WCQ1;U6FSN9;Q8N236;B9EGI2;H0Y2S9	J3KSW8;Q6WCQ1;U6FSN9;Q8N236;B9EGI2	Myosin phosphatase Rho-interacting protein	MPRIP
27.6877	27.4767	27.9346	27.5102	27.6234	28.1868	9544700	3535600	6187200	1993100	1294600	2711500	2	0.107695	-0.0738258	O60506;B2R8Z8;Q05CK9;F6UXX1	O60506;B2R8Z8;Q05CK9	Heterogeneous nuclear ribonucleoprotein Q	SYNCRIP
28.0251	28.2346	28.4415	28.2384	28.24	28.445	4213100	3134400	4443000	1545900	948650	1055400	19	0.207003	-0.0740833	Q8NI27;A0A0C4DG98;B4DKZ6;H0Y815;Q6P441;F2Z2V2	Q8NI27;A0A0C4DG98	THO complex subunit 2	THOC2
30.0177	30.1875	30.6154	30.3631	30.4263	30.2551	54701000	39143000	63128000	23093000	17229000	16985000	20	0.150572	-0.0745926	B4DRA0;Q14498;G3XAC6;Q68DD9;B4E1M7;B4DLM0;B3KWX7;A0A0U1RQH7;B7Z4L7;Q6N037;E1P5S2;Q6MZY7;Q7Z3L0;H0Y4X3;A0A0U1RQW2;Q5QP23;Q5QP22;A0A0S2Z5I1;Q6IA98;A0A0S2Z5J3;B2RDP1;Q86U06;A0A0S2Z5D9;F8WF24;F2Z2Z5;A8MYG5;G3V5Z6;H0YJJ3;G3XAP0;B7Z8M4;B3KWQ8;A0A087X122;H0Y6I9;G3V546	B4DRA0;Q14498;G3XAC6;Q68DD9;B4E1M7;B4DLM0;B3KWX7;A0A0U1RQH7;B7Z4L7;Q6N037;E1P5S2;Q6MZY7;Q7Z3L0;H0Y4X3;A0A0U1RQW2	RNA-binding protein 39	RBM39;DKFZp781C0423;DKFZp686A11192;DKFZp686C17209;DKFZp781I1140
25.5222	24.2966	24.1024	24.3801	24.6529	25.1143	3953000	709710	698670	381390	371160	439910	5	0.0525764	-0.0753765	V9HWH6;P00491;Q8N7G1;Q9P1G4;G3V5M2;G3V2H3	V9HWH6;P00491;Q8N7G1;Q9P1G4	Purine nucleoside phosphorylase	PNP
27.3371	26.9714	27.3612	27.2554	27.3674	27.2769	11496000	4875200	7815000	2752600	2267000	1764700	4	0.229999	-0.0766932	Q13838;A0A024RCM3;Q5STU3;A0A0G2JJZ9;A0A140T9X3;B4DP52;H0Y400;A0A0A0MT12;F6TRA5;F6WLT2;Q7KYK3;F6R6M7;F6S4E6;Q59G92;A0A0G2JHN7;F6U6E2;F6S2B7;A0A140T973;A0A140T9K1;H0YCC6;A0A140T9X9;A0A140T996;B4DIJ6;F6UJC5;A0A140TA18;B4DIZ8	Q13838;A0A024RCM3;Q5STU3;A0A0G2JJZ9;A0A140T9X3;B4DP52;H0Y400;A0A0A0MT12;F6TRA5;F6WLT2	Spliceosome RNA helicase DDX39B	DDX39B
24.9574	24.6897	25.0588	25.0933	24.8861	24.9574	17068000	9803600	14734000	6572500	3562100	4271200	2	0.241366	-0.0769602	F8VSA6;E9PS38;Q15843;S4R3E9;E9PL57	F8VSA6;E9PS38;Q15843;S4R3E9;E9PL57	NEDD8	NEDD8;NEDD8-MDP1
26.5662	26.6927	26.4042	26.6172	26.7221	26.5552	6083100	4008700	5573000	1729500	1986700	1269100	8	0.328284	-0.0771255	Q9NX58;A8K3Y5;D6RDJ1	Q9NX58;A8K3Y5	Cell growth-regulating nucleolar protein	LYAR
27.4412	27.7031	28.195	27.6297	27.8134	28.1284	3452700	2872000	4968800	1261100	934820	1139700	22	0.105457	-0.0774186	P42285;A8K6I4;B4E3M6;H0Y8U3;Q3MHC9;D6REC7	P42285;A8K6I4;B4E3M6	Superkiller viralicidic activity 2-like 2	SKIV2L2
26.674	26.2934	26.0263	26.3087	26.1715	26.748	3063800	2505300	2664400	886890	557610	685360	11	0.110512	-0.0781816	Q99832;Q6IBT3;Q53HV2;B7Z7I4;B7Z1C9;F8WAM2	Q99832;Q6IBT3;Q53HV2;B7Z7I4;B7Z1C9	T-complex protein 1 subunit eta	CCT7
26.6835	27.2863	27.3308	27.086	27.1416	27.3109	6351700	8597400	9762900	3436000	2471400	2793300	9	0.133015	-0.0792688	O75683;B3KNS8	O75683;B3KNS8	Surfeit locus protein 6	SURF6
27.8543	27.4686	27.8257	27.7371	27.7297	27.9237	49707000	27753000	35783000	14607000	11857000	14803000	6	0.22634	-0.0806427	P60866;E5RJX2;E5RIP1;G3XAN0	P60866;E5RJX2;E5RIP1	40S ribosomal protein S20	RPS20
26.5976	27.3871	27.1982	27.0524	27.2082	27.1709	3096800	3595000	3729600	1495100	1067500	993670	11	0.125032	-0.0828775	P78316;A8KA74;E9PFK5;Q96GC8	P78316;A8KA74;E9PFK5	Nucleolar protein 14	NOP14
26.188	26.4384	27.117	26.488	26.6879	26.8163	2666100	2758900	5985400	1690300	1211900	1854900	7	0.101516	-0.0829245	Q9BQ67;Q8NCK5;Q8TCJ8;B2RDP6;B4DTI1;M0QX71	Q9BQ67;Q8NCK5;Q8TCJ8;B2RDP6;B4DTI1	Glutamate-rich WD repeat-containing protein 1	GRWD1;DKFZp564C172
26.6203	26.5898	27.1294	27.2085	26.9725	26.4091	11336000	12356000	21406000	8613100	4086200	2202600	6	0.101887	-0.0835425	Q9NX24;D6RC52;D6RCB9;J3QSY4;H0YC83	Q9NX24;D6RC52;D6RCB9	H/ACA ribonucleoprotein complex subunit 2	NHP2
24.8831	25.0085	24.7344	24.9983	24.8398	25.041	664220	741020	674940	269950	263450	154730	3	0.349844	-0.0843544	Q7Z3K9;E9PPJ0;Q13435;H0YEX5	Q7Z3K9;E9PPJ0;Q13435;H0YEX5	Splicing factor 3B subunit 2	DKFZp781L0540;SF3B2
27.5013	27.6307	27.7038	27.6699	27.4907	27.9317	14302000	10789000	12523000	5447400	3464100	4778900	10	0.238683	-0.0855122	Q9Y277;E5RJN6;E5RHZ6;E5RFP6;E5RHE1;E5RK27;E5RFL1	Q9Y277;E5RJN6;E5RHZ6;E5RFP6	Voltage-dependent anion-selective channel protein 3	VDAC3
29.6251	29.7012	29.4123	29.4807	29.6799	29.835	43315000	49213000	30459000	14554000	11467000	11332000	14	0.253694	-0.0857067	Q6PUJ7;P35232;A8K401;Q53FV0;Q6FHP5;C9JW96;C9JZ20;E7ESE2;E9PCW0;D6RBK0;A8K9G2;Q9BSE8	Q6PUJ7;P35232;A8K401;Q53FV0;Q6FHP5;C9JW96;C9JZ20;E7ESE2;E9PCW0	Prohibitin	PHB
28.321	28.4673	28.7037	28.6556	28.6286	28.47	24729000	20928000	24319000	7227700	6153000	5034400	9	0.280005	-0.0874119	A0A0A0N0L3;Q13148;A0A024R4E2;A0A087WX29;B1AKP7;G3V162;A0A087X260;A0A087WYY0;A0A0A0N0M3;K7EJM5;A0A0A0N0N3;B4DRW3;K7EN94;A0A087WXQ5;A0A087WV68;A0A1W2PNU8;A0A087WW61;A0A087WX67;A0A087WXV3;A0A087WYE7;A0A087WZC9;A0A087WTZ4;K7EL26;A0A087WZM1;K7EJ99;A0A0A0MSV7	A0A0A0N0L3;Q13148;A0A024R4E2;A0A087WX29;B1AKP7;G3V162;A0A087X260;A0A087WYY0;A0A0A0N0M3;K7EJM5;A0A0A0N0N3;B4DRW3;K7EN94	TAR DNA-binding protein 43	TARDBP
27.2988	27.6728	27.8508	27.5767	27.8015	27.7106	19741000	20039000	17913000	7204100	4309500	5579300	10	0.194491	-0.0888208	Q53G61;Q53G21;P09661;H0YMA0;H0YLR3;H0YKK0;Q6NVW9;Q9UEN1;O95485	Q53G61;Q53G21;P09661;H0YMA0;H0YLR3	U2 small nuclear ribonucleoprotein A	SNRPA1
27.567	27.8957	27.7899	28.4617	27.7596	27.2979	8653400	9332000	8617500	4711400	2253400	1888200	12	0.0898519	-0.0888589	A0A1U9X8R9;P14373;Q59EC6;A0A140T9B9;A0A140T9N6;A0A140T9V9;H0Y551;A0A0G2JIZ4;A0A140T9Q6;Q59G25;A0A024RCR1;Q9HCM9;A0A024RCP5	A0A1U9X8R9;P14373;Q59EC6	Zinc finger protein RFP	TRIM27
31.4977	31.7849	32.1631	31.94	31.758	32.0254	157060000	141690000	228730000	78313000	45074000	61688000	1	0.167735	-0.0925598	Q6NTA2;P14866;M0QXS5;M0QYT0	Q6NTA2;P14866;M0QXS5	Heterogeneous nuclear ribonucleoprotein L	HNRNPL
26.9373	27.1154	27.7351	27.1514	27.0345	27.8809	2353700	2222600	3289000	823600	676310	1560400	17	0.0925048	-0.093003	Q15393;A8K6V3;B3KQH1;B3KM77;H3BMB0;J3QRB2;J3QL37;I3L4G7;J3QKV4	Q15393;A8K6V3;B3KQH1	Splicing factor 3B subunit 3	SF3B3
28.3398	28.5474	28.7249	28.5181	28.6128	28.7677	15838000	12892000	15578000	5935700	4813600	6014400	20	0.290555	-0.0955207	Q9Y265;B5BUB1;E7ETR0;B3KRS7;H7C4G5;J3QLR1;H7C4I3	Q9Y265;B5BUB1;E7ETR0;B3KRS7	RuvB-like 1	RUVBL1
32.7822	33.1568	33.205	33.2027	33.2753	32.9539	175990000	180060000	208390000	76287000	70516000	60644000	29	0.227248	-0.0959956	P52272;A0A087X0X3;Q59ES8;Q7KYM9;M0R019;B4DEG4;M0R2T0;Q6P2D7;M0R0N3;M0QYQ7;M0R2I7;M0R0Y6;M0QY96;M0QYL3;Q8TCM5	P52272;A0A087X0X3;Q59ES8;Q7KYM9	Heterogeneous nuclear ribonucleoprotein M	HNRNPM;ORF
27.8843	28.1762	28.4055	28.1951	28.2299	28.3298	11213000	11519000	14859000	5598500	3915100	4549700	8	0.243573	-0.0963084	Q9Y2P8;Q5VYW8;Q5VZU3;Q5VZU2	Q9Y2P8	RNA 3-terminal phosphate cyclase-like protein	RCL1
28.9725	29.0251	29.1532	29.0866	29.1082	29.2506	20703000	17761000	22337000	6793900	4956600	6243900	12	0.590019	-0.0982113	A0A024R9E2;A0A087WTT1;P11940;A0A024R9C1;E7EQV3;B4DZW4;E7ERJ7;B4DQX0;B3KT93;H0YAR2;H0YBN4;Q2VIP3;Q9H361;Q5VX58;Q3ZCS4;H0YAP2;H0YB86;E5RGH3;E5RJB9;E5RH24;Q4VXU2;E5RHG7;E5RGC4;E5RFD8;A8K8J2;B4DM75;Q96DU9	A0A024R9E2;A0A087WTT1;P11940;A0A024R9C1;E7EQV3;B4DZW4;E7ERJ7;B4DQX0;B3KT93;H0YAR2	Polyadenylate-binding protein 1	PABPC1
26.6435	27.0296	27.0222	27.06	26.9289	27.0016	5841300	5713400	6761900	2669000	1101700	1625600	12	0.300622	-0.0984122	Q9HCD5;Q5JY17	Q9HCD5	Nuclear receptor coactivator 5	NCOA5
26.2941	26.7933	26.951	26.7288	26.6823	26.923	8015200	9398000	6406700	1951300	1926200	1643900	7	0.177097	-0.0985533	Q6FGR6;P19387;B7Z6D1;B7Z377;H3BRR2	Q6FGR6;P19387;B7Z6D1;B7Z377;H3BRR2	DNA-directed RNA polymerase II subunit RPB3	POLR2C
28.3161	28.8639	28.8589	28.8636	28.8405	28.6344	16242000	14593000	16827000	7613600	5200600	4403600	20	0.195925	-0.099865	Q9BY77;Q96DI9;F6VRR5;B4E0L0;F8WCX5;Q659C6;B4DMM2;Q8WUT1;B4DSH9;Q6R954;F8WEE2	Q9BY77;Q96DI9;F6VRR5;B4E0L0;F8WCX5;Q659C6;B4DMM2	Polymerase delta-interacting protein 3	POLDIP3;DKFZp434G0310
28.0732	28.4377	28.4382	28.3782	28.5117	28.3628	11773000	10284000	11908000	4740800	3516600	3372600	17	0.31766	-0.101206	E9PF19;A0A0S2Z5F3;Q9Y4P3;Q8N2L6;B2RB52;B4DY50;Q96E41;B4DY59;A0A0S2Z5C1;A0A087WXC6;F8WDI9;F8WCR3	E9PF19;A0A0S2Z5F3;Q9Y4P3;Q8N2L6;B2RB52;B4DY50;Q96E41;B4DY59	Transducin beta-like protein 2	TBL2
27.2927	27.3905	27.8265	27.3912	27.6839	27.7452	9303100	7937300	12131000	3958700	3353600	4159000	10	0.202654	-0.103549	P61964;V9GZ59;V9GYQ5	P61964;V9GZ59	WD repeat-containing protein 5	WDR5
29.2548	29.3251	29.8328	29.6015	29.3955	29.7289	43908000	20134000	52684000	19320000	12620000	20162000	14	0.194137	-0.104409	Q92979;A8K6D2;B4DQC7;V9GYP5;A0A087WWQ2;B4DP65;A0A087WVM7;A0A0U3B3H7	Q92979;A8K6D2;B4DQC7;V9GYP5;A0A087WWQ2;B4DP65;A0A087WVM7	Ribosomal RNA small subunit methyltransferase NEP1	EMG1
25.9074	25.3996	25.5546	25.4693	25.8479	25.8612	740440	231500	151760	112850	69796	128260	10	0.206494	-0.105581	A0A024R889;A0A0D9SF54;Q13813;A0A0D9SGF6;Q9UG16;B4DGT1;B4DTV8;A0A0D9SFH4;Q14917	A0A024R889;A0A0D9SF54;Q13813;A0A0D9SGF6;Q9UG16	Spectrin alpha chain, non-erythrocytic 1	SPTAN1;DKFZp564P0562
28.0632	28.2424	28.4126	28.3405	28.4644	28.2315	11800000	9828600	14528000	4305900	2652000	2901200	13	0.365651	-0.10611	Q9BTX1;B4DZG6	Q9BTX1;B4DZG6	Nucleoporin NDC1	NDC1
23.6695	23.8455	24.1886	24.262	24.2337	23.5279	1228600	977820	1549600	669590	383500	225430	3	0.138751	-0.106731	H0YBZ4;Q15390;A0A024R7W1;B4E3G8	H0YBZ4;Q15390;A0A024R7W1;B4E3G8	Mitochondrial fission regulator 1	MTFR1
28.7352	29.0979	29.0927	29.1418	29.0997	29.0108	20166000	16092000	16708000	8810700	4883200	5495800	21	0.359681	-0.108819	P38432;I3L369	P38432	Coilin	COIL
28.8851	28.6845	28.8249	28.8368	28.6922	29.1984	36460000	19787000	32168000	13275000	7586900	15273000	12	0.275327	-0.111	Q53HW2;P05388;A8K4Z4;A0A024RBS2;Q6NSF2;F8VWS0;Q53HK9;F8VU65;F8VPE8;G3V210;F8VW21;B4E3D5;F8VQY6;F8VRK7;Q8NHW5;F8VZS0;F8VWV4;F8VS58;F8W1K8;Q3MHV2	Q53HW2;P05388;A8K4Z4;A0A024RBS2;Q6NSF2;F8VWS0;Q53HK9;F8VU65;F8VPE8;G3V210;F8VW21;B4E3D5;F8VQY6;F8VRK7;Q8NHW5;F8VZS0	60S acidic ribosomal protein P0;60S acidic ribosomal protein P0-like	RPLP0;RPLP0P6
28.9145	29.4038	29.5504	29.4205	29.2299	29.5513	20569000	17755000	17005000	8892900	6158000	8893100	7	0.200105	-0.111031	Q9Y512	Q9Y512	Sorting and assembly machinery component 50 homolog	SAMM50
24.8996	25.2096	25.4609	25.3297	25.1725	25.4098	883150	620860	976190	248330	117500	159690	8	0.256533	-0.113987	Q9BVG8;B7Z3I6;B7Z896;B7Z8X8;F5H3M2;B7Z808;B7Z5U4;H3BTL6;A0A0C4DGM9;Q5HYG9;H3BNZ0;H3BPE2;H3BRQ1;H3BTE9;H3BSN2	Q9BVG8;B7Z3I6;B7Z896;B7Z8X8;F5H3M2;B7Z808;B7Z5U4;H3BTL6	Kinesin-like protein KIFC3	KIFC3
31.2684	31.2793	31.3208	31.4693	31.2122	31.5345	172280000	133710000	141960000	85457000	46252000	60917000	18	0.508946	-0.115854	A0A0A0MR02;P45880;A0A024QZT0;A0A024QZN9;Q5JSD2;Q5JSD1;B4DKM5;A2A3S1	A0A0A0MR02;P45880;A0A024QZT0;A0A024QZN9;Q5JSD2;Q5JSD1;B4DKM5	Voltage-dependent anion-selective channel protein 2	VDAC2
24.5539	24.8084	24.7493	25.2635	25.356	23.8408	950040	824660	1814500	470720	772380	127890	4	0.0828234	-0.11622	Q3B7J4;O15504;B4DT96;B2R7I1;C9JYA1;F8WC66	Q3B7J4;O15504;B4DT96;B2R7I1;C9JYA1	Nucleoporin-like protein 2	NUPL2
24.203	24.3336	24.3732	24.5554	23.8797	24.83	795410	663710	938510	579890	0	153030	4	0.154302	-0.118453	Q5HYI7	Q5HYI7	Metaxin-3	MTX3
28.8466	28.5681	28.8457	28.7605	28.7636	29.0933	26274000	18335000	22921000	10204000	7529000	9196100	8	0.341484	-0.118996	Q53SS8;Q15365;F8VTZ0	Q53SS8;Q15365	Poly(rC)-binding protein 1	PCBP1
24.6773	24.8507	24.6292	24.7776	24.9885	24.7502	639390	372290	520550	173770	117150	76912	7	0.520953	-0.119699	A0A024R7L5;Q92900;A0A024R7L8;A0A059XG67;A0A059XBJ1;A0A059XAJ5;A0A059X4U2;A0A059XAL2;B3KY55;Q6ZUC8	A0A024R7L5;Q92900;A0A024R7L8	Regulator of nonsense transcripts 1	UPF1
28.5264	28.8351	29.0207	29.1192	29.0995	28.5226	7248900	7053800	9477700	4023800	2780600	1875100	19	0.188315	-0.119708	Q99959;B8QGS9;B4DR79;A0A087WXY2;B8QGS8	Q99959;B8QGS9	Plakophilin-2	PKP2
28.9039	27.1091	26.6979	27.0062	27.4757	28.5883	52265000	4616200	7030100	3455700	3552500	9154600	7	0.0499081	-0.11978	B4DF70;V9HW12;P32119;A6NIW5;A0A024R7F2	B4DF70;V9HW12;P32119;A6NIW5	Peroxiredoxin-2	PRDX2
23.9362	23.9907	23.9033	23.6233	24.7842	23.7833	928970	642060	588850	97406	54427	155880	3	0.120379	-0.120187	Q6MZE7;Q9Y6G9;C9JGM7;C9JLW1;B3KM42;E9PHI6;B4DDM4	Q6MZE7;Q9Y6G9	Cytoplasmic dynein 1 light intermediate chain 1	DKFZp686A1525;DYNC1LI1
32.8654	33.105	33.2255	33.1076	33.1193	33.3322	742190000	398630000	1080800000	354140000	277610000	223790000	16	0.398378	-0.121084	A0A0S2Z4G7;P06748;A0A0S2Z491;A0A140VJQ2;A4ZU86;Q9BTI9;Q9NX34;E5RI98;E5RGW4;V9HVU7;A0A024RAP1	A0A0S2Z4G7;P06748;A0A0S2Z491;A0A140VJQ2;A4ZU86;Q9BTI9	Nucleophosmin	NPM1
30.9178	31.2868	31.4749	31.3265	31.3425	31.3794	30949000	30238000	37121000	15348000	9965300	10820000	2	0.304482	-0.122955	P55265;A0A024DAK3;H0YCK3;D3DV75	P55265;A0A024DAK3;H0YCK3;D3DV75	Double-stranded RNA-specific adenosine deaminase	ADAR
26.4798	26.9518	26.9999	26.7924	26.9911	27.0175	5686600	6539400	7672900	2871300	2269300	2274300	8	0.273662	-0.123151	Q8NFH5;A8K3Z5;C9IYQ7;F8WCF5;F8WEL4;A8K0N6;C9JIY9;C9JWU7	Q8NFH5;A8K3Z5;C9IYQ7;F8WCF5;F8WEL4;A8K0N6	Nucleoporin NUP53	NUP35
27.6753	27.8676	27.9549	27.8994	28.1995	27.7745	12934000	12074000	14751000	4461400	4378100	3136600	11	0.343958	-0.125207	O95758;A0A024R163;X6R242;B1ALY4	O95758;A0A024R163	Polypyrimidine tract-binding protein 3	PTBP3
28.8711	29.1557	29.3474	29.244	29.2185	29.29	13161000	13002000	22920000	8620300	4127200	5331400	24	0.378205	-0.126079	Q9UBU9;E9PIN3;Q59E96;B4E227;B4E3J0;Q68CW9;E9PLA7;A0A024R5A9;H0YDU0;E9PMV7;E9PQA4	Q9UBU9;E9PIN3;Q59E96	Nuclear RNA export factor 1	NXF1
27.6265	27.7077	27.8757	27.6703	27.9465	27.9732	4299300	3726600	4147200	1518200	1176000	1281000	17	0.448895	-0.12673	Q8N163;B3KTJ9;G3V119;H0YB24;E5RHJ4;E2PSM9;E5RFJ3;H0YC69;E5RGU7;H0YC58;A0A087X2B6;E5RHH8	Q8N163;B3KTJ9;G3V119;H0YB24	DBIRD complex subunit KIAA1967	KIAA1967
30.0505	30.4593	30.6283	30.6949	30.4874	30.3367	14175000	13501000	16520000	7374000	4349700	4698000	54	0.251044	-0.126951	P07814;V9GYZ6;Q3KQZ8;B4DKX5;H6WCP5;B4DP50;V9GZ76	P07814;V9GYZ6;Q3KQZ8;B4DKX5;H6WCP5	Bifunctional glutamate/proline--tRNA ligase;Glutamate--tRNA ligase;Proline--tRNA ligase	EPRS
28.6857	28.8415	28.9016	29.1447	28.8588	28.8141	31943000	25388000	35627000	15026000	9794600	9381800	11	0.458987	-0.129609	B4E2V5;B4DZK8;P27105;A0A024R882;F8VSL7;B4E310	B4E2V5;B4DZK8;P27105;A0A024R882	Erythrocyte band 7 integral membrane protein	STOM
32.0984	32.3645	31.5886	31.8146	32.9988	31.6272	507560000	230110000	120200000	59584000	252330000	41273000	12	0.0953972	-0.129677	Qnocod	Qnocod
30.6388	31.0662	31.3617	31.0336	31.0157	31.4122	142540000	77791000	134440000	40453000	26466000	35296000	22	0.206442	-0.131598	P26599;A0A0U1RRM4;A6NLN1;Q59H49;K7EKJ7;A0A0D9SF20;K7ES59;K7EK45;A0A087WU68;K7EKX4;A0A087WUW5;K7ELW5	P26599;A0A0U1RRM4;A6NLN1;Q59H49	Polypyrimidine tract-binding protein 1	PTBP1
29.7402	30.0772	29.8815	30.1934	30.3057	29.5947	26596000	26149000	23967000	11939000	10126000	6516900	2	0.211501	-0.131646	Q9NVI7;Q5SV16	Q9NVI7	ATPase family AAA domain-containing protein 3A	ATAD3A
23.1187	23.2777	23.6126	23.6862	23.2755	23.4424	421040	360860	492420	89903	64530	173650	2	0.281929	-0.131709	Q92989;E9PL17	Q92989;E9PL17	Polyribonucleotide 5-hydroxyl-kinase Clp1	CLP1
23.52	23.8853	24.1822	24.2393	23.9117	23.8428	787080	589550	1003400	491870	139890	225470	1	0.234078	-0.135401	E9PH82;B4DT23;B4DY25;B3KTW4;I6L9E8;Q8NCA5	E9PH82;B4DT23;B4DY25;B3KTW4;I6L9E8;Q8NCA5	Protein FAM98A	FAM98A
27.0939	26.913	27.1068	27.228	27.2218	27.0717	8821400	6887400	7015900	2275000	1996300	1896600	12	0.775746	-0.135971	Q8TAD8;B1AK66;B4DLV6;B4DDK7;B4DUU3	Q8TAD8;B1AK66;B4DLV6;B4DDK7	Smad nuclear-interacting protein 1	SNIP1
26.2438	25.8834	26.5321	26.3655	26.4803	26.2273	10001000	5360500	10319000	3918900	2962100	2878000	4	0.274805	-0.137916	Q9Y3B4	Q9Y3B4	Pre-mRNA branch site protein p14	SF3B14
25.9054	26.0995	25.7184	26.0283	25.8308	26.2931	3481500	3090600	2611500	1516600	862270	1354300	3	0.34113	-0.14293	A8YXX5;A4FVA6;A0A024RD08;Q9NZJ7;A0A024RCX4;H0Y8C3;Q8IW90;Q9Y374	A8YXX5;A4FVA6;A0A024RD08;Q9NZJ7;A0A024RCX4;H0Y8C3;Q8IW90	Mitochondrial carrier homolog 1	PIG60;MTCH1
29.2322	29.4757	29.4827	29.6463	29.6001	29.3769	21096000	23171000	19154000	9252700	6600600	5554000	19	0.544627	-0.144242	Q9NZI8;D3DTW3	Q9NZI8;D3DTW3	Insulin-like growth factor 2 mRNA-binding protein 1	IGF2BP1
25.5952	24.9839	25.2375	25.3475	25.4286	25.4777	3305200	824530	1667500	734830	601390	373150	4	0.330997	-0.145723	O94905;E5RHW4;E5RJ09	O94905;E5RHW4	Erlin-2	ERLIN2
24.9239	25.1014	25.1272	25.4037	25.1973	24.9938	1339600	1799600	1881300	1187600	444870	466030	8	0.475506	-0.147415	Q12904;B4DNK3;D6R937	Q12904;B4DNK3	Aminoacyl tRNA synthase complex-interacting multifunctional protein 1;Endothelial monocyte-activating polypeptide 2	AIMP1
25.5345	25.5826	25.6089	26.2269	26.0011	24.9413	1453400	1132800	1205200	872440	586210	182430	0	0.137532	-0.147763	H0Y2W2	H0Y2W2		ATAD3A
27.589	27.9024	28.6333	28.3374	28.0657	28.1653	16910000	14527000	31120000	8970700	5915800	6821000	8	0.175621	-0.147898	Q8NFH3;B3KTT0;A0PJK4;Q8TEA6;B4E301;F5H0E3;B4DVD1	Q8NFH3;B3KTT0;A0PJK4	Nucleoporin Nup43	NUP43
23.6286	23.581	24.1924	23.7253	23.6459	24.4746	170210	153890	251240	18224	15363	0	4	0.169889	-0.147938	B4DK94;E9PH70;A0A1W2PPB7;Q9ULH0;H0Y8E4;B4DGY1;F8WAY8;H7C584;G1UI41;A0A1W2PPY4;Q7Z322	B4DK94;E9PH70;A0A1W2PPB7;Q9ULH0;H0Y8E4;B4DGY1	Kinase D-interacting substrate of 220 kDa	KIDINS220
24.563	24.3122	24.5926	24.6298	24.9442	24.34	713210	521570	599270	278790	380320	73440	2	0.309944	-0.148744	Q75MQ1;B3KTW0;B4DLA3;A0A0C4DGX4;Q13616;A0A090N7U0	Q75MQ1;B3KTW0;B4DLA3;A0A0C4DGX4;Q13616;A0A090N7U0	Cullin-1	CUL1
30.0216	29.9716	30.0989	30.1403	30.2	30.2008	54370000	38735000	38713000	18998000	12052000	14831000	24	1.62577	-0.1497	P61978;A0A024R228;B4DUQ1;Q5EC54;B4DFF1;Q5T6W2;B3KU16;S4R457;S4R359	P61978;A0A024R228;B4DUQ1;Q5EC54;B4DFF1;Q5T6W2	Heterogeneous nuclear ribonucleoprotein K	HNRNPK;HNRPK
23.9586	24.1246	24.2795	24.4047	23.7484	24.6616	1707500	1510200	1767100	0	323860	217520	0	0.202319	-0.150678	Q6ICH2;Q96AK3;B2CML4	Q6ICH2;Q96AK3;B2CML4	DNA dC->dU-editing enzyme APOBEC-3D	bK150C2.9;APOBEC3D;APOBEC3DE
30.0146	30.4506	30.4382	30.4701	30.5504	30.3365	19981000	18323000	24810000	11449000	8969800	7616000	31	0.410976	-0.151174	Q8N1F7;A8K897;H3BVG0;H3BM93;H3BV11;H3BRI8;H3BPA9;H3BNN5;H3BP95;H3BMX0;H3BVE2;H3BRD9;H3BV15	Q8N1F7;A8K897;H3BVG0	Nuclear pore complex protein Nup93	NUP93
26.1527	27.0536	27.1174	27.0732	26.8298	26.8839	1576000	1804400	1883400	833390	452810	446570	18	0.183852	-0.154352	B4E3H1;B4E3N7;O95425;A0A0J9YWY6;Q659E9;B4DXQ4;B4DZ11;Q63HL8	B4E3H1;B4E3N7;O95425;A0A0J9YWY6;Q659E9;B4DXQ4	Supervillin	SVIL;DKFZp586H1823
23.4773	23.5663	23.5661	23.6849	23.5887	23.8038	316960	253880	194130	104470	0	45203	3	1.06329	-0.15589	F8WCA5;E9PGM9;P78332;A8K6Q4;B4DNY1;B3KSK6	F8WCA5;E9PGM9;P78332;A8K6Q4	RNA-binding protein 6	RBM6
29.2734	29.5027	29.8516	29.7895	29.7193	29.5933	43215000	20718000	36222000	22629000	14135000	11680000	17	0.373057	-0.158143	Q86W42	Q86W42	THO complex subunit 6 homolog	THOC6
30.0721	30.4079	30.5822	30.4156	30.4629	30.6602	132800000	141220000	178920000	58159000	40835000	54155000	11	0.401906	-0.158827	P30050;Q59FI9;D3DS95;Q76P68	P30050;Q59FI9	60S ribosomal protein L12	RPL12
27.214	27.3663	27.3773	27.5599	27.3595	27.5147	6076100	4134300	5893900	3315500	1460100	1861500	7	0.923357	-0.158841	P08651;Q6FI30;B7Z4T6	P08651;Q6FI30;B7Z4T6	Nuclear factor 1 C-type;Nuclear factor 1	NFIC
25.5457	25.739	25.8887	26.0133	25.6285	26.0108	3862400	2846400	3784100	1906000	681390	1303700	5	0.420721	-0.159748	Q8NAV1;B2RDP2	Q8NAV1	Pre-mRNA-splicing factor 38A	PRPF38A
29.5232	29.8328	30.0288	29.8951	29.9618	30.0106	42786000	31677000	45828000	17472000	13697000	14084000	17	0.460272	-0.160891	U3KQC1;Q9BV38;A0A0A0MQU0;K7EIR0;K7EML4;U3KQK3;A0A087X237;K7EKX5	U3KQC1;Q9BV38;A0A0A0MQU0;K7EIR0	WD repeat-containing protein 18	WDR18
24.4262	24.0021	23.8825	24.0799	24.0702	24.6458	1238900	628730	548480	251160	174100	457880	3	0.255119	-0.161697	P23526;Q1RMG2	P23526;Q1RMG2	Adenosylhomocysteinase	AHCY
25.9079	26.2586	26.1846	26.1187	26.5396	26.1795	2484900	1991000	2385100	782470	630740	726380	9	0.406508	-0.162189	Q14244;B2R704;B7Z3Y3;B7Z3E1;B7ZB64;A0A087WZ40	Q14244;B2R704;B7Z3Y3;B7Z3E1;B7ZB64;A0A087WZ40	Ensconsin	MAP7
25.1749	25.4558	25.6453	25.5383	25.4505	25.7747	1319100	1288300	1253300	312260	240650	414890	8	0.412525	-0.162526	B3KRK2;Q9UJV9;J3KNN5;Q53HI2	B3KRK2;Q9UJV9;J3KNN5;Q53HI2	Probable ATP-dependent RNA helicase DDX41	DDX41
28.8613	28.7431	28.6814	28.6841	28.957	29.136	2840300	3632900	3875100	1335900	1100700	725460	6	0.506203	-0.163755	E7EVA0;H0Y2V1;H7C4C5;A0A024R2V0;F8W9U4;Q86Y04;P27816;B4DSQ1;Q8NDS5;B5MEG9	E7EVA0;H0Y2V1;H7C4C5;A0A024R2V0;F8W9U4;Q86Y04;P27816;B4DSQ1;Q8NDS5;B5MEG9	Microtubule-associated protein;Microtubule-associated protein 4	MAP4;DKFZp547H1810
27.236	27.8731	27.8781	27.8374	28.051	27.5904	5032100	5107800	6310200	2706800	2371400	1649400	16	0.259653	-0.163873	E9PQ61;B4DLG2;O75152;E9PBY7;Q0D2N5;A0A1W2PPR9;B4DYM8;A0A024R8H9;A0A1B0GTU1;A0A1B0GUI2	E9PQ61;B4DLG2;O75152;E9PBY7;Q0D2N5	Zinc finger CCCH domain-containing protein 11A	ZC3H11A
26.5282	27.3997	27.4154	27.1397	27.2414	27.4568	2581500	4108100	4712100	1511900	1111900	1141700	16	0.207248	-0.164858	Q13769;A0A024R1D6;F8WCP5;C9JXG5;H7C441;H7C072;C9JXU6;F5GZF3;C9JCL9	Q13769;A0A024R1D6;F8WCP5;C9JXG5	THO complex subunit 5 homolog	THOC5
28.97	29.4086	29.5517	29.5019	29.4367	29.4893	23845000	25183000	28424000	12467000	8135000	9027400	14	0.398344	-0.165862	Q6RFH5;E9PS41;B4E018;H0YFP2;F5H0Q8;F5GYL6	Q6RFH5;E9PS41	WD repeat-containing protein 74	WDR74
25.0005	25.296	25.8254	25.5015	25.4492	25.6697	3149800	4076400	4355300	2546200	1190500	1416000	4	0.265163	-0.166169	Q5JXM0;Q96B26	Q5JXM0;Q96B26	Exosome complex component RRP43	DKFZp564C0482;EXOSC8
29.4041	28.4491	28.5619	28.7466	28.733	29.4349	25980000	7649000	9898500	4359700	2857700	8154300	11	0.164991	-0.166524	B4DMA2;B4DGL0;P08238;A0A024RD80;Q9H6X9;A8K3W9;Q6PK50;Q58FF7;O14942;F8W026	B4DMA2;B4DGL0;P08238;A0A024RD80;Q9H6X9;A8K3W9	Heat shock protein HSP 90-beta	HSP90AB1
27.9261	28.1966	28.0352	28.3979	28.1968	28.0766	14068000	12249000	11290000	6083800	3741400	3349800	11	0.630218	-0.17114	Q8NBU5;B4E2J1	Q8NBU5;B4E2J1	ATPase family AAA domain-containing protein 1	ATAD1
28.9273	29.1601	29.3141	29.2308	29.3687	29.3186	19892000	17226000	21124000	8690900	5762200	7748200	25	0.652367	-0.172252	Q9Y230;B3KNL2;M0R0Y3;B4DW30;X6R2L4;M0QXI6;M0R0Z0;M0QXZ7;A0A1W2PS48	Q9Y230;B3KNL2;M0R0Y3	RuvB-like 2	RUVBL2
25.9609	26.3061	26.391	26.2455	26.402	26.5291	4805500	2026600	2269000	740260	739850	510560	5	0.484982	-0.172816	R9WQY1;A8MQB8;G3V0J0;X5D907;X5DQX7;Q06787;R9WPL0;A0A087WXI3;Q59GC1;R9WNI0;W5ZQ92;A0A0K0MJ24;Q8IXW7;A0A087WWR6;A0A087WY29;B4DFH8;B4DZ17;A0A087X1M7;Q8IUI9;A0A087WWU4	R9WQY1;A8MQB8;G3V0J0;X5D907;X5DQX7;Q06787;R9WPL0;A0A087WXI3;Q59GC1;R9WNI0;W5ZQ92;A0A0K0MJ24;Q8IXW7	Fragile X mental retardation protein 1	FMR1
25.4821	25.7091	25.4567	25.7609	25.8387	25.5817	8275600	5880600	4374300	2091700	2479900	2102600	3	0.737418	-0.177819	C9JC63;E7EVY0;S4R3Q9;Q15070;J3KNA0;Q2M1J6	C9JC63;E7EVY0;S4R3Q9;Q15070;J3KNA0;Q2M1J6	Mitochondrial inner membrane protein OXA1L	OXA1L
24.9336	24.8363	25.1981	25.8122	25.6034	24.0933	481720	660520	780840	499110	196980	87557	8	0.118947	-0.1803	Q14126	Q14126	Desmoglein-2	DSG2
30.6005	30.8662	31.4721	31.1706	31.0208	31.2941	106490000	94350000	157690000	50972000	36555000	41800000	21	0.270547	-0.182222	Q15717;M0QZR9;M0R055;B7Z5E0;Q12926;B1APY9;P26378;B1APY8;A0A0A0MRX1;A0A0R4J2E6;B1AM48	Q15717;M0QZR9	ELAV-like protein 1	ELAVL1
23.0788	23.438	23.2973	23.6324	23.1868	23.544	219060	259260	311720	0	81967	0	3	0.460446	-0.183053	S4R403;B3KSA6;B7ZB07;Q9Y2D8;B3KMF4;C9JIX7	S4R403;B3KSA6;B7ZB07;Q9Y2D8;B3KMF4	Afadin- and alpha-actinin-binding protein	SSX2IP
23.4793	23.6742	23.5363	23.7235	23.7154	23.8002	197460	171360	177860	86806	0	39377	2	1.341	-0.183104	A1L390;G3V3I3;G3V278;A0A0U1RR71;G3V311	A1L390;G3V3I3;G3V278;A0A0U1RR71;G3V311	Pleckstrin homology domain-containing family G member 3	PLEKHG3
25.7127	26.0248	26.3885	25.9613	26.1738	26.541	1636500	1872400	3142600	656720	571860	898320	9	0.286339	-0.183362	H7C3A1;Q9BXP5;Q7Z4Y3;H7C1K0	H7C3A1;Q9BXP5	Serrate RNA effector molecule homolog	SRRT
32.1133	32.3644	32.4757	32.6381	32.4696	32.401	302050000	227750000	328010000	144260000	105310000	105740000	19	0.652696	-0.185066	Q96BS4;P22087;M0QXL5;M0R299;M0R2Q4;B4DLD4;M0R0P1;M0R2U2;M0R1H0;M0R2B0	Q96BS4;P22087;M0QXL5;M0R299;M0R2Q4;B4DLD4;M0R0P1	rRNA 2-O-methyltransferase fibrillarin	FBL
30.8163	30.7478	30.7446	31.1083	30.728	31.0331	117400000	77512000	84997000	47508000	28324000	36905000	21	0.720818	-0.18689	P21796;A0A1L1UHR1;B3KTS5;C9JI87;B4DEI3	P21796;A0A1L1UHR1;B3KTS5;C9JI87	Voltage-dependent anion-selective channel protein 1	VDAC1
25.8146	25.0999	24.434	25.1909	25.2713	25.4498	3655600	1185200	834850	602340	679770	582890	6	0.175465	-0.187821	H3BRG4;P22695;H3BSJ9;H3BP04;A0A087WVZ4;H3BUE4;H3BUI9	H3BRG4;P22695;H3BSJ9	Cytochrome b-c1 complex subunit 2, mitochondrial	UQCRC2
29.5571	29.73	29.6083	29.3331	30.1289	30.002	48328000	49461000	44718000	13867000	19132000	20955000	19	0.306266	-0.189529	Q99848;Q6IB29;H7C2Q8;B4DHA6;B4DRX8	Q99848;Q6IB29;H7C2Q8	Probable rRNA-processing protein EBP2	EBNA1BP2
24.0408	23.5152	23.5134	23.3456	23.5494	24.7433	710600	349620	239010	81454	0	199660	4	0.150425	-0.189596	Q13263;B2R8R5;M0R0K9;M0R2I3	Q13263;B2R8R5;M0R0K9	Transcription intermediary factor 1-beta	TRIM28
25.9061	26.0954	26.468	26.5499	26.2844	26.2067	761150	1226300	1727100	721690	297610	266070	12	0.415712	-0.190522	A8K5D9;Q9NQW6;A0A024RA49;B4DSL6;H7C3S1;H7C1K5;C9JJT6	A8K5D9;Q9NQW6;A0A024RA49;B4DSL6	Actin-binding protein anillin	ANLN
27.6412	27.8557	28.0974	28.0185	28.0279	28.1223	12825000	10746000	13290000	5223100	4143900	4873200	1	0.635283	-0.191481	F5GWA4	F5GWA4		KCTD10
28.7878	29.3384	29.3631	29.3134	29.4508	29.3033	11253000	11133000	12876000	5212700	3794100	3886000	25	0.424718	-0.192724	Q96KR1;B2RNR6;A8K849;H0Y8W1;B3KVS4;B3KP82;Q05D65	Q96KR1;B2RNR6;A8K849	Zinc finger RNA-binding protein	ZFR
28.929	29.1329	28.9197	29.3615	29.2942	28.9067	23016000	21780000	22536000	13461000	8502400	6831600	15	0.541613	-0.193599	Q96EE3;K7ELV2;K7EP88;K7ENI5;K7EPZ5	Q96EE3;K7ELV2;K7EP88;K7ENI5	Nucleoporin SEH1	SEH1L
25.4404	25.8754	25.7174	26.1045	25.7555	25.7544	1248100	1019400	1011700	257880	286610	145940	10	0.489247	-0.193715	Q92974;D3DVA5;V9GYM8;B4DJ49;B7Z977;V9GYF5;V9GYG5;V9GZ14;Q5VY93;V9GZ58;V9GYF0	Q92974;D3DVA5;V9GYM8;B4DJ49;B7Z977;V9GYF5;V9GYG5;V9GZ14	Rho guanine nucleotide exchange factor 2	ARHGEF2
25.5206	25.8346	25.8027	25.8174	25.9304	26.0089	1842300	2630100	2126900	1481700	709050	760290	8	0.808322	-0.199614	P63092;A0A0S2Z3H8;Q5JWF2;B0AZR9;Q5FWY2;A0A0S2Z3S5;Q14455;A0A0A0MR13;S4R3E3;O60726;Q5JWE9;Q5JWD1;H0Y7E8;S4R3V9;H0Y7F4;Q8N2B4;P38405;A8K1Y9;O75633;O75632;B4DHG7	P63092;A0A0S2Z3H8;Q5JWF2;B0AZR9;Q5FWY2;A0A0S2Z3S5;Q14455	Guanine nucleotide-binding protein G(s) subunit alpha isoforms short;Guanine nucleotide-binding protein G(s) subunit alpha isoforms XLas	GNAS;GSA
28.553	28.837	29.1177	28.6363	29.3642	29.1153	60853000	54466000	64413000	20413000	22155000	25406000	5	0.307552	-0.202721	J3KP15;Q53FN0;Q01130;A0A024R8U5;J3QL05;Q8NAK9;B3KX15;Q6NXQ0;Q8N220;B3KVY2;B3KUF7;B3KUY1;A4D2F6	J3KP15;Q53FN0;Q01130;A0A024R8U5;J3QL05;Q8NAK9;B3KX15;Q6NXQ0;Q8N220;B3KVY2;B3KUF7;B3KUY1	Serine/arginine-rich splicing factor 2	SRSF2;SFRS2
30.6987	30.901	31.2601	30.794	31.0598	31.6171	268210000	253110000	334470000	124900000	99483000	145460000	15	0.279874	-0.203716	P62750;H7BY10;K7ERT8;A8MUS3;K7EJV9;K7EMA7;Q53RC5;B9EJE3;O95014	P62750;H7BY10;K7ERT8;A8MUS3;K7EJV9;K7EMA7	60S ribosomal protein L23a	RPL23A
26.6246	26.8734	27.2468	27.2255	27.1436	26.9928	3787700	4201200	6356600	2437800	1740900	1727200	10	0.459571	-0.205694	Q9NW64;E5RJW4;E5RHA8	Q9NW64;E5RJW4	Pre-mRNA-splicing factor RBM22	RBM22
26.8737	27.2939	27.7731	27.5341	27.4447	27.5868	12750000	10970000	18622000	7909500	3812600	5839300	6	0.325234	-0.20827	Q9NPD3;E9PPI9;E9PI41	Q9NPD3;E9PPI9;E9PI41	Exosome complex component RRP41	EXOSC4
29.2778	29.562	29.5238	29.6463	29.7673	29.5759	10479000	9444300	11448000	4772900	3678900	3212800	43	0.927018	-0.208576	Q9UQE7;Q86VX4;B0AZQ4	Q9UQE7;Q86VX4;B0AZQ4	Structural maintenance of chromosomes protein 3	SMC3
26.1907	26.4336	26.7087	26.5544	26.5709	26.8336	3030400	2463300	3806000	1364700	908430	1183300	9	0.524747	-0.208649	Q8IXI1;H3BST5;I3L2C6;H3BU27;H3BMP9;H3BVI5;H3BUX4	Q8IXI1;H3BST5;I3L2C6	Mitochondrial Rho GTPase 2	RHOT2
25.6725	25.5543	25.9023	25.9796	25.9759	25.8035	4535800	3121700	3932000	1923800	1399700	1398200	4	0.828153	-0.209951	Q9Y6A4;B4DN94	Q9Y6A4;B4DN94	UPF0468 protein C16orf80	C16orf80
25.9153	25.9013	26.13	25.8745	26.4653	26.2374	3403600	1823100	3123400	873880	548520	422450	11	0.488715	-0.210186	Q9P258;A0A024RAC5;A5PLK7	Q9P258;A0A024RAC5;A5PLK7	Protein RCC2	RCC2
26.3206	26.8283	26.8382	26.6137	26.9602	27.0464	4559200	4771800	5415300	1820600	1272700	1375600	8	0.415671	-0.211075	P35659;B4DNW3;B4DFG0;D6RDA2;D6R9L5;H0Y993;Q6MZJ9;H0Y8X0	P35659;B4DNW3;B4DFG0;D6RDA2;D6R9L5	Protein DEK	DEK
28.7237	29.076	28.899	29.0957	29.1366	29.101	9595800	9661700	8797700	6174600	3918000	4202500	23	0.966594	-0.211524	Q13523;A0A024QZY5;B4DZQ5;H0YDJ3;Q15456;D3DWH5	Q13523;A0A024QZY5;B4DZQ5;H0YDJ3	Serine/threonine-protein kinase PRP4 homolog	PRPF4B
25.8822	26.0837	26.1303	26.3133	26.201	26.2246	2245500	1868000	2313900	780490	658310	647050	7	1.20612	-0.214184	O43263;P78563;Q86XN4	O43263;P78563	Double-stranded RNA-specific editase 1	hRED1;ADARB1
25.3889	24.4749	25.0196	24.8281	25.2661	25.4348	2933600	1098300	1562400	799890	676100	886560	3	0.267966	-0.215177	Q6PKC2;Q86Y74;O95232;A8K3C5;J3KPP4;B4DJ96;E7EN55;C9JL41;D6RDI2	Q6PKC2;Q86Y74;O95232;A8K3C5;J3KPP4;B4DJ96	Luc7-like protein 3	CROP;LUC7L3
27.5856	27.9798	28.0801	28.2181	28.0213	28.0583	6340000	4943800	5916100	2073500	1844600	2205000	17	0.598367	-0.217391	E7ET15;O15042;E7EW00;H0Y8D9;B4DK81;C9JDJ7;C9J5L1;U3KPT1;H7C4V2	E7ET15;O15042;E7EW00;H0Y8D9;B4DK81	U2 snRNP-associated SURP motif-containing protein	U2SURP
24.8722	24.3805	24.2341	24.5429	24.3774	25.2204	2007900	2562800	679300	471820	0	1624900	3	0.271116	-0.217991	H0YHC3;F8W020;F8W118;F8VXI6;F8VUX1;F8VY35;F8VV59;B7Z9C2;A0A024RBE6;F8W0J6;F5H4R6;B7Z2V4;H0YIV4;P55209;A0A024RBB7;F8VRJ2;B7Z5H0;H0YH88;F8W543;E9PNW0;E9PJJ2;E9PS34;E9PNJ7;A8MXH2;F8VVB5;E9PKT8;C9J6D1;C9JZI7;Q99733;A0A024RCC9;B7ZAK9;B7ZB83;B7ZAC7;B4DS05	H0YHC3;F8W020;F8W118;F8VXI6;F8VUX1;F8VY35;F8VV59;B7Z9C2;A0A024RBE6;F8W0J6;F5H4R6;B7Z2V4;H0YIV4;P55209;A0A024RBB7;F8VRJ2;B7Z5H0;H0YH88;F8W543	Nucleosome assembly protein 1-like 1	NAP1L1
25.7726	26.0095	26.3142	26.1533	26.3519	26.2456	5442200	3601100	6220500	1457300	1733300	1490700	4	0.582832	-0.21815	Q8NDX6	Q8NDX6	Zinc finger protein 740	ZNF740
26.0901	26.663	26.8169	26.8424	26.8483	26.5365	620940	738060	927930	419000	222310	221610	13	0.376877	-0.21908	Q9BY89	Q9BY89	Uncharacterized protein KIAA1671	KIAA1671
25.7822	24.1013	24.4986	23.7047	23.9763	27.3669	5924800	785620	1025800	412530	129390	4851900	4	0.0599667	-0.221938	Q6FHN3;P22392;Q32Q12;O60361;E7ERL0;P15531;J3KPD9;C9K028;F6XY72;E5RHP0	Q6FHN3;P22392;Q32Q12;O60361;E7ERL0;P15531;J3KPD9	Nucleoside diphosphate kinase;Nucleoside diphosphate kinase B;Putative nucleoside diphosphate kinase;Nucleoside diphosphate kinase A	NME2;NME1-NME2;NME2P1;NME1
26.1445	26.3837	26.4071	26.746	26.1133	26.7445	2410600	2336700	2895600	1304000	430270	531010	6	0.418593	-0.222801	P49756;E9PQU5	P49756;E9PQU5	RNA-binding protein 25	RBM25
26.1109	26.5265	26.4964	26.6223	26.482	26.6994	2438700	2573100	2375200	1124800	468010	623740	8	0.685479	-0.223263	E9PKP7;P17480;A8K962;B4DNQ1;Q05BZ1;O00164;B4DLB0;Q9BQR2;E9PMM2;E9PLT2	E9PKP7;P17480;A8K962;B4DNQ1;Q05BZ1;O00164;B4DLB0	Nucleolar transcription factor 1	UBTF
25.5994	25.9543	25.8059	25.8968	26.1158	26.0223	1578200	1849100	1541300	405460	370210	273230	9	0.866034	-0.22508	Q9BW19;A0A1U9X7Y0;A0A024RCS7;B4DMA8;B4E063;A0A1U9X7X5;A0A087X1W5	Q9BW19;A0A1U9X7Y0;A0A024RCS7;B4DMA8;B4E063;A0A1U9X7X5	Kinesin-like protein KIFC1	KIFC1
33.4668	33.6385	33.9023	33.8984	33.9096	33.8765	41133000	34251000	46626000	21063000	14928000	13983000	247	0.822809	-0.225578	Q15149;D3DWL0;Q96IE3;E9PMV1;E9PKG0;H0YDN1;E9PQ28;E9PIA2;Q9UPN3;H3BPE1;H3BQK9	Q15149;D3DWL0	Plectin	PLEC;PLEC1
25.2311	25.318	25.521	25.604	25.4035	25.7479	1714400	1362200	1740500	692970	492320	437270	5	0.801592	-0.22842	P83111;H0YNN5	P83111;H0YNN5	Serine beta-lactamase-like protein LACTB, mitochondrial	LACTB
33.2675	33.8001	34.4386	33.7325	33.9261	34.534	594460000	517980000	970230000	314430000	275330000	419940000	32	0.213629	-0.228786	P09651;A0A024RAZ7;F8W6I7;A0A024RB53;Q6IPF2;A0A024RC46;Q9BSM5;Q0VAC0;F8VZ49;F8VTQ5;Q32P51;A0A024QZ98;B4E0B5;B4DP35;F8W646;F8VYN5;H0YH80;Q3MI39	P09651;A0A024RAZ7;F8W6I7;A0A024RB53;Q6IPF2;A0A024RC46;Q9BSM5;Q0VAC0;F8VZ49;F8VTQ5;Q32P51;A0A024QZ98;B4E0B5;B4DP35	Heterogeneous nuclear ribonucleoprotein A1;Heterogeneous nuclear ribonucleoprotein A1-like 2	HNRNPA1;HNRPA1;HNRNPA1L2
30.7813	29.9937	30.0619	30.2445	30.4178	30.8628	127320000	49742000	53810000	18230000	20267000	35037000	20	0.298373	-0.229386	V9HVZ4;P04406;E7EUT5;Q2TSD0;Q0QET7;A4UCT1;B4DRV9;Q5ZEY3;Q16768;O14556;A0A0K0K1K1	V9HVZ4;P04406;E7EUT5;Q2TSD0;Q0QET7;A4UCT1;B4DRV9	Glyceraldehyde-3-phosphate dehydrogenase	GAPDH
25.7316	25.2967	25.5579	25.8012	24.9146	26.5646	8065100	4276400	5737600	2724500	693730	4525200	3	0.178202	-0.231364	P98179;A0A024QYX3	P98179;A0A024QYX3	Putative RNA-binding protein 3	RBM3
25.3519	25.6759	25.839	25.7145	25.452	26.3946	1336100	1080300	1232100	492810	211350	450790	10	0.29797	-0.231446	Q53FG5;P33992;B1AHB0;A8K521;B4DVK5;B4DQ39;B1AHB1;B3KVF0;Q59F49;B1AHB2;B1AHA9	Q53FG5;P33992;B1AHB0;A8K521;B4DVK5;B4DQ39;B1AHB1;B3KVF0;Q59F49	DNA replication licensing factor MCM5	MCM5
29.474	29.6698	29.7489	29.5494	29.9244	30.114	54740000	41359000	56688000	21585000	18440000	24393000	10	0.555092	-0.231653	A0A024RDF4;Q14103;A0A024RDF3;H0Y8G5;H0YA96;D6RAF8;Q12771;B4DTC3;A0A024RDB4;D6RF44;D6RD83;D6RBQ9;B4E0W4	A0A024RDF4;Q14103;A0A024RDF3;H0Y8G5;H0YA96;D6RAF8;Q12771;B4DTC3;A0A024RDB4;D6RF44	Heterogeneous nuclear ribonucleoprotein D0	HNRNPD
24.6366	24.9419	24.7994	24.897	25.1302	25.0467	781910	1389300	799380	855950	714600	643720	3	0.975137	-0.232021	Q8N5F7;Q05D22;A0PJ73;Q5M9Q1	Q8N5F7	NF-kappa-B-activating protein	NKAP
27.4502	27.8628	28.1701	28.1953	27.9992	27.998	20420000	19013000	28255000	12384000	8982500	6277800	8	0.46815	-0.23646	C9JLU1;P52434	C9JLU1;P52434	DNA-directed RNA polymerases I, II, and III subunit RPABC3	POLR2H
26.1202	26.743	26.8599	26.8647	26.7473	26.8301	3799500	3800100	5605700	1948200	1137500	1949000	7	0.443206	-0.239625	B4DNL1;Q9BV37;Q53FW9;Q13610;A0A024RBH5;B4DJV5;Q86X79;Q05BL3;Q6PKI5;Q6PIN4	B4DNL1;Q9BV37;Q53FW9;Q13610;A0A024RBH5;B4DJV5	Periodic tryptophan protein 1 homolog	PWP1
24.4052	24.9115	25.1123	24.9218	25.306	24.9221	2440300	2292800	3113100	1273000	1284800	997820	3	0.4153	-0.240339	H0YLG5;B3KUI4;Q96TC7;A0A024R9P6;H0YNE5;H0YMB1	H0YLG5;B3KUI4;Q96TC7;A0A024R9P6;H0YNE5	Regulator of microtubule dynamics protein 3	RMDN3
30.9115	31.0982	31.4137	31.2651	31.3587	31.5254	56167000	44940000	71421000	26595000	20500000	27894000	36	0.663982	-0.241922	P20700;E9PBF6;B4DZT3;Q6DC98;A0A0D9SFE5;A0A0D9SFY5	P20700;E9PBF6;B4DZT3;Q6DC98;A0A0D9SFE5	Lamin-B1	LMNB1
26.834	27.1923	27.2715	27.4045	26.9324	27.6897	4990100	4578700	6136900	2911200	1321600	2304100	12	0.397117	-0.242905	P49711;B3KSE4;V9GY73;A6XGM9;Q8NI51;B2RA05;F5H2V8;A6XGM5	P49711	Transcriptional repressor CTCF	CTCF
29.1415	29.3974	29.4337	29.5221	29.7074	29.4748	8209600	7888300	8686400	3854000	3074000	2419300	39	0.984669	-0.243946	Q14683;G8JLG1;Q6P2R1;A8K7A6;Q6MZR8;B7Z709;Q68EN4;H0Y7K8;Q5H934;Q7Z4C6;V9GY57;V9GYN9	Q14683;G8JLG1;Q6P2R1;A8K7A6;Q6MZR8;B7Z709	Structural maintenance of chromosomes protein 1A	SMC1A;DKFZp686L19178
29.8166	30.0621	29.9239	30.3143	30.4217	29.8008	14016000	11766000	11615000	6922000	5615700	3643400	4	0.52695	-0.244722	P18583;D3DSF7	P18583	Protein SON	SON
25.2813	23.7941	23.911	24.0367	24.2207	25.4697	1981300	309630	440270	112960	51288	330620	8	0.139172	-0.246902	P17987;F5H282;E7EQR6;E7ERF2;F5GZ03;F5GYL4;F5GZI8	P17987;F5H282;E7EQR6;E7ERF2	T-complex protein 1 subunit alpha	TCP1
24.9216	25.1712	25.402	25.8367	25.4704	24.9316	1592200	1827600	2000100	1304800	714260	248460	5	0.345784	-0.247978	Q68CX8;A8KAQ6;B4E3W1;Q9Y679	Q68CX8;A8KAQ6;B4E3W1;Q9Y679	Ancient ubiquitous protein 1	DKFZp686P12272;AUP1
23.8555	24.5234	24.7049	24.8059	24.5287	24.4935	1811700	2346300	2962000	1307200	713320	749520	3	0.376398	-0.248091	F5GYV5;H7BZV4;A0A0C4DG62;F8WCT1;Q66PJ3;Q8TEM4;F8WEP2;A0A0C4DH18;B2RE15;F5H7X4	F5GYV5;H7BZV4;A0A0C4DG62;F8WCT1;Q66PJ3;Q8TEM4;F8WEP2;A0A0C4DH18;B2RE15	ADP-ribosylation factor-like protein 6-interacting protein 4	ARL6IP4;FLJ00169
31.3804	26.6979	26.8776	28.1961	28.1287	29.3831	112150000	3183300	2692900	3847700	1952600	6225000	30	0.0545397	-0.250706	Q8WVV4	Q8WVV4	Protein POF1B	POF1B
27.1693	26.1694	26.3106	26.4729	26.0542	27.8764	1354300	400640	743290	237130	87378	531430	22	0.147668	-0.251368	A0A0U1RQF0;P49327;Q6PJJ3;J3KTF0;A0A0U1RRG3	A0A0U1RQF0;P49327	Fatty acid synthase;[Acyl-carrier-protein] S-acetyltransferase;[Acyl-carrier-protein] S-malonyltransferase;3-oxoacyl-[acyl-carrier-protein] synthase;3-oxoacyl-[acyl-carrier-protein] reductase;3-hydroxyacyl-[acyl-carrier-protein] dehydratase;Enoyl-[acyl-carrier-protein] reductase;Oleoyl-[acyl-carrier-protein] hydrolase	FASN
30.9891	31.3082	31.4422	31.5254	31.5186	31.4499	182570000	150160000	203700000	94021000	75556000	66958000	21	0.855833	-0.251448	Q13151	Q13151	Heterogeneous nuclear ribonucleoprotein A0	HNRNPA0
25.6021	26.1616	26.2483	26.2777	26.1202	26.3724	3030000	2997200	2617200	1746500	814680	1044600	6	0.514593	-0.252782	Q9H6Y2;G3V1J0;B4DE13;D6RGJ8	Q9H6Y2;G3V1J0	WD repeat-containing protein 55	WDR55
26.3567	26.3164	26.5766	26.4697	26.4836	27.0565	7539100	5059700	6964200	2514300	1459100	3099500	4	0.532847	-0.25337	Q53GB2;P55735;A8MXL6;Q59FA6;A0A0C4DFR6;A4UCS7;A8MWR8;E7ERC8	Q53GB2;P55735;A8MXL6;Q59FA6;A0A0C4DFR6;A4UCS7;A8MWR8	Protein SEC13 homolog	SEC13
28.4677	28.7324	28.9488	28.7626	29.0116	29.1379	25962000	20228000	29859000	10465000	8331100	7739600	12	0.64763	-0.254389	Q5T081;P18754;A0A0S2Z3I4;A0A0S2Z404;C9JW69;C9JRH2;C9JMJ4;C9J3R0;C9JQZ4	Q5T081;P18754;A0A0S2Z3I4;A0A0S2Z404;C9JW69;C9JRH2;C9JMJ4;C9J3R0;C9JQZ4	Regulator of chromosome condensation	RCC1
32.3472	32.6305	32.4698	32.1959	33.0347	32.9874	242310000	201660000	182610000	63941000	93487000	95405000	11	0.379643	-0.256818	P38159;H3BT71;B4E352;H0Y6E7;B3KRG5;H3BUY5;H3BR27;O75526;A8K8A6;H3BNC1	P38159;H3BT71;B4E352;H0Y6E7;B3KRG5;H3BUY5	RNA-binding motif protein, X chromosome;RNA-binding motif protein, X chromosome, N-terminally processed	RBMX
25.535	25.6036	25.818	26.2354	25.9315	25.561	1932600	1320400	1714900	423150	501910	436750	9	0.532379	-0.257086	Q02040;X6RAJ1;Q05DA9	Q02040;X6RAJ1;Q05DA9	A-kinase anchor protein 17A	AKAP17A;SFRS17A
23.0565	23.4232	23.1855	22.4792	23.8858	24.0755	318940	306520	298590	0	0	0	2	0.19249	-0.258486	B8XCX7;Q9H2F5;B8XCX8	B8XCX7;Q9H2F5;B8XCX8	Enhancer of polycomb homolog 1	EPC1
28.8617	29.4887	29.6949	29.248	29.4825	30.0911	77057000	77006000	101810000	22972000	29497000	48010000	2	0.295584	-0.258715	Q16778;P33778;P23527;P06899;A0A024RCJ2;Q8N257;Q6DRA6;Q6DN03;Q96A08;L0R4T3	Q16778;P33778;P23527;P06899;A0A024RCJ2;Q8N257;Q6DRA6;Q6DN03	Histone H2B type 2-E;Histone H2B type 1-B;Histone H2B type 1-O;Histone H2B type 1-J;Histone H2B type 3-B;Putative histone H2B type 2-D;Putative histone H2B type 2-C	HIST2H2BE;HIST1H2BB;HIST1H2BO;HIST1H2BJ;HIST3H2BB;HIST2H2BD;HIST2H2BC
27.6072	27.0141	27.251	27.4548	27.4749	27.7204	1838100	491450	1029300	422760	312390	411470	31	0.603836	-0.259274	O75369;A0A024R321;Q68CT4;E7EN95;H7C5L4;A0A0A0MT44;A0A0C4DGA1	O75369;A0A024R321;Q68CT4;E7EN95	Filamin-B	FLNB;DKFZp686A1668
26.926	27.2589	27.0272	27.5244	27.5041	26.962	2933000	1881200	1931500	1147900	813990	427030	0	0.54978	-0.259487	O00411;K7EMH3	O00411	DNA-directed RNA polymerase, mitochondrial	POLRMT
24.6702	25.0207	25.0335	25.1076	25.1291	25.2711	483860	720560	732610	320100	185410	292330	6	0.942492	-0.261165	A0A0S2Z5K8;V9HWK4;Q96SI9;H0YC91	A0A0S2Z5K8;V9HWK4;Q96SI9	Spermatid perinuclear RNA-binding protein	STRBP
29.3385	29.6143	30.1067	29.8895	29.8084	30.1602	43573000	33215000	61267000	23624000	13416000	15944000	16	0.462606	-0.266135	B4DY09;Q12905;F4ZW62;Q53FG3;F4ZW63;X6R6Z1;A0A0A0MRL0	B4DY09;Q12905;F4ZW62;Q53FG3;F4ZW63	Interleukin enhancer-binding factor 2	ILF2
25.8779	26.0742	26.335	26.1402	26.4031	26.5459	1708400	1639500	4282700	888990	757610	790870	6	0.683541	-0.26738	P46060;A0A024R1U0;B4E0U0;B4DY16;Q9BSK3;H0Y4Q3;B0QYT6;Q8WUS7;B0QYT5;B0QYT4	P46060;A0A024R1U0;B4E0U0;B4DY16	Ran GTPase-activating protein 1	RANGAP1
32.1909	28.0111	27.6594	29.4451	29.9205	29.3063	51864000	22594000	13374000	11197000	46771000	22735000	0	0.064051	-0.270151	V9HW68;Q6MZV7;Q6N096;Q6N089;P01857;Q6PYX1;A0A0A0MS08;P0DOX5;Q6GMX6;A8K008;Q6MZQ6;Q5EFE5;Q6N094;Q6N097;Q7Z351;Q6N095;A0A0A0MS07;S6AWD9;S6BGE5;A2J1N2;A2NWX3;A0A068LKS6;Q9HCC1;Q0ZCH4;P01780;P01763;P01762;A0A0B4J1V1;Q9UL91;Q0ZCI1;Q0ZCJ4;A2NYQ9;Q0ZCJ5;Q0ZCH9;Q0ZCJ2;Q0ZCI8;Q0ZCJ0;A0A068LKR7;A0A0X9USM3;A4F255	V9HW68;Q6MZV7;Q6N096;Q6N089;P01857;Q6PYX1;A0A0A0MS08;P0DOX5;Q6GMX6;A8K008;Q6MZQ6;Q5EFE5;Q6N094;Q6N097;Q7Z351;Q6N095;A0A0A0MS07	Ig gamma-1 chain C region	DKFZp686C11235;DKFZp686I15196;DKFZp686P15220;IGHG1;IGH@;DKFZp686G11190;DKFZp686O01196;DKFZp686H20196;DKFZp686N02209;DKFZp686K03196
29.6727	29.9514	30.0894	29.9365	30.2149	30.3759	15700000	13562000	17005000	7801500	7056900	7594500	36	0.696501	-0.271227	P09874;A0A024R3T8;B4E0E1;B2R5W3;Q05D33;Q6PJL0;Q96P95;Q5VX84;Q5VX85	P09874;A0A024R3T8;B4E0E1;B2R5W3	Poly [ADP-ribose] polymerase 1	PARP1
31.2526	31.536	32.027	31.6315	31.8993	32.0999	278720000	207900000	357320000	122020000	91726000	138260000	11	0.442234	-0.27169	Q16629;A0A0B4J1Z1;B4DEK2;C9JAB2;Q8NB80;F8WEA1;H7BZZ6	Q16629;A0A0B4J1Z1;B4DEK2;C9JAB2;Q8NB80	Serine/arginine-rich splicing factor 7	SRSF7
27.2503	26.7569	27.0038	27.5912	27.0005	27.2403	10841000	4432200	7386700	4319900	2030900	2811900	6	0.542101	-0.273656	Q8NE86;S4R468;B4DWD0	Q8NE86;S4R468	Calcium uniporter protein, mitochondrial	MCU
26.7665	26.7176	27.1017	26.9859	27.1166	27.3055	10033000	6802900	10427000	2247500	3011400	2934300	8	0.835062	-0.274059	Q8NFH4;B4DKV8;F8VTY2	Q8NFH4;B4DKV8;F8VTY2	Nucleoporin Nup37	NUP37
27.932	28.1921	28.1495	28.2217	28.362	28.5208	7609100	6720600	7962300	2621500	2688100	2402200	24	1.10265	-0.276974	Q03252;A0A0A7M1X5	Q03252;A0A0A7M1X5	Lamin-B2	LMNB2
23.752	24.2615	24.2289	25.2639	24.3624	23.4528	267270	251920	364170	476820	229150	64428	4	0.195414	-0.278916	Q14145;A0A024R7C0;K7EJ49;K7EJD8;K7ESE0;K7EQX2	Q14145;A0A024R7C0;K7EJ49;K7EJD8;K7ESE0	Kelch-like ECH-associated protein 1	KEAP1
27.0407	27.0232	26.932	27.0875	27.3915	27.3607	9523200	6569200	6555300	2275500	1752000	1902700	7	1.28881	-0.281257	O75477;D3DR65;B2RDK6;B4DPN7;B0QZ43	O75477;D3DR65;B2RDK6;B4DPN7	Erlin-1	ERLIN1;SPFH1
25.6494	26.0009	26.0483	26.0548	26.0988	26.3893	3392700	4232700	3401200	1925400	937450	1462900	6	0.793265	-0.281441	Q3B726	Q3B726	DNA-directed RNA polymerase I subunit RPA43	TWISTNB
25.0351	24.9014	25.0803	25.4536	25.012	25.3971	819610	614030	1315900	566220	341040	423780	3	0.882994	-0.281974	J3KMX2;B9EGA3;Q92925;J3QWB6	J3KMX2;B9EGA3;Q92925;J3QWB6	SWI/SNF-related matrix-associated actin-dependent regulator of chromatin subfamily D member 2	SMARCD2
23.9121	24.0505	24.0912	24.3627	24.2582	24.2816	1504500	855680	751780	507020	203550	217160	5	1.96734	-0.282905	Q9H936;K4DIB8;K4DIA8;A0A0D9SEI9;A0A0D9SFE1;A0A024RCA6;E9PJH7;A0A0D9SFA8;K4DIB0;K4DIA2;A0A0D9SG84;E9PI74;E9PQ36;K4DIB6;K4DIB3;E9PS95;Q9H1K4;A0A024R0W0;K4DIB4;E9PJY0;A0A0A6YYN8	Q9H936;K4DIB8;K4DIA8;A0A0D9SEI9;A0A0D9SFE1;A0A024RCA6;E9PJH7;A0A0D9SFA8;K4DIB0;K4DIA2;A0A0D9SG84;E9PI74;E9PQ36;K4DIB6;K4DIB3;E9PS95	Mitochondrial glutamate carrier 1	SLC25A22
26.7813	27.1336	26.9539	27.0755	27.4119	27.2327	33338000	35821000	34838000	17776000	15760000	14185000	3	0.943656	-0.28376	P62306;A0A0B4J254;F8W0W6	P62306	Small nuclear ribonucleoprotein F	SNRPF
26.3089	26.0984	26.5297	26.3384	26.6362	26.8145	7230100	4163800	6082400	2637200	2262900	2723700	4	0.693696	-0.284027	Q86U42;B4DEH8;G3V4T2;H0YJH9	Q86U42;B4DEH8;G3V4T2;H0YJH9	Polyadenylate-binding protein 2	PABPN1
31.8512	32.0929	32.4736	32.2619	32.6403	32.3756	614480000	543120000	748260000	188390000	275560000	178450000	11	0.602801	-0.28672	P84103;B2R6F3;A0A087X2D0	P84103;B2R6F3;A0A087X2D0	Serine/arginine-rich splicing factor 3	SRSF3;SFRS3
24.0956	24.1999	24.2831	24.2495	25.0843	24.106	723660	575930	637520	330060	156330	197680	1	0.390903	-0.287083	A0A024RCU9;Q96SB4;A8K8B2;H3BLV9;H7C521;Q9UPE1;E7ETV6;Q59GF4;H7C2I2	A0A024RCU9;Q96SB4;A8K8B2;H3BLV9;H7C521;Q9UPE1;E7ETV6;Q59GF4	SRSF protein kinase 1;SRSF protein kinase 3	SRPK1;SRPK2;SRPK3
22.6603	23.5321	23.5566	23.5403	22.7853	24.2888	185100	166540	302970	0	45796	0	3	0.213462	-0.288461	B4DZL4;Q92674;A0A024RCG4;Q5JX02;Q5JX01	B4DZL4;Q92674;A0A024RCG4	Centromere protein I	CENPI
25.8546	26.2383	26.2672	26.3502	26.4956	26.3798	3949300	3291800	4065900	1527000	1169600	1286000	7	0.963742	-0.288497	Q4VXZ8;Q9NUI1;A0A0J9YWI0;A0A0J9YY83;Q9H3W9;G3V0I9;A0A0J9YXZ6;H7C078	Q4VXZ8;Q9NUI1;A0A0J9YWI0	Peroxisomal 2,4-dienoyl-CoA reductase	DECR2
27.6268	27.261	27.4414	27.6802	27.6163	27.8987	3726700	3337200	4114300	1209900	943730	913370	3	0.996314	-0.288678	Q9NVH2;A0A087WXK3;D3DT96	Q9NVH2	Integrator complex subunit 7	INTS7
24.0075	23.9139	23.9097	24.4143	24.1674	24.1188	929220	526230	452560	249430	171400	219590	3	1.3948	-0.289807	O75616;J3QT61;J3QSB2;J3QRV9;K7EQJ8	O75616;J3QT61;J3QSB2;J3QRV9	GTPase Era, mitochondrial	ERAL1
26.8779	27.1786	27.041	27.0842	27.3876	27.501	6344500	5311300	6085800	2300000	1614000	2741700	10	0.896496	-0.291745	A0A087WUK2;O14979;A0A024RDF6;B4DTA2;B4DGN3	A0A087WUK2;O14979;A0A024RDF6;B4DTA2	Heterogeneous nuclear ribonucleoprotein D-like	HNRPDL
30.0448	30.3255	30.3147	30.5935	30.5222	30.4453	31470000	25826000	29543000	16076000	11217000	11545000	0	1.34756	-0.291986	Q12906;A0A024R7C7;F4ZW64;A8K590;B4DFG4;Q59GP7;B4DDF3;K7EKJ9;K7ERM6;K7ENK6;K7EM82;K7EJ09;K7ER69;K7EQR9;K7EQ75;K7ELV3	Q12906;A0A024R7C7;F4ZW64;A8K590;B4DFG4	Interleukin enhancer-binding factor 3	ILF3
27.8421	27.6858	27.6574	28.1055	27.9958	27.9621	24177000	15350000	20776000	4749900	3568000	4202500	9	1.818	-0.292684	P52907;A8K0T9;A0A024R0E5	P52907;A8K0T9;A0A024R0E5	F-actin-capping protein subunit alpha-1	CAPZA1
26.4838	26.6191	26.8357	26.8973	27.3796	26.5415	4511600	3512400	5226800	2267900	1671100	1189700	9	0.48388	-0.293322	B3KM81;Q59E88;Q96EY1;Q53G26;I3L1T6	B3KM81;Q59E88;Q96EY1;Q53G26	DnaJ homolog subfamily A member 3, mitochondrial	DNAJA3
24.0685	23.988	24.2081	24.2677	24.446	24.4359	1258400	566810	1295400	630300	261010	274980	4	1.56898	-0.295015	Q92879;G5EA30;E9PKA1;F5H4Y5;E9PQK4;E9PSH0;F5H0D8;E9PKU1;B4DSZ2;B4DIB6;V9GYD9;B4DT00;B4DDE7;Q5VZZ6;O95319;B2RA86;B4DS31;A0A0J9YX66;A0A1B0GU44;E9PC62;A0A1B0GUN8;A0A0J9YXJ0	Q92879;G5EA30	CUGBP Elav-like family member 1	CELF1
30.1364	28.1695	28.2118	28.6796	28.6725	30.0608	41087000	6101600	7331900	4003100	3001500	9806000	27	0.138576	-0.298431	V9HWB8;P14618;A0A024R5Z9;H3BTN5;B4DNK4;B4DRT3;A0A024R609;H3BQ34;Q8WUW7;Q504U3;H3BR70;H3BUW1;H3BTJ2;H3BT25;H3BU13;Q9UKK4;H3BN34;Q9NYI7;Q9UK31;H3BQZ3;Q9UN47;B4DPM0;Q16716;P30613;Q16715	V9HWB8;P14618;A0A024R5Z9;H3BTN5;B4DNK4;B4DRT3;A0A024R609;H3BQ34;Q8WUW7	Pyruvate kinase PKM;Pyruvate kinase	PKM;PKM2
27.3187	27.1333	26.5597	27.2743	27.1222	27.5166	12387000	4025500	3390700	2126300	1458200	2731500	9	0.515505	-0.300488	P04844;B2RE46;B4DJL0;Q5JYR7;Q5JYR4;F2Z3K5	P04844;B2RE46;B4DJL0	Dolichyl-diphosphooligosaccharide--protein glycosyltransferase subunit 2	RPN2
24.4091	24.1896	24.6098	24.6717	24.7738	24.6666	237620	408690	554710	188650	155470	147570	5	1.12179	-0.301174	A0A087WX60;Q86TC9;A5PKT7	A0A087WX60;Q86TC9	Myopalladin	MYPN
26.4618	26.7757	26.8546	26.8733	27.1493	26.9802	11476000	9870400	12566000	5517700	4951800	4431100	4	0.985623	-0.303559	Q7RTV0;A0A024R1U2	Q7RTV0;A0A024R1U2	PHD finger-like domain-containing protein 5A	PHF5A
29.7294	28.8968	29.49	29.7811	29.5422	29.7153	66330000	32802000	23802000	26950000	15208000	15062000	1	0.525188	-0.307498	B7Z6P1;P68133;P68032;P63267;P62736;D2JYH4;B3KUD3;A8K3K1;Q7Z7J6;A6NL76;B3KW67;B4DUI8;Q13707;F8WB63;B8ZZJ2;C9JFL5;F6UVQ4;F6QUT6;B7Z6I1;B3KPP5;F8WCH0;K4EQ44;K4EP00;K4ENJ5;A0A173GMX0;Q562Y4;Q562X7;Q562X6;Q562X4;Q562X2;Q562X1;Q562X0;Q562W2;Q562U1;Q562U0;Q562T8;Q562T6;Q562T5;Q562T4;Q562T3;Q562T0;Q562R6;Q562R5;Q562R0;Q562Q9;Q562Q8;Q562Q6;Q562Q4;Q562Q2;Q562Q0;Q562P8;Q562L3	B7Z6P1;P68133;P68032;P63267;P62736;D2JYH4;B3KUD3;A8K3K1;Q7Z7J6;A6NL76;B3KW67;B4DUI8;Q13707	Actin, alpha skeletal muscle;Actin, alpha cardiac muscle 1;Actin, gamma-enteric smooth muscle;Actin, aortic smooth muscle	ACTA1;ACTC1;ACTG2;ACTA2
23.1789	23.0319	22.9611	22.7239	23.3958	23.9789	334150	213510	236270	87139	40838	43128	2	0.348092	-0.30896	Q4G0J3;D6R9Z6;A0A024RDH5;D6RFF0;H0YA82	Q4G0J3;D6R9Z6;A0A024RDH5;D6RFF0;H0YA82	La-related protein 7	LARP7
29.7472	26.6378	26.8054	27.5215	27.5728	29.0251	117010000	8443500	8488800	5858100	5799800	15025000	13	0.0988254	-0.309696	V9HWF5;P62937;A8K486;B2RE56;B4DM82;Q71V99;F8WE65;C9J5S7;E5RIZ5;Q9Y536;P0DN26;F5H284;A0A0H2UH34;A0A0B4J2A2;A0A075B767;A0A075B759;P0DN37;B2RXF3	V9HWF5;P62937;A8K486;B2RE56;B4DM82;Q71V99;F8WE65;C9J5S7	Peptidyl-prolyl cis-trans isomerase A;Peptidyl-prolyl cis-trans isomerase A, N-terminally processed;Peptidyl-prolyl cis-trans isomerase	PPIA
22.9439	23.632	23.6714	23.7248	23.102	24.3506	189150	216630	253170	48245	37596	0	2	0.291028	-0.310045	O95625;Q59H97	O95625;Q59H97	Zinc finger and BTB domain-containing protein 11	ZBTB11
23.453	23.792	23.8122	23.8831	24.1594	23.9459	277490	270020	368910	62666	0	0	3	1.0159	-0.310401	Q6P9B9	Q6P9B9	Integrator complex subunit 5	INTS5
26.8589	27.1339	27.4402	27.4233	27.6169	27.3264	1152200	1160900	1828700	694670	462250	397130	18	0.759793	-0.311222	Q15058	Q15058	Kinesin-like protein KIF14	KIF14
26.6242	26.7394	26.6573	27.107	26.9259	26.9321	3238500	2273800	2728900	1718200	617130	520600	15	1.99621	-0.314693	O43290;B4DDH9;E9PQI8;B4DP43;B4DMR4	O43290;B4DDH9	U4/U6.U5 tri-snRNP-associated protein 1	SART1
29.4008	29.5735	29.6283	29.7448	30.0456	29.7573	6324300	5185000	5603100	2929900	2235400	1861300	42	1.23519	-0.315037	Q9UQ35;A0A140VK53;O60382;I3L4D8;A0AUK8;I3L182;Q9UQ39;Q05BI2;Q05CV9;I3L1I8;I3L1C0;I3L0N7;A0A087X1W1;I3L4U6;I3L3Q8;Q5JPB4	Q9UQ35;A0A140VK53;O60382	Serine/arginine repetitive matrix protein 2	SRRM2;KIAA0324
23.3491	23.4714	23.5841	23.4844	23.2484	24.6254	243950	228650	255560	28052	0	0	2	0.299963	-0.317907	Q92830	Q92830	Histone acetyltransferase KAT2A	KAT2A
29.045	28.3525	29.1937	29.0174	29.2967	29.2309	31359000	15792000	27779000	11216000	10556000	10035000	3	0.511119	-0.31794	Q5JP53;Q5SU16;P07437;B7ZAF0;Q6LC01;B4DY90;Q5ST81;B7ZAK1;Q9BUU9;B4E052;B4DQN9;B4DMU8;Q1KSF8;Q96B85;B4DXZ5;B4DMJ5	Q5JP53;Q5SU16;P07437;B7ZAF0;Q6LC01;B4DY90;Q5ST81;B7ZAK1;Q9BUU9;B4E052;B4DQN9;B4DMU8;Q1KSF8;Q96B85;B4DXZ5;B4DMJ5	Tubulin beta chain	TUBB;XTP3TPATP1
26.4351	26.6134	26.8459	27.0673	27.1298	26.6593	7425300	8065400	9316400	4349800	2969100	2823400	6	0.780355	-0.320675	B0QYV1;A0A0G2JRA5;O43251;A0A0G2JRD1;S4R3K7;S4R469;Q8TCM0;F8VR27;F8VZY7;Q59HD3;X5DP44;B7ZLH9;B0QYY4;A0A087X2B1;F8WSN4;X5D7T5;Q9NWB1;J3KNW3;X5DNY3;B7Z1U7;F8VZG9;I3L1D4;F8VRS4;A0A0G2JSB3;B0QYY7;A6NFN3;J3QRF4;B0QYY6;J3QQZ2	B0QYV1;A0A0G2JRA5;O43251;A0A0G2JRD1;S4R3K7;S4R469;Q8TCM0;F8VR27;F8VZY7;Q59HD3;X5DP44;B7ZLH9;B0QYY4;A0A087X2B1;F8WSN4;X5D7T5;Q9NWB1;J3KNW3;X5DNY3;B7Z1U7;F8VZG9;I3L1D4;F8VRS4	RNA binding protein fox-1 homolog;RNA binding protein fox-1 homolog 2;RNA binding protein fox-1 homolog 1	RBM9;RBFOX2;DKFZp547L059;RBFOX1;A2BP1
25.6257	25.4667	25.8693	25.7182	26.2075	26.0037	6645700	4708300	6773000	2994600	2740100	2546900	4	0.811397	-0.322604	Q9Y3C6;A0A024RCX8	Q9Y3C6;A0A024RCX8	Peptidyl-prolyl cis-trans isomerase-like 1	PPIL1
36.6279	36.7969	36.5108	37.0763	37.1555	36.6719	2921800000	2451700000	2534700000	1463100000	1268500000	1067500000	8	0.877471	-0.322698	V9HWE1;P08670;B0YJC4;Q53HU8;B0YJC5;A0A1B0GUA0;A0A1B0GTT5;Q5JVS8;A0A1B0GVG8;Q53SB5;Q45VM8;Q45VM7;Q45VM6;P17661;L7RDA5;A5Z217;Q9H319;A0A0S2Z4T0;H7C5W5;P41219;B3KWQ6;Q5RLN2;B4DE66;B4DUI0;Q59EM6;Q16352;E7EMV2;B4DJT7;E7ESP9;A5YM63;P07197;L7R9R4;K7EKH6;F8W835	V9HWE1;P08670;B0YJC4;Q53HU8	Vimentin	VIM
28.8716	28.7936	29.3041	29.1584	29.473	29.3065	47810000	44735000	50920000	20981000	24874000	20617000	6	0.817201	-0.322867	P56537;B7ZBH1;A0A0U1RQV5;F8WD20;B4DJH0;A0A0B4J1Y7;F8WDS6	P56537;B7ZBH1	Eukaryotic translation initiation factor 6	EIF6
30.7958	26.5494	26.2106	27.1827	27.3786	29.9738	265290000	9341300	6973600	5751300	3915300	35541000	17	0.0658276	-0.326412	Q01469;E7DVW5;I6L8B7;A8MUU1	Q01469;E7DVW5;I6L8B7	Fatty acid-binding protein, epidermal	FABP5
27.2412	27.4425	27.668	27.5893	27.7069	28.0364	5637100	3766200	5462700	2092800	1528400	2661200	10	0.833322	-0.326948	B1ANR0;Q13310;Q6IQ30;H0Y5F5;Q15164;H0YEU6;Q147Y3;Q3B867;Q53GL4;H0YCC8;H0YEQ8;B1ANR1;Q59GZ7;P0CB38	B1ANR0;Q13310;Q6IQ30;H0Y5F5;Q15164	Polyadenylate-binding protein 4	PABPC4
23.9517	23.9761	24.0127	24.0528	24.1664	24.7025	201280	190120	117210	0	0	0	4	0.746563	-0.327076	Q7Z2Z1	Q7Z2Z1	Treslin	TICRR
24.8929	25.0398	24.9032	24.0864	25.8412	25.8897	3895100	2788600	4207500	324830	1095300	2835400	3	0.213464	-0.327179	Q567R6;Q04837;A4D1U3;C9K0U8;A0A0G2JLD8;E7EUY5;B7Z268	Q567R6;Q04837;A4D1U3;C9K0U8;A0A0G2JLD8;E7EUY5;B7Z268	Single-stranded DNA-binding protein;Single-stranded DNA-binding protein, mitochondrial	SSBP1
25.9158	26.6938	26.8819	26.8067	26.6831	27.0031	10091000	18931000	14703000	6453700	5756900	5411400	4	0.465694	-0.333836	Q53GB9;O14880;A0A024R8Z1;Q5VV89;Q5VV87	Q53GB9;O14880;A0A024R8Z1;Q5VV89;Q5VV87	Microsomal glutathione S-transferase 3	MGST3
25.6919	25.5405	25.5359	26.0066	25.9179	25.8555	726400	401920	478580	389290	276320	239000	9	2.12557	-0.337265	A4QN19;A4QN18;O15027;F1T0I1;J3KNL6;X6RGP5;A0A0C4DH09;Q9BV84	A4QN19;A4QN18;O15027;F1T0I1;J3KNL6;X6RGP5	Protein transport protein Sec16A	SEC16A
25.2985	25.3059	25.1793	25.6878	24.9585	26.151	1761200	1546300	2530400	1586200	664850	1682600	3	0.410699	-0.337867	I3L2Z5;A0A087WWR2;Q8WZ46;Q8IUI2;P56270;H3BQI4;H3BQS2;Q9UJ31;Q59GP8	I3L2Z5;A0A087WWR2;Q8WZ46;Q8IUI2;P56270;H3BQI4;H3BQS2	Myc-associated zinc finger protein	MAZ
26.7676	26.6996	27.7717	27.1617	27.4474	27.6587	8177100	4235400	12603000	3793400	3217800	3753200	7	0.384574	-0.342953	B5BU25;P26368;K7ENG2	B5BU25;P26368;K7ENG2	Splicing factor U2AF 65 kDa subunit	U2AF2
26.2439	26.4744	26.696	26.9764	26.6995	26.7713	2183000	1507500	2142900	961010	490010	713450	8	1.04565	-0.344266	B4E0Q4;B4DZJ7;O00267;B4DJK4	B4E0Q4;B4DZJ7;O00267;B4DJK4	Transcription elongation factor SPT5	SUPT5H
28.5234	27.4119	29.4273	28.7143	28.7246	28.9589	45291000	21396000	77120000	17126000	16050000	15270000	4	0.229888	-0.345062	O75607	O75607	Nucleoplasmin-3	NPM3
30.1132	27.8544	27.6716	28.4914	29.1021	29.0921	85075000	15309000	15082000	14421000	17474000	19271000	9	0.161633	-0.348749	Q5T750	Q5T750	Skin-specific protein 32	XP32
27.1736	27.3758	27.5071	27.6607	27.6899	27.7537	12416000	9839700	15335000	4793200	4796300	3120400	7	1.5899	-0.349272	Q15428;Q05DF2;K7EMT0	Q15428;Q05DF2;K7EMT0	Splicing factor 3A subunit 2	SF3A2
25.8943	25.9341	26.3187	26.4801	26.7806	25.9453	2008800	1361100	1785800	833580	614100	611950	7	0.560886	-0.35294	A8K2R3;O60341;R4GMP9;R4GMQ1	A8K2R3;O60341;R4GMP9;R4GMQ1	Lysine-specific histone demethylase 1A	KDM1A
24.5176	25.04	25.1721	25.1528	25.7454	24.8927	4551700	4089400	7940100	3901300	2016500	1423500	4	0.476977	-0.353739	C9JCD9;P41223;C9JNV2;F8WCN7	C9JCD9;P41223;C9JNV2	Protein BUD31 homolog	BUD31
32.7083	33.0682	32.9034	33.3544	33.3407	33.0471	206180000	174870000	183200000	106510000	83015000	68261000	8	1.1528	-0.354113	Q00839;B3KX72;B4DLR3;Q96BA7;A0A1W2PPS1;A0A1W2PP35;A0A1W2PPL4;A0A1W2PPH7;Q7Z4Q5;A0A1W2PQL0;A0A1W2PP34;A0A1W2PQ74;A0A1W2PRZ7;A0A1W2PQD4;A0A1W2PRI6;A0A1W2PPE9;Q9UEL2;A0A1W2PNG3;A0A1W2PP22	Q00839;B3KX72;B4DLR3;Q96BA7;A0A1W2PPS1;A0A1W2PP35;A0A1W2PPL4;A0A1W2PPH7;Q7Z4Q5;A0A1W2PQL0;A0A1W2PP34;A0A1W2PQ74;A0A1W2PRZ7;A0A1W2PQD4	Heterogeneous nuclear ribonucleoprotein U	HNRNPU;HNRPU
28.5192	28.8555	28.9018	29.1019	29.044	29.1971	15584000	15252000	15961000	8019100	5678200	5787900	22	1.29586	-0.355505	Q9NVH1;B4DPK2;B4DGD5;B3KTC6;Q9UMU8;B1AK20;Q5TH61	Q9NVH1;B4DPK2;B4DGD5	DnaJ homolog subfamily C member 11	DNAJC11
27.3797	27.7977	28.8727	28.2	28.1925	28.7299	9062400	7917300	22974000	6294400	3717200	6580500	13	0.303676	-0.357429	O96019;Q53FS0;Q6FI97;H7C5S0;D3DNS0;C9JQT2;O94805	O96019;Q53FS0;Q6FI97	Actin-like protein 6A	ACTL6A;BAF53A
25.6453	25.1424	25.4304	25.7869	25.8681	25.6368	20339000	10619000	10443000	4955500	5799800	5568600	4	1.04663	-0.357913	P62857;B2R4R9	P62857;B2R4R9	40S ribosomal protein S28	RPS28
25.3843	25.0519	25.4267	25.3365	25.4624	26.1438	2306400	1100900	2178600	664830	299180	789350	7	0.578213	-0.359975	H0Y4R1;P12268;B7Z1G4;Q6QE17;E7ETK5;Q6RUP8	H0Y4R1;P12268	Inosine-5-monophosphate dehydrogenase 2	IMPDH2
25.1126	25.0144	25.0437	25.4587	25.4193	25.3758	1304700	1831200	2791700	844880	846400	1136900	4	3.17791	-0.361016	Q9H0U3;B4DH58;A0A087WU53;A8MUP5;Q96SP2	Q9H0U3;B4DH58;A0A087WU53;A8MUP5;Q96SP2	Magnesium transporter protein 1	MAGT1
23.1059	24.32	23.8833	24.4395	24.1213	23.8424	5320800	6740700	6881200	3945000	2410300	1914700	2	0.389497	-0.364672	F8WFB5;E9PD99;B4DU23;Q96II8;B4DEQ7	F8WFB5;E9PD99;B4DU23;Q96II8;B4DEQ7	Leucine-rich repeat and calponin homology domain-containing protein 3	LRCH3
28.4701	28.7799	28.7799	28.9777	29.1696	28.9832	24051000	23556000	40834000	17980000	14032000	13978000	8	1.41221	-0.366854	X6RAL5;O00422;H7BZW6;U3KQ12	X6RAL5;O00422;H7BZW6	Histone deacetylase complex subunit SAP18	SAP18
23.0943	23.3431	23.455	23.3387	23.5362	24.1218	128530	221890	246780	0	29203	32548	3	0.643796	-0.368071	F5H0F9;Q9UJX4;Q49A41;B4DFK4;F5H0N1;B7Z6Z3;F5GY68	F5H0F9;Q9UJX4;Q49A41;B4DFK4;F5H0N1;B7Z6Z3	Anaphase-promoting complex subunit 5	ANAPC5
27.9805	28.2523	28.5894	28.588	28.7176	28.627	17761000	19757000	28327000	9431100	8690200	9422400	16	0.961588	-0.37015	P78406;Q5J8M4;E9PQ57;E9PPG9;B0QZ36;B0QZ37	P78406;Q5J8M4;E9PQ57;E9PPG9	mRNA export factor	RAE1
25.8609	25.78	26.271	26.063	26.4319	26.5343	2019200	1393000	2340100	707420	655020	928290	10	0.826833	-0.372433	O95831;A0A140VK04;E9PMA0;Q5RZ99;Q5RZA0	O95831;A0A140VK04;E9PMA0	Apoptosis-inducing factor 1, mitochondrial	AIFM1
24.4065	24.7475	25.4597	25.4281	25.0766	25.2275	270460	849060	1373400	422150	264440	377840	6	0.498559	-0.372815	G5E9W3;Q9UKF6;Q53F02;B4DQR2;Q05BZ5;A4UCU1	G5E9W3;Q9UKF6;Q53F02;B4DQR2;Q05BZ5	Cleavage and polyadenylation specificity factor subunit 3	CPSF3
25.7375	25.8696	25.7394	26.3308	26.1635	25.9796	1188300	1108100	1152900	647700	446970	369780	6	1.56534	-0.375767	B2RA91;F8VXG7;Q99590;Q05BS8;A0A0A0MTP7;B4DZM2;A0A087WTB7	B2RA91;F8VXG7;Q99590;Q05BS8;A0A0A0MTP7;B4DZM2	Protein SCAF11	SCAF11;SFRS2IP
30.9571	31.3772	31.0619	31.628	31.6735	31.2312	98451000	79033000	84058000	59215000	40290000	29897000	28	0.9381	-0.378845	Q9Y2X3;B3KN82;B4DUY3;H7BZ72;F8WED0	Q9Y2X3;B3KN82	Nucleolar protein 58	NOP58
24.5987	24.4686	24.957	25.4464	24.7522	24.9645	431300	455520	726730	338790	153140	205610	3	0.685214	-0.379613	Q9HCG8;B7WP74	Q9HCG8;B7WP74	Pre-mRNA-splicing factor CWC22 homolog	CWC22
29.0956	25.1958	25.0159	26.2439	26.2302	27.9744	36399000	1299100	999360	1491000	1171100	4142000	12	0.093552	-0.380386	B2RDE1;A0A0S2Z4G4;A0A087WWU8;Q5HYB6;A0A0S2Z4I4;Q5VU61;A0A0S2Z4G8;J3KN67;Q8NAG3;B4DWT5;D6R904;M1VPF4;B4DQ80;P06753;K7EP68;Q8NAH0;H0YL80;H0YKX5;H0YKP3;B4DGC2;Q8TCG4;H0YNC7;Q15657;Q1ZYL5;F5H7S3;D9YZV7;H7BYY1;H0YK48;B7Z722;H0YL52;B7Z596;V9HW25;Q5TCU3;P09493;P07951;D9YZV5;D9YZV4;CON__Q3SX28;A7XZE4;A0A0S2Z4G6;A0A0K0K1I0;A0A024R5W6;Q5TCU8;Q6ZN40;D6RFM2;Q8NI98;Q6LDX7;A0A024R4K5;Q5VU62;B4DTK3;Q59GR8;B4E3P…	B2RDE1;A0A0S2Z4G4;A0A087WWU8;Q5HYB6;A0A0S2Z4I4;Q5VU61;A0A0S2Z4G8;J3KN67;Q8NAG3;B4DWT5;D6R904;M1VPF4	Tyrosine-protein kinase receptor	DKFZp686J1372;TPM3;TPM3-ROS1
26.1645	26.0161	26.0151	26.6188	26.1556	26.5719	14924000	9838100	10659000	7216200	4087700	5455700	1	1.16097	-0.383514	C9JA28;Q9UNL2	C9JA28;Q9UNL2	Translocon-associated protein subunit gamma	SSR3
25.819	26.0094	26.0519	26.0305	26.7184	26.2914	1266400	810490	1089800	480170	451380	323550	9	0.843153	-0.386705	Q9NZB2;A0A0C4DG79;A0A0C4DH52	Q9NZB2	Constitutive coactivator of PPAR-gamma-like protein 1	FAM120A
29.4119	29.4771	30.0325	29.475	29.867	30.7473	36175000	15841000	22451000	5865400	6581800	13262000	25	0.386045	-0.38928	P19338;A0A024R4A0;B3KTP9;B3KM80;Q6ZS99;Q9BQ02;H7BY16;C9JYW2;C9JLB1;C9J1H7;C9JWL1	P19338;A0A024R4A0;B3KTP9;B3KM80;Q6ZS99;Q9BQ02;H7BY16	Nucleolin	NCL
25.9726	26.338	26.3414	26.7364	26.5023	26.5842	5739200	5213900	5881200	3380600	1010600	2194600	7	1.30351	-0.390255	Q9NX63;A4D1N4;C9JRZ6;F8WAR4;B7Z1X9;F8WD73	Q9NX63;A4D1N4;C9JRZ6;F8WAR4;B7Z1X9	Coiled-coil-helix-coiled-coil-helix domain-containing protein 3, mitochondrial	CHCHD3
27.0414	27.2867	27.4889	27.535	27.8386	27.623	9195700	7596900	9967200	4610500	3709000	3642400	7	1.17227	-0.393222	Q96J01;D6RGZ2;H7C0C5;D6REC9	Q96J01;D6RGZ2	THO complex subunit 3	THOC3
24.9883	25.496	25.5329	25.6769	25.7539	25.7661	1238300	1931400	1870900	985110	745400	603210	4	1.03825	-0.393258	Q96GM8;B3KSC7;B4DP23	Q96GM8;B3KSC7;B4DP23	Target of EGR1 protein 1	TOE1
27.0878	27.7294	27.8244	28.0009	27.896	27.9273	8328400	14784000	25427000	9257700	6463900	7116700	3	0.778521	-0.394193	Q10589;A0A024R7H5;B4E0Z6	Q10589;A0A024R7H5;B4E0Z6	Bone marrow stromal antigen 2	BST2
27.0692	27.1252	27.6503	27.8232	27.7301	27.476	4085300	4091100	6641500	2975700	2664600	1833200	10	0.865596	-0.394846	Q16643;D6R9W4;D6RFI1;B3KSQ7;D6RCR4;B7Z2Z0;D6R9Q9	Q16643;D6R9W4;D6RFI1;B3KSQ7	Drebrin	DBN1
32.8333	32.6789	32.7487	33.2905	33.0035	33.1591	181230000	129060000	160710000	91717000	56726000	70690000	4	1.86994	-0.397397	P02545;A0A0C4DGC5	P02545	Prelamin-A/C;Lamin-A/C	LMNA
25.9214	26.3252	26.7056	26.8403	26.7322	26.5783	2222700	2224300	2936400	1793500	1023800	833930	9	0.770447	-0.399532	Q8N556;Q6ZRV0;Q15850	Q8N556;Q6ZRV0	Actin filament-associated protein 1	AFAP1
29.166	29.4788	29.7456	29.9121	29.8035	29.8783	9683000	7642700	9894700	4482100	2805100	3086600	36	1.10628	-0.40117	Q8TEM1	Q8TEM1	Nuclear pore membrane glycoprotein 210	NUP210
30.3126	28.3564	28.1783	28.9442	29.1461	29.9776	68250000	10630000	9712800	8365400	5652600	11488000	23	0.209177	-0.406885	V9HW65;P07355;A0A024R5Z7;H0YN42;H0YMD0;H0YMU9;A6NMY6;H0YKS4;H0YM50;H0YNP5;B3KRQ1;B4DNH8;H0YN28;H0YL33;H0YMM1;H0YKZ7;H0YLV6;H0YMT9;H0YKX9;H0YNA0;H0YKV8;H0YKL9;H0YMW4;H0YMD9;H0YN52;H0YNB8;H0YKN4;H0YLE2	V9HW65;P07355;A0A024R5Z7;H0YN42;H0YMD0;H0YMU9;A6NMY6;H0YKS4;H0YM50;H0YNP5;B3KRQ1;B4DNH8;H0YN28;H0YL33	Annexin A2;Annexin;Putative annexin A2-like protein	ANXA2;ANXA2P2
32.1987	32.5382	32.235	32.8595	32.9149	32.4361	159180000	159910000	136300000	99375000	70011000	57068000	35	1.04494	-0.412877	O00567;A8K9K6;A0PJ92;H0YDU4;Q5JXT2;H0Y653;Q9BSN3	O00567;A8K9K6;A0PJ92	Nucleolar protein 56	NOP56
24.0956	23.8663	24.6646	25.2535	24.1199	24.5196	1169500	814290	1409100	1085400	349530	683340	3	0.444561	-0.422192	H0Y7N6;F6XFR5;B4DQA3;J3QSX6;B3KSG3;B7Z4H1;F8W8M4;A0A0A0MRL6;O14639	H0Y7N6;F6XFR5;B4DQA3;J3QSX6;B3KSG3;B7Z4H1;F8W8M4;A0A0A0MRL6;O14639	Actin-binding LIM protein 1	ABLIM1
25.1728	23.2904	23.4059	24.2123	22.7309	26.1964	4421000	484540	323550	641110	0	1005400	7	0.132769	-0.423508	E9PK01;P29692;E9PMW7;E9PPR1;E9PL12;E9PQ49;E9PI39;A0A087X1X7;Q71RH4;Q9H7G6;D3DWK1;B2RAR6;E9PRY8;E9PIZ1;H0YCK7;E9PN91;E9PL71;Q9BW34;E9PK72;E9PK06;E9PQZ1;E9PKK3;E9PNW6;E9PQC9;E9PJD0;H0YE58;H0YE72	E9PK01;P29692;E9PMW7;E9PPR1;E9PL12;E9PQ49;E9PI39;A0A087X1X7;Q71RH4;Q9H7G6;D3DWK1;B2RAR6;E9PRY8;E9PIZ1;H0YCK7;E9PN91;E9PL71;Q9BW34	Elongation factor 1-delta	EEF1D
30.0168	29.5406	29.5819	30.1484	30.1194	30.1497	51069000	16660000	24235000	16412000	14306000	21574000	0	1.30771	-0.426098	B3KT06;B3KPS3;P68363;A8JZY9;B4DDU2	B3KT06;B3KPS3;P68363;A8JZY9;B4DDU2	Tubulin alpha-1B chain	TUBA1B
25.4208	25.5412	25.6245	26.1417	25.8579	25.8791	1819100	2106100	1938000	1356000	846980	1038700	5	1.77822	-0.430703	B5BU99;Q9Y5A9;Q658Z6;B4DT65;Q8NA80;Q8N3V9;A0A024R7W5;Q9BYJ9;B3KTL8;A0A087X0Q1;Q7Z739;B4DPX9;A0A087WY31;S4R3J8;S4R3V3;Q96MZ5	B5BU99;Q9Y5A9	YTH domain family protein 2	YTHDF2
24.1716	24.2241	24.4009	24.2212	24.9304	24.9403	586260	375710	512130	147700	0	240070	3	0.805133	-0.431738	Q14694;H3BNS8;H3BQP1;H3BNA1;Q6P2I0;J3KT19;B4DDR4	Q14694	Ubiquitin carboxyl-terminal hydrolase 10	USP10
24.5165	24.046	24.1714	24.3396	24.4933	25.2197	998380	346860	578910	171770	142360	353210	5	0.650089	-0.439577	Q7Z759;Q53HU0;P50990;H7C4C8	Q7Z759;Q53HU0;P50990;H7C4C8	T-complex protein 1 subunit theta	CCT8
24.0034	24.2704	24.2294	24.4188	24.4966	24.9081	2578300	1747400	2248600	748590	738290	0	4	1.19565	-0.440124	B4DH46;P61962;A0A087WWI6	B4DH46;P61962	DDB1- and CUL4-associated factor 7	DCAF7
25.5933	25.9093	25.6744	26.2	26.2863	26.025	468340	720070	430080	288120	182060	135680	7	1.66014	-0.444744	Q92576;D6R9X2;E9PE34;A0A1B0GX99;B3KP41;A8K376;E7EVH3;B0AZS7	Q92576	PHD finger protein 3	PHF3
23.518	23.4486	23.4736	24.1922	23.7449	23.8384	329080	205700	168390	0	0	0	4	1.49598	-0.445104	A8K321;B4DZ55;Q6ZXV5	A8K321;B4DZ55;Q6ZXV5	Transmembrane and TPR repeat-containing protein 3	TMTC3
23.9505	23.9934	24.4032	25.2277	24.902	23.5615	184340	125810	200840	149340	35364	18528	6	0.351188	-0.447992	Q9Y2F5	Q9Y2F5	Uncharacterized protein KIAA0947	KIAA0947
24.8884	24.4769	24.5508	24.6632	25.1812	25.4168	2466500	1422900	1737300	1043500	1052700	1466800	3	0.810082	-0.448388	P39019;B0ZBD0;Q8WVX7;A0A075B6E2;M0R2L9;M0QXK4;M0QYF7;M0R140	P39019;B0ZBD0;Q8WVX7;A0A075B6E2	40S ribosomal protein S19	RPS19
25.685	25.2139	25.7803	25.764	26.5003	25.7705	1651000	444630	943330	259470	267750	213950	4	0.683555	-0.451878	B4DQZ7;S4R3H4;E7EQT4;Q9UKV3;G3V3B0;Q69YJ6	B4DQZ7;S4R3H4;E7EQT4;Q9UKV3;G3V3B0;Q69YJ6	Apoptotic chromatin condensation inducer in the nucleus	ACIN1;DKFZp667N107
26.6721	25.0116	24.8575	25.5994	25.6996	26.5985	6547900	1315500	2042900	605360	606130	1527100	7	0.273927	-0.452089	E9PBS1;P22234;A0A024RD93;D6RF62;B4DGX3	E9PBS1;P22234;A0A024RD93;D6RF62	Multifunctional protein ADE2;Phosphoribosylaminoimidazole-succinocarboxamide synthase;Phosphoribosylaminoimidazole carboxylase	PAICS
28.4711	28.5624	28.5219	28.7433	29.1801	28.9956	9886700	7929500	8061900	4063400	4422600	3655700	11	1.60951	-0.454513	Q8IYB3;A0A0S2Z4W1;A9Z1X7;A0A0S2Z4Z6;E9PCT1;B7Z7U0;M0R088;M0R1E7;M0QXG5	Q8IYB3;A0A0S2Z4W1;A9Z1X7;A0A0S2Z4Z6;E9PCT1;B7Z7U0;M0R088	Serine/arginine repetitive matrix protein 1	SRRM1
25.8963	26.2645	26.0609	26.0984	26.9814	26.5078	1317700	1262500	1654400	657980	663190	657490	9	0.757132	-0.455304	Q86VM9;E7ERS3;B4DTK7;Q86YU5;B4DZ24;H3BRN6;H3BRH3;B3KRL4;H3BP01;REV__Q86VM9;REV__E7ERS3;REV__B4DTK7	Q86VM9;E7ERS3;B4DTK7	Zinc finger CCCH domain-containing protein 18	ZC3H18
35.8296	35.7073	35.8358	36.3333	36.2689	36.1447	3214900000	2287200000	2914200000	1866800000	1283300000	1264000000	2	2.56456	-0.458055	P63261;B4E3A4;B4DVQ0;I3L3I0;I3L1U9;I3L4N8;K7EM38;I3L3R2;J3KT65	P63261;B4E3A4;B4DVQ0;I3L3I0;I3L1U9	Actin, cytoplasmic 2;Actin, cytoplasmic 2, N-terminally processed	ACTG1
29.0692	29.6166	29.8166	29.6927	29.9879	30.198	41255000	44182000	66125000	23296000	23251000	25025000	12	0.792827	-0.458745	D6R9P3;D6RD18;B4DMY3;D6RBZ0;Q53F64;Q99729	D6R9P3;D6RD18;B4DMY3;D6RBZ0;Q53F64;Q99729	Heterogeneous nuclear ribonucleoprotein A/B	HNRNPAB
27.6897	27.7186	28.1556	27.9371	28.0147	28.9891	73920000	54706000	79132000	30545000	24322000	47547000	6	0.548035	-0.459028	P42766;F2Z388;A4D2M5;A0A024R866	P42766;F2Z388;A4D2M5;A0A024R866	60S ribosomal protein L35	RPL35;LOC154880
25.598	25.7532	25.6543	26.2334	26.2222	25.9364	241400	203960	337960	143610	76155	79084	11	1.90131	-0.462213	P49454	P49454	Centromere protein F	CENPF
33.6246	34.0242	34.3262	34.2324	34.215	34.9171	2773100000	2601800000	3399400000	918130000	665980000	1314900000	2	0.684324	-0.46314	Q99879;Q99877;Q93079;Q5QNW6;Q0D2M2;P62807;P58876;O60814;B2R4S9;A8K9J7;A0A024RCL8;A0A024RCJ9;A0A024QZZ7;I6L9F7;U3KQK0;B4DR52;P57053;Q99880	Q99879;Q99877;Q93079;Q5QNW6;Q0D2M2;P62807;P58876;O60814;B2R4S9;A8K9J7;A0A024RCL8;A0A024RCJ9;A0A024QZZ7;I6L9F7;U3KQK0;B4DR52;P57053;Q99880	Histone H2B type 1-M;Histone H2B type 1-N;Histone H2B type 1-H;Histone H2B type 2-F;Histone H2B type 1-C/E/F/G/I;Histone H2B type 1-D;Histone H2B type 1-K;Histone H2B;Histone H2B type F-S;Histone H2B type 1-L	HIST1H2BM;HIST1H2BN;HIST1H2BH;HIST2H2BF;HIST1H2BC;HIST1H2BD;HIST1H2BK;HIST1H2BI;H2BFS;HIST1H2BL
26.2542	26.3574	26.3218	25.9671	26.8388	27.5397	4978400	3307300	3611700	1308300	1922800	2756100	6	0.443534	-0.470741	Q9H6F5;H0YG79;Q6ZW18	Q9H6F5	Coiled-coil domain-containing protein 86	CCDC86
27.452	27.6636	27.9353	28.0738	28.3657	28.0377	25648000	22555000	28682000	13936000	14171000	9085100	7	1.2799	-0.475434	H3BV80;H3BMM9;H3BTC0;Q15287;D3DU92;H3BPG5;H3BMS0;A0A024R9P1;H3BRK4;H3BTV0;H3BNI3;H3BP82;H3BTR6;H3BUG0;H3BTY0;H3BNU7;H3BUL0	H3BV80;H3BMM9;H3BTC0;Q15287;D3DU92;H3BPG5;H3BMS0;A0A024R9P1	RNA-binding protein with serine-rich domain 1	RNPS1
25.3035	25.6081	25.6578	25.7111	26.0713	26.2154	2470400	2443300	2860700	1071800	1040600	722740	7	1.20038	-0.476152	B2R8G6;Q14318;A0A024R7P2;B7Z6M0;U3KQ64;A0A0A0MTJ1;M0R2K9;U3KQI1;M0R1Q0;M0R1S6;M0R2Q6	B2R8G6;Q14318;A0A024R7P2;B7Z6M0;U3KQ64;A0A0A0MTJ1	Peptidyl-prolyl cis-trans isomerase FKBP8	FKBP8
23.8663	24.237	24.5873	25.0157	24.5111	24.5947	167430	290320	432780	242460	97093	119580	4	0.851506	-0.476963	E7ESW5;F8W9U9;J3JSM9;A0A087WW76;Q5T5U3;B4DM37;B7Z3A3;A0A1B0GV73;A0A1B0GW11;H0Y5T2	E7ESW5;F8W9U9;J3JSM9;A0A087WW76;Q5T5U3;B4DM37;B7Z3A3;A0A1B0GV73	Rho GTPase-activating protein 21	ARHGAP21
23.7832	23.9694	23.7872	24.8075	24.6598	23.5068	637040	357220	336450	377080	256600	54597	3	0.50278	-0.478118	Q9Y305;Q9H2R8;H7C5Q2	Q9Y305;Q9H2R8;H7C5Q2	Acyl-coenzyme A thioesterase 9, mitochondrial	ACOT9
25.5587	25.7854	25.3271	26.0773	26.2696	25.7691	1710000	3473700	899920	1013400	557000	286230	7	1.15051	-0.481635	Q7L0Y3;C9JVB6	Q7L0Y3;C9JVB6	Mitochondrial ribonuclease P protein 1	TRMT10C
27.286	27.9251	27.7674	28.205	28.1192	28.0995	16529000	23054000	18787000	10885000	8210200	7551900	9	1.16206	-0.4817	O96008;K7EJ57;K7EKG4	O96008;K7EJ57	Mitochondrial import receptor subunit TOM40 homolog	TOMM40
24.9654	25.2464	24.9204	25.4033	25.6439	25.5322	3182300	1939000	3137600	1212300	1017900	1009700	6	1.75887	-0.482376	Q9NQT4;M0R050;B2RC50;M0R102	Q9NQT4;M0R050;B2RC50	Exosome complex component RRP46	EXOSC5
27.2397	27.1876	27.2849	27.7953	27.6544	27.7236	19639000	12490000	14161000	10661000	5015700	8872900	6	3.22473	-0.487029	Q5U0N1;Q15773;A8K1F4;F5H0Y3;F5H7L5;F5H800	Q5U0N1;Q15773;A8K1F4	Myeloid leukemia factor 2	MLF2
25.2036	24.5897	24.9202	25.0699	25.6941	25.416	3375200	1494100	2004300	854900	961640	1006700	4	0.900915	-0.48882	Q53GE2;Q53GC7;P47755;A4D0V4;C9JUG7;F8W9N7;B4DE01;A0A0D9SET8	Q53GE2;Q53GC7;P47755;A4D0V4;C9JUG7;F8W9N7;B4DE01	F-actin-capping protein subunit alpha-2	CAPZA2
28.9394	29.1372	29.128	29.4411	29.9825	29.2505	102530000	105540000	126370000	67380000	70355000	47335000	4	1.00555	-0.489805	G3V279;P84090;A0A024R6D4	G3V279;P84090;A0A024R6D4	Enhancer of rudimentary homolog	ERH
27.2098	27.4099	27.8065	27.9142	28.0408	27.9631	6385200	4500400	10946000	2790600	1769200	1116300	14	1.30067	-0.49728	P27694;I3L4R8;I3L524;I3L2M5	P27694;I3L4R8	Replication protein A 70 kDa DNA-binding subunit;Replication protein A 70 kDa DNA-binding subunit, N-terminally processed	RPA1
26.7292	26.3333	25.8518	26.7783	26.4453	27.1831	16318000	8370300	7222800	4594100	2678700	4621200	3	0.682321	-0.497452	P46783;Q59GE4;F6U211;A0A1W2PQS6;Q14489;Q9NQ39;S4R435	P46783;Q59GE4;F6U211;A0A1W2PQS6	40S ribosomal protein S10	RPS10
29.5675	27.0599	27.2773	28.1043	27.2871	30.0104	22703000	6269700	4395100	5878600	3821800	5533200	15	0.165214	-0.499024	V9HWB4;P11021;B4DEF7	V9HWB4;P11021	78 kDa glucose-regulated protein	HSPA5
26.0514	26.4169	26.1737	26.8768	26.8922	26.3754	2479000	3228700	3578800	1980500	776840	1300600	10	1.17218	-0.500767	Q6FG43;Q9BTI6;Q14254;J3QLD9;A0A024QZ62;E7EMK3;K7EKW9	Q6FG43;Q9BTI6;Q14254;J3QLD9;A0A024QZ62;E7EMK3;K7EKW9	Flotillin-2	FLOT2
26.1321	26.5577	26.3941	27.0473	26.8676	26.6849	2628000	2066800	2416300	1230700	713060	892770	14	1.44744	-0.505285	B4DSH1;Q99459;B3KY60	B4DSH1;Q99459;B3KY60	Cell division cycle 5-like protein	CDC5L
26.7613	26.6781	26.5507	27.0746	27.0953	27.3454	25583000	15311000	15601000	8048100	8382700	7501800	3	2.05568	-0.508399	Q9NS69;Q549C5;Q53GB0	Q9NS69;Q549C5;Q53GB0	Mitochondrial import receptor subunit TOM22 homolog	TOMM22;MST065
26.412	27.0114	27.0593	27.5598	27.2372	27.2236	2784800	3132900	3308900	2120400	1112600	1389500	13	1.02209	-0.512665	Q8IWX8;J3QK89;Q59ET1;B4DL82;B4DPM4	Q8IWX8;J3QK89;Q59ET1;B4DL82;B4DPM4	Calcium homeostasis endoplasmic reticulum protein	CHERP
22.862	22.7185	22.8777	22.931	23.7725	23.3048	354610	227930	295280	161870	45205	55583	2	0.973767	-0.516731	D6R9D6;A0A024R9W3;B7Z8Z7;B7ZLP7;A0AV96;D6R9M7;D6REZ6;D6RBS9	D6R9D6;A0A024R9W3;B7Z8Z7;B7ZLP7;A0AV96;D6R9M7;D6REZ6;D6RBS9	RNA-binding protein 47	RBM47
26.3206	23.3274	23.4736	22.499	24.2978	27.8856	3402100	314620	672100	168440	207900	4680800	6	0.100463	-0.520229	Q5U077;P07195;A8MW50;F5H793;C9J7H8	Q5U077;P07195;A8MW50	L-lactate dehydrogenase;L-lactate dehydrogenase B chain	LDHB
24.4237	24.9563	24.7503	25.2586	25.1655	25.2698	2966900	1597800	3302100	1605200	1327300	1742300	2	1.51869	-0.521212	H7C561;H7C0N4;L0R8E5	H7C561;H7C0N4;L0R8E5		SF1
24.0724	24.0826	24.2127	24.9296	24.7868	24.2189	347270	362170	279910	283730	176690	115300	4	1.10842	-0.522519	Q8IX26;F5GZI3;Q8IX28;Q8IX27;Q5VWU8;Q5VWV2;Q8TEW0;B1AP52	Q8IX26;F5GZI3;Q8IX28;Q8IX27;Q5VWU8;Q5VWV2;Q8TEW0	Partitioning defective 3 homolog	PARD3
29.2317	29.5923	29.6228	30.1182	29.9974	29.908	19446000	16713000	20874000	14004000	7794700	6645300	26	1.70598	-0.525579	Q8IVT2	Q8IVT2	Mitotic interactor and substrate of PLK1	MISP
27.724	27.9156	28.0993	28.5071	28.4529	28.3704	22016000	6289600	3720200	4218500	3635000	5481600	4	1.99779	-0.530505	Q9BR77;F5H0W5	Q9BR77	Coiled-coil domain-containing protein 77	CCDC77
26.5513	26.4477	26.4543	27.2057	26.8427	26.9964	9052400	6432600	6499100	5453000	3015000	4455800	6	2.06449	-0.530514	B4DVN1;O75190;B4DNN5;A0A0J9YX62;E9PH18;B4DMJ9;C9J2C4;A7UJ17;C9JB42;Q75MP3;C9JDR7;C9JDX6;F8WCZ4;C9J2P2;B4DNF1;C9JN01;Q49A72;B4DJY6;Q8WWF6;C9JRD2;Q8NHS0;A0A140VJI2;C9JXB9;P25686;A8K0R1	B4DVN1;O75190;B4DNN5;A0A0J9YX62;E9PH18;B4DMJ9;C9J2C4;A7UJ17	DnaJ homolog subfamily B member 6	DNAJB6
24.1541	24.3331	24.7237	24.9718	24.9939	24.8449	705910	612130	623960	285160	347660	132630	4	1.42266	-0.533245	F8VZN8;A0A024RBF1;O14974;B2RAH5;F8VW28;H0YHL8;H0YIS4;H0YHI8	F8VZN8;A0A024RBF1;O14974;B2RAH5;F8VW28;H0YHL8	Protein phosphatase 1 regulatory subunit 12A	PPP1R12A
26.8214	26.8616	27.1582	27.5683	27.4741	27.4051	1439000	1273500	1412200	1290100	498650	655570	17	2.00061	-0.535419	P35658;A0A024R8B6;Q7Z3C4;A0A0A0MSW3;H0Y837;H0YF36;B7ZAX0;B7ZAV2;B4DYZ6;B4DZN4;E9PKD2	P35658;A0A024R8B6;Q7Z3C4;A0A0A0MSW3	Nuclear pore complex protein Nup214	NUP214;DKFZp686J0330
25.4201	25.8105	26.0519	26.3812	26.2854	26.241	1283400	950360	1462000	952250	337130	547190	6	1.343	-0.541698	Q86WA8;E7EN44;B4DGU5;H3BUW8;B3KNH8;B3KXC7;H3BQ67;Q9BU35;Q6ZMF9	Q86WA8;E7EN44;B4DGU5;H3BUW8;B3KNH8;B3KXC7	Lon protease homolog 2, peroxisomal	LONP2
33.6694	31.5004	30.8079	32.1031	32.4657	33.0591	525820000	85245000	62778000	65106000	60805000	108100000	38	0.239237	-0.550083	Q5T749	Q5T749	Keratinocyte proline-rich protein	KPRP
28.0283	28.8347	28.2681	28.714	29.306	28.7636	36055000	43261000	28454000	17476000	19301000	14924000	3	0.837634	-0.550877	Q4VB24;P10412;B2R984;A3R0T8;A3R0T7	Q4VB24;P10412;B2R984;A3R0T8;A3R0T7	Histone H1.4	HIST1H1E
26.0379	26.5294	26.6898	27.5427	26.8986	26.4777	1126300	1246200	1852300	821690	377020	641660	11	0.687727	-0.553965	B4E2E5;E9PHV5;P28290;E7EUL7;B3KXT1;B4DP45;B4DQT6;H7BZ26	B4E2E5;E9PHV5;P28290;E7EUL7;B3KXT1;B4DP45	Sperm-specific antigen 2	SSFA2
23.3173	23.358	23.4091	23.4383	24.6047	23.7121	251460	190950	224150	37922	0	50194	2	0.721439	-0.556949	Q92667;A0A140VK05;B4DN86;I3L0V5;I3L3V6;I3L2A2;I3L2N7	Q92667;A0A140VK05;B4DN86;I3L0V5;I3L3V6;I3L2A2;I3L2N7	A-kinase anchor protein 1, mitochondrial	AKAP1
33.7223	34.0061	34.6598	34.4744	34.4766	35.1103	2297300000	2178500000	3720100000	1456100000	1091600000	1937700000	13	0.73213	-0.557711	P62805;B2R4R0;Q0VAS5;Q6B823	P62805;B2R4R0;Q0VAS5	Histone H4	HIST1H4A;HIST1H4L;HIST1H4H
27.3433	27.2416	26.9702	27.6735	27.6043	27.9529	15894000	9588200	9670300	6193800	3997600	6264000	7	1.65202	-0.55856	P49755;A0A024R6I3;Q53GF9;B4DZH3;G3V2K7;B4DL12	P49755;A0A024R6I3;Q53GF9;B4DZH3	Transmembrane emp24 domain-containing protein 10	TMED10
24.8579	25.2136	25.4452	25.7514	25.9181	25.5353	983160	754990	813090	426880	321170	549430	6	1.29561	-0.56271	H0YJA2;Q6PJT7;G3V5I6;A0A024R6F2;G3V256;G3V411;H0YJ87;A0A087WTC9;H0YJ51;G3V3Y4	H0YJA2;Q6PJT7;G3V5I6;A0A024R6F2;G3V256;G3V411	Zinc finger CCCH domain-containing protein 14	ZC3H14
27.6536	27.8825	28.003	28.382	28.5989	28.276	2616200	2308900	3084400	1537300	1440900	1263600	18	1.82749	-0.572597	E9PMS6;A0A1P7ZIM8;E9PMT2;F8WD26;F8J2B5;J3KP06;Q8WWI1;B7Z8W3;A0A0A0MTE2;E9PMP7;H0Y424;H0YE95;H0YDQ3;H0YDG6	E9PMS6;A0A1P7ZIM8;E9PMT2;F8WD26;F8J2B5;J3KP06;Q8WWI1;B7Z8W3;A0A0A0MTE2	LIM domain only protein 7	LMO7
28.864	28.9266	28.9017	29.4704	29.1901	29.78	13215000	9540400	12811000	8049100	4612000	9426100	19	1.56456	-0.582737	A0A024R5U7;Q9NWH9;A0A024R5X3;H7C3F4;H0YMM0;H0YKH2;H7BXE3	A0A024R5U7;Q9NWH9;A0A024R5X3;H7C3F4	SAFB-like transcription modulator	SLTM
28.0897	28.0607	27.9607	28.7087	28.3678	28.7846	10170000	4530000	6421300	4665800	2197500	5827800	10	1.91629	-0.583347	B7Z2Z1;B7ZLP5;Q15424;A8K329;B7Z1C7;B7Z2F6;B7Z5X3;B7Z959;K7EII0;K7ES42;B7Z2H3	B7Z2Z1;B7ZLP5;Q15424;A8K329;B7Z1C7;B7Z2F6;B7Z5X3;B7Z959	Scaffold attachment factor B1	SAFB
26.1864	26.489	26.8943	27.1423	26.9729	27.2078	4608700	4179700	5279300	2918100	1597000	1934900	9	1.26549	-0.584406	F5H669;B4DGF8;Q8N684;F5H6M0;F5H047;J3QT54;C9J286;C9J323;C9JM38;F5H5B7;F5H1W4;F5H2K8;F5H6P5;F5H6A8;F5GXA3	F5H669;B4DGF8;Q8N684;F5H6M0;F5H047;J3QT54	Cleavage and polyadenylation specificity factor subunit 7	CPSF7
25.9214	24.7212	24.3052	24.9441	25.4603	26.3026	5014700	1118100	784420	799470	777270	1526100	7	0.396037	-0.586381	G3V295;P60900;A0A140VK44;G3V5Z7;G3V3I1;G3V3U4;Q9BZ93;Q59F72	G3V295;P60900;A0A140VK44;G3V5Z7;G3V3I1;G3V3U4	Proteasome subunit alpha type;Proteasome subunit alpha type-6	PSMA6
24.5369	25.0568	25.6397	25.7772	25.5213	25.6973	903790	732910	1298200	637720	465210	372270	6	0.832135	-0.58746	Q8NBJ5;M0QYH0;B3KQ10;Q8WUI9;Q9H6F1;M0QX72;Q6IPW8	Q8NBJ5	Procollagen galactosyltransferase 1	COLGALT1
28.2899	26.6536	26.5515	27.3626	27.7201	28.1754	19759000	3756800	4137700	2753500	2448100	3957600	14	0.408774	-0.587681	Q96P63;Q3SYB5	Q96P63	Serpin B12	SERPINB12
29.9979	29.7475	30.023	30.4533	29.9222	31.1563	27461000	17882000	27399000	14090000	4900300	21532000	19	0.731665	-0.587802	Q14151;A0PJ47;K7EQU4;K7ERX3;B4DU53	Q14151	Scaffold attachment factor B2	SAFB2
29.009	29.2762	29.484	29.8474	29.8755	29.8116	13804000	11489000	16427000	9332900	6540800	6487500	20	1.8781	-0.588435	F8VQE1;B4DN52;Q9UHB6;Q53GG0;F8VS07;B3KTW2;F8VRN8	F8VQE1;B4DN52;Q9UHB6;Q53GG0;F8VS07;B3KTW2;F8VRN8	LIM domain and actin-binding protein 1	LIMA1
23.8026	22.9828	23.512	23.182	24.9133	23.9861	696590	276960	447690	0	77859	0	2	0.463264	-0.594676	A0A087WXN4;Q96CB8;A0A024RDK4;D6R9Y5;A0A1B0GX90;C9JDP3;C9J0M6;E9PGI3	A0A087WXN4;Q96CB8;A0A024RDK4;D6R9Y5;A0A1B0GX90;C9JDP3;C9J0M6;E9PGI3	Integrator complex subunit 12	INTS12
23.2417	23.3199	23.3268	23.8986	24.0459	23.7443	940620	698840	621220	519090	439240	345570	2	2.5581	-0.600112	E5RHF4;Q9P015;B2R739;E5RIZ4	E5RHF4;Q9P015;B2R739;E5RIZ4	39S ribosomal protein L15, mitochondrial	MRPL15
34.4055	32.8784	32.8074	33.7797	33.7364	34.4112	145880000	38758000	39178000	33409000	22265000	41901000	196	0.468897	-0.611986	P15924;Q4LE79;B4E2A0;B4DKX6;B4DWT7;G1UI31;Q6ZP16	P15924;Q4LE79	Desmoplakin	DSP;DSP variant protein
26.2108	25.3374	25.3117	25.7232	26.1076	26.8703	3329700	1348100	1885700	713160	628550	1447600	8	0.614733	-0.613744	O43175;V9HW79;Q5SZU1;B3KSC3;Q9UMY2;Q8N5M8;Q9UMY3;Q96RV5	O43175;V9HW79;Q5SZU1;B3KSC3;Q9UMY2;Q8N5M8	D-3-phosphoglycerate dehydrogenase	PHGDH;PGDH3
25.9604	25.2629	24.9724	25.8997	26.0302	26.1168	4197900	1327600	746640	1202100	1053900	1296500	6	0.963452	-0.616991	B4DUL5;P31930;B4DZB9	B4DUL5;P31930	Cytochrome b-c1 complex subunit 1, mitochondrial	UQCRC1
31.2275	31.5622	31.7334	32.3539	32.1917	31.8314	15722000	13209000	16471000	10472000	6465900	4942100	85	1.34847	-0.618005	P49792;D3DX73;P0DJD0;P0DJD1;F8VYC4;B4DYH0;A0A1W2PNU4;Q5JC46;Q5JC45;B4DTT2;B4E0M7;Q13073;B4DTM4;F8WBP7	P49792	E3 SUMO-protein ligase RanBP2;Putative peptidyl-prolyl cis-trans isomerase	RANBP2
26.0365	25.9818	26.4129	26.7953	26.6253	26.8697	1067400	845260	1355200	661960	376310	482160	15	1.80485	-0.619696	Q8WX93;B2RTX2;L0R8B3;Q7L8P5;H0YA05;D6R9F5;D6RBB1;F8WA26;H0Y952	Q8WX93;B2RTX2	Palladin	PALLD
26.4451	25.9688	25.643	26.9401	27.1103	25.8682	3295100	4543300	3655400	3896900	3112400	1306300	5	0.614784	-0.620539	Q8TAS0;P36542;B4DL14;B4DFE6	Q8TAS0;P36542;B4DL14	ATP synthase subunit gamma;ATP synthase subunit gamma, mitochondrial	ATP5C1
29.7784	26.8667	26.3786	27.8569	28.0171	29.0171	86900000	5981900	4407400	4784000	2627500	7355300	20	0.215736	-0.622455	P31944;B2CIS9;A9UFC0	P31944;B2CIS9;A9UFC0	Caspase-14;Caspase-14 subunit p19;Caspase-14 subunit p10	CASP14
27.478	27.8775	28.0144	28.1537	28.4005	28.6876	56939000	46141000	53179000	22993000	21593000	31155000	4	1.31116	-0.623985	A0A024R326;P47914;Q6IPI1	A0A024R326;P47914;Q6IPI1	60S ribosomal protein L29	RPL29
28.2074	26.3883	26.068	27.1273	27.4985	27.9134	13925000	1551800	1920500	1665700	1042400	1939900	11	0.37203	-0.625167	Q16610;A0A140VJI7;C8CHS3;B7ZAS5	Q16610;A0A140VJI7	Extracellular matrix protein 1	ECM1
24.0029	24.5194	24.4514	25.2403	24.8739	24.7481	1343000	1457500	1163200	1096400	513970	467350	4	1.34315	-0.629546	Q6UXV4;A0A087WYF7;A0A087WUX8;Q68DW4	Q6UXV4;A0A087WYF7;A0A087WUX8;Q68DW4	Apolipoprotein O-like	APOOL;DKFZp779P1227
24.9624	24.7248	24.7445	25.7865	25.462	25.0808	708050	314810	525130	499230	419760	169470	8	1.35803	-0.632555	Q8TCS8;H7BXF6;F8WBI3;H7C3C5	Q8TCS8	Polyribonucleotide nucleotidyltransferase 1, mitochondrial	PNPT1
26.6743	23.9435	24.1278	25.0085	25.0292	26.6057	7903600	708550	238350	746400	628800	1019300	11	0.242982	-0.632599	Q0QF37;Q75MT9;Q6FHZ0;P40926;A0A024R4K3;G3XAL0;B3KTM1	Q0QF37;Q75MT9;Q6FHZ0;P40926;A0A024R4K3;G3XAL0;B3KTM1	Malate dehydrogenase;Malate dehydrogenase, mitochondrial	MDH2
30.1666	30.2527	30.4899	31.0291	30.8664	30.9136	68073000	43423000	65475000	40486000	25167000	28254000	24	2.37353	-0.633329	Q15233;A8K525;A0A0S2Z4Z9;H7C367;C9JYS8;C9IZL7;C9J4X2;A0A0S2Z4E7	Q15233;A8K525;A0A0S2Z4Z9;H7C367;C9JYS8	Non-POU domain-containing octamer-binding protein	NONO
27.4458	25.1938	25.6308	26.2992	26.0657	27.8054	6050300	1629400	1302900	1768500	1949100	4035500	9	0.291538	-0.633333	A0A0K0K1H9;A0A0B4J1R6;B3KSI4;B4E022;V9HWD9;Q53EM5;P29401;B3KPZ8;B4DVU1;E9PFF2;A0A0S2Z5C0	A0A0K0K1H9;A0A0B4J1R6;B3KSI4;B4E022;V9HWD9;Q53EM5;P29401;B3KPZ8;B4DVU1	Transketolase	TKT
27.6805	27.9995	28.0713	28.5562	28.7042	28.3928	3156700	4263600	3888500	1390400	2827200	1513400	5	1.87237	-0.633998	B4E2A4;Q5M775;A0A024QYY9;B4DW07;J3KSG2;B4DQ24;B4DIW7	B4E2A4;Q5M775;A0A024QYY9;B4DW07;J3KSG2;B4DQ24;B4DIW7	Cytospin-B	SPECC1
24.0422	22.4105	22.5327	24.3986	23.6944	22.8013	731290	135420	182720	33750	0	58269	3	0.382685	-0.636286	P43686;A8K2M0	P43686;A8K2M0	26S protease regulatory subunit 6B	PSMC4
26.4534	26.2377	25.6951	26.8779	27.171	26.261	2533100	1251000	951030	1009400	883960	450220	10	0.849971	-0.641255	D3DUJ0;Q9Y4W6;Q8TA92;K7EP56	D3DUJ0;Q9Y4W6;Q8TA92	AFG3-like protein 2	AFG3L2
24.8772	25.1516	25.3141	25.6505	25.6246	25.9966	2257000	1801500	2260600	866120	982170	1044100	4	1.67109	-0.642974	Q6FI35;Q6FHF5;P12004;B4DUA2	Q6FI35;Q6FHF5;P12004	Proliferating cell nuclear antigen	PCNA
32.3945	32.3766	33.0187	33.2806	32.8513	33.5931	1192400000	1205200000	1344700000	611610000	408990000	654030000	2	1.00428	-0.645065	Q99878;Q96KK5;A3KPC7;Q9BTM1;Q16777;A0A024RAS2;Q6FI13;P20671;P0C0S8;B2R5B3;A4FTV9;A0A0U1RR32;A0A0U1RRH7;H0YFX9;B4E0B3;B2R5B6;Q96QV6;P16104;Q8IUE6;V9GZN0;A2RUA4;REV__H0Y672;REV__Q6N028;REV__E7EQ67;REV__Q6ZS45;REV__Q7Z5E6;REV__H7BY63;REV__A0A087X2A7;REV__Q6P9G8;REV__Q8NB25	Q99878;Q96KK5;A3KPC7;Q9BTM1;Q16777;A0A024RAS2;Q6FI13;P20671;P0C0S8;B2R5B3;A4FTV9;A0A0U1RR32;A0A0U1RRH7;H0YFX9;B4E0B3;B2R5B6;Q96QV6;P16104	Histone H2A type 1-J;Histone H2A type 1-H;Histone H2A;Histone H2A.J;Histone H2A type 2-C;Histone H2A type 2-A;Histone H2A type 1-D;Histone H2A type 1;Histone H2A type 1-A;Histone H2A.x	HIST1H2AJ;HIST1H2AH;H2AFJ;HIST2H2AC;HIST2H2AA3;HIST1H2AD;HIST1H2AG;HIST1H2AK;HIST1H2AA;H2AFX
25.9108	26.1685	26.7048	26.6834	26.8107	27.2989	376040	465030	763220	304570	175340	308380	11	1.04936	-0.669658	D6W5C0;Q01082;B2ZZ89;A0A087WUZ3;K9MS24;F8W6C1;B4DIF8	D6W5C0;Q01082;B2ZZ89;A0A087WUZ3;K9MS24	Spectrin beta chain, non-erythrocytic 1	SPTBN1
28.6952	24.9466	25.3336	26.7608	27.1053	27.1222	27340000	585020	970050	2324400	907560	1153300	3	0.218404	-0.670923	Q96K68;P01876;Q9UP60;Q8NCL6;Q6MZW0;Q6ZW64;Q96DK0;Q8WY24;Q6N090;Q6N092;Q6MZV6;A0A0G2JMB2;Q9NPP6;Q6P089;Q7Z374;Q9ULB6;S4R460;A2J1N4;A0A0B4J2B5;A0A068LRX1;Q9UL87;A0A068LKQ7;A2NWX2;Q0ZCH8;P01766;A0A075B7F0;Q0ZCH7;A0A0C4DH32;Q0ZCG0;Q0ZCF9;P0DP04;P01782;A0A0B4J1X8;A0N5G2;Q9UL71;B6EDE2	Q96K68;P01876;Q9UP60;Q8NCL6;Q6MZW0;Q6ZW64;Q96DK0;Q8WY24;Q6N090;Q6N092;Q6MZV6;A0A0G2JMB2;Q9NPP6;Q6P089;Q7Z374	Ig alpha-1 chain C region	IGHA1;SNC73;DKFZp686J11235;DKFZp686G21220;DKFZp686K18196;DKFZp686L19235;IGH@;DKFZp686C02218
29.5103	27.674	27.0951	28.3762	28.5723	29.3662	22018000	3366300	2500300	3135600	2320800	4950000	4	0.358514	-0.678482	Q08188	Q08188	Protein-glutamine gamma-glutamyltransferase E;Protein-glutamine gamma-glutamyltransferase E 50 kDa catalytic chain;Protein-glutamine gamma-glutamyltransferase E 27 kDa non-catalytic chain	TGM3
23.2943	23.1521	23.1472	24.7164	23.2897	23.6287	655240	357540	420890	82966	0	128130	2	0.718402	-0.680351	D6RAD4;P50613;A0A0S2Z3F9;D6RFL0;D6RGG9;D6RI01;D6R9Z2;D6RF14;D6RIG9;A0A0D9SFW9;D6REC6;D6R9G1	D6RAD4;P50613;A0A0S2Z3F9;D6RFL0;D6RGG9;D6RI01;D6R9Z2;D6RF14;D6RIG9;A0A0D9SFW9;D6REC6;D6R9G1	Cyclin-dependent kinase 7	CDK7
26.0649	26.0145	26.5798	27.401	26.0319	27.2744	4002100	3270600	3642500	3158800	1113300	2146000	7	0.653398	-0.682702	F8W0Q9;Q8NEY8;F8VPY7;F8VWU8;F8WF16;B7Z615;B7Z8L1;F8W6A0;B7Z8M9;B7Z695;F8VRK2	F8W0Q9;Q8NEY8;F8VPY7;F8VWU8;F8WF16;B7Z615;B7Z8L1;F8W6A0;B7Z8M9;B7Z695	Periphilin-1	PPHLN1
25.0664	25.3206	25.1591	25.602	25.9462	26.0467	875710	561640	462600	448340	521380	457050	3	1.94608	-0.682933	Q8NHX6;Q53HJ4;P25205;B2R7C5;A0A0S2Z4T1;A0A0S2Z492;B4DS46;B4DUQ9;J3KQ69	Q8NHX6;Q53HJ4;P25205;B2R7C5;A0A0S2Z4T1;A0A0S2Z492	DNA replication licensing factor MCM3	HCC5;MCM3
26.1655	25.9116	26.0506	26.5278	26.9628	26.7236	3015700	2571700	3815600	1860900	1753100	1948700	9	2.0554	-0.695517	Q9Y383;B3KSL5;A0A0A6YYJ8;B3KRR1;Q1W6G4;Q9NQ29;Q53G47;Q75M91;V9GZ75;F8WEU3;B8ZZ10;A8MYV2;D3DU41;F8WBC1;F2Z322;B8ZZ09;B3KSP8	Q9Y383;B3KSL5;A0A0A6YYJ8;B3KRR1	Putative RNA-binding protein Luc7-like 2	LUC7L2
22.8193	22.4	23.062	23.5641	22.4582	24.4142	216620	111110	206580	0	0	0	2	0.528525	-0.718419	Q86XI8;A0A087WWL5	Q86XI8;A0A087WWL5	Uncharacterized protein C19orf68	C19orf68
26.5032	26.4448	26.5081	26.9803	27.0002	27.6433	8063600	5385400	9023200	3999100	2873200	5512600	5	1.52556	-0.72258	Q9NY12;A0A024RDJ3	Q9NY12;A0A024RDJ3	H/ACA ribonucleoprotein complex subunit 1	GAR1
26.7961	26.6871	25.5617	26.8698	27.3353	27.0171	6077600	2203800	694690	1934600	1514900	1639600	10	0.803102	-0.725778	Q13867;J3KSD8;K7ES02;B4DXF3;K7ESE8;J3KS79;K7ENH5	Q13867;J3KSD8;K7ES02;B4DXF3;K7ESE8	Bleomycin hydrolase	BLMH
30.0342	29.6059	30.0466	30.6512	30.5358	30.6823	7855600	4468600	6630400	4659800	3019400	3544900	66	2.06306	-0.72754	Q5HY54;P21333;Q60FE6;Q60FE5;A6NDY9;A0A087WWY3;Q8TES4;Q6NXF2;Q96C61;B4E2F9;F8WE98;B4DTD5;Q86TQ3;H0Y5F3;H0Y5C6;Q2VP91;Q14315;H7C2E7	Q5HY54;P21333;Q60FE6;Q60FE5;A6NDY9;A0A087WWY3;Q8TES4	Filamin-A	FLNA;FLJ00119
28.0406	28.2194	28.328	29.0438	28.941	28.8225	7850500	6135000	7039300	4945000	2837700	2118700	22	2.66331	-0.739791	B9A067;Q16891;C9J406;B4DS66;B4DQY2;B4DKR1;H7C463;B4DT20;Q3B7X4;A0A087WYS0;Q05DN3;B4E2B5;D6RAW4	B9A067;Q16891;C9J406;B4DS66;B4DQY2;B4DKR1;H7C463;B4DT20	Mitochondrial inner membrane protein	IMMT
26.6442	26.6576	27.1452	27.5132	27.641	27.5173	14209000	8781900	11192000	5483400	4797900	5805600	4	1.91856	-0.741515	Q2TNI1;Q03135;E9PCT5;A9XTE5;Q59E85;C9JKI3;Q7Z4F3;A0A024R757;A0A1I9UVK8;P56539;A0A024R2D8	Q2TNI1;Q03135;E9PCT5;A9XTE5;Q59E85;C9JKI3;Q7Z4F3;A0A024R757	Caveolin;Caveolin-1	CAV1
27.7187	26.8906	26.2782	28.3079	28.8442	25.99	4834200	2181600	1126200	3090800	3352600	348210	21	0.317117	-0.751488	P40939;E9KL44;B4DRH6;B4DDZ5;H0YFD6	P40939;E9KL44;B4DRH6;B4DDZ5	Trifunctional enzyme subunit alpha, mitochondrial;Long-chain enoyl-CoA hydratase;Long chain 3-hydroxyacyl-CoA dehydrogenase	HADHA
25.6719	22.7935	25.702	25.6809	25.2863	25.4745	5125600	1509000	2324100	2124400	1171400	632500	3	0.319974	-0.758123	C9JYI4;Q5BKZ2;P52294;C9J352;C9JWD9;F2Z3G4;C9J4U1;B3KXZ2;B3KWR2;O15131	C9JYI4;Q5BKZ2;P52294;C9J352;C9JWD9;F2Z3G4;C9J4U1	Importin subunit alpha;Importin subunit alpha-5	KPNA1
24.1377	23.6182	24.2188	24.4772	24.613	25.1671	474230	292810	454620	196480	92696	192270	3	1.26282	-0.76083	B7ZAL5;E7EQB2;B3KSL2;E7ER44;Q2TUW9;V9HWI4;P02788;W8QEY1;Q5EK51;B3VMW0;A0A161I202;B4E1V0;A8K494;B2MV14;Q8IX02;Q19KS2	B7ZAL5;E7EQB2;B3KSL2;E7ER44;Q2TUW9;V9HWI4;P02788;W8QEY1;Q5EK51;B3VMW0;A0A161I202;B4E1V0;A8K494;B2MV14	Lactotransferrin;Lactoferricin-H;Kaliocin-1;Lactoferroxin-A;Lactoferroxin-B;Lactoferroxin-C	LTF
23.1546	23.0296	24.1736	24.2771	24.2979	24.0823	177870	315760	574000	328890	231850	195650	2	0.973976	-0.766508	A0PJ71;O60934;A8K1D3;A6H8Y5;V9PBC6;E2QRP0;E5RGU1;A0A0C4DG07	A0PJ71;O60934;A8K1D3;A6H8Y5;V9PBC6;E2QRP0;E5RGU1;A0A0C4DG07	Nibrin	NBN
29.772	29.6912	30.0032	30.5779	30.8807	30.3378	16053000	13641000	14594000	18584000	17226000	16199000	5	1.88037	-0.776683	Q9H307;A8K964;G3V5F0;G3V579;B4E392;B4DTD4	Q9H307;A8K964	Pinin	PNN
29.8796	27.3118	26.9796	28.1244	28.7171	29.6837	23488000	3178200	2331600	1782300	1867000	6121700	36	0.313592	-0.784723	A0A024R952;Q13835;Q14BN3;B4DRX5	A0A024R952;Q13835;Q14BN3	Plakophilin-1	PKP1
23.0312	24.5238	24.2965	24.9903	24.758	24.5088	0	2448700	1953900	1552300	1254100	987840	2	0.761021	-0.801901	Q8N9Q2	Q8N9Q2	Protein SREK1IP1	SREK1IP1
27.7605	28.1348	28.0311	28.838	28.856	28.6405	7830900	9870000	9498100	7747000	5457500	4034600	1	2.44213	-0.802693	Q9NVX2;A0A0A0MRH0;K7EN33;K7ERN7	Q9NVX2;A0A0A0MRH0;K7EN33	Notchless protein homolog 1	NLE1
24.231	23.9823	24.394	24.8625	25.0589	25.1102	1798200	932760	998920	474060	292650	325660	5	2.33248	-0.808129	A0A0D9SF63;Q9BZK7;B7Z475;A0A1B0GUU2;F8W9D8;C9IYU9;A0A068L529;C9JLJ1;C9JCK0;C9JBN1;A0A0D9SF25;A0A1B0GVH3;C9JCW4;C9JTW8;C9JY82;C9JEC9;C9J3H2;C9J903;A0A0D9SEW5;A0A0D9SFS8;C9J7E1;B4DP68;Q9BQ87;A0A024R189;Q59F53;O60907;A0A024RBV9	A0A0D9SF63;Q9BZK7;B7Z475;A0A1B0GUU2;F8W9D8;C9IYU9;A0A068L529	F-box-like/WD repeat-containing protein TBL1XR1	TBL1XR1
25.421	25.6804	25.4259	26.1187	26.6919	26.1459	780110	468890	572920	369130	418560	207500	5	1.77124	-0.809744	J3KQ96;Q13428;E7ETY2;B4DRA2;H0YA99;B4DLB1;Q59FZ2;Q9UFD4	J3KQ96;Q13428;E7ETY2;B4DRA2	Treacle protein	TCOF1
24.3813	25.2497	24.8678	25.8525	25.7851	25.3121	411910	375070	349770	417900	281420	160160	4	1.26358	-0.816974	Q86V48;A0A024RAC0	Q86V48;A0A024RAC0	Leucine zipper protein 1	LUZP1
28.9633	28.9835	29.4143	30.058	29.628	30.1338	19263000	14360000	26701000	14194000	8211300	13005000	17	1.71996	-0.819542	Q9BSV4;P23246;Q86VG2;Q6PIX2;H0Y9K7	Q9BSV4;P23246;Q86VG2;Q6PIX2	Splicing factor, proline- and glutamine-rich	SFPQ
22.9232	24.486	24.5147	24.8534	24.6068	24.9256	729360	966880	1229000	699120	252790	587960	3	0.699965	-0.820641	Q15072	Q15072	Zinc finger protein OZF	ZNF146
25.8217	24.8189	24.4921	25.6319	26.1317	25.858	3233100	1274100	974940	824070	1181200	988400	6	0.910578	-0.829633	P25311;A0A140VK00;C9JEV0;A0JLQ0	P25311;A0A140VK00;C9JEV0	Zinc-alpha-2-glycoprotein	AZGP1
22.8613	22.6304	22.4802	22.9277	24.1805	23.3548	489680	292280	268930	0	0	0	2	1.01483	-0.830404	A0A0S2Z4A8;Q7KYX9;B4E162;A0A0S2Z4A1;Q96I60;A0A0S2Z4I1;P08237;A0A024R0Y5;P78457;Q7Z683;F8VP00	A0A0S2Z4A8;Q7KYX9;B4E162;A0A0S2Z4A1;Q96I60;A0A0S2Z4I1;P08237;A0A024R0Y5;P78457;Q7Z683;F8VP00	6-phosphofructokinase;6-phosphofructokinase, muscle type	PFKM;DKFZp779O048
22.52	24.8626	24.6817	24.7834	24.8628	24.9327	0	1486200	1402600	717990	585910	700350	2	0.483518	-0.838188	O95816;B3KN59;B3KM36	O95816;B3KN59;B3KM36	BAG family molecular chaperone regulator 2	BAG2
32.3294	30.5207	30.6162	31.7186	31.5846	32.7072	130590000	21252000	30564000	29228000	22107000	45024000	19	0.546643	-0.848014	P14923;A0A0S2Z487;A0A024R1X8;C9J826;C9JK18;C9JKY1;C9JTX4;A0A0S2Z495;Q7KZ86;C9JPI2;K7ERP3	P14923;A0A0S2Z487;A0A024R1X8	Junction plakoglobin	JUP
24.5911	24.2062	24.1267	25.2973	25.0876	25.1111	1209000	934300	948110	363350	253620	369940	5	2.2521	-0.857302	Q6I9S2;Q13573;G3V3A4;B4DEG7;G3V4X8;B7Z9X2;B4DY36;A0A024R6E3;Q9ULA6;Q6P151;Q0D2M5;G3V5R3	Q6I9S2;Q13573;G3V3A4;B4DEG7;G3V4X8;B7Z9X2;B4DY36;A0A024R6E3;Q9ULA6;Q6P151	SNW domain-containing protein 1	SNW1
26.7058	26.0516	26.2834	27.1481	27.1188	27.3784	2019300	1532300	1936800	1446800	1526600	1386000	1	1.8517	-0.868187	Q5T9A4;Q9H834;Q8N3E6	Q5T9A4;Q9H834;Q8N3E6	ATPase family AAA domain-containing protein 3B	ATAD3B;DKFZp761L1023
27.7774	27.3871	26.8589	27.9687	28.1978	28.4923	9451900	5176500	2971000	3431300	2566000	3067000	16	1.34157	-0.878508	P04040;B4DWK8;Q8TAK2;A0A1C9J7V9	P04040;B4DWK8	Catalase	CAT
28.8239	28.8727	28.8751	29.6918	29.974	29.5498	12873000	10073000	11612000	9349100	8434700	7295600	16	2.66058	-0.881308	Q14978;B2RAU8;A0A0A0MRM9;Q96J17;S4R402;S4R341;S4R349;S4R3C2	Q14978;B2RAU8;A0A0A0MRM9;Q96J17	Nucleolar and coiled-body phosphoprotein 1	NOLC1
25.4247	23.2357	23.2774	24.5579	25.0714	24.9848	2285800	374580	263330	415350	284080	335810	7	0.530977	-0.892106	B4DE91;P49189;B4DX14;B9EKV4;B4DYY1	B4DE91;P49189;B4DX14;B9EKV4;B4DYY1	4-trimethylaminobutyraldehyde dehydrogenase	ALDH9A1
36.7478	36.7059	36.3732	37.495	37.2655	37.7606	2893200000	2698600000	1630600000	1435900000	1075600000	1673100000	1	2.07395	-0.898094	P35908;H0YID6;CON__REFSEQ:XP_932229	P35908	Keratin, type II cytoskeletal 2 epidermal	KRT2
24.8868	24.6201	24.6755	26.3972	27.0672	23.4334	1711200	646120	547340	2154000	2251200	97743	7	0.333398	-0.905177	P43897;E5KS95;B4DHY8;C9JT21;C9JG32;F8VPA7;F8VS27;F8WCK2	P43897;E5KS95;B4DHY8;C9JT21	Elongation factor Ts, mitochondrial;Elongation factor Ts	TSFM
24.7651	23.9079	24.6291	25.8802	25.7723	24.4379	619230	296710	143970	769010	443970	140020	7	0.803695	-0.92944	A8K5W7;Q9NSE4	A8K5W7;Q9NSE4	Isoleucine--tRNA ligase, mitochondrial	IARS2
22.7393	22.9113	22.958	22.9921	24.1974	24.2355	116420	89437	105240	0	0	0	2	1.06673	-0.938822	Q92896;Q6ZMF1;H3BM42	Q92896;Q6ZMF1;H3BM42	Golgi apparatus protein 1	GLG1
25.4072	24.7474	24.895	26.026	26.2528	25.5974	2302800	1074600	985580	964010	1039800	566940	5	1.56314	-0.942186	Q16698;A0A024R9D7;E5RJG7;Q7LDK6;E5RFV2;E5RJD2;E5RID6;H0YAW3	Q16698;A0A024R9D7;E5RJG7;Q7LDK6;E5RFV2;E5RJD2	2,4-dienoyl-CoA reductase, mitochondrial	DECR1;DECR
34.7934	34.6599	34.3657	35.7445	35.6766	35.238	1233100000	782110000	655270000	811570000	559930000	551260000	27	2.02036	-0.946687	P05783;B2RA03;A0A024RAY2;F8VZY9;I6L965;CON__H-INV:HIT000015463	P05783;B2RA03;A0A024RAY2;F8VZY9;I6L965	Keratin, type I cytoskeletal 18	KRT18
24.6125	24.1944	23.8563	25.5752	25.7955	24.1346	1888200	1024800	447160	645370	869970	220080	4	0.772586	-0.94735	Q53SW4;Q7Z518;O95299;A8K413;A0A087WXC5;A0A024R4B3;E7ESZ7;H7C2W5;H7C1Y7;H7C2X4;Q8N1B9;Q59FM0;C9J6X0	Q53SW4;Q7Z518;O95299;A8K413;A0A087WXC5;A0A024R4B3;E7ESZ7;H7C2W5;H7C1Y7;H7C2X4	NADH dehydrogenase [ubiquinone] 1 alpha subcomplex subunit 10, mitochondrial	NDUFA10
22.5436	22.6843	22.7985	23.5412	23.9568	23.4224	155260	121470	148060	17075	0	0	2	2.25045	-0.964628	B4DSV5;B3KXZ4;H0Y8E6;P49736;B7Z8Z6;Q9BWF4	B4DSV5;B3KXZ4;H0Y8E6;P49736;B7Z8Z6;Q9BWF4	DNA replication licensing factor MCM2	MCM2
25.3706	25.0411	25.6267	26.4529	26.4674	26.0145	8913900	6400000	9110600	9072300	5922100	5027500	2	1.89227	-0.965485	F8WD88;P49450	F8WD88;P49450	Histone H3-like centromeric protein A	CENPA
24.1822	20.8542	24.6693	24.1325	24.207	24.2683	1442300	1061100	2376000	877810	449790	481920	3	0.332402	-0.967393	H3BUL5;H3BVF8;H3BQG1;B3KUU7;A8K7G8;Q59FC5;P49761;B3KRI8;B4DWU9;B3KVF3	H3BUL5;H3BVF8;H3BQG1;B3KUU7;A8K7G8;Q59FC5;P49761;B3KRI8;B4DWU9	Dual specificity protein kinase CLK3	CLK3
25.6548	25.1566	24.3711	26.6096	26.2535	25.234	4980100	1553600	1158400	3145200	2012000	740670	5	0.807728	-0.971545	P48047;Q53HH2;H7C0C1;H7C086	P48047;Q53HH2;H7C0C1	ATP synthase subunit O, mitochondrial	ATP5O
26.4982	25.9804	25.2811	27.0678	27.1829	26.46	4591100	1702100	1238200	1928200	1565600	733610	9	1.10683	-0.983684	P55084;B5MD38;F5GZQ3;B4DY96;D6W539;B4DDC9;C9K0M0;C9JEY0;C9JE81;Q92799	P55084;B5MD38;F5GZQ3;B4DY96;D6W539;B4DDC9	Trifunctional enzyme subunit beta, mitochondrial;3-ketoacyl-CoA thiolase	HADHB
22.8926	26.0464	25.9784	25.9275	26.1233	25.8573	2243400	1798200	4506900	1383900	1236500	1104100	4	0.405216	-0.99692	B4DXG8;D6RIY6;Q06265;A5PLM5;D6R905;D6RAP4;D6RA17;H0Y9L5	B4DXG8;D6RIY6;Q06265;A5PLM5;D6R905;D6RAP4;D6RA17	Exosome complex component RRP45	EXOSC9
27.8264	27.6676	28.2586	28.5928	29.0137	29.1409	20041000	14064000	28333000	9966500	8608400	13318000	7	1.83633	-0.998263	Q86V81;E9PB61	Q86V81;E9PB61	THO complex subunit 4	ALYREF
22.8779	22.5654	23.2077	24.0636	23.648	23.9858	282610	195610	331540	0	0	0	2	1.96943	-1.01545	A0A087WU06;B4DYP7;Q96CW5	A0A087WU06;B4DYP7;Q96CW5	Gamma-tubulin complex component 3	TUBGCP3
26.7927	26.8693	27.3292	28.1533	27.7408	28.1457	4062500	2093200	5217400	3287100	1611000	2289400	12	2.03308	-1.01626	O75400;B4DPY2;Q05C41;F5H578;Q4ZG51;H0YG38;H7C2N3	O75400;B4DPY2	Pre-mRNA-processing factor 40 homolog A	PRPF40A
25.5654	24.8247	24.8581	26.4448	26.5243	25.4008	1001600	500630	204030	978750	750170	333140	6	1.12451	-1.04053	O76031;A0A024R5X7;Q9H072;H0YK07;H0YM48	O76031;A0A024R5X7;Q9H072	ATP-dependent Clp protease ATP-binding subunit clpX-like, mitochondrial	CLPX;DKFZp586J151
28.1613	28.2506	27.5951	29.0455	28.9641	29.1375	16706000	15399000	8543100	12606000	7683700	9120000	11	2.11124	-1.04667	P05089	P05089	Arginase-1	ARG1
30.7641	29.8616	29.5152	30.7932	30.794	31.6949	72809000	19167000	14186000	14655000	13196000	26985000	33	1.0278	-1.04711	Q02413;P32926;A0A024RC30;Q86SJ6	Q02413	Desmoglein-1	DSG1
24.102	23.7238	23.7635	25.4286	25.0307	24.3527	1549100	732310	855000	1676200	1077800	617940	3	1.48077	-1.07425	J3QKT4;P32322;E7D7Y0;E7D7X9;A0A1B2JLU7;A0A024R8U9;Q8TBX0;Q2TU78;J3QL24;B7Z8T1;J3KQ22;E2QRB3;J3KSA9;J3QR88;J3QLK9;J3QL23;B3KMB7;J3QL32;A0A087WTV6;A0A024R3Q9;Q4W8W1;A0A087WZR9;Q96C36;A0A0S2Z5U6;J3KR12;B4DQK8	J3QKT4;P32322;E7D7Y0;E7D7X9;A0A1B2JLU7;A0A024R8U9;Q8TBX0;Q2TU78;J3QL24;B7Z8T1;J3KQ22;E2QRB3	Pyrroline-5-carboxylate reductase;Pyrroline-5-carboxylate reductase 1, mitochondrial	PYCR1;PIG45
26.1624	25.5951	25.3709	26.6274	26.4422	27.3093	1852600	727400	603750	741410	423050	980870	9	1.42624	-1.08351	Q14574;A8K6T3;A0A024RC29;J3QRL9;Q9HAX1	Q14574;A8K6T3;A0A024RC29	Desmocollin-3	DSC3
25.273	24.8413	24.4891	26.7461	26.1875	24.9841	1025600	714710	453420	2360300	1966000	228500	7	0.909204	-1.10475	B4DJB4;Q53GF8;P50213;H0YL72;B4DSY4;B7Z9J8;H0YM46;H0YNF5;H0YKD0;H0YLI6;H0YMU3;H0YM64	B4DJB4;Q53GF8;P50213;H0YL72;B4DSY4;B7Z9J8	Isocitrate dehydrogenase [NAD] subunit alpha, mitochondrial	IDH3A
29.7768	29.2408	28.6576	30.0611	29.9946	30.9995	18360000	9384900	7110900	8989100	6997400	14621000	22	1.15692	-1.12669	Q9HB00;Q08554	Q9HB00;Q08554	Desmocollin-1	DSC1
26.1863	25.8244	25.6654	27.058	27.6836	26.364	7325800	3515300	4006700	4856900	4888400	2145400	7	1.30295	-1.14316	Q6FH36;O43447;C9JQD4;Q6FH57;H0YEL5	Q6FH36;O43447;C9JQD4;Q6FH57;H0YEL5	Peptidyl-prolyl cis-trans isomerase;Peptidyl-prolyl cis-trans isomerase H	PPIH
22.5722	22.57	22.8283	23.3305	23.5923	24.4947	447170	311880	417070	87370	0	0	2	1.46871	-1.14902	B4DY52;A6PW57;Q99755;A2A3N6;P78517;B2R729	B4DY52;A6PW57;Q99755;A2A3N6;P78517;B2R729	Phosphatidylinositol 4-phosphate 5-kinase type-1 alpha;Putative PIP5K1A and PSMD4-like protein	PIP5K1A;PIPSL
30.2526	29.4291	29.0355	30.986	31.0519	30.1648	41920000	16217000	13890000	23267000	19897000	11542000	23	1.19181	-1.16185	V9HW26;P25705;K7EK77;B4DGW3;K7ERX7;K7EJP1;K7ENJ4;K7EQH4;K7ESA0	V9HW26;P25705;K7EK77;B4DGW3;K7ERX7	ATP synthase subunit alpha, mitochondrial	ATP5A1
22.3394	22.65	22.6127	24.2442	23.4839	23.3656	165610	89381	89518	34633	21152	21071	1	1.78649	-1.16386	B4DTP3;H0YM23;O75179;H0YLQ3;B4DR08;A0A1W2PQ15	B4DTP3;H0YM23;O75179;H0YLQ3;B4DR08	Ankyrin repeat domain-containing protein 17	ANKRD17
26.2366	26.175	26.5899	27.5755	27.2005	27.8358	17243000	12104000	19459000	13696000	7583700	12214000	2	2.22849	-1.20343	Q93077;Q7L7L0;Q08AJ9;P04908;A0A024R017	Q93077;Q7L7L0;Q08AJ9;P04908;A0A024R017	Histone H2A type 1-C;Histone H2A type 3;Histone H2A;Histone H2A type 1-B/E	HIST1H2AC;HIST3H2A;HIST1H2AB
26.498	25.5193	24.6496	27.2322	27.4226	25.6311	2342900	821230	260540	1167900	1218700	523410	11	0.706227	-1.20634	Q53HR2;P49748;B4DEA8;B3KPA6;B3KPX1;J3QRJ8;B4DYY0;G3V1M7;K7EJW8;K7EQP4;K7EMF8;A0A077H1I5;J3KS89;J3QKU9	Q53HR2;P49748;B4DEA8;B3KPA6	Very long-chain specific acyl-CoA dehydrogenase, mitochondrial	ACADVL
29.6604	28.7145	28.0313	30.3695	30.5172	29.1647	41650000	12082000	8645900	26042000	17810000	8277900	17	0.888095	-1.21506	Q0QEN7;V9HW31;P06576;H0YH81;F8W079;F8W0P7;H0YI37	Q0QEN7;V9HW31;P06576;H0YH81;F8W079	ATP synthase subunit beta;ATP synthase subunit beta, mitochondrial	ATP5B
28.7718	28.7555	28.9205	29.8675	30.0383	30.2294	10474000	5922900	8831100	8541000	7591700	8947300	18	3.33356	-1.22914	Q9Y2W1;Q7Z5U1;Q05D20;Q6P0P7;Q6PJV4	Q9Y2W1	Thyroid hormone receptor-associated protein 3	THRAP3
24.2748	24.6244	25.3808	26.2503	25.4105	26.3104	1580100	2371400	4418100	3341400	1350800	2236300	4	1.31855	-1.23041	P61626;B2R4C5;F8VV32;A0A0B4J259	P61626;B2R4C5;F8VV32;A0A0B4J259	Lysozyme C	LYZ
27.0833	25.9085	25.6636	27.1339	27.3309	27.9776	4334900	1380400	1524000	1695300	1328400	2300800	2	1.17096	-1.26233	Q6UWP8	Q6UWP8	Suprabasin	SBSN
23.633	23.362	22.7483	25.4267	24.335	23.769	469190	237410	95872	636450	479910	152720	3	1.07427	-1.26246	Q9BXW7;A8MYZ9;B3KVW8	Q9BXW7	Cat eye syndrome critical region protein 5	CECR5
26.2415	25.0793	24.7576	27.0512	26.8148	26.0348	9142900	2821300	1033100	6012900	3646300	1924500	6	1.09852	-1.27413	V9HW35;P30044	V9HW35;P30044	Peroxiredoxin-5, mitochondrial	PRDX5
25.0238	25.2097	25.1792	25.8566	26.4799	26.9266	4745100	4151600	4150700	2704400	3627600	5816000	4	1.81653	-1.28349	X6R700;Q9Y3Y2;A0A087X1B7;Q5T7Y7	X6R700;Q9Y3Y2;A0A087X1B7	Chromatin target of PRMT1 protein	CHTOP
25.0026	25.079	24.7962	26.4658	26.3774	25.905	2358300	1088100	1045100	2247900	1576900	698470	7	2.58013	-1.29014	A0A024RD99;B7Z2D8;B7Z5F9;B3KP14;H0Y8R1;F5H5I6;B7Z3R7;H0YAK1;B3KW50;Q12849;H0YAM1	A0A024RD99;B7Z2D8;B7Z5F9;B3KP14;H0Y8R1;F5H5I6;B7Z3R7;H0YAK1;B3KW50;Q12849	G-rich sequence factor 1	GRSF1
26.0254	25.9427	25.1864	27.3313	27.4169	26.2991	1522100	800220	470240	1826900	1403500	587200	12	1.35519	-1.29761	B2RD24;A0A087WVM4;Q6UB35;B7ZM99;Q4VXM0;Q4VXM1;Q4VXV2;Q8WX68;H0Y327	B2RD24;A0A087WVM4;Q6UB35;B7ZM99	Monofunctional C1-tetrahydrofolate synthase, mitochondrial	MTHFD1L
25.4558	26.2936	22.7971	26.0639	26.2795	26.1811	12443000	11479000	11633000	6896000	6747900	4275100	3	0.556724	-1.326	Q9UBI6;Q53GD1	Q9UBI6;Q53GD1	Guanine nucleotide-binding protein G(I)/G(S)/G(O) subunit gamma-12;Guanine nucleotide-binding protein subunit gamma	GNG12
28.0015	28.0638	28.0162	29.3259	29.6725	29.1729	25492000	19414000	19782000	23433000	19248000	14403000	6	3.10155	-1.36322	Q9NWB6;A0A024RDW4;B4E3J6;X6R9F1	Q9NWB6;A0A024RDW4;B4E3J6	Arginine and glutamate-rich protein 1	ARGLU1
28.1727	27.8085	27.2685	28.8467	28.9049	29.6131	16641000	10876000	8446800	11399000	9321000	16004000	8	1.72237	-1.37172	Q0EFA5;A8K9C1;A0A1U9X8Y9;A0A1U9X8X8;A0A1U9X8X5;Q2L6G8;Q15517;M1SWB8;G8JLG2;D2IYL2;A0A1U9X901;A0A1U9X8X6;A0A1U9X8Z0	Q0EFA5;A8K9C1;A0A1U9X8Y9;A0A1U9X8X8;A0A1U9X8X5;Q2L6G8;Q15517;M1SWB8;G8JLG2;D2IYL2;A0A1U9X901;A0A1U9X8X6;A0A1U9X8Z0	Corneodesmosin	S;CDSN
27.2041	26.849	26.2773	28.5853	28.5045	27.3697	2761000	1280200	996600	3148700	2343400	1598500	17	1.35086	-1.3764	P54886	P54886	Delta-1-pyrroline-5-carboxylate synthase;Glutamate 5-kinase;Gamma-glutamyl phosphate reductase	ALDH18A1
28.3295	28.1581	28.3102	29.7579	29.749	29.4241	9600200	6314100	7519300	10467000	7370700	6320200	16	3.44889	-1.37771	E9PK91;Q9NYF8;Q6DCA8;A0A1W2PQ43;E9PK09;E9PQN2;E9PKI6;E9PJA7;H0YF00;H0YF63;B0AZU3;H0YF14;B7Z8J9	E9PK91;Q9NYF8;Q6DCA8;A0A1W2PQ43;E9PK09;E9PQN2;E9PKI6;E9PJA7	Bcl-2-associated transcription factor 1	BCLAF1
27.4477	26.8304	25.7959	28.5392	28.6837	27.0168	7539000	4980300	3102100	10061000	9662100	2993900	13	0.901317	-1.38857	P38117;M0QY67	P38117	Electron transfer flavoprotein subunit beta	ETFB
23.3632	23.0632	22.8706	24.4926	25.4004	23.6286	980790	758980	385810	1030500	1109300	658470	3	1.24462	-1.40817	J3QLR8;Q9Y3D9	J3QLR8;Q9Y3D9	28S ribosomal protein S23, mitochondrial	MRPS23
25.7207	25.4176	25.9296	27.7941	27.2027	26.3035	2230700	1140400	2665700	4529200	2005300	1142900	8	1.43239	-1.41079	Q13501;E7EMC7;E3WH17;E9PFW8;C9JRJ8;E3W990;B4DE82;B4E3V2;Q13502;D6RBF1;C9J6J8	Q13501;E7EMC7;E3WH17;E9PFW8;C9JRJ8;E3W990;B4DE82	Sequestosome-1;Tyrosine-protein kinase receptor	SQSTM1;SQSTM1-ALK
30.6662	30.221	29.5191	31.8617	32.0272	30.8059	24387000	10430000	7074500	18028000	17265000	6389200	59	1.31826	-1.42946	Q5R210;Q5R208;P31327;A0A024R454;Q5R206;A8K134;Q5R209;Q5R207;Q5R211;B7ZAW0;Q05CV6;E7EWJ3;C9JTA4	Q5R210;Q5R208;P31327;A0A024R454;Q5R206;A8K134;Q5R209;Q5R207	Carbamoyl-phosphate synthase [ammonia], mitochondrial	CPS1
26.702	26.0351	25.1178	27.7387	27.8991	26.5548	3007700	1257300	637140	2171700	1639900	624480	9	1.08771	-1.44589	Q9BV61;Q59EK6;Q53G55;Q53FS6;Q12931;A0A140VJY2;K0A7K7;Q5CAQ4;I3L0K7;Q8N9Z3;I3L239;I3L2D5	Q9BV61;Q59EK6;Q53G55;Q53FS6;Q12931;A0A140VJY2;K0A7K7;Q5CAQ4;I3L0K7;Q8N9Z3	Heat shock protein 75 kDa, mitochondrial	TRAP1
24.6656	23.9634	23.2686	26.0093	25.8751	24.4399	765070	583530	249430	1297200	829810	290560	5	1.07687	-1.47558	A0A0B4J2A4;P42765;B3KNP8;B2RB23;K7EME0	A0A0B4J2A4;P42765;B3KNP8;B2RB23;K7EME0	3-ketoacyl-CoA thiolase, mitochondrial	ACAA2
28.2066	27.9642	27.1084	29.5012	29.6991	28.5365	3465700	1946100	1147400	3646000	2774500	813980	28	1.41284	-1.48585	P42704;E5KNY5;B4DSR0;A0A0C4DG06;B8ZZ38;C9JCA9;H7C3W8	P42704;E5KNY5;B4DSR0	Leucine-rich PPR motif-containing protein, mitochondrial	LRPPRC
26.5941	25.8215	25.3369	27.7667	27.875	26.6366	4895100	2272800	1758600	3896400	3588500	2139200	7	1.31034	-1.50859	P11177;C9J634;F8WF02;Q59G68	P11177;C9J634	Pyruvate dehydrogenase E1 component subunit beta, mitochondrial	PDHB
26.0606	25.6622	24.6629	27.5529	27.2843	26.0898	3133200	741770	699030	2967200	2192500	1310200	8	1.1624	-1.51377	P08559;A0A024RBX9;A5YPB6;Q53GE3;A5PHJ9;Q5JPU0;Q5JPU1;P29803;Q5JPT9;Q9UNV7;Q99725;Q99724;Q6LCA3;P78557;Q5JPU3;Q5JPU2	P08559;A0A024RBX9;A5YPB6;Q53GE3;A5PHJ9	Pyruvate dehydrogenase E1 component subunit alpha, somatic form, mitochondrial	PDHA1;PDHA1/LOC79064
27.6384	27.3393	26.3108	29.0369	28.9475	27.8637	5100200	2444300	827360	4726400	7627400	1564600	17	1.29247	-1.51983	P31040;A0A024QZ30;D6RFM5;B3KT34;Q0QF12;A0A087X1I3;B4DYN5;B3KYA5;B4DNB2;B7Z668;B7Z9R0;B7Z5M3;B7Z6J5	P31040;A0A024QZ30;D6RFM5;B3KT34;Q0QF12;A0A087X1I3;B4DYN5	Succinate dehydrogenase [ubiquinone] flavoprotein subunit, mitochondrial	SDHA
23.7577	23.9096	25.0004	25.3055	25.4723	26.4599	2675900	2215600	5447500	4706100	4144400	5411900	2	1.33955	-1.52332	Q6EZE9;P59666;P59665	Q6EZE9;P59666;P59665	Neutrophil defensin 3;HP 3-56;Neutrophil defensin 2;Neutrophil defensin 1;HP 1-56;Neutrophil defensin 2	DEFA3;DEFA1
25.942	24.9584	23.8793	26.6887	26.8343	25.9407	4642800	1306600	701730	3529700	1526500	1081000	5	1.1178	-1.56128	A0A0C4DGI3;B3KTN4;B4DJV2;O75390;A0A024RB75;F8W642;F8VZK9;F8VX07;F8VRP1;F8VX68;H0YIC4;F8VPF9;F8VPA1;F8VTT8;F8W1S4;F8W4S1;H0YH82;Q0QEL2;B7Z1E1;F8VWQ5;F8VRI6	A0A0C4DGI3;B3KTN4;B4DJV2;O75390;A0A024RB75	Citrate synthase;Citrate synthase, mitochondrial	CS
24.1809	25.0638	20.911	25.0553	25.0846	24.7085	1598100	2205300	471450	1008300	921480	773470	2	0.544904	-1.5642	B4DEH0;Q7Z7H8	B4DEH0;Q7Z7H8	39S ribosomal protein L10, mitochondrial	MRPL10
23.8506	22.7036	22.4853	25.2054	24.4961	24.0357	895920	161820	0	792920	583540	398340	2	1.34794	-1.56592	Q9BSH4;Q8N9Q7	Q9BSH4;Q8N9Q7	Translational activator of cytochrome c oxidase 1	TACO1;CCDC44
30.8141	30.3771	29.6014	32.2051	32.2739	31.0331	55229000	23502000	16939000	50488000	37548000	16134000	36	1.36934	-1.57314	B7Z4V2;V9HW84;P38646;Q8N1C8;B7Z1V7;B7Z4T3;A1XP52;D6RJI2;Q2F839;H0YBG6;D6RA73;H0Y8S0	B7Z4V2;V9HW84;P38646;Q8N1C8;B7Z1V7;B7Z4T3	Stress-70 protein, mitochondrial	HSPA9
28.3576	27.9238	26.7244	29.5328	29.7499	28.4457	10867000	4647900	1836500	7580200	7549000	1859700	20	1.16845	-1.57423	K7EJE8;K7EKE6;B3KU28;Q2VPA0;B3KXS5;P36776;E5KMI6;B4DPX0;K7ER27;A4VCH6;K7ER56;K7EQF8;K7ERR6	K7EJE8;K7EKE6;B3KU28;Q2VPA0;B3KXS5;P36776;E5KMI6;B4DPX0	Lon protease homolog, mitochondrial;Lon protease homolog	LONP1
28.6284	28.2116	27.3332	29.9445	30.1408	28.9301	14542000	7105300	3331600	14398000	12489000	4167400	15	1.40529	-1.61403	A0A024RB99;V9HW06;Q53ET4;P34897;B4E1G2;Q5HYG8;B4DW25;B4DJQ3;Q5BJF5;B4DJ63;B4DP88;B4DWA7;B4DLV4;H0YIZ0;G3V2Y4;G3V5L0;G3V4W5;G3V540;G3V241;G3V3Y8;G3V4T0;G3V4X0;G3V2W0;G3V2E4	A0A024RB99;V9HW06;Q53ET4;P34897;B4E1G2;Q5HYG8;B4DW25;B4DJQ3;Q5BJF5;B4DJ63;B4DP88;B4DWA7;B4DLV4;H0YIZ0;G3V2Y4	Serine hydroxymethyltransferase;Serine hydroxymethyltransferase, mitochondrial	SHMT2;DKFZp686P09201
25.2423	24.6657	24.9178	26.5526	26.8624	26.318	2564800	619370	902180	1815300	1809900	1288700	6	2.68802	-1.63578	B4DH16;Q68D27;F5GYT8;E9PG35;E9PHF7;Q96RQ3;A0A0S2Z693;G5E9X5;B4DHW5;B7ZAW3	B4DH16;Q68D27;F5GYT8;E9PG35;E9PHF7;Q96RQ3;A0A0S2Z693;G5E9X5;B4DHW5	Methylcrotonoyl-CoA carboxylase subunit alpha, mitochondrial	DKFZp686B20267;MCCC1
28.4421	28.2966	27.8199	29.6888	29.8837	29.946	28770000	16844000	13834000	26974000	21916000	18135000	13	2.90567	-1.65332	P67809;Q6PKI6;Q7KZ24;H0Y449;Q59EB5;A0JLU4;A0A024RAV4;Q2VIK8;P16989;A0A024RAQ1;C9J5V9;Q96GD7;Q9Y2T7;B2RCC2;A0A0D9SEI8;Q59HE1	P67809;Q6PKI6;Q7KZ24;H0Y449	Nuclease-sensitive element-binding protein 1	YBX1
27.4857	26.8588	25.9642	28.5898	28.9865	27.6934	8198600	2705800	1896500	8935400	6937000	2918800	14	1.32522	-1.65366	P11310;A0A0S2Z366;Q5T4U5;Q5HYG7;B7Z9I1;B4DWX6;B4DVB1;B4DJE7;B4DVE0;A0A0S2Z3A5;E9PJM9;E9PRX4;H0YDT5	P11310;A0A0S2Z366;Q5T4U5;Q5HYG7;B7Z9I1;B4DWX6;B4DVB1;B4DJE7;B4DVE0;A0A0S2Z3A5	Medium-chain specific acyl-CoA dehydrogenase, mitochondrial	ACADM;DKFZp686M24262
25.5961	24.6543	24.13	26.9631	27.1009	25.3119	2566700	1301900	977900	3857200	2328500	1134900	4	1.09171	-1.66517	Q6IAL5;B2R8A1;A8K4W7;P53597;B7Z438;H7C233	Q6IAL5;B2R8A1;A8K4W7;P53597;B7Z438	Succinyl-CoA ligase [ADP/GDP-forming] subunit alpha, mitochondrial	SUCLG1
29.895	29.5119	28.5499	31.3101	31.3884	30.2611	33073000	19819000	11182000	34627000	24860000	12402000	22	1.43489	-1.66763	P49411;H3BNU3	P49411	Elongation factor Tu, mitochondrial	TUFM
29.8352	29.6542	28.8973	31.3871	31.4753	30.5657	17112000	11068000	10095000	15770000	13039000	7220000	40	1.8351	-1.68049	P11498;A0A024R5C5;E9PRE7;E9PS68	P11498;A0A024R5C5	Pyruvate carboxylase, mitochondrial	PC
27.1281	26.3007	25.6777	28.5332	28.3706	27.2757	13484000	3668700	2723300	9855500	5828700	3450700	8	1.36974	-1.69097	Q99714;A0A0S2Z410;Q5H928;A0A0S2Z434	Q99714;A0A0S2Z410;Q5H928;A0A0S2Z434	3-hydroxyacyl-CoA dehydrogenase type-2	HSD17B10
27.1363	26.2046	25.5884	28.2704	28.5827	27.1908	8753500	2597300	1668400	6583600	6891000	1618100	9	1.29586	-1.7049	P30084	P30084	Enoyl-CoA hydratase, mitochondrial	ECHS1
27.7025	27.0991	26.2914	29.1399	29.0624	28.0105	11457000	2376600	2462700	12680000	7437900	3190600	12	1.4482	-1.70662	P13804;A0A0S2Z3L0;A0A0S2Z3M4;H0YLU7;H0YK49;H0YL12;H0YNX6;H0YKF0;H0YL83;J3KN60	P13804;A0A0S2Z3L0;A0A0S2Z3M4;H0YLU7;H0YK49;H0YL12;H0YNX6;H0YKF0	Electron transfer flavoprotein subunit alpha, mitochondrial	ETFA
26.8795	26.2166	25.4701	28.2322	28.356	27.1146	5866700	2410200	1120700	5293400	3784300	1607600	9	1.40681	-1.71219	P24752;A0A140VJX1;H0YEL7;E9PRQ6;E9PKF3	P24752;A0A140VJX1	Acetyl-CoA acetyltransferase, mitochondrial	ACAT1
26.5382	26.6465	25.6325	27.9436	28.2273	28.0776	47325000	35717000	17221000	47293000	41929000	40187000	3	2.26131	-1.81045	P62861;E9PR30	P62861;E9PR30	40S ribosomal protein S30	FAU
25.1832	24.5886	23.0722	26.4106	26.7135	25.1815	1286300	516810	196540	1432000	1174000	422840	6	1.09202	-1.82051	Q6IAV5;P55809;A0A024R040;E9PDW2;B7Z609;A1E286	Q6IAV5;P55809;A0A024R040;E9PDW2;B7Z609;A1E286	Succinyl-CoA:3-ketoacid-coenzyme A transferase;Succinyl-CoA:3-ketoacid coenzyme A transferase 1, mitochondrial	OXCT;OXCT1
24.0555	22.9037	22.8377	24.8604	26.3582	24.214	1453100	986550	344110	2288600	1937200	496290	4	1.18068	-1.87859	M0R208;Q16740;M0QYV5	M0R208;Q16740;M0QYV5	ATP-dependent Clp protease proteolytic subunit;Putative ATP-dependent Clp protease proteolytic subunit, mitochondrial	CLPP
28.1496	22.7623	28.5163	28.4069	28.4271	28.2426	18829000	12019000	12711000	6954900	4835600	4876000	2	0.433146	-1.88281	A6NHQ2	A6NHQ2	rRNA/tRNA 2-O-methyltransferase fibrillarin-like protein 1	FBLL1
26.086	22.2721	26.7015	26.6067	26.8832	27.2184	5651900	2382800	8049300	2841800	2171800	3103000	2	0.604027	-1.88288	B4DDB6;B4E3E6;Q65ZQ3;H7C1J8;Q66K53;Q8NFG3	B4DDB6;B4E3E6		HNRPA3
28.9698	28.2893	27.7151	30.3105	30.4891	29.8619	15450000	7400800	3836900	14490000	15189000	8621400	24	2.0145	-1.89577	P10809;A0A024R3X4;B3GQS7;B7Z597;B7Z5E7;B7Z4F6;Q53SE2;E7ESH4;E7EXB4;B7Z532;A0A0S2Z415;C9JL25;B9VPB4;B9VP19;Q53QD5;C9JCQ4;C9JL19;C9J0S9;B9VP24	P10809;A0A024R3X4;B3GQS7;B7Z597;B7Z5E7;B7Z4F6	60 kDa heat shock protein, mitochondrial	HSPD1
23.7305	23.58	23.0595	25.7846	25.9116	24.4452	619840	390780	211750	1059400	544030	83997	5	1.70507	-1.9238	B7ZAF6;B4DRV2;Q9P2R7;E5KS60;E5KS55;Q6N0B1;B4DY87;Q7Z503;B7Z9S6;Q5T9Q5;A0A0S2Z511;A0A0U1RQL1;A0A0U1RQF8;Q9Y4T0;A0A0U1RRI1;Q5T9Q8	B7ZAF6;B4DRV2;Q9P2R7;E5KS60;E5KS55;Q6N0B1;B4DY87;Q7Z503;B7Z9S6;Q5T9Q5;A0A0S2Z511	Succinyl-CoA ligase [ADP-forming] subunit beta, mitochondrial	SUCLA2;DKFZp686D0880
26.1435	25.8868	26.5175	27.651	28.1249	28.6716	11572000	7701500	15742000	16026000	17057000	22611000	4	2.32002	-1.96659	P81605	P81605	Dermcidin;Survival-promoting peptide;DCD-1	DCD
22.783	22.8231	22.2495	24.0014	25.5335	24.2737	311060	227900	139640	390040	418290	199320	3	1.76147	-1.98429	Q4G0N4;A0A0C4DGV3;A0A024R048;B7Z8V7	Q4G0N4;A0A0C4DGV3;A0A024R048;B7Z8V7	NAD kinase 2, mitochondrial	NADK2
23.7455	24.0987	24.3904	27.4002	26.7538	24.4355	125180	103660	133260	426080	164770	49506	9	1.08343	-2.1183	P25391;Q7Z5W6	P25391	Laminin subunit alpha-1	LAMA1
26.2417	26.3075	22.8067	27.7801	27.276	26.6873	2146700	2035000	513750	1486700	1585300	754090	13	0.823052	-2.12911	B4DZ08;Q99798;B2RBW5;A0A0K0K1H7;A2A274;B4DLY4;B4DJW1;B4DW08;B4DEC3;Q71UF1;O75944	B4DZ08;Q99798;B2RBW5;A0A0K0K1H7;A2A274;B4DLY4;B4DJW1;B4DW08;B4DEC3;Q71UF1	Aconitate hydratase, mitochondrial	ACO2
30.7186	25.5389	21.726	28.4023	27.4074	29.802	176270000	3841400	1669600	13764000	6453000	33917000	14	0.398872	-2.54275	Q9NZT1;Q53H37	Q9NZT1;Q53H37	Calmodulin-like protein 5	CALML5
24.5103	24.3846	22.3197	26.5526	26.7981	25.805	322320	190050	0	725150	1134900	235520	6	1.57848	-2.64702	Q96RP9;E5KND5;C9IZ01;E5KND7;D3DNL3;F8WAU4;Q9H9M0;A0A0S2Z5W5	Q96RP9;E5KND5;C9IZ01;E5KND7;D3DNL3;F8WAU4	Elongation factor G, mitochondrial	GFM1
24.1799	22.4388	24.2855	27.0892	26.3331	25.591	418870	144310	431590	1985100	812970	718570	9	1.66583	-2.70304	Q7Z417	Q7Z417	Nuclear fragile X mental retardation-interacting protein 2	NUFIP2
21.0218	28.0009	28.5742	29.3519	29.0569	29.3201	428970	337310	755110	1211900	330220	559440	2	0.625573	-3.37733	E9PHM6;F6QMI7;F8W9J4;Q03001;A0A0U1RQJ2	E9PHM6;F6QMI7;F8W9J4;Q03001;A0A0U1RQJ2	Dystonin	DST
22.412	23.4042	22.9471	27.2501	27.0428	26.1395	0	24078	27164	624390	428850	135310	9	3.02335	-3.88972	O94986;B4E1E7;A0A075B719;Q3B7A2	O94986	Centrosomal protein of 152 kDa	CEP152
29.2551	22.3823	22.4292	29.3097	29.2855	29.1602	115180000	117220000	115410000	38128000	29854000	26399000	1	0.93415	-4.56288	A8K3Q9	A8K3Q9

## Sheet: CENPC
CENPC_1	CENPC_2	CENPC_3	IgG_1	IgG_2	IgG_3	iBAQ CENPC_1	iBAQ CENPC_2	iBAQ CENPC_3	iBAQ IgG_1	iBAQ IgG_2	iBAQ IgG_3	Unique peptides	-Log t-test p value	t-test Difference	Protein IDs	Majority protein IDs	Protein names	Gene names
34.2377	33.3864	34.114	24.4287	21.8445	24.8873	420150000	227280000	495700000	834250	129060	1375100	81	3.31011	10.1925	Q03188;H0Y8J2;H0Y9W1	Q03188;H0Y8J2	Centromere protein C 1	CENPC1
30.4141	29.4714	30.4093	22.4721	21.8704	21.743	81159000	34222000	97162000	1463600	322350	555130	19	4.51072	8.06976	Q96H22;H3BMC7;D3DUK9;H3BMD5;H3BRU7	Q96H22	Centromere protein N	CENPN
31.2544	29.917	30.4798	22.7913	22.2329	22.5954	65500000	25794000	48232000	58417	20731	128730	24	4.34813	8.01054	Q92674;A0A024RCG4;B4DZL4;Q5JX01;Q5JX02	Q92674;A0A024RCG4;B4DZL4	Centromere protein I	CENPI
29.819	28.5777	29.4104	21.3475	21.6338	21.2106	59887000	26214000	61102000	355940	296620	336830	15	4.46702	7.8717	Q6IPU0;A0A087WTF1;Q7Z672;X6R9C8	Q6IPU0;A0A087WTF1;Q7Z672	Centromere protein P	CENPP;DKFZp779J2459
31.9839	31.2714	31.9435	24.2136	24.3176	23.1966	80930000	37732000	80563000	587300	387300	721870	67	4.28738	7.82363	Q6P0N0;G5E9K5;H7C1S6;C9J2Q8;H0YJM1	Q6P0N0	Mis18-binding protein 1	MIS18BP1
31.2533	30.5874	31.22	22.6683	23.6811	23.2604	115770000	82081000	129050000	94714	60218	0	21	4.55114	7.81696	Q96BT3;H3BTR4;B3KPB2;A8K662;H3BUW2;B4DWP4;H3BQJ0;I3L4F8;H3BMP6;H3BQS6;H3BN05;H3BTS2;B4DV17;B4DMP9;H3BQ71	Q96BT3;H3BTR4;B3KPB2;A8K662	Centromere protein T	CENPT
30.7446	30.6127	30.6391	23.1567	22.7536	23.0011	14196000	11770000	18510000	218730	96005	203330	17	6.39241	7.69496	Q8NG31;H0YCZ2;H0YEY7;H0YN41	Q8NG31;H0YCZ2	Protein CASC5	CASC5
29.6446	28.8378	29.8323	23.0849	22.8521	21.7805	43111000	21810000	58435000	225350	0	0	20	3.77305	6.86574	Q71F23;A8K8D2;Q09GN1;A5D8X7;D6R9S4	Q71F23;A8K8D2;Q09GN1;A5D8X7	Centromere protein U	MLF1IP
28.4179	27.501	28.2823	21.3005	22.9832	22.205	11932000	5413000	14767000	169370	0	0	18	3.32751	5.90416	Q8NF99;M0R288;K7ERU5;Q96K65;K7EIM5;E9PQL7;O15535;A0A024RCK9;Q5U5N5;P52741;B7Z1N1;Q6PJ68;Q6PJU4;A0A0A0MT18;Q8TAW3;O75123;A0A0J9YW98;M0R230;Q8TAU3;B4DRM0;P17025;P17014	Q8NF99	Zinc finger protein 397	ZNF397
30.3948	29.8615	29.1757	24.6143	22.7694	24.5178	77413000	62832000	71835000	1362300	355150	1655000	10	2.95891	5.84344	Q9NYP9	Q9NYP9	Protein Mis18-alpha	MIS18A
29.3495	28.3813	29.1182	22.4359	23.0257	24.0129	43163000	20931000	48562000	0	181260	748250	11	3.35321	5.79153	Q9BU64;Q53SX2	Q9BU64	Centromere protein O	CENPO
28.5238	27.7339	28.5353	22.5547	23.1508	22.1628	8475200	4039200	10630000	43584	36638	57397	17	3.87265	5.64154	A0A0F6QNT9;Q9NS56	A0A0F6QNT9;Q9NS56	E3 ubiquitin-protein ligase Topors	TOPORS
28.0893	27.567	27.8263	21.3934	22.8757	22.4837	5433900	3045300	6355500	45386	0	0	18	3.54501	5.57663	Q9BQI6;B4DR33;I6L9F1;H0YBU1;D6RED9	Q9BQI6;B4DR33	Ankyrin repeat domain-containing protein 32	ANKRD32
28.2907	27.4066	28.0204	21.7836	23.195	22.2971	26453000	12696000	19969000	0	168470	0	9	3.44486	5.48068	Q96IY1;Q53FM2;B2R9C5;B4E071;Q5SY74;Q5SY76	Q96IY1;Q53FM2;B2R9C5;B4E071	Kinetochore-associated protein NSL1 homolog	NSL1;C1orf48
29.9911	27.5275	28.1528	24.5246	23.4758	21.3875	5671600	1701900	5091700	33147	26941	0	60	1.99623	5.42781	Q9NR48;F8VWK7;H0YI82	Q9NR48	Histone-lysine N-methyltransferase ASH1L	ASH1L
29.2119	27.9095	28.9989	22.7479	23.5463	23.8117	19444000	11183000	21831000	292890	113630	545080	20	3.31174	5.33814	A0A024R2I7;Q9NS91;Q53H10;F8WE49;H7C3I2;H7C0A5;C9J0Q4;F8WFA6	A0A024R2I7;Q9NS91;Q53H10;F8WE49	E3 ubiquitin-protein ligase RAD18	RAD18
28.3074	27.7154	27.9637	22.2965	23.0212	22.7284	37256000	21618000	38662000	259690	0	97085	9	4.3952	5.31351	Q13352;D3DQ59	Q13352;D3DQ59	Centromere protein R	ITGB3BP
29.4706	27.4594	29.2332	23.3085	23.9838	23.2377	36158000	13536000	27285000	198840	198480	191780	18	2.81306	5.21106	Q9H410;A8K3X3;Q4G1A1;Q5JW54;Q5JW53;Q5JW57	Q9H410;A8K3X3;Q4G1A1;Q5JW54;Q5JW53	Kinetochore-associated protein DSN1 homolog	DSN1
27.5637	27.045	27.0534	22.1645	22.5008	22.0313	11267000	7205500	10214000	0	0	135250	12	4.6403	4.9885	Q8N0S6;A0A024R932	Q8N0S6;A0A024R932	Centromere protein L	CENPL
28.3188	27.2533	27.8763	22.994	22.747	22.9498	22065000	8638500	23360000	0	0	0	11	3.99031	4.91921	Q9H3R5;A0A0S2Z5T0;B3KVZ3;H0Y9E6;D6RBJ6	Q9H3R5;A0A0S2Z5T0;B3KVZ3;H0Y9E6	Centromere protein H	CENPH
29.8737	28.7361	30.9742	22.6425	22.3411	29.8838	38720000	51139000	170090000	68101000	28726000	52506000	3	0.897585	4.90552	B7Z6P1;P68133;P68032;A8K3K1;P63267;P62736;D2JYH4;Q7Z7J6;A6NL76;B3KUD3;B3KW67;Q13707;B4DUI8;F8WB63;B8ZZJ2;C9JFL5;F6UVQ4;F6QUT6;B7Z6I1;B3KPP5;F8WCH0;K4EQ44;K4EP00;K4ENJ5;A0A173GMX0;Q562X1;Q562W2;Q562U0;Q562T8;Q562R0;Q562Q6;Q562P8	B7Z6P1;P68133;P68032;A8K3K1;P63267;P62736;D2JYH4;Q7Z7J6;A6NL76;B3KUD3;B3KW67;Q13707;B4DUI8	Actin. alpha skeletal muscle;Actin. alpha cardiac muscle 1;Actin. gamma-enteric smooth muscle;Actin. aortic smooth muscle	ACTA1;ACTC1;ACTG2;ACTA2
30.8166	30.163	30.3325	25.8089	25.1895	25.6245	54701000	31465000	46126000	1307500	497720	900720	27	4.27446	4.8964	P53350;B2R841;B4E083;Q59GD0;Q58A51;D3DWF3;I3L387;I3L2H5	P53350;B2R841;B4E083;Q59GD0;Q58A51	Serine/threonine-protein kinase PLK1	PLK1;Plk-1 delta
31.3968	30.2456	30.7871	25.6979	26.3677	25.8266	142420000	65401000	119290000	1563300	1737600	1688300	21	3.6144	4.84577	P07199;Q71VN4;Q71VN3	P07199	Major centromere autoantigen B	CENPB
27.8184	27.1512	27.3348	22.4817	23.2624	22.5786	6041900	3442900	5783300	0	0	0	18	3.90936	4.66059	Q8NCD3;C9JWC4;H7C3V8;F8WCV1	Q8NCD3;C9JWC4	Holliday junction recognition protein	HJURP
28.8531	26.841	27.5595	23.8617	22.3644	23.2978	8103000	2907600	9464400	112540	27853	162470	19	2.47459	4.57654	Q6ZW49;B4DEQ6;B3KX43;F8WC23;H7BZI8	Q6ZW49;B4DEQ6	PAX-interacting protein 1	PAXIP1
30.4869	29.8124	29.9282	26.2311	24.7669	25.5541	38995000	22305000	40703000	1554600	491380	1155200	27	3.19334	4.55845	Q99661;A0A140VKF1;A8K3S3;B7Z6Q6;B7Z7M6;Q8N5N1;Q5JR91;Q5JR89;H0Y5Z9	Q99661;A0A140VKF1;A8K3S3;B7Z6Q6;B7Z7M6;Q8N5N1;Q5JR91	Kinesin-like protein KIF2C	KIF2C
27.5385	26.4798	27.7591	22.9633	22.5234	22.9688	14264000	6695200	22898000	0	0	0	10	3.33809	4.44062	Q7L2Z9;A0A024RD28	Q7L2Z9;A0A024RD28	Centromere protein Q	CENPQ
26.7	26.0805	26.7005	21.9823	22.4105	21.9165	8272000	4514500	11780000	0	0	0	6	4.15406	4.39058	Q6P1K2;D3DVB3;U3KQ54;A0A087WT04;V9GYI0	Q6P1K2;D3DVB3;U3KQ54	Polyamine-modulated factor 1	PMF1;hCG_1999356
27.5051	27.0267	26.6885	22.3432	22.8091	23.0988	2924400	1404500	2997300	39083	60799	0	13	3.74235	4.32304	Q86XI2;B3KRQ2;Q9NXD3;H0Y6U5;B4DHE5;B4DXB7;F8WE06;Q75L29	Q86XI2;B3KRQ2;Q9NXD3;H0Y6U5	Condensin-2 complex subunit G2	NCAPG2
30.6657	30.0919	30.5005	26.6125	25.4306	26.3077	20738000	74735000	15277000	589960	219470	599440	27	3.40223	4.30246	Q8NCN4;H0YEQ1	Q8NCN4	E3 ubiquitin-protein ligase RNF169	RNF169
27.4736	25.7549	27.4637	22.6137	22.4928	22.7088	4248200	2404100	5901400	112250	69729	0	15	2.7651	4.29232	Q8IWY8;A0A0C4DGM2;Q96AG1;Q8N9Y7;C9K0J8;H3BMU4;H3BUW4;A0A0A0MS73;Q05BJ4;B2ZWH0;B4DYI9;B4DLZ7;Q8N9M3;A0A087WXA8;Q2M218;P52742;H0Y892;Q6ZMW2;P17040	Q8IWY8;A0A0C4DGM2;Q96AG1;Q8N9Y7	Zinc finger and SCAN domain-containing protein 29	ZSCAN29
27.2935	26.919	27.7322	22.1505	23.2646	23.6975	21696000	7322300	17180000	0	0	0	7	2.93292	4.27736	Q9H081;A8K1M4	Q9H081;A8K1M4	Protein MIS12 homolog	MIS12
27.6124	26.5735	27.3762	22.7064	24.0908	22.1191	13453000	5011200	27893000	0	0	75944	7	2.50182	4.21523	D6RHD3;Q9BS16;D6RC76;D6RJF0;D6RAX0;D6R984;D6RBN6	D6RHD3;Q9BS16;D6RC76;D6RJF0;D6RAX0	Centromere protein K	CENPK
28.4656	27.1893	27.9982	23.7551	23.4082	24.1299	3013000	1731300	3499700	172300	84217	245380	32	3.18985	4.11998	Q96QE3;A0A075B754;H0UIC2	Q96QE3;A0A075B754;H0UIC2	ATPase family AAA domain-containing protein 5	ATAD5
26.8961	26.1911	26.8914	22.576	22.1653	23.4287	2282300	820510	3311400	469870	0	46889	16	3.06501	3.93624	Q8IX21;B1AL16;Q05BG6;Q96LW0	Q8IX21;B1AL16;Q05BG6	Protein FAM178A	FAM178A
27.1156	26.6295	26.8904	23.5324	23.094	22.4186	2086100	1040600	2962800	0	0	27596	13	3.40201	3.86352	P42695;G3V1A9;Q96FA6;E9PKK4;E9PQA3	P42695;G3V1A9	Condensin-2 complex subunit D3	NCAPD3
26.2096	25.9854	25.8586	22.2051	23.1519	21.9807	1022500	702820	1092600	0	0	0	11	3.17628	3.57199	Q8IY92	Q8IY92	Structure-specific endonuclease subunit SLX4	SLX4
25.7123	25.2719	25.487	21.9092	21.5105	22.4359	1224000	553170	1123300	18403	0	0	9	3.54834	3.53851	Q4KMR5;E9PH99;Q9Y4E5;D6RIA1;Q96JY2	Q4KMR5;E9PH99;Q9Y4E5	Zinc finger protein 451	ZNF451
25.6844	25.527	25.5099	23.2353	22.7622	20.9093	5346400	3809400	5678700	0	0	0	3	1.99715	3.27148	O43482;A0A024R9N0;H0YKL4	O43482;A0A024R9N0;H0YKL4	Protein Mis18-beta	OIP5
26.4628	25.2448	25.8519	21.9474	21.9927	24.0459	1149000	628190	1353400	0	0	85104	14	1.83204	3.19118	Q562F6;B7Z7S9	Q562F6;B7Z7S9	Shugoshin-like 2	SGOL2
25.9896	25.2379	26.0136	22.747	22.5425	22.71	16526000	9216700	22037000	210550	0	0	2	3.52186	3.08055	H0UI56;Q5EE01;A0A0A0MRK5	H0UI56;Q5EE01;A0A0A0MRK5	Centromere protein W	C6orf173;CENPW
25.814	27.222	27.7989	23.9866	24.141	23.9553	94145000	43467000	106000000	6513200	6720500	6917300	3	2.10255	2.91735	P61956;A0A024R8S3;Q6EEV6;P55854;A8MUA9;A8MU27	P61956;A0A024R8S3	Small ubiquitin-related modifier 2	SUMO2
25.6452	25.3341	25.6398	22.6988	22.8993	22.4181	1265900	785070	1691800	0	0	0	10	4.10666	2.86762	A0JLU2;O43683;B4DYG2;A8K5A6;C9JRC7;C9JQA4	A0JLU2;O43683;B4DYG2;A8K5A6	Mitotic checkpoint serine/threonine-protein kinase BUB1	BUB1
26.4783	25.7295	26.0525	24.9578	22.3797	22.4375	780300	417460	1082000	91302	14291	29103	18	1.49303	2.82845	Q9NSI6;H7BZR9;Q5R2U7;H7C409;Q5R2U6;H0Y463;A5PLN2;Q5R2U8;H0Y5I9;Q5R2U5;H0Y4A7;Q5R2U4;H0Y4R9;Q5R2U9;H0Y500	Q9NSI6	Bromodomain and WD repeat-containing protein 1	BRWD1
26.8016	26.2478	26.64	23.8171	24.4253	23.1663	1914600	1134000	1991800	227470	220330	161210	15	2.64005	2.76021	Q96SB8;C9JMN1;A0A0A0MRY1	Q96SB8;C9JMN1	Structural maintenance of chromosomes protein 6	SMC6
25.9589	26.4156	25.8779	23.6392	23.4706	23.0912	8871000	9266400	10538000	0	0	0	5	3.48925	2.68381	Q8N2Z9;A0A087WT10	Q8N2Z9	Centromere protein S	APITD1
25.9113	28.0648	27.6958	25.0616	22.198	26.5913	7626000	29128000	36986000	5677200	1545100	8193500	2	0.834432	2.60697	Q5T8U5;Q5T8U7;O15260;B7Z605;B7Z1G8;B7Z8F3;B7Z7A8	Q5T8U5;Q5T8U7;O15260;B7Z605;B7Z1G8;B7Z8F3;B7Z7A8	Surfeit locus protein 4	SURF4
25.3348	25.3446	25.1103	23.5828	22.4332	22.15	1162900	1375500	205500	0	31935	64690	3	2.33357	2.54127	Q9UPP1;H0Y3N9;B0QZZ4;Q5JPR8;B0QZZ2;B0QZZ3;B0QZE1;A0A024R9Y4;H0Y589	Q9UPP1;H0Y3N9	Histone lysine demethylase PHF8	PHF8
24.8075	24.2444	24.612	22.7052	21.8629	21.5496	840850	491040	844170	58705	24377	0	5	2.55784	2.51538	Q5T3J3	Q5T3J3	Ligand-dependent nuclear receptor-interacting factor 1	LRIF1
26.7154	26.0591	27.2066	24.412	23.7664	24.554	3120100	2055500	4999300	596440	128940	312750	14	2.37703	2.41622	Q96KM6	Q96KM6	Zinc finger protein 512B	ZNF512B
24.7182	24.96	24.3512	23.2395	21.6699	22.0568	5119600	7585400	3845600	0	0	0	1	2.02125	2.35439	B1N7B9	B1N7B9
30.0692	29.6097	29.589	27.301	27.5143	27.4147	30618000	22378000	31402000	6398900	4382600	8061000	1	3.81245	2.34601	B0AZS5;D6R9M0;H0Y8H2	B0AZS5
29.5325	29.223	29.5849	26.9708	27.2829	27.3122	20958000	14685000	26712000	2104400	1335400	3424900	26	3.86597	2.25819	Q9NQS7;B3KPD3;E9PM67	Q9NQS7;B3KPD3	Inner centromere protein	INCENP
25.3704	24.558	25.2828	22.8227	22.9094	22.8108	2698200	1313800	2087400	0	0	0	7	2.99255	2.22276	A0A024QZN5;A0A024QZJ1;O95229;A6NH27;B4DP12	A0A024QZN5;A0A024QZJ1;O95229	ZW10 interactor	ZWINT
24.4938	24.6273	24.4908	20.9187	23.095	22.9985	669300	967600	930730	452420	465600	525040	5	1.43798	2.19994	Q8TBE0;A0A024R9K2	Q8TBE0;A0A024R9K2	Bromo adjacent homology domain-containing 1 protein	BAHD1
26.4163	25.8259	26.0679	24.2598	24.4086	23.7652	1415900	1171200	1793900	251110	246310	189050	11	2.78447	1.95884	Q8IY18;B4E265	Q8IY18;B4E265	Structural maintenance of chromosomes protein 5	SMC5
26.3434	25.2632	25.3847	23.5934	24.3444	23.2607	863760	421960	854540	37600	0	28781	12	1.836	1.93089	Q3LRH8;A0A024R1W0;Q5XLT4;P38398;G8I0D8;A0A024R1Y0;Q5YLB2;A0A024R1V8;A0A024R1Y1;Q7Z606;A0A0U1RRA9;A0A0G3FC22;G4V4Z7;G4V4Z8;A0A068BDT9;A0A0F6TMZ3;A0A068BEV6;H0Y850;E7EUM2;Q5U3B7;G3XAC3;A0A024R1V7;A0A024R1Z8;A0A024R1V0;Q3YB51;A0A0F6TMQ0;A0A0F6RAD1;A0A0K0PUK0;K7EPC7;C6YB47;Q3B891;H0Y8B8;B7ZA85;E9PH68;E7EWN5;Q05BZ9;B4DES0;G1UI37;Q92897;A0A0N9E014;A0A068BCB6;Q3YB52;A0A068BI42;Q3YB49;E9PC22;A0A068BCA4;A…	Q3LRH8;A0A024R1W0;Q5XLT4;P38398;G8I0D8;A0A024R1Y0;Q5YLB2;A0A024R1V8;A0A024R1Y1;Q7Z606;A0A0U1RRA9	Breast cancer type 1 susceptibility protein	BRCA1
26.7193	25.2509	26.9833	22.986	25.0622	25.2196	14226000	8219800	20056000	4199000	3694600	5134000	2	0.988305	1.89526	Q9BW60;Q502X7	Q9BW60;Q502X7	Elongation of very long chain fatty acids protein 1	ELOVL1
25.8137	25.6888	25.9775	24.8073	21.8968	25.145	1755700	1403800	2523000	409080	110260	609050	7	0.84224	1.87696	B2RMQ4;Q8WWK9;C9J7Y4	B2RMQ4;Q8WWK9	Cytoskeleton-associated protein 2	CKAP2
25.3956	24.8599	25.0064	22.7803	23.6831	23.4322	708360	415310	532850	85499	99841	142400	11	2.33387	1.78874	Q5TGY3	Q5TGY3	AT-hook DNA-binding motif-containing protein 1	AHDC1
24.7273	24.4328	24.3283	22.0326	22.8123	23.3426	1218000	707830	1134000	26705	0	0	3	1.94263	1.76693	E9PQC4;Q9BZD4;A0A024R8Y0;B1AQT4;E9PP32	E9PQC4;Q9BZD4;A0A024R8Y0	Kinetochore protein Nuf2	NUF2
24.5419	24.1602	24.5226	22.3166	22.8581	22.8384	515240	365310	1387400	0	0	0	6	2.88329	1.7372	Q05DQ6;O14777;A8K031	Q05DQ6;O14777;A8K031	Kinetochore protein NDC80 homolog	NDC80;KNTC2
27.0536	27.0581	27.5643	25.1574	25.4236	25.9086	1225400	1015300	2437400	237070	154610	545130	18	2.47026	1.7288	P46100;A4LAA3;A0A096LNW1;A0A096LNL9;A0A096LNN3;B4DHH8;B4DLE1;B4DLW1;A0A087WWG0;A0A096LNL6;B7Z1D8;A0A067XLH7;A0A096LNR8;Q86U63;A0A096LNL7;Q5H9A3;A0A096LNX6;H0Y3T0	P46100;A4LAA3;A0A096LNW1;A0A096LNL9	Transcriptional regulator ATRX	ATRX
24.7012	24.7356	24.6013	24.1409	22.6812	22.2338	894180	472540	1357900	346430	44473	65682	4	1.34539	1.66074	B4E014;Q9UBD5;B7Z8A5;B7ZAI3;Q6IBJ0;B4DZ51	B4E014;Q9UBD5;B7Z8A5;B7ZAI3;Q6IBJ0	Origin recognition complex subunit 3	ORC3;ORC3L
24.2864	23.7051	24.2681	22.1537	22.1319	22.9988	729240	351160	1503200	205790	54482	449110	3	2.07287	1.65842	Q9BR77;F5H0W5	Q9BR77	Coiled-coil domain-containing protein 77	CCDC77
25.5067	25.4983	25.9337	20.8368	25.875	25.2816	1349100	639250	2763700	110240	824640	2339300	6	0.443589	1.64846	O00257;A0A0S2Z5B2;A0A0S2Z4Q9	O00257;A0A0S2Z5B2	E3 SUMO-protein ligase CBX4	CBX4
26.8633	27.0664	27.2952	27.3862	26.544	22.3796	8040300	8541600	13558000	9651200	3673700	3472000	2	0.454853	1.63836	B4DDB6;B4E3E6;Q65ZQ3;Q8NFG3;H7C1J8;Q66K53	B4DDB6;B4E3E6		HNRPA3
26.6625	26.0504	26.4528	24.3987	24.79	25.0751	1490300	766960	1890500	336450	182280	404270	12	2.44912	1.63395	Q9BZ95;E9PKA2	Q9BZ95	Histone-lysine N-methyltransferase NSD3	WHSC1L1
27.9605	27.379	27.92	26.2015	25.966	26.2048	1648200	1194100	2367600	613600	424290	764860	7	2.87966	1.62905	B2RWP5;Q96L73;Q96DQ7;Q8NB95;Q96MN8;A4QPE5;A0A1W2PS55	B2RWP5;Q96L73	Histone-lysine N-methyltransferase. H3 lysine-36 and H4 lysine-20 specific	NSD1
24.9103	24.8615	25.7615	22.0567	23.3513	25.2469	8662000	6874000	16680000	1406100	2574800	10447000	2	0.771025	1.62612	Q6LD62;E5RIR4;E9PD24;E7EVZ2;E7ESK7;P63104;D0PNI1;E7EX29;E5RGE1;Q4VY20;Q3YBA8;A0A0J9YWZ2;B4DJF2;Q4VY19;I3L3T1;K7EIT4;A0A0J9YWE8;A2IDB2;Q59EQ2;B4DE78;B4DHC4;V9HWD6;Q04917;P31946;B5BU24;B2R6N6;A0A024R1K7;P61981;B3KNB4;P31947;V9HW98;P62258;G9K389;G9K388	Q6LD62;E5RIR4;E9PD24;E7EVZ2;E7ESK7;P63104;D0PNI1;E7EX29;E5RGE1	14-3-3 protein zeta/delta	14-3-3 protein;YWHAZ
24.486	24.3123	24.4839	24.5442	21.73	22.1533	829760	568340	833740	367340	198070	517140	4	0.856702	1.61822	Q9NS39;Q86X17;Q5VW43;A4VCH5;A8K1I0	Q9NS39	Double-stranded RNA-specific editase B2	ADARB2
24.4913	24.4126	24.7664	23.3648	21.0406	24.4456	1552200	1387900	1087600	1020300	569170	1469000	4	0.728144	1.60645	Q6NUM7;Q9NUQ2;A0A024R640;H0YC22	Q6NUM7;Q9NUQ2;A0A024R640	1-acyl-sn-glycerol-3-phosphate acyltransferase epsilon	AGPAT5
27.7565	27.2595	27.4691	25.6774	25.9666	26.0786	3336500	2136700	4179600	655940	317050	675020	25	2.97493	1.58748	E9PD53;B3KXX5;Q9NTJ3;B3KVJ5;Q6P169;C9JR83;Q6NSG3;Q58F29;C9J9E4;C9JVD8;C9J578;C9JWF0;C9IYK2;C9JJ64	E9PD53;B3KXX5;Q9NTJ3;B3KVJ5	Structural maintenance of chromosomes protein;Structural maintenance of chromosomes protein 4	SMC4
26.6688	26.2422	26.9707	24.9527	24.9278	25.3434	1925700	1179600	2887800	334970	183560	368140	19	2.46262	1.55266	O95347;B7ZLZ7;A0A024R158;B3KMB1;A8K984;Q2KQ72;Q05BV1;B3KM27;Q6IPS5;Q7Z2X1;A0JLM9;Q5T821;Q05D74;Q32Q15;Q6P712;A0A0C4DGE5	O95347;B7ZLZ7;A0A024R158;B3KMB1;A8K984;Q2KQ72;Q05BV1;B3KM27	Structural maintenance of chromosomes protein 2;Structural maintenance of chromosomes protein	SMC2
24.4438	24.0736	24.0762	23.9237	22.2632	21.8066	3016300	2106300	2782800	1645600	1222000	305280	2	1.10094	1.53335	G1UI19;O60684;S4R3E5;Q5TFJ7;B4DII5;B4DWX3	G1UI19;O60684;S4R3E5;Q5TFJ7;B4DII5;B4DWX3	Importin subunit alpha-7;Importin subunit alpha	KPNA6
25.8273	25.8464	25.8463	23.9267	24.7152	24.3195	536100	332190	530980	94821	78624	76910	13	2.58157	1.51955	B9EGR5;Q8IWI9;H3BP52;H3BTF4;Q9H6M4;B4DVS1;H3BU53;H3BTN2	B9EGR5;Q8IWI9;H3BP52;H3BTF4	MAX gene-associated protein	MGA
24.5358	24.1335	24.0898	22.9278	22.7338	22.6227	468260	217530	473700	73462	62891	92068	4	3.05493	1.49165	O95239;Q59HG1;B3KNC0;Q6PKB2	O95239;Q59HG1;B3KNC0;Q6PKB2	Chromosome-associated kinesin KIF4A	KIF4A
24.3036	24.104	23.8436	22.6578	22.8103	22.3173	429020	321680	386320	0	0	0	3	2.78059	1.48856	A0A1W1GST9;B4DXD8;Q92889;A0A1W1GSK9;A0PJA9;A0A1W1GSL6	A0A1W1GST9;B4DXD8;Q92889;A0A1W1GSK9	DNA repair endonuclease XPF	ERCC4
24.7777	24.3155	25.1878	22.1231	22.973	24.7396	1631900	1241600	2963100	1216400	0	1516700	3	0.848882	1.48176	A6NEM5;Q92643;B1AK81	A6NEM5;Q92643	GPI-anchor transamidase	PIGK
27.2717	26.7255	27.0219	25.5316	25.5063	25.567	5031400	2831100	4633600	859290	461450	1065400	15	3.1218	1.47138	Q8ND82;Q9UJJ2;Q86YH2;B3KUN2;A0A0D9SEJ8	Q8ND82;Q9UJJ2	Zinc finger protein 280C	ZNF280C
25.1368	24.8952	25.4292	22.3937	24.3592	24.4699	1092600	440300	1728700	239430	266960	424600	5	0.955963	1.41279	A0A0C4DGP2;A0A0C4DGP5;Q86Y91;Q6NWY8	A0A0C4DGP2;A0A0C4DGP5;Q86Y91	Kinesin-like protein KIF18B	KIF18B
24.791	24.6131	24.5946	24.6747	23.329	21.7857	1492200	1596400	1506800	1403900	103220	1017300	4	0.772191	1.40311	C9JJ47;A0A087WY71;Q96CW1;E9PFW3;B4DNB9;C9JTK4;C9JGT8;C9JJD3;C9JPV8;B7Z4N2;B4DJB1;B4DFM1;B4E304;B4DTI4	C9JJ47;A0A087WY71;Q96CW1;E9PFW3;B4DNB9;C9JTK4;C9JGT8;C9JJD3;C9JPV8;B7Z4N2;B4DJB1;B4DFM1;B4E304	AP-2 complex subunit mu	AP2M1
24.5991	23.8814	23.6009	21.7215	23.5167	22.7121	583680	170090	372960	644360	0	55291	3	1.08216	1.37705	B4DIX0;Q13045;Q59H95	B4DIX0;Q13045;Q59H95	Protein flightless-1 homolog	FLII
27.9157	27.398	27.4488	26.3368	26.1932	26.1249	16997000	11178000	16839000	4976900	2328800	4305900	12	2.83022	1.3692	Q53HL2;A8K7A2;B4DXT3	Q53HL2;A8K7A2	Borealin	CDCA8
25.6227	25.6968	25.975	25.3148	22.5879	25.3014	7117100	7002700	9506100	4885900	723010	4348600	2	0.678483	1.36345	D3DQ38;Q9NWV4	D3DQ38;Q9NWV4	UPF0587 protein C1orf123	C1orf123
26.4566	26.0865	25.9699	24.758	24.9371	24.7622	2759100	1873100	2256000	718730	419410	678480	8	2.98796	1.35194	A0A087WSW7;F6XU50;Q6I7N8;Q9NRZ9;A0A0B4J1V9;Q9NW36;B1ALG6	A0A087WSW7;F6XU50;Q6I7N8;Q9NRZ9;A0A0B4J1V9	Lymphoid-specific helicase	HELLS
24.6306	23.9733	24.369	22.2324	23.4402	23.2647	559560	550060	901330	45055	138480	128720	4	1.47621	1.34517	Q8IYA6;A0A024R512	Q8IYA6	Cytoskeleton-associated protein 2-like	CKAP2L
25.9681	26.0211	26.0881	22.8339	25.4553	25.8949	6008400	6944400	6615000	4804000	2119600	5271000	2	0.608629	1.2977	B2R603;P07910;A8K9A4;G3V2Q1;G3V576;G3V555;G3V5V7;G3V575;D3DPI2;O60812;B2RXH8;A0A0G2JNQ3;P0DMR1;B7ZW38;A0A0G2JPF8;B4DMJ1;B4DSU6;Q6PKD2;G3V4M8;G3V2H6;Q569J8	B2R603;P07910;A8K9A4;G3V2Q1;G3V576;G3V555;G3V5V7;G3V575;D3DPI2	Heterogeneous nuclear ribonucleoproteins C1/C2	HNRNPC;hCG_1641229
26.8424	26.5057	26.5652	25.1924	25.6226	25.2178	1396400	889570	1333100	202620	135380	192710	21	2.75988	1.29351	A6NHR9;J3KTL8	A6NHR9	Structural maintenance of chromosomes flexible hinge domain-containing protein 1	SMCHD1
23.7077	23.7066	23.9099	23.1711	22.1672	22.1225	164840	197760	275930	90811	14066	82832	4	1.67764	1.28784	A0A1B0GUH9;A0PJI9;A0A1P0AZG4	A0A1B0GUH9;A0PJI9;A0A1P0AZG4		C10orf12
25.8322	26.1561	26.1599	25.764	22.5239	26.0052	5166800	6213000	9746300	5401900	2303200	4852700	3	0.497477	1.28503	G3XAN4;Q6FHU7;Q6FHL3;Q15629;A8K032	G3XAN4;Q6FHU7;Q6FHL3;Q15629;A8K032	Translocating chain-associated membrane protein 1	TRAM1
23.9752	23.9722	24.1606	22.1198	22.314	23.8281	2751700	3309000	5145500	557170	414360	2936300	3	1.10907	1.28201	F5H6U2;F5GZ82;Q9NP50;B7Z287;H0YGG0	F5H6U2;F5GZ82;Q9NP50;B7Z287	Protein FAM60A	FAM60A
25.5595	25.4306	25.8478	25.0375	23.0517	24.9112	2126300	1342000	3256400	955370	141840	734330	8	0.913708	1.27919	O95251;E7EUP3;B7Z4D9;B3KVJ2;B4DG18;B4DJ40;B4DGH8	O95251;E7EUP3;B7Z4D9;B3KVJ2;B4DG18	Histone acetyltransferase KAT7	KAT7
26.5339	26.6748	26.8636	25.8299	23.1925	27.2411	1757000	2251500	2748200	1436200	1176600	1951300	4	0.460625	1.26962	O43707;A0A0S2Z3G9;Q96BG6;B4E337;F5GXS2;A0A0S2Z3C0;H7C144;A0A0S2Z3X3	O43707;A0A0S2Z3G9;Q96BG6;B4E337;F5GXS2	Alpha-actinin-4	ACTN4
24.4737	24.2455	24.2898	22.4048	23.492	23.3163	578460	449300	632890	49865	11121	35466	4	1.67231	1.2653	Q99728;Q53F80;B2RAM8;A0AVN2;B4DX74;F6MDI4;F6MDI3;A0A087X0C6;F6MDI2;A0A087WZ19;F6MDI1;F6MDI0;A0A087X2H0	Q99728;Q53F80;B2RAM8;A0AVN2;B4DX74;F6MDI4	BRCA1-associated RING domain protein 1	BARD1
23.094	23.1043	23.7026	22.9928	20.9595	22.1642	859720	750170	1560400	0	0	200020	2	0.946363	1.26146	E5RFJ1;Q96MF7;A0A024R9J6;E5RIM1;A0A087WTZ8;E5RHW9	E5RFJ1;Q96MF7;A0A024R9J6;E5RIM1;A0A087WTZ8;E5RHW9	E3 SUMO-protein ligase NSE2	NSMCE2
29.3632	29.0006	29.4197	27.9136	28.2283	27.8983	5830200	4218900	7185300	1665700	1104700	1751200	45	2.73922	1.24775	Q6KC79;Q6IEH8;A8K2T2;A6QL62	Q6KC79;Q6IEH8	Nipped-B-like protein	NIPBL
24.3128	24.5961	24.0314	23.7328	21.7312	23.7438	488590	570420	981230	176980	255920	354520	5	0.838349	1.24413	Q9UQR1;Q8TDH4;B2RAI2;Q8IWK7;Q4FD37;Q15552;C9JRX0;C9K0U4;C9J6Y6;G5E9X2	Q9UQR1;Q8TDH4;B2RAI2;Q8IWK7;Q4FD37;Q15552	Zinc finger protein 148	ZNF148;tb protein
23.741	23.5342	23.3699	21.6164	22.7532	22.5826	223020	166310	238770	44565	30852	38150	3	1.53523	1.23097	Q14865	Q14865	AT-rich interactive domain-containing protein 5B	ARID5B
26.7299	26.5026	26.4075	25.473	25.3913	25.2024	4412800	3052100	3407900	522190	637970	680900	12	3.17225	1.19109	Q4VC44;B3KRZ0;I3L188;J3KNW1;B3KPY2;B3KP60;I3L4V9;I3L0R3;I3L231;I3L287	Q4VC44;B3KRZ0;I3L188;J3KNW1	FLYWCH-type zinc finger-containing protein 1	FLYWCH1
23.6768	23.8224	24.1277	22.6935	22.6665	22.7821	797430	979830	1615800	179780	0	957090	2	2.96993	1.16158	B0AZV0;Q9Y3F4;H0YH33	B0AZV0;Q9Y3F4;H0YH33	Serine-threonine kinase receptor-associated protein	STRAP
33.2781	32.9362	33.507	32.0226	32.1288	32.1166	60110000	42950000	99717000	19252000	12589000	22831000	187	2.61277	1.15109	P46013;B4DRH3;Q70L74;Q70L72	P46013	Antigen KI-67	MKI67
24.3376	24.4256	23.6018	23.8449	22.4508	22.661	656120	609830	450060	455780	189560	192330	6	1.05404	1.13613	B3KUD7;B4DDF5;P33993;C6EMX8;B2RBA6;A0A0S2Z4A5;Q9H4N9;C9J8M6	B3KUD7;B4DDF5;P33993;C6EMX8;B2RBA6;A0A0S2Z4A5;Q9H4N9	DNA replication licensing factor MCM7	MCM7
30.4019	30.0721	30.4777	29.0925	29.2353	29.2398	36529000	28081000	46288000	13690000	6471300	13122000	40	2.96795	1.12803	Q9ULW0;Q643R0;B3KM90;Q96FC3	Q9ULW0;Q643R0;B3KM90	Targeting protein for Xklp2	TPX2;HCTP4
26.0584	25.9902	26.0901	24.8104	25.0439	24.9126	768240	577940	875690	280890	190130	339750	11	3.96638	1.12394	Q14669;B4DYJ6;G5E9G6;C9JLJ5;C9JSX9;C9JLD7;F8W9P3;H7C2Y1;H7C1L9	Q14669	E3 ubiquitin-protein ligase TRIP12	TRIP12
25.176	25.3138	24.9865	24.9422	21.8429	25.3472	2736500	2793400	3608900	2238700	536880	2335700	3	0.42896	1.11468	Q05DL3;P48729;V9HW00;B4E1D9;D6REM4;Q6PJ06;E5RG27;D6RGE5;U3KPX3;H0Y9X2;U3KQK7;B4DFH4;E7ETM0;B4DER9;Q8N752	Q05DL3;P48729;V9HW00;B4E1D9;D6REM4;Q6PJ06	Casein kinase I isoform alpha	CSNK1A1
26.989	26.3092	26.6326	25.4667	25.5716	25.5988	2439900	1249100	2379800	436560	239640	495120	15	2.26726	1.09791	H0YNU5;P54132;B2RAN0;Q3B7X0;B7ZKN7;H0YLV8;B7Z2X2;B7Z8C1	H0YNU5;P54132;B2RAN0;Q3B7X0;B7ZKN7	Bloom syndrome protein	BLM
24.0712	23.7148	24.09	23.0504	22.0589	23.5072	575960	448030	950590	0	38831	381010	5	1.1493	1.08648	B3KM53;Q9UBC3;Q59H79;Q8WVA9;Q6PJ37;A0A0C4DG02;Q9Y6K1	B3KM53;Q9UBC3;Q59H79	DNA (cytosine-5)-methyltransferase 3B	DNMT3B
29.0218	28.8057	28.998	27.9422	28.0394	27.6099	10219000	6731600	10287000	2720900	1551600	1669200	39	2.73609	1.07801	Q6PL18;A0A024R9G7;A0A0B4J211	Q6PL18;A0A024R9G7;A0A0B4J211	ATPase family AAA domain-containing protein 2	ATAD2
24.4836	24.6147	24.235	23.7678	22.0935	24.2468	2395300	2619300	2920800	1468500	955030	2286100	2	0.745232	1.07506	Q2I381;B4DRA6;B4DR28;Q9UJG1	Q2I381;B4DRA6;B4DR28;Q9UJG1	Motile sperm domain-containing protein 1	MOSPD1
28.1398	27.8243	28.1715	27.0832	26.7019	27.161	8349100	5627800	13661000	2595500	1027100	3781200	1	2.38563	1.06316	Q16666	Q16666	Gamma-interferon-inducible protein 16	IFI16
23.5069	22.7187	22.7682	21.8095	21.4186	22.6197	232910	93824	167290	58493	27518	122540	4	1.13117	1.04865	Q92974;D3DVA5;V9GYM8;B4DJ49;B7Z977;V9GYF5;V9GYG5;V9GZ14;V9GZ58;Q5VY93	Q92974;D3DVA5;V9GYM8;B4DJ49;B7Z977;V9GYF5;V9GYG5;V9GZ14	Rho guanine nucleotide exchange factor 2	ARHGEF2
25.268	25.1713	25.6115	24.2106	24.5826	24.1139	1036500	1758800	3934700	521810	441780	584050	7	2.23253	1.04787	Q9UIS9;A8K654;B4DI41;B4DUR3;A0A0A0MS90;K7EPZ6;K7EN65;Q59EP6;K7EMA9	Q9UIS9;A8K654;B4DI41;B4DUR3;A0A0A0MS90;K7EPZ6	Methyl-CpG-binding domain protein 1	MBD1
24.5489	24.3795	24.0513	23.9473	22.2739	23.7375	1276500	1062600	1368900	906930	167010	447370	2	0.856955	1.00702	Q05D32;A0A024R5Q8;H0YNU2;H0YNW9;H0YMH7	Q05D32;A0A024R5Q8;H0YNU2;H0YNW9;H0YMH7	CTD small phosphatase-like protein 2	CTDSPL2
26.0296	25.9885	25.9126	26.0458	22.7399	26.1414	5832000	4674700	5873600	5624500	409410	6657800	3	0.375309	1.00126	Q9Y3L5;A0A087X2C3;F6U784;Q5JQ44;P61225;P10114	Q9Y3L5;A0A087X2C3	Ras-related protein Rap-2c	RAP2C
23.8042	23.2976	23.2662	22.3893	22.4861	22.4968	362800	94004	137030	88376	61490	97213	4	2.3076	0.998598	A0A067XG54;Q8NB49;H7C0E8	A0A067XG54;Q8NB49	Probable phospholipid-transporting ATPase IG	ATP11C
32.5612	31.9281	31.8484	31.6416	30.8572	30.8431	341060000	225850000	1012100000	139560000	35563000	95622000	16	1.34537	0.998574	Qnocod	Qnocod
24.6349	24.5493	24.3276	23.4753	23.6374	23.4126	764100	352180	773600	174960	120400	215530	5	3.03143	0.995488	V9HW80;P55072;Q96IF9;Q9HAP1;Q0IIN5;C9JUP7;C9IZA5;Q9HAP0;Q9NTC4	V9HW80;P55072;Q96IF9	Transitional endoplasmic reticulum ATPase	VCP
31.2719	30.8327	30.8851	30.0379	30.0755	29.9067	36373000	22698000	32726000	9837300	7903700	9572900	49	2.58922	0.989868	P11388;J3KTB7	P11388	DNA topoisomerase 2-alpha	TOP2A
25.1981	25.5727	24.5391	24	23.2903	25.0674	2775500	3256000	2130000	1510800	845550	2545300	3	0.756023	0.984058	Q8TBP6	Q8TBP6	Solute carrier family 25 member 40	SLC25A40
27.4657	26.9886	27.1076	26.3226	26.3376	26.008	4051500	2771900	3802600	1734600	974480	1372300	17	2.24003	0.964552	Q96F82;Q13415;B7Z8H0;A8K794	Q96F82;Q13415;B7Z8H0;A8K794	Origin recognition complex subunit 1	ORC1L;ORC1
28.5468	28.243	28.2289	27.4818	27.3526	27.2952	20231000	14267000	20193000	6559400	3760300	7700400	2	2.91875	0.963037	B2RC06;J3KT86;B4DXA6;A0A0A0MSY3;V9HW16;Q5Y191;Q9UQB9	B2RC06;J3KT86		AURKB
27.2902	27.0867	27.193	25.8373	26.334	26.5545	24340000	18316000	30476000	8396900	5199600	13067000	4	1.90074	0.948039	P63165;A0A024R3Z2;B8ZZN6;B8ZZJ0;B9A032;B8ZZ67;G2XKQ0	P63165;A0A024R3Z2;B8ZZN6;B8ZZJ0;B9A032;B8ZZ67;G2XKQ0	Small ubiquitin-related modifier 1	SUMO1
27.3739	27.1718	27.5108	26.1421	26.6256	26.4668	1412300	706170	1544000	329500	308150	572860	22	2.2551	0.940698	Q03164;E9PR05;B4DIJ7;Q8N6B4;Q1HA41;Q86YN9;Q86YN8;B3W6H7;H7BYJ6;Q9UPD0;Q9Y6P1;B4E012;Q8N6B3;B3W6H5;B3W6H3;Q86YP1;Q108H6;Q1WD23;Q9HB83;A2JNH0;A5H1S5;Q86YP0;Q9HB82;Q9HB88;Q9HB87;Q9HBJ4;G1FDV2;A2JNH1;Q86YP2;Q9HB81;Q8NI09;Q8NFI1;H7C5W4;A2JNH3;Q9HB80;A2JNH2;Q8NFI2;Q8NFI0;Q8NFH9;Q8TD98;Q9UMN6	Q03164	Histone-lysine N-methyltransferase 2A;MLL cleavage product N320;MLL cleavage product C180	KMT2A
28.5809	28.1171	28.4763	27.4194	27.6482	27.2847	8568700	5965200	11195000	3081100	1883100	2274000	27	2.22861	0.940646	O95235;D6R9E4;D6RBN1	O95235	Kinesin-like protein KIF20A	KIF20A
24.281	24.357	24.0261	23.992	23.338	22.5572	936700	909150	1098900	470530	199580	253880	3	1.0184	0.925641	B3KPJ4;B4DG61;B7ZLY0;A0A0A0MSI2;Q8IXK0;P78365	B3KPJ4;B4DG61;B7ZLY0;A0A0A0MSI2;Q8IXK0;P78365	Polyhomeotic-like protein 2	PHC2;HPH2
23.5815	23.4262	23.4419	22.3784	21.7077	23.5899	1240800	929660	1779900	677240	693550	1135000	2	0.769935	0.924564	B3KSK3;O43293;B3KNJ3;M0QYY8	B3KSK3;O43293;B3KNJ3;M0QYY8	Death-associated protein kinase 3	DAPK3
25.186	25.0988	24.7364	25.2194	22.5117	24.5231	1529800	1178600	1498800	889460	330400	549450	7	0.48765	0.922342	Q05DU1;Q9NVN8;A0A024R9Y6	Q05DU1;Q9NVN8;A0A024R9Y6	Guanine nucleotide-binding protein-like 3-like protein	GNL3L
24.0755	24.4134	23.6898	23.3986	22.604	23.434	344180	590520	376870	159200	47586	229970	3	1.2537	0.914015	Q8NDT2	Q8NDT2	Putative RNA-binding protein 15B	RBM15B
23.2746	23.4267	23.1646	23.0815	23.2374	20.8269	206330	201310	240870	161170	97085	227050	2	0.507174	0.906714	Q59GQ7;A0A0C4DGA6;Q14527;A8K5B6;Q05DQ5;Q05DF7;Q05BZ6	Q59GQ7;A0A0C4DGA6;Q14527;A8K5B6;Q05DQ5;Q05DF7;Q05BZ6	Helicase-like transcription factor	HLTF
28.7352	28.2352	28.2227	27.5054	27.5618	27.4424	17060000	9293700	11152000	4490900	2073200	2853500	25	2.18371	0.894465	Q14807;A0A024R632;H3BRB3;B7Z9T5;H3BTH5;Q14985;O60846;Q14984;Q7LE35;I3L306;H3BQB9;B4DNF2	Q14807;A0A024R632;H3BRB3;B7Z9T5	Kinesin-like protein KIF22	KIF22
23.8649	23.6471	23.6079	22.4166	22.8285	23.2469	630150	423860	428630	114420	0	137770	4	1.59089	0.87599	C9J470;B4DRG7;E9PHA2;Q15003;A8K4T8;C9JZP1	C9J470;B4DRG7;E9PHA2;Q15003;A8K4T8	Condensin complex subunit 2	NCAPH
26.9005	26.7003	27.3547	25.9846	26.0274	26.3228	2340400	1709200	3772500	992200	458190	1240300	16	1.77605	0.873554	Q96JM3;S4R3K0	Q96JM3	Chromosome alignment-maintaining phosphoprotein 1	CHAMP1
26.2625	26.2042	26.5072	25.2375	25.4211	25.751	1577900	1201300	2738300	363220	256170	1021700	14	2.07585	0.85482	M0QXA7;B9EGQ5;O95785;B3KR89	M0QXA7;B9EGQ5;O95785;B3KR89	Protein Wiz	WIZ
25.8822	25.7732	25.9087	24.9242	25.1511	24.9357	952400	676220	1276800	501390	325640	451600	11	3.25964	0.851055	B3KWI2;Q8IZT6;Q4G1H0;A0A087WV76;Q4G1H2	B3KWI2;Q8IZT6	Abnormal spindle-like microcephaly-associated protein	ASPM
27.6544	27.1701	27.6194	26.417	26.8028	26.6729	3218200	1617700	4442400	989200	655580	1625400	23	1.93598	0.85039	O96028;Q05CW4;H0Y9L4;D6R9V2;D6RIS1;H0Y9U6	O96028;Q05CW4	Histone-lysine N-methyltransferase NSD2	WHSC1
23.4514	23.7618	23.5552	22.58	23.4524	22.2236	1437200	523940	686490	481410	461610	1168000	4	1.04567	0.83747	Q05DB2;Q9HCU5;A8K813;H7C2N7;B5MC98;H7C0W3	Q05DB2;Q9HCU5;A8K813;H7C2N7;B5MC98	Prolactin regulatory element-binding protein	PREB
24.095	23.6935	24.0221	23.4289	21.8353	24.0448	2685100	2051600	4089100	1245800	1802200	3333700	2	0.551131	0.833858	C9JQA1;O60828;A0A0S2Z4V5;A0A0S2Z556;Q4VY28	C9JQA1;O60828;A0A0S2Z4V5;A0A0S2Z556;Q4VY28	Polyglutamine-binding protein 1	PQBP1
25.1098	24.7755	24.8177	24.0253	24.0278	24.1637	1139900	768450	1213500	568730	307170	200030	5	2.71187	0.828753	Q2TAK8;J3KNX4;D6W5Y8;A0A0D9SGJ8;Q13108;K7EP97	Q2TAK8;J3KNX4;D6W5Y8;A0A0D9SGJ8	PWWP domain-containing protein MUM1	MUM1
27.3951	26.8912	26.9659	26.2122	26.0979	26.4661	12092000	3841000	6700000	7185500	1391500	3361000	11	1.90507	0.825303	O43463;B4DMP6;Q14828	O43463	Histone-lysine N-methyltransferase SUV39H1	SUV39H1
26.1551	25.1588	25.3253	25.0846	24.6392	24.461	2165600	1136900	1866100	864710	421830	617900	9	1.06932	0.818151	Q9UG63;A0A090N7X1;A0A090N7Y2;C9JHK9;C9JZV3	Q9UG63;A0A090N7X1;A0A090N7Y2;C9JHK9;C9JZV3	ATP-binding cassette sub-family F member 2	ABCF2
29.4355	29.3098	29.4918	28.4324	28.7849	28.5783	76548000	60433000	98330000	38444000	23874000	39055000	12	2.6692	0.813843	V9HWG0;P45973;Q6I9T7;F8VNY3	V9HWG0;P45973;Q6I9T7	Chromobox protein homolog 5	CBX5
26.7471	26.4464	26.0684	25.6035	25.7168	25.5167	8127900	5639500	4586900	1788700	1236600	1605700	9	1.77344	0.808266	B4DKE6;Q53HK8;P40938;A0A024RDQ8;Q5U0C2;A0A087X270	B4DKE6;Q53HK8;P40938;A0A024RDQ8;Q5U0C2	Replication factor C subunit 3	RFC3
24.0204	23.8033	24.2587	23.9052	22.9255	22.8271	511980	438430	907500	324290	0	0	3	1.03015	0.808218	Q9P209;A0A024QYZ9;A0A0G2JR44	Q9P209;A0A024QYZ9	Centrosomal protein of 72 kDa	CEP72
26.9141	26.555	26.55	25.6734	25.9126	26.0125	8106900	5174000	10196000	3254300	1512800	3540000	10	2.16768	0.806869	C9JZI1;P35249;C9J8M3;C9JTT7;C9JXZ7;C9JGY5;F8WE44;C9JW34;H7C1P0	C9JZI1;P35249;C9J8M3;C9JTT7;C9JXZ7	Replication factor C subunit 4	RFC4
23.7137	23.6085	23.0537	22.7547	22.4528	22.7508	200900	175990	164060	0	0	0	2	1.61838	0.805855	O15360;H3BQW7;H3BS03	O15360;H3BQW7;H3BS03	Fanconi anemia group A protein	FANCA
27.6574	27.3547	27.3491	26.5337	26.8247	26.606	2866300	2093800	2749400	1373300	700600	1313000	26	2.39791	0.798939	P26358;A0A024R7E3;I6L9H2;Q59FP7;B3KVA0;K7ENW7;K7EIZ6;K7EMU8;K7EJL0;K7ENQ6	P26358;A0A024R7E3;I6L9H2;Q59FP7	DNA (cytosine-5)-methyltransferase 1;Cytosine-specific methyltransferase	DNMT1
23.4251	23.0768	22.8614	22.0879	21.7491	23.1599	157800	125580	132380	0	0	27467	2	0.799681	0.788767	Q9Y4B6;B3KN11	Q9Y4B6;B3KN11	Protein VPRBP	VPRBP
30.2197	30.0469	30.2567	29.384	29.4731	29.3361	39061000	39327000	47415000	13778000	8043200	15464000	27	3.28453	0.776674	Q5QJE6;J3KP30;B7Z854;E9PRB3	Q5QJE6;J3KP30;B7Z854	Deoxynucleotidyltransferase terminal-interacting protein 2	DNTTIP2
25.7193	28.3019	25.6056	24.8451	26.3972	26.0609	26047000	168450000	20351000	12299000	21071000	32527000	3	0.317582	0.774549	P62861;E9PR30	P62861;E9PR30	40S ribosomal protein S30	FAU
25.6749	25.8345	25.9381	24.8415	25.1536	25.1403	971390	564380	692070	209100	153510	345590	10	2.42342	0.770689	W5ZR30;Q9UGU0;A9JX13	W5ZR30;Q9UGU0	Transcription factor 20	TCF20
23.7547	23.6816	23.9162	22.7247	23.4603	22.8755	338380	323660	550940	159010	106740	121630	2	1.50511	0.764012	O95672;H7C3M0;Q86SN0	O95672;H7C3M0;Q86SN0	Endothelin-converting enzyme-like 1	ECEL1
24.9548	24.3964	25.5883	24.0383	24.2049	24.4224	682940	459720	1366100	240070	134000	507800	6	0.981874	0.757952	Q86YT6;B3KRA8	Q86YT6;B3KRA8	E3 ubiquitin-protein ligase MIB1	MIB1
23.5318	23.5571	22.5135	21.5543	22.2408	23.5419	337680	363310	461770	167330	138630	174170	1	0.485541	0.755134	Q14781	Q14781	Chromobox protein homolog 2	CBX2
25.3812	25.9309	25.0717	24.9213	24.6203	24.5873	2042000	1762000	2004900	1042100	387990	642060	7	1.29164	0.751625	A0A0C4DFX7;Q9H967;C9JE56	A0A0C4DFX7;Q9H967	WD repeat-containing protein 76	WDR76
24.505	24.2668	24.2031	23.5037	23.5713	23.6627	1020900	712320	552710	187600	113490	400510	5	2.71767	0.745727	Q2TB10;B7Z4V7;C9JLY3;C9K0M9;C9JHX9;Q49A13;A0A087WXB4	Q2TB10;B7Z4V7	Zinc finger protein 800	ZNF800
27.0227	26.4072	26.4313	25.8059	26.083	25.7403	7518800	4331600	6823300	2383100	963820	1864700	9	1.51444	0.744011	Q75MT5;P35250;B5BUD2;H7C5P4;A0A087WVY3;H7C5P1;H7C5Q7;F8WC37;H7C5A0;H7C5G4;H7C5S7	Q75MT5;P35250;B5BUD2;H7C5P4;A0A087WVY3	Replication factor C subunit 2	RFC2
26.4812	26.3238	26.4596	25.5551	25.7392	25.7547	1390600	905590	1657400	331070	257480	438090	19	3.09798	0.738539	Q7Z5J4;A0A1W2PQJ7;A8MXE8;J3QR08	Q7Z5J4;A0A1W2PQJ7	Retinoic acid-induced protein 1	RAI1
26.4693	26.554	26.3672	25.6105	26.0294	25.5353	2200000	2487900	3310900	962200	731010	1195100	13	1.97656	0.738432	Q9UQR0;B4DZR9;B4DRC2;H0Y6S1	Q9UQR0;B4DZR9;B4DRC2	Sex comb on midleg-like protein 2	SCML2
24.7693	24.8855	24.4559	24.3833	22.6851	24.8271	939390	1062600	1189900	398630	267770	999670	4	0.482502	0.738387	Q9UBL3;A8K6T5;F5H8F7;B4DPT1;H0YBF6;E5RFH5;B4DEM3	Q9UBL3;A8K6T5;F5H8F7;B4DPT1	Set1/Ash2 histone methyltransferase complex subunit ASH2	ASH2L
23.2639	23.6369	23.4256	21.9186	22.7526	23.4401	276000	351760	370770	112540	78177	285750	2	0.748499	0.738317	Q4KMQ1;H3BLU1	Q4KMQ1;H3BLU1	Taperin	TPRN
24.7637	24.8981	24.5369	22.058	24.8621	25.0669	2397000	2544400	2529800	1337100	883390	2622900	4	0.307852	0.737257	J3QL14;R4GN72;P61421;B2R7M1;F5GYQ1;B7Z6L9;B7Z788	J3QL14;R4GN72;P61421;B2R7M1;F5GYQ1;B7Z6L9;B7Z788	V-type proton ATPase subunit d 1	ATP6V0D1
25.1136	24.5012	25.1074	23.9266	24.3164	24.2704	1329300	882180	2067000	311690	320970	810770	5	1.44142	0.736243	Q8NDX5;E7EX82;A5YM43;B4E2T1;B4DYD1;H7C528;C9JAU4;H7C4H9	Q8NDX5;E7EX82;A5YM43;B4E2T1	Polyhomeotic-like protein 3	PHC3
24.0253	24.3376	24.2208	23.7845	22.4244	24.1743	618060	800240	1322600	516270	222560	707930	3	0.61157	0.733491	A0A024RCU9;Q96SB4;A8K8B2;H3BLV9;H0Y932;D6RBF8;H7C521;Q9UPE1;E7ETV6;Q59GF4	A0A024RCU9;Q96SB4;A8K8B2;H3BLV9	SRSF protein kinase 1	SRPK1
27.4776	27.5045	27.4066	26.8527	26.6976	26.6712	5027800	6981500	27303000	3412100	1974400	1914600	8	3.4626	0.722442	P35610;B1APM4;B7ZAT6;B4DFD8	P35610;B1APM4;B7ZAT6	Sterol O-acyltransferase 1;O-acyltransferase	SOAT1
26.4531	24.451	24.3509	24.7123	23.8264	24.5763	1911100	1693300	270760	361280	125210	348700	4	0.410627	0.713336	Q6AI38;Q8IWA4;A0A0C4DFN1;H7C5H5;Q4AEJ3;Q4AEJ4;Q05CV7;C9JQT7	Q6AI38;Q8IWA4;A0A0C4DFN1;H7C5H5;Q4AEJ3;Q4AEJ4;Q05CV7	Mitofusin-1	DKFZp762F247;MFN1;hfzo1;hfzo2
24.2032	24.3182	24.8095	22.7084	23.9422	24.5499	270010	311500	810880	122590	102390	397210	6	0.548582	0.710164	A0A087WYS3;H7C4X9;A0A087WVZ6;Q9ULU4;A0A087WV57;A6H8Y8;Q5JV90;Q5TH12;Q2HXV5;Q569J9	A0A087WYS3;H7C4X9;A0A087WVZ6;Q9ULU4;A0A087WV57;A6H8Y8;Q5JV90	Protein kinase C-binding protein 1	ZMYND8;DKFZp564P1772
23.807	23.5309	24.2385	23.4302	22.4473	23.5801	244160	130230	368390	136230	36873	105000	7	0.794325	0.706224	A6H8X9;B2RTS4;Q5SW79;B4DL23;H0Y2V6;E5RIH6;E5RGW7;E5RJT5;E5RFU8;E5RG47;H0Y4T4;E7EWM2;E7EMW0;Q6AZE1;B3KME6;Q96L14	A6H8X9;B2RTS4;Q5SW79;B4DL23;H0Y2V6	Centrosomal protein of 170 kDa	CEP170
24.2079	23.9893	24.2342	23.5823	23.8119	22.9996	3291400	2610500	4278300	1968500	1159600	1344000	1	1.25555	0.679221	A0A0M3HER2	A0A0M3HER2
30.2959	29.9757	30.2222	29.5798	29.5496	29.3269	16203000	11780000	25246000	7188500	3486900	7278200	54	2.24887	0.679174	Q8WWQ0;Q9NWP3	Q8WWQ0	PH-interacting protein	PHIP
26.4039	26.33	26.5395	25.7894	25.8435	25.6293	1601900	906340	2946700	480090	460370	392630	16	2.78087	0.67039	Q9H582;A7E234;Q9NVH8;A0A087WZL9;Q569I6;Q9NZF0;Q9H8J8;Q8NEI6;Q9H835	Q9H582;A7E234;Q9NVH8;A0A087WZL9;Q569I6	Zinc finger protein 644	ZNF644
25.4135	25.6398	26.2351	23.2529	26.0737	25.9597	6740400	7796800	13299000	4510400	5341300	8502100	2	0.281761	0.667376	Q8N726;R9S3C3	Q8N726;R9S3C3	Cyclin-dependent kinase inhibitor 2A. isoform 4	CDKN2A
25.4917	25.2737	25.1834	24.5845	24.7648	24.6203	1568200	1229100	1631200	653900	253320	827830	8	2.45694	0.659744	Q9H0H5;B2RE34;A0A024R136;F8VRD2;F8W1E5;Q9BZ74;F8VWX0;F8W1T4;F8W0L1;F8VZ66;F8VV37;F8VV47;F8VWY4;F8VVE5;Q9H9L9;H0YIK5;F8VVY0;F8VXH1;F8VQF5;F8VYH6;F8VUW9;F8VV39;F8VQZ5;F8VS54	Q9H0H5;B2RE34;A0A024R136;F8VRD2	Rac GTPase-activating protein 1	RACGAP1
23.6379	22.7471	23.3388	22.5687	23.5928	21.5881	616760	277650	541460	115290	73734	74187	2	0.445214	0.658035	Q8IV32	Q8IV32	Coiled-coil domain-containing protein 71	CCDC71
24.979	25.2785	24.7136	24.8496	25.3641	22.7955	1473300	2140300	2262100	2613100	2088300	1567400	3	0.336962	0.653969	O15533;A0A1U9X8L5;A0A0G2JKZ1;A0A024RCT1;A2AB90;A0A0G2JH37;A0A0A0MSV9;Q6P1N7;C9JA35;B7Z4V3;A0A0A0MT98	O15533;A0A1U9X8L5;A0A0G2JKZ1;A0A024RCT1;A2AB90;A0A0G2JH37;A0A0A0MSV9;Q6P1N7;C9JA35;B7Z4V3	Tapasin	TAPBP
23.472	23.4773	24.3048	23.0516	23.0458	23.1987	663300	726140	1203900	278210	166580	363530	3	1.09115	0.65264	Q12834;Q2VIM1;B4E1H5;B4DYP9	Q12834;Q2VIM1;B4E1H5	Cell division cycle protein 20 homolog	CDC20
25.0146	25.2503	25.2574	22.7781	25.2312	25.5619	3892000	5394300	4748200	1896000	1543100	4941400	3	0.299605	0.650373	Q2LE71;O15145;B2R4D5;C9JZD1;B4DM63;F8VR50	Q2LE71;O15145;B2R4D5;C9JZD1;B4DM63	Actin-related protein 2/3 complex subunit 3	ARPC3
22.7249	23.0633	22.571	21.7442	22.9366	21.7408	92721	151050	91381	36183	19516	21580	2	0.694351	0.645879	A0A075B6Q3;H7C4B2;Q5H9F3	A0A075B6Q3;H7C4B2;Q5H9F3	BCL-6 corepressor-like protein 1	BCORL1
25.9862	26.2394	25.8559	25.2526	25.552	25.3447	1242500	2097000	1751500	494820	476410	832820	12	1.96494	0.644099	Q69YH5;E9PEI0;A8K8Z0;B7Z5Q5;B3KRS8	Q69YH5;E9PEI0;A8K8Z0;B7Z5Q5	Cell division cycle-associated protein 2	CDCA2
25.2085	24.8358	25.084	24.3625	24.1914	24.6522	1504000	570320	688470	307560	107480	455110	7	1.67875	0.640752	Q8NB78;H0Y6H0	Q8NB78;H0Y6H0	Lysine-specific histone demethylase 1B	KDM1B
25.7761	25.4284	25.8139	26.5621	25.8289	22.7083	5963100	9250400	9397600	5754100	3086300	5857800	4	0.208474	0.639738	M0QXN5;P37198;A0A024QZF1	M0QXN5;P37198;A0A024QZF1	Nuclear pore glycoprotein p62	NUP62
28.7402	28.4754	28.3895	27.9337	28.0632	27.6959	4594700	5036300	6245200	2425800	1489000	2267900	27	1.87413	0.637449	Q71UH4;Q02880;B4DKD0;E9PCY5;Q59H80;Q6W6M6;B7ZB27;B4DLV2;Q8WTY5	Q71UH4;Q02880;B4DKD0;E9PCY5;Q59H80	DNA topoisomerase 2;DNA topoisomerase 2-beta	TOP2B
23.8238	23.3977	23.3424	22.7777	23.0074	22.8706	291610	215650	288230	133110	91998	144000	3	1.73012	0.636038	Q6P4F7;H3BQ41;H3BR51	Q6P4F7	Rho GTPase-activating protein 11A	ARHGAP11A
29.5266	29.2879	29.4585	28.7091	28.699	28.968	18198000	17146000	26261000	9643700	5045300	13007000	27	2.29906	0.632339	Q96T88;A0A087WVR3;A0A087WTW0;A0A087WWG9;B4E0F9;Q96PU4;B3KV82	Q96T88;A0A087WVR3;A0A087WTW0;A0A087WWG9	E3 ubiquitin-protein ligase UHRF1	UHRF1
26.2771	25.8194	26.0561	25.2286	25.5674	25.4611	3539300	2449900	3842600	1597500	905850	1674600	8	1.72355	0.631856	Q96GN5;A0A024RA51;A8K8X5;C9IZR6;C9JFL7;C9J8L0	Q96GN5;A0A024RA51;A8K8X5	Cell division cycle-associated 7-like protein	CDCA7L
25.7724	26.6013	25.3995	24.8758	25.8574	25.1506	1288300	4405900	836250	442110	577640	627300	4	0.614698	0.629779	Q6PCB5;H7C2D3;C9JM20	Q6PCB5;H7C2D3;C9JM20	Round spermatid basic protein 1-like protein	RSBN1L
28.8753	28.9138	28.9148	28.1981	28.385	28.2425	7123200	6777200	15853000	3644900	2346800	3857300	27	3.38278	0.626092	Q93009;B7ZAX6;Q6U8A4;H3BND8;B7Z855;B7Z7T5;F5H2X1;B7Z842;H3BUV0;H3BTM1;H3BRA2;H3BQD1;I3L2D8;H3BMF6	Q93009;B7ZAX6;Q6U8A4;H3BND8;B7Z855;B7Z7T5;F5H2X1	Ubiquitin carboxyl-terminal hydrolase 7;Ubiquitin carboxyl-terminal hydrolase	USP7
23.4624	23.2448	23.0411	22.4343	23.7337	21.7179	330080	311290	436710	71088	0	0	3	0.442564	0.620818	B7ZL72;E9PLV1;E9PRS0;Q9NQV6	B7ZL72;E9PLV1;E9PRS0;Q9NQV6	PR domain zinc finger protein 10	PRDM10
23.8752	24.9801	23.7524	23.6427	23.3857	23.7484	777520	2200900	1015600	940250	360760	592170	2	0.685507	0.610291	E9PH82;B4DT23;B4DY25;I6L9E8;Q8NCA5;B3KTW4	E9PH82;B4DT23;B4DY25;I6L9E8;Q8NCA5;B3KTW4	Protein FAM98A	FAM98A
27.6474	27.5511	27.7923	27.0354	27.1703	26.9555	8058500	6991200	12461000	5244600	2471800	4746400	12	2.53583	0.609892	Q9Y232;C9JQG7	Q9Y232	Chromodomain Y-like protein	CDYL
25.8714	26.0397	25.7249	25.2898	25.3348	25.1859	6930900	6834800	8596100	4185300	1835100	4869800	5	2.41655	0.608505	Q9P031;F8VNY5	Q9P031;F8VNY5	Thyroid transcription factor 1-associated protein 26	CCDC59
26.8026	27.7711	28.6471	27.0341	26.892	27.4714	2986900	7822200	45543000	2918100	2838200	5365800	3	0.469494	0.607736	P12235;A0A0S2Z3H3;A8K787;A0A0S2Z3C4;V9GYG0;A0A0S2Z359;Q59EP7;Q9H0C2	P12235;A0A0S2Z3H3;A8K787;A0A0S2Z3C4;V9GYG0	ADP/ATP translocase 1	SLC25A4
23.7566	24.0353	23.1365	23.5372	22.8813	22.696	165010	339430	299050	141490	26249	70713	4	0.75446	0.60469	Q4LDX3;A0A0A0N0M2;P23458	Q4LDX3;A0A0A0N0M2;P23458	Tyrosine-protein kinase JAK1	JAK1
24.873	24.7761	24.6933	24.7748	23.1354	24.6214	525710	511900	499480	298340	96953	272690	6	0.502226	0.603588	Q7Z589;E9PMC9;B3KWI5;B3KWW8;B4E1Z2;B4E247;B4DTW9;H0YET8;H0YCS3	Q7Z589;E9PMC9;B3KWI5;B3KWW8;B4E1Z2;B4E247	Protein EMSY	EMSY;C11orf30
25.3017	24.5623	24.531	24.242	24.2784	24.0741	873410	612910	1789600	228460	144590	543720	7	1.08694	0.600144	A0PJ70;Q8TF76;A8K9K0	A0PJ70;Q8TF76;A8K9K0	Serine/threonine-protein kinase haspin	GSG2
27.0786	26.9573	27.0451	26.449	26.4791	26.3606	2578700	2372900	3077400	2006400	1146800	1899900	11	3.52648	0.597392	H7BYN4;Q02241;H0YKQ5;H0YME6	H7BYN4;Q02241	Kinesin-like protein KIF23	KIF23
23.54	23.1645	24.4	22.8065	23.1493	23.3731	1258900	759570	1519400	301650	425610	440080	3	0.669499	0.591873	O95159;A0A024R576;B4DHV1;E9PMQ3;E9PQA5;E9PQ47;E9PNY1;H0YCU8;E9PJX1;E9PJ47	O95159;A0A024R576;B4DHV1;E9PMQ3;E9PQA5;E9PQ47;E9PNY1	Zinc finger protein-like 1	ZFPL1
23.7077	24.308	23.722	22.595	23.7809	23.6032	228760	1030800	698790	131060	134890	365380	3	0.630297	0.586194	E7ENV7;Q86YQ8;Q8N7E6	E7ENV7;Q86YQ8	Copine-8	CPNE8
23.4894	23.3572	23.4604	23.532	23.7236	21.294	773840	608830	926890	670240	208460	412330	2	0.305491	0.585799	Q9BSK2;D6RB26;D6RCF5;F6SDC8;Q96CQ1	Q9BSK2;D6RB26;D6RCF5;F6SDC8;Q96CQ1	Solute carrier family 25 member 33;Solute carrier family 25 member 36	SLC25A33;SLC25A36
26.4715	26.4485	26.0373	25.6705	25.8452	25.6997	2006800	1506600	1954300	868800	422800	1003100	13	1.73526	0.580629	O95696;A0A024R4W4;A0A024R4V5;B4DZ41;Q86X06;B7Z926;Q9Y4Q3;B4DZC2;B4E3L9;Q59G93;J3KQ61;Q5CZ83;A8WI62;A8WI61;H0Y7B4;Q8N4T7;F6XDC4;E9PSF3;E9PI60;A0A024RCX0;Q9ULD4	O95696;A0A024R4W4;A0A024R4V5;B4DZ41;Q86X06;B7Z926;Q9Y4Q3;B4DZC2;B4E3L9	Bromodomain-containing protein 1	BRD1;DKFZp434B094
26.5942	26.5196	27.0729	25.8192	25.9903	26.6461	1756400	1118200	3454600	798870	605260	1610900	14	0.878534	0.577026	A0A1B0GV09;Q9H9B1;A0A1B0GU48;A0A0C4DGF8;A0A1W2PPZ7;A0A0D9SFX4;A0A1B0GW79;A0PJE0;A0A1B0GWF6;A0A0D9SEQ1;A0A1B0GVZ8;A0A1B0GUD1;A0A0D9SEP2;A0A0D9SFS4;A0A0D9SER3;A0A0D9SFG7;A0A0D9SFD7;A0A0D9SEY2;A0A1B0GV89;A0A0D9SFM6;A0A1B0GTP4;Q71M33;A0A0D9SF38	A0A1B0GV09;Q9H9B1;A0A1B0GU48;A0A0C4DGF8	Histone-lysine N-methyltransferase EHMT1	EHMT1
23.3843	23.9683	23.788	23.2304	22.4045	23.7858	574280	247180	789860	386280	285900	546590	4	0.585636	0.573303	U3KQ90;Q59HG4;V9H027;P55199;A8KAP0	U3KQ90;Q59HG4;V9H027;P55199;A8KAP0	RNA polymerase II elongation factor ELL	ELL
25.0128	24.9782	25.113	24.4389	24.5347	24.4139	888620	555360	1213800	202410	221120	578670	6	3.32703	0.572165	A0A0A0MSU2;A0PJD3;Q6PJG2;A0A024R689;A0A1C7CYX1;H7C1L3	A0A0A0MSU2;A0PJD3;Q6PJG2;A0A024R689;A0A1C7CYX1;H7C1L3	ELM2 and SANT domain-containing protein 1	C14orf43;ELMSAN1
24.4663	24.1584	23.8168	22.2336	24.6232	23.902	1397400	1100200	1046800	482380	948730	871570	2	0.313116	0.560912	Q53FG6;Q15427;B3KUJ0	Q53FG6;Q15427;B3KUJ0	Splicing factor 3B subunit 4	SF3B4
26.0781	26.2644	25.8458	25.877	25.317	25.3166	2950200	2838900	2854900	1958400	441190	1462100	11	1.1813	0.559208	B3KMP2;A5D8X2;Q9UJX3;A0A024RBJ3;A8KAQ7;Q4KMX6;Q2M2R1;H0YIW2;H0YIX7	B3KMP2;A5D8X2;Q9UJX3;A0A024RBJ3;A8KAQ7;Q4KMX6;Q2M2R1	Anaphase-promoting complex subunit 7	ANAPC7
22.8738	23.2207	22.559	21.7887	22.7975	22.395	275550	390640	318890	96125	69538	221290	2	0.729424	0.55738	Q5SWX3;A8K6N9;A0A0A0MS52;Q13555;A0A0A0MT11;B4DVQ3;Q13280;H0Y6G2;Q8WU40;B3KY86	Q5SWX3;A8K6N9;A0A0A0MS52;Q13555;A0A0A0MT11;B4DVQ3;Q13280;H0Y6G2;Q8WU40;B3KY86	Calcium/calmodulin-dependent protein kinase type II subunit gamma	CAMK2G
23.9679	24.3721	24.3766	22.7085	24.2888	24.0644	449420	623270	1054500	337160	361560	505610	1	0.466161	0.551636	B3KRK8	B3KRK8
24.3639	23.9627	24.0539	23.5317	23.7687	23.4269	547120	366850	619610	193520	205960	174990	3	1.59908	0.551055	Q15361;B4DZG2;A0A024R8C1;A0A087WY09	Q15361;B4DZG2;A0A024R8C1	Transcription termination factor 1	TTF1
27.7623	28.0668	28.8004	27.6864	27.211	28.0954	29330000	53337000	52320000	29827000	7791200	28645000	4	0.611627	0.545582	O75607	O75607	Nucleoplasmin-3	NPM3
25.3228	25.4269	25.189	24.7001	24.9208	24.6822	418960	730710	683250	266840	157320	326890	6	2.21265	0.545198	Q9ULM3;Q9H8R0	Q9ULM3	YEATS domain-containing protein 2	YEATS2
25.9764	26.0859	25.7795	25.3779	25.5938	25.2503	614660	648070	649680	309020	267330	303780	13	1.79774	0.539913	Q5VWN6;Q6IPC8;J3KPH3	Q5VWN6	Protein FAM208B	FAM208B
25.1783	25.1796	25.4036	24.603	24.4714	25.0875	4261100	1798600	5318900	1115300	900680	2402900	4	1.24113	0.533201	Q53GE2;Q53GC7;P47755;A4D0V4;C9JUG7;F8W9N7;A0A0D9SET8;B4DE01	Q53GE2;Q53GC7;P47755;A4D0V4;C9JUG7;F8W9N7	F-actin-capping protein subunit alpha-2	CAPZA2
25.4786	25.5111	25.8722	24.3667	25.4366	25.4741	1741800	1942900	4019600	775690	733330	1521700	8	0.617381	0.528149	Q1ED39;H3BMC9;H3BNU8;H3BPL4	Q1ED39	Lysine-rich nucleolar protein 1	KNOP1
30.3108	30.4178	30.4871	29.922	30.0144	29.698	44112000	36012000	62258000	25278000	15766000	24224000	30	2.10256	0.52715	Q8IY81;B4DKU3	Q8IY81;B4DKU3	pre-rRNA processing protein FTSJ3	FTSJ3
28.0348	28.0456	27.9842	27.453	27.5892	27.4507	4630800	4645500	7525100	2588100	1940500	3084000	27	3.34431	0.523888	Q7Z3K3;B4DSK8;H0YCT3;M0R2X2;H7C238;A6PW30;E9PJY9;E9PIR8	Q7Z3K3;B4DSK8	Pogo transposable element with ZNF domain	POGZ
28.0864	28.0312	27.8758	27.4197	27.7661	27.2398	10290000	11185000	12847000	5785500	3527100	7018800	13	1.45487	0.522603	Q5SY16	Q5SY16	Polynucleotide 5-hydroxyl-kinase NOL9	NOL9
24.106	23.7232	26.0164	24.3907	23.816	24.074	8228900	3845200	22317000	9096100	2733900	6340100	2	0.289459	0.521681	P60059;A0A024QYZ0	P60059;A0A024QYZ0	Protein transport protein Sec61 subunit gamma	SEC61G
28.8352	28.632	28.742	28.3062	28.0551	28.3008	17831000	14929000	22474000	11790000	4793100	11022000	19	2.14975	0.515701	P42696;A2A2V2;Q5TCT4;H7C5M1	P42696;A2A2V2	RNA-binding protein 34	RBM34
31.3365	32.4651	31.681	31.2011	31.8319	30.9064	117940000	224640000	170690000	94669000	76633000	78568000	10	0.524442	0.514402	P38159;H3BT71;B4E352;H0Y6E7;B3KRG5;H3BUY5;H3BR27;O75526;A8K8A6;H3BNC1;Q8N7X1	P38159;H3BT71;B4E352;H0Y6E7;B3KRG5;H3BUY5	RNA-binding motif protein. X chromosome;RNA-binding motif protein. X chromosome. N-terminally processed	RBMX
27.5644	27.5035	27.5886	26.9106	27.138	27.0685	3002200	2940200	3522700	1507300	944680	1707400	22	2.69082	0.513146	Q5VZL5;H7C1I7	Q5VZL5;H7C1I7	Zinc finger MYM-type protein 4	ZMYM4
24.108	24.5688	24.2513	23.7995	24.0388	23.5718	266670	279160	289960	208050	105220	197690	7	1.24024	0.506027	E3W994;Q96F87;B4DM73;J3KR49;O75122;A0A0U1RQI6;E7ERI8;E7EW49;Q6N029;H7C4M5;A0A024R2L7;B3KR06;E7ENG2;B4DG03;A0A024R2J1;Q8NB74;A0A024R2S6	E3W994;Q96F87;B4DM73;J3KR49;O75122;A0A0U1RQI6;E7ERI8;E7EW49	CLIP-associating protein 2	CLASP2
22.8813	22.9484	23.078	22.3397	22.26	22.8006	117640	121000	229240	169720	81325	97462	2	1.32095	0.502488	H7C1N2;J3KR05;O75128	H7C1N2;J3KR05;O75128	Protein cordon-bleu	COBL
26.4257	26.5294	26.3522	25.7899	25.9737	26.0365	1901300	1637300	2205600	474030	357720	1203100	11	2.29485	0.50234	Q9UBW7;A0A024RDS3;A8K126;B4DZH0;A0A087X151	Q9UBW7;A0A024RDS3;A8K126;B4DZH0	Zinc finger MYM-type protein 2	ZMYM2
26.0544	26.3676	26.0816	25.5891	25.7254	25.6867	8550900	9703600	11347000	5627500	3851200	6715700	2	2.00961	0.500814	Q13243;A0A024R6D8;Q59EK7;Q86U32	Q13243;A0A024R6D8;Q59EK7;Q86U32	Serine/arginine-rich splicing factor 5	SRSF5;SFRS5
[truncated: 1,568 more rows]

## Sheet: INCENP
INCENP_1	INCENP_2	INCENP_3	IgG_1	IgG_2	IgG_3	iBAQ INCENP_1	iBAQ INCENP_2	iBAQ INCENP_3	iBAQ IgG_1	iBAQ IgG_2	iBAQ IgG_3	Unique peptides	-Log t-test p value	t-test Difference	Protein IDs	Majority protein IDs	Protein names	Gene names
[truncated: 2,014 more rows]
